# Supplementary material for: Human DNA polymerase ε is a source of C>T mutations at CpG dinucleotides
Source: Nat Genet. 2024 Oct 10;56(11):2506–16. doi: 10.1038/s41588-024-01945-x (PMC11549043; doi:10.1038/s41588-024-01945-x)
Supplement: Supplementary file 4 — Supplementary Tables 1–11. [file 41588_2024_1945_MOESM4_ESM.xlsx]

## Sheet: Summary
Table1	Forward and reverse adapters and the ROI sequences.
Table2	Positions of artificially introduced mutations.
Table3	PER-seq samples.
Table4	PER-seq measured error signatures of KLENOW-EXO-, KAPA-U+, POLE-P286R, POLE-EXO-, and POLE-WT.
Table5	Human cancer samples.
Table6	Pathogenic mutations in the exonuclease domain of POLE and POLD1, used in the definition of POLEd and PROF samples (see Methods).
Table7	BS-seq and H3K36me3 datasets.

## Sheet: Table1
Adapters
Adapter type	Illumina adapter	Unique Molecular Barcode (UMI)	Sample barcode	Priming sequence
Forward adapter TP53 template	AATGATACGGCGACCACCGAGATCTACACTCTTTCCCTACACGACGCTCTTCCGATCT	NNNNNNNNNNNNNNNNNNN	e.g., CGAC in sample n1_01_TP53_C_T_POLE_WT_Kapa	tTAGGACCTGATTTCCTTACTG
Reverse adapter TP53 template	CAAGCAGAAGACGGCATACGAGATCGGTCTCGGCATTCCTGCTGAACCGCTCTTCCGATCT	NNNN	e.g., AA in sample n1_01_TP53_C_T_POLE_WT_Kapa	cGGAGATAAAAGTGAATCTGA
Forward adapter TP53 daughter	AATGATACGGCGACCACCGAGATCTACACTCTTTCCCTACACGACGCTCTTCCGATCT	NNNNNNNNNNNNNNNNNNN	e.g., ACGT in n1_02_TP53_C_D_POLE_WT_Kapa	agctcGGAGATAAAAGTGAA
Reverse adapter TP53 daughter	CAAGCAGAAGACGGCATACGAGATCGGTCTCGGCATTCCTGCTGAACCGCTCTTCCGATCT	NNNN	e.g., TG in sample n1_02_TP53_C_D_POLE_WT_Kapa	agcttTAGGACCTGATTTCC
Forward adapter DNMT1 template	AATGATACGGCGACCACCGAGATCTACACTCTTTCCCTACACGACGCTCTTCCGATCT	NNNNNNNNNNNNNNNNNNN	e.g., AC in sample n1_13_DNMT_C_T_POLE_WT_Kapa	tTAACGAGGCCTCTCCCG
Reverse adapter DNMT1 template	CAAGCAGAAGACGGCATACGAGATCGGTCTCGGCATTCCTGCTGAACCGCTCTTCCGATCT	NNNN	e.g., TGGC in sample n1_13_DNMT_C_T_POLE_WT_Kapa	cACTTTGACCCCGAAGCC
Forward adapter DNMT1 daughter	AATGATACGGCGACCACCGAGATCTACACTCTTTCCCTACACGACGCTCTTCCGATCT	NNNNNNNNNNNNNNNNNNN	e.g., AC in sample n1_14_DNMT_C_D_POLE_WT_Kapa	agctcACTTTGACCCCG
Reverse adapter DNMT1 daughter	CAAGCAGAAGACGGCATACGAGATCGGTCTCGGCATTCCTGCTGAACCGCTCTTCCGATCT	NNNN	e.g., TACG in sample n1_14_DNMT_C_D_POLE_WT_Kapa	agcttTAACGAGGCCTCTC
ROI (reverse complement)
TP53 template	tTAGGACCTGATTTCCTTACTGCCTCTTGCTTCTCTTTTCCTATCCTGAGTAGTGGTAATCTACTGGGACGGAACAGCTTTGAGGTGCGTGTTTGTGCCTGTCCTGGGAGAGACCGGCGCACAGAGGAAGAGAATCTCCGCAAGAAAGGGGAGCCTCACCACGAGCTGCCCCCAGGGAGCACTAAGCGAGGTAAGCAAGCAGGACAAGAAGCGGTGGAGGAGACCAAGGGTGCAGTTATGCCTCAGATTCACTTTTATCTCCg
TP53 daughter	agctcGGAGATAAAAGTGAATCTGAGGCATAACTGCACCCTTGGTCTCCTCCACCGCTTCTTGTCCTGCTTGCTTACCTCGCTTAGTGCTCCCTGGGGGCAGCTCGTGGTGAGGCTCCCCTTTCTTGCGGAGATTCTCTTCCTCTGTGCGCCGGTCTCTCCCAGGACAGGCACAAACACGCACCTCAAAGCTGTTCCGTCCCAGTAGATTACCACTACTCAGGATAGGAAAAGAGAAGCAAGAGGCAGTAAGGAAATCAGGTCCTAaagct
DNMT1 template	tTAACGAGGCCTCTCCCGCTCGCAGGCCTGAGAACACCCACAAGTCCACTCCAGCGAGCTACCACGCAGACATCAACCTGCTCTACTGGAGCGACGAGGAGGCCGTGGTGGACTTCAAGGCTGTGCAGGGCCGCTGCACCGTGGAGTATGGGGAGGACCTGCCCGAGTGCGTCCAGGTGTACTCCATGGGCGGCCCCAACCGCTTCTACTTCCTCGAGGTGGTGCCCCTGCTTGCTAGAGGGAAGGCTTCGGGGTCAAAGTg
DNMT1 daughter	agctcACTTTGACCCCGAAGCCTTCCCTCTAGCAAGCAGGGGCACCACCTCGAGGAAGTAGAAGCGGTTGGGGCCGCCCATGGAGTACACCTGGACGCACTCGGGCAGGTCCTCCCCATACTCCACGGTGCAGCGGCCCTGCACAGCCTTGAAGTCCACCACGGCCTCCTCGTCGCTCCAGTAGAGCAGGTTGATGTCTGCGTGGTAGCTCGCTGGAGTGGACTTGTGGGTGTTCTCAGGCCTGCGAGCGGGAGAGGCCTCGTTAaagct

## Sheet: Table2
	TP53 template					TP53 daughter					DNMT1 template					DNMT1 daughter
	mutName	mutPosition	ref	alt	inAllSamples	mutName	mutPosition	fromBase	toBase	inAllSamples	mutName	mutPosition	fromBase	toBase	inAllSamples	mutName	mutPosition	fromBase	toBase	inAllSamples
	p53MutA	23	C	T	0	p53MutA	26	G	T	0	dnmtMutC	23	C	T	1	dnmtMutC	28	T	C	1
	p53MutA	32	T	C	0	p53MutA	27	G	C	0	dnmtMutC	29	T	A	1	dnmtMutC	33	C	G	1
	p53MutA	33	C	G	0	p53MutA	28	C	T	0	dnmtMutC	36	A	T	1	dnmtMutC	38	A	T	1
	p53MutA	240	G	A	0	p53MutA	235	G	C	0	dnmtMutC	229	T	A	1	dnmtMutC	231	T	A	1
	p53MutA	241	C	G	0	p53MutA	236	A	G	0	dnmtMutC	234	G	C	1	dnmtMutC	238	A	T	1
	p53MutA	242	C	A	0	p53MutA	245	G	A	0	dnmtMutC	239	A	G	1	dnmtMutC	244	G	A	1
	p53MutB	35	C	A	0	p53MutB	29	A	C	0	dnmtMutD	23	C	A	1	dnmtMutD	28	T	A	1
	p53MutB	36	T	G	0	p53MutB	30	T	G	0	dnmtMutD	29	T	C	1	dnmtMutD	33	C	T	1
	p53MutB	37	T	A	0	p53MutB	32	A	G	0	dnmtMutD	36	A	G	1	dnmtMutD	38	A	G	1
	p53MutB	236	T	C	0	p53MutB	231	A	T	0	dnmtMutD	229	T	C	1	dnmtMutD	231	T	C	1
	p53MutB	238	A	C	0	p53MutB	232	A	C	0	dnmtMutD	234	G	A	1	dnmtMutD	238	A	G	1
	p53MutB	239	T	G	0	p53MutB	233	G	T	0	dnmtMutD	239	A	T	1	dnmtMutD	244	G	T	1
	p53MutC	39	T	G	1	p53MutC	31	A	T	1	dnmtMutG	23	C	G	1	dnmtMutG	28	T	G	1
	p53MutC	43	A	T	1	p53MutC	35	G	A	1	dnmtMutG	29	T	G	1	dnmtMutG	33	C	A	1
	p53MutC	48	G	C	1	p53MutC	41	T	C	1	dnmtMutG	36	A	C	1	dnmtMutG	38	A	C	1
	p53MutC	227	A	G	1	p53MutC	220	C	G	1	dnmtMutG	229	T	G	1	dnmtMutG	231	T	G	1
	p53MutC	233	C	T	1	p53MutC	225	T	A	1	dnmtMutG	234	G	T	1	dnmtMutG	238	A	C	1
	p53MutC	237	T	A	1	p53MutC	229	A	C	1	dnmtMutG	239	A	C	1	dnmtMutG	244	G	C	1
	p53MutD	39	T	A	1	p53MutD	31	A	G	1
	p53MutD	43	A	G	1	p53MutD	35	G	T	1
	p53MutD	48	G	A	1	p53MutD	41	T	G	1
	p53MutD	227	A	C	1	p53MutD	220	C	T	1
	p53MutD	233	C	A	1	p53MutD	225	T	C	1
	p53MutD	237	T	C	1	p53MutD	229	A	T	1
	p53MutE	49	A	T	0	p53MutE	33	C	A	0
	p53MutE	50	G	C	0	p53MutE	36	C	G	0
	p53MutE	53	G	A	0	p53MutE	42	T	C	0
	p53MutE	226	A	G	0	p53MutE	215	C	T	0
	p53MutE	232	G	C	0	p53MutE	218	C	G	0
	p53MutE	235	G	T	0	p53MutE	219	T	A	0
	p53MutF	55	G	T	0	p53MutF	43	G	A	0
	p53MutF	56	G	T	0	p53MutF	44	G	C	0
	p53MutF	58	A	C	0	p53MutF	45	T	A	0
	p53MutF	223	A	T	0	p53MutF	210	T	G	0
	p53MutF	224	C	G	0	p53MutF	212	C	A	0
	p53MutF	225	C	T	0	p53MutF	213	C	A	0
	p53MutG	39	T	C	1	p53MutG	31	A	C	1
	p53MutG	43	A	C	1	p53MutG	35	G	C	1
	p53MutG	48	G	T	1	p53MutG	41	T	A	1
	p53MutG	227	A	T	1	p53MutG	220	C	A	1
	p53MutG	233	C	G	1	p53MutG	225	T	G	1
	p53MutG	237	T	G	1	p53MutG	229	A	G	1

## Sheet: Table3
sampleName	isTP53	isTopStrand	isMethylated	isParental	isFilled	isTemplate	isDaughter	isPOLE	fillingPol	libraryName	sampleBarcode (Fw|Rv)	amplificationPol	subtract_PT	subtract_T	subtract_PD	input_pg	output_ng	nWellCoveredMolecules	covN	nN	nC_CpG	nC_CpH	nC_DCM	mutationFrequency_raw	mutationFrequency_final	mutationFrequency_final_CpGtoTpG	mutationFrequency_final_CpHtoTpH
v1_01_TP53_C_parent_Kapa	TRUE	TRUE	FALSE	FALSE	FALSE	FALSE	FALSE	FALSE	-	validation1	A|TCCGA	KAPA U+				1000		1072056	202284054	190	8	35	2	8.62137e-06
v1_02_TP53_mC_parent_Kapa	TRUE	TRUE	TRUE	FALSE	FALSE	FALSE	FALSE	FALSE	-	validation1	|GTACGT	KAPA U+				1000		1303470	244660489	190	8	35	2	1.12959e-05
n1_01_TP53_C_T_POLE_WT_Kapa	TRUE	TRUE	FALSE	FALSE	TRUE	TRUE	FALSE	TRUE	POLE WT	novaseq1	CGAC|AA	KAPA U+	n1_25_TP53_C_PT_0C_Kapa			1500	760.2	1414423	302519389	214	8	42	2	7.9554e-06	1.87811e-06	4.09447e-07	1.05973e-07
n1_02_TP53_C_D_POLE_WT_Kapa	TRUE	FALSE	FALSE	FALSE	TRUE	FALSE	TRUE	TRUE	POLE WT	novaseq1	ACGT|TG	KAPA U+	n1_25_TP53_C_PT_0C_Kapa	n1_01_TP53_C_T_POLE_WT_Kapa	n1_26_TP53_C_PD_0C_Kapa	1500	74.64	792568	178022235	225	8	62	2	2.75e-05	1.21056e-05	1.95628e-05	8.78673e-06
n1_03_TP53_mC_T_POLE_WT_Kapa	TRUE	TRUE	TRUE	FALSE	TRUE	TRUE	FALSE	TRUE	POLE WT	novaseq1	ACGT|AC	KAPA U+	n1_27_TP53_mC_PT_0C_Kapa			1500	206.22	719769	153901285	214	8	42	2	1.13662e-05	3.61474e-06	1.64604e-06	1.48315e-06
n1_04_TP53_mC_D_POLE_WT_Kapa	TRUE	FALSE	TRUE	FALSE	TRUE	FALSE	TRUE	TRUE	POLE WT	novaseq1	CGTA|GC	KAPA U+	n1_27_TP53_mC_PT_0C_Kapa	n1_03_TP53_mC_T_POLE_WT_Kapa	n1_26_TP53_C_PD_0C_Kapa	1500	31.86	226988	51029145	225	8	62	2	3.02389e-05	1.46736e-05	6.56238e-05	7.925e-06
n1_05_TP53_C_T_POLE_NULL_Kapa	TRUE	TRUE	FALSE	FALSE	TRUE	TRUE	FALSE	TRUE	POLE NULL	novaseq1	GGCTCA|	KAPA U+	n1_25_TP53_C_PT_0C_Kapa			1500	678.3	1298555	277362355	214	8	42	2	1.01657e-05	3.73945e-06	4.90182e-06	3.42283e-06
n1_06_TP53_C_D_POLE_NULL_Kapa	TRUE	FALSE	FALSE	FALSE	TRUE	FALSE	TRUE	TRUE	POLE NULL	novaseq1	A|TACTG	KAPA U+	n1_25_TP53_C_PT_0C_Kapa	n1_05_TP53_C_T_POLE_NULL_Kapa	n1_26_TP53_C_PD_0C_Kapa	1500	50.76	547318	122963944	225	8	62	2	0.000195403	0.00017711	0.000263741	8.54763e-05
n1_07_TP53_mC_T_POLE_NULL_Kapa	TRUE	TRUE	TRUE	FALSE	TRUE	TRUE	FALSE	TRUE	POLE NULL	novaseq1	AC|CGCC	KAPA U+	n1_27_TP53_mC_PT_0C_Kapa			1500	476.7	1410232	301607616	214	8	42	2	1.08455e-05	3.21455e-06	3.66755e-07	3.23226e-07
n1_08_TP53_mC_D_POLE_NULL_Kapa	TRUE	FALSE	TRUE	FALSE	TRUE	FALSE	TRUE	TRUE	POLE NULL	novaseq1	AC|ACTT	KAPA U+	n1_27_TP53_mC_PT_0C_Kapa	n1_07_TP53_mC_T_POLE_NULL_Kapa	n1_26_TP53_C_PD_0C_Kapa	1500	73.44	382275	85936940	225	8	62	2	0.000212953	0.000195227	0.000438457	9.93987e-05
n1_09_TP53_C_T_POLE_P286R_Kapa	TRUE	TRUE	FALSE	FALSE	TRUE	TRUE	FALSE	TRUE	POLE P286R	novaseq1	ACGTAC|	KAPA U+	n1_25_TP53_C_PT_0C_Kapa			1500	411.18	915587	195593060	214	8	42	2	1.12395e-05	4.80008e-06	3.66024e-06	2.98533e-06
n1_10_TP53_C_D_POLE_P286R_Kapa	TRUE	FALSE	FALSE	FALSE	TRUE	FALSE	TRUE	TRUE	POLE P286R	novaseq1	GCACG|A	KAPA U+	n1_25_TP53_C_PT_0C_Kapa	n1_09_TP53_C_T_POLE_P286R_Kapa	n1_26_TP53_C_PD_0C_Kapa	1500	28.68	106828	23999638	225	8	62	2	0.000359991	0.000340669	0.000598204	0.000232265
n1_11_TP53_mC_T_POLE_P286R_Kapa	TRUE	TRUE	TRUE	FALSE	TRUE	TRUE	FALSE	TRUE	POLE P286R	novaseq1	|GTACGT	KAPA U+	n1_27_TP53_mC_PT_0C_Kapa			1500	35.994	933683	199420530	214	8	42	2	1.24465e-05	4.63877e-06	5.47194e-06	3.4622e-06
n1_12_TP53_mC_D_POLE_P286R_Kapa	TRUE	FALSE	TRUE	FALSE	TRUE	FALSE	TRUE	TRUE	POLE P286R	novaseq1	TTATGA|	KAPA U+	n1_27_TP53_mC_PT_0C_Kapa	n1_11_TP53_mC_T_POLE_P286R_Kapa	n1_26_TP53_C_PD_0C_Kapa	1500	28.08	140108	31492834	225	8	62	2	0.000380375	0.000361215	0.000854571	0.000239815
n1_13_DNMT_C_T_POLE_WT_Kapa	FALSE	TRUE	FALSE	FALSE	TRUE	TRUE	FALSE	TRUE	POLE WT	novaseq1	AC|TGGC	KAPA U+	n1_25_TP53_C_PT_0C_Kapa			1500	15.588	363911	80028282	220	13	57	1	1.43138e-05	7.90003e-06	7.06548e-07	1.38133e-06
n1_14_DNMT_C_D_POLE_WT_Kapa	FALSE	FALSE	FALSE	FALSE	TRUE	FALSE	TRUE	TRUE	POLE WT	novaseq1	AC|TACG	KAPA U+	n1_25_TP53_C_PT_0C_Kapa	n1_01_TP53_C_T_POLE_WT_Kapa	n1_26_TP53_C_PD_0C_Kapa	1500	33.06	177470	39903811	225	14	58	1	2.60824e-05	1.0958e-05	2.02873e-05	5.32014e-06
n1_15_DNMT_mC_T_POLE_WT_Kapa	FALSE	TRUE	TRUE	FALSE	TRUE	TRUE	FALSE	TRUE	POLE WT	novaseq1	ACGTA|A	KAPA U+	n1_27_TP53_mC_PT_0C_Kapa			1500	33.24	213592	46906430	220	13	57	1	1.83759e-05	1.09344e-05	2.15424e-06	1.34948e-06
n1_16_DNMT_mC_D_POLE_WT_Kapa	FALSE	FALSE	TRUE	FALSE	TRUE	FALSE	TRUE	TRUE	POLE WT	novaseq1	ACG|AGC	KAPA U+	n1_27_TP53_mC_PT_0C_Kapa	n1_03_TP53_mC_T_POLE_WT_Kapa	n1_26_TP53_C_PD_0C_Kapa	1500	17.076	72375	16241046	225	14	58	1	2.79958e-05	1.27282e-05	3.26985e-05	4.93262e-06
n1_17_DNMT_C_T_POLE_NULL_Kapa	FALSE	TRUE	FALSE	FALSE	TRUE	TRUE	FALSE	TRUE	POLE NULL	novaseq1	CAG|GCT	KAPA U+	n1_25_TP53_C_PT_0C_Kapa			1500	36.12	298600	65597948	220	13	57	1	1.6107e-05	9.79887e-06	1.98553e-06	4.17643e-07
n1_18_DNMT_C_D_POLE_NULL_Kapa	FALSE	FALSE	FALSE	FALSE	TRUE	FALSE	TRUE	TRUE	POLE NULL	novaseq1	ACGTA|C	KAPA U+	n1_25_TP53_C_PT_0C_Kapa	n1_05_TP53_C_T_POLE_NULL_Kapa	n1_26_TP53_C_PD_0C_Kapa	1500	26.4	179851	40417670	225	14	58	1	0.000173025	0.000155137	0.000260125	9.6194e-05
n1_19_DNMT_mC_T_POLE_NULL_Kapa	FALSE	TRUE	TRUE	FALSE	TRUE	TRUE	FALSE	TRUE	POLE NULL	novaseq1	ACGT|CA	KAPA U+	n1_27_TP53_mC_PT_0C_Kapa			1500	65.04	558634	122845492	220	13	57	1	1.98784e-05	1.23388e-05	6.52021e-07	3.53285e-07
n1_20_DNMT_mC_D_POLE_NULL_Kapa	FALSE	FALSE	TRUE	FALSE	TRUE	FALSE	TRUE	TRUE	POLE NULL	novaseq1	|GACTAT	KAPA U+	n1_27_TP53_mC_PT_0C_Kapa	n1_07_TP53_mC_T_POLE_NULL_Kapa	n1_26_TP53_C_PD_0C_Kapa	1500	54.12	501358	112702128	225	14	58	1	0.000190422	0.000172822	0.000416104	9.07151e-05
n1_21_DNMT_C_T_POLE_P286R_Kapa	FALSE	TRUE	FALSE	FALSE	TRUE	TRUE	FALSE	TRUE	POLE P286R	novaseq1	|CAATGT	KAPA U+	n1_25_TP53_C_PT_0C_Kapa			1500	37.68	312052	68540476	220	13	57	1	1.57216e-05	9.30868e-06	7.7979e-06	3.98343e-06
n1_22_DNMT_C_D_POLE_P286R_Kapa	FALSE	FALSE	FALSE	FALSE	TRUE	FALSE	TRUE	TRUE	POLE P286R	novaseq1	GATC|AT	KAPA U+	n1_25_TP53_C_PT_0C_Kapa	n1_09_TP53_C_T_POLE_P286R_Kapa	n1_26_TP53_C_PD_0C_Kapa	1500	25.62	179643	40376560	225	14	58	1	0.000365742	0.000346543	0.000683242	0.000285716
n1_23_DNMT_mC_T_POLE_P286R_Kapa	FALSE	TRUE	TRUE	FALSE	TRUE	TRUE	FALSE	TRUE	POLE P286R	novaseq1	A|ATCGA	KAPA U+	n1_27_TP53_mC_PT_0C_Kapa			1500	25.08	322921	71010852	220	13	57	1	1.76293e-05	9.90575e-06	1.73531e-06	2.62302e-06
n1_24_DNMT_mC_D_POLE_P286R_Kapa	FALSE	FALSE	TRUE	FALSE	TRUE	FALSE	TRUE	TRUE	POLE P286R	novaseq1	A|TCCGA	KAPA U+	n1_27_TP53_mC_PT_0C_Kapa	n1_11_TP53_mC_T_POLE_P286R_Kapa	n1_26_TP53_C_PD_0C_Kapa	1500	22.392	138822	31201174	225	14	58	1	0.000379776	0.000360738	0.000901142	0.000268601
n1_25_TP53_C_PT_0C_Kapa	TRUE	TRUE	FALSE	TRUE	FALSE	FALSE	FALSE	FALSE	-	novaseq1	TT|CGTA	KAPA U+				1500	1898.4	6172863	1312056184	214	8	42	2	6.49384e-06
n1_26_TP53_C_PD_0C_Kapa	TRUE	FALSE	FALSE	TRUE	FALSE	FALSE	FALSE	FALSE	-	novaseq1	CT|ATGC	KAPA U+				1500	79.212	570982	128307914	225	8	62	2	1.4563e-05
n1_27_TP53_mC_PT_0C_Kapa	TRUE	TRUE	TRUE	TRUE	FALSE	FALSE	FALSE	FALSE	-	novaseq1	ACG|CAT	KAPA U+				1500	1713.6	4278791	912808026	214	8	42	2	7.87424e-06
n1_28_TP53_mC_PD_0C_Kapa	TRUE	FALSE	TRUE	TRUE	FALSE	FALSE	FALSE	FALSE	-	novaseq1	TACGTC|	KAPA U+				1500	114.66	658846	147989740	225	8	62	2	1.90518e-05
n3_01_TP53_T_POLE_WT_C	TRUE	TRUE	FALSE	FALSE	TRUE	TRUE	FALSE	TRUE	POLE WT	novaseq3	G|TCCGA	Q5U	n3_15_TP53_PT_C			3000	153.56	3681588	784360498	214	8	42	2	4.58585e-06	2.74311e-06	1.45828e-07	1.26989e-07
n3_02_TP53_T_POLE_WT_mC	TRUE	TRUE	TRUE	FALSE	TRUE	TRUE	FALSE	TRUE	POLE WT	novaseq3	TT|CGCC	Q5U	n3_16_TP53_PT_mC			3000	139.48	3097040	658202269	214	8	42	2	4.9738e-06	2.86322e-06	7.77973e-08	8.34622e-08
n3_03_TP53_T_POLE_NULL_C	TRUE	TRUE	FALSE	FALSE	TRUE	TRUE	FALSE	TRUE	POLE NULL	novaseq3	ACG|CAT	Q5U	n3_15_TP53_PT_C			3000	106.04	2378688	506520709	214	8	42	2	6.93645e-06	5.0603e-06	3.23306e-06	2.12855e-06
n3_04_TP53_T_POLE_NULL_mC	TRUE	TRUE	TRUE	FALSE	TRUE	TRUE	FALSE	TRUE	POLE NULL	novaseq3	AC|CGTA	Q5U	n3_16_TP53_PT_mC			3000	84.04	3503961	746473874	214	8	42	2	6.58009e-06	4.39264e-06	2.16318e-06	1.09129e-06
n3_05_TP53_T_POLE_P286R_C	TRUE	TRUE	FALSE	FALSE	TRUE	TRUE	FALSE	TRUE	POLE P286R	novaseq3	A|TACTT	Q5U	n3_15_TP53_PT_C			3000	120.12	2553141	545205712	214	8	42	2	7.95175e-06	6.08399e-06	3.9474e-06	2.48158e-06
n3_06_TP53_T_POLE_P286R_mC	TRUE	TRUE	TRUE	FALSE	TRUE	TRUE	FALSE	TRUE	POLE P286R	novaseq3	ACGTAC|	Q5U	n3_16_TP53_PT_mC			3000	119.24	4276309	911134342	214	8	42	2	7.20077e-06	5.00876e-06	2.19644e-06	1.04083e-06
n3_09_TP53_T_KLENOW_NULL_C	TRUE	TRUE	FALSE	FALSE	TRUE	TRUE	FALSE	FALSE	KLENOW NULL	novaseq3	ACGT|AA	Q5U	n3_15_TP53_PT_C			3000	97.68	8193916	1721741777	214	8	42	2	2.47899e-05	2.29053e-05	6.08061e-06	5.74574e-06
n3_10_TP53_T_KLENOW_NULL_mC	TRUE	TRUE	TRUE	FALSE	TRUE	TRUE	FALSE	FALSE	KLENOW NULL	novaseq3	CCG|ACC	Q5U	n3_16_TP53_PT_mC			3000	93.28	6501174	1354988407	214	8	42	2	2.32491e-05	2.10579e-05	4.51942e-06	5.15499e-06
n3_11_TP53_T_KAPA_U_C	TRUE	TRUE	FALSE	FALSE	TRUE	TRUE	FALSE	FALSE	KAPA U+	novaseq3	CGCGG|C	Q5U	n3_15_TP53_PT_C			3000	110.44	5540809	1166338488	214	8	42	2	3.54101e-06	1.82024e-06	8.60633e-08	3.98556e-08
n3_12_TP53_T_KAPA_U_mC	TRUE	TRUE	TRUE	FALSE	TRUE	TRUE	FALSE	FALSE	KAPA U+	novaseq3	|AAGCAC	Q5U	n3_16_TP53_PT_mC			3000	92.84	3573730	762624425	214	8	42	2	5.56594e-06	3.48448e-06	1.6451e-08	1.02382e-07
n3_13_TP53_PT_C_art7a	TRUE	TRUE	FALSE	TRUE	FALSE	FALSE	FALSE	FALSE	-	novaseq3	|GTACGT	Q5U				1500	93.28	3260879	614608995	190	8	35	2	1.46561e-06
n3_14_TP53_PT_C_art7b	TRUE	TRUE	FALSE	TRUE	FALSE	FALSE	FALSE	FALSE	-	novaseq3	GGCTCA|	Q5U				1500	102.08	4614865	864679042	190	8	35	2	1.61854e-06
n3_15_TP53_PT_C	TRUE	TRUE	FALSE	TRUE	FALSE	FALSE	FALSE	FALSE	-	novaseq3	ACG|CGCC	Q5U				1500	143.88	4671886	988775990	214	8	42	2	1.88458e-06
n3_16_TP53_PT_mC	TRUE	TRUE	TRUE	TRUE	FALSE	FALSE	FALSE	FALSE	-	novaseq3	CACAC|G	Q5U				1500	80.08	5542626	1173368870	214	8	42	2	2.19403e-06
n3_21_TP53_D_POLE_WT_C	TRUE	FALSE	FALSE	FALSE	TRUE	FALSE	TRUE	TRUE	POLE WT	novaseq3	CT|ATGC	Q5U	n3_15_TP53_PT_C	n3_01_TP53_T_POLE_WT_C	n3_33_TP53_PD_C	3000	183.04	826583	184694987	225	8	62	2	1.15524e-05	5.87295e-06	8.4323e-06	1.42841e-06
n3_22_TP53_D_POLE_WT_mC	TRUE	FALSE	TRUE	FALSE	TRUE	FALSE	TRUE	TRUE	POLE WT	novaseq3	|GTACGT	Q5U	n3_16_TP53_PT_mC	n3_02_TP53_T_POLE_WT_mC	n3_33_TP53_PD_C	3000	222.2	1454625	322081449	225	8	62	2	1.67269e-05	1.0837e-05	4.12211e-05	2.60575e-06
n3_23_TP53_D_POLE_NULL_C	TRUE	FALSE	FALSE	FALSE	TRUE	FALSE	TRUE	TRUE	POLE NULL	novaseq3	GATG|CAT	Q5U	n3_15_TP53_PT_C	n3_03_TP53_T_POLE_NULL_C	n3_33_TP53_PD_C	3000	390	2644748	592263697	225	8	62	2	9.69515e-05	8.86564e-05	0.00012125	3.62366e-05
n3_24_TP53_D_POLE_NULL_mC	TRUE	FALSE	TRUE	FALSE	TRUE	FALSE	TRUE	TRUE	POLE NULL	novaseq3	ATC|TTC	Q5U	n3_16_TP53_PT_mC	n3_04_TP53_T_POLE_NULL_mC	n3_33_TP53_PD_C	3000	119.68	1641716	368341838	225	8	62	2	0.000116352	0.00010857	0.000203208	3.39767e-05
n3_25_TP53_D_POLE_P286R_C	TRUE	FALSE	FALSE	FALSE	TRUE	FALSE	TRUE	TRUE	POLE P286R	novaseq3	TACGTC|	Q5U	n3_15_TP53_PT_C	n3_05_TP53_T_POLE_P286R_C	n3_33_TP53_PD_C	3000	159.72	1205014	269264446	225	8	62	2	0.000336307	0.000326855	0.000572473	0.000201297
n3_26_TP53_D_POLE_P286R_mC	TRUE	FALSE	TRUE	FALSE	TRUE	FALSE	TRUE	TRUE	POLE P286R	novaseq3	AC|ACTT	Q5U	n3_16_TP53_PT_mC	n3_06_TP53_T_POLE_P286R_mC	n3_33_TP53_PD_C	3000	171.16	1867606	418612369	225	8	62	2	0.000351476	0.000343067	0.000811405	0.000219867
n3_29_TP53_D_KLENOW_NULL_C	TRUE	FALSE	FALSE	FALSE	TRUE	FALSE	TRUE	FALSE	KLENOW NULL	novaseq3	ACGTA|A	Q5U	n3_15_TP53_PT_C	n3_09_TP53_T_KLENOW_NULL_C	n3_33_TP53_PD_C	3000	121.88	3252430	718317674	225	8	62	2	0.000121663	9.56872e-05	2.1927e-05	9.51789e-06
n3_30_TP53_D_KLENOW_NULL_mC	TRUE	FALSE	TRUE	FALSE	TRUE	FALSE	TRUE	FALSE	KLENOW NULL	novaseq3	TTATGA|	Q5U	n3_16_TP53_PT_mC	n3_10_TP53_T_KLENOW_NULL_mC	n3_33_TP53_PD_C	3000	179.52	3359580	743222051	225	8	62	2	0.000124493	0.000100205	3.48103e-05	1.06969e-05
n3_31_TP53_D_KAPA_U_C	TRUE	FALSE	FALSE	FALSE	TRUE	FALSE	TRUE	FALSE	KAPA U+	novaseq3	ACG|TGA	Q5U	n3_15_TP53_PT_C	n3_11_TP53_T_KAPA_U_C	n3_33_TP53_PD_C	3000	183.48	3232399	722506165	225	8	62	2	5.8614e-06	1.52224e-06	2.00243e-06	3.3474e-07
n3_32_TP53_D_KAPA_U_mC	TRUE	FALSE	TRUE	FALSE	TRUE	FALSE	TRUE	FALSE	KAPA U+	novaseq3	ACGT|CT	Q5U	n3_16_TP53_PT_mC	n3_12_TP53_T_KAPA_U_mC	n3_33_TP53_PD_C	3000	157.08	4919613	1100628060	225	8	62	2	5.7847e-06	1.13405e-06	0	0
n3_33_TP53_PD_C	TRUE	FALSE	FALSE	TRUE	FALSE	FALSE	FALSE	FALSE	-	novaseq3	CGTA|GC	Q5U				1500	351	3223739	720187861	225	8	62	2	3.4052e-06
n3_34_TP53_PD_mC	TRUE	FALSE	TRUE	TRUE	FALSE	FALSE	FALSE	FALSE	-	novaseq3	GATG|TG	Q5U				1500	474.5	5687374	1270152708	225	8	62	2	3.48937e-06
n4_01_TP53_T_POLE_WT_C	TRUE	TRUE	FALSE	FALSE	TRUE	TRUE	FALSE	TRUE	POLE WT	novaseq4	G|TCCGA	Q5U	n4_16_TP53_PT_C			3000	36.96	6340708	1339466512	214	8	42	2	5.10408e-06	3.04977e-06	1.60282e-07	2.20476e-08
n4_02_TP53_T_POLE_WT_mC	TRUE	TRUE	TRUE	FALSE	TRUE	TRUE	FALSE	TRUE	POLE WT	novaseq4	TT|CGCC	Q5U	n4_17_TP53_PT_mC			3000	46.56	6520236	1372978018	214	8	42	2	5.91951e-06	3.73841e-06	2.20088e-08	5.59182e-08
n4_03_TP53_T_POLE_NULL_C	TRUE	TRUE	FALSE	FALSE	TRUE	TRUE	FALSE	TRUE	POLE NULL	novaseq4	TAA|ACA	Q5U	n4_16_TP53_PT_C			3000	51.36	866484	183569017	214	8	42	2	8.57331e-06	6.48034e-06	4.40682e-06	2.59992e-06
n4_04_TP53_T_POLE_NULL_mC	TRUE	TRUE	TRUE	FALSE	TRUE	TRUE	FALSE	TRUE	POLE NULL	novaseq4	AC|CGTA	Q5U	n4_17_TP53_PT_mC			3000	40.08	3115099	662209367	214	8	42	2	7.82922e-06	5.59754e-06	1.10172e-06	3.88197e-07
n4_05_TP53_T_POLE_P286R_C	TRUE	TRUE	FALSE	FALSE	TRUE	TRUE	FALSE	TRUE	POLE P286R	novaseq4	A|TACTT	Q5U	n4_16_TP53_PT_C			3000	53.52	2020417	430941062	214	8	42	2	7.7439e-06	5.6398e-06	3.49773e-06	1.72123e-06
n4_06_TP53_T_POLE_P286R_mC	TRUE	TRUE	TRUE	FALSE	TRUE	TRUE	FALSE	TRUE	POLE P286R	novaseq4	ACGTAC|	Q5U	n4_17_TP53_PT_mC			3000	52.08	3491408	745040450	214	8	42	2	7.91244e-06	5.68094e-06	7.46517e-07	6.95994e-07
n4_07_TP53_T_KLENOW_NULL_C	TRUE	TRUE	FALSE	FALSE	TRUE	TRUE	FALSE	FALSE	KLENOW NULL	novaseq4	CTTG|CA	Q5U	n4_16_TP53_PT_C			3000	45.6	4864318	1020040056	214	8	42	2	5.35729e-06	3.30141e-06	4.33464e-08	2.19593e-08
n4_08_TP53_T_KLENOW_NULL_mC	TRUE	TRUE	TRUE	FALSE	TRUE	TRUE	FALSE	FALSE	KLENOW NULL	novaseq4	CGAC|AC	Q5U	n4_17_TP53_PT_mC			3000	36.96	2628641	547795488	214	8	42	2	6.0736e-06	3.90211e-06	0	3.25264e-08
n4_09_TP53_T_KAPA_U_C	TRUE	TRUE	FALSE	FALSE	TRUE	TRUE	FALSE	FALSE	KAPA U+	novaseq4	ACGT|AGTTA	Q5U	n4_16_TP53_PT_C			3000	54	1248619	266660884	214	8	42	2	6.10818e-06	4.07881e-06	1.87829e-06	5.92852e-07
n4_10_TP53_T_KAPA_U_mC	TRUE	TRUE	TRUE	FALSE	TRUE	TRUE	FALSE	FALSE	KAPA U+	novaseq4	CCG|TTA	Q5U	n4_17_TP53_PT_mC			3000	41.04	140039	29068729	214	8	42	2	4.99538e-06	3.16587e-06	0	2.28287e-06
n4_12_TP53_PT_C_art7a	TRUE	TRUE	FALSE	TRUE	FALSE	FALSE	FALSE	FALSE	-	novaseq4	CGCGG|C	Q5U				1500	71.04	4349064	815317019	190	8	35	2	1.61619e-06
n4_13_TP53_PT_C_art7a_2	TRUE	TRUE	FALSE	TRUE	FALSE	FALSE	FALSE	FALSE	-	novaseq4	CGCGG|TTAACA	Q5U				3000	30.96	1333414	250537885	190	8	35	2	2.38467e-06
n4_14_TP53_PT_C_art7b	TRUE	TRUE	FALSE	TRUE	FALSE	FALSE	FALSE	FALSE	-	novaseq4	|C	Q5U				3000	29.04	5667477	1063239056	190	8	35	2	1.67143e-06
n4_15_TP53_PT_C_art7c	TRUE	TRUE	FALSE	TRUE	FALSE	FALSE	FALSE	FALSE	-	novaseq4	|TTA	Q5U				3000	28.56	914028	171629004	190	8	35	2	2.25641e-06
n4_16_TP53_PT_C	TRUE	TRUE	FALSE	TRUE	FALSE	FALSE	FALSE	FALSE	-	novaseq4	GGCTCA|GATAA	Q5U				3000	47.76	1379797	290997205	214	8	42	2	2.12166e-06
n4_17_TP53_PT_mC	TRUE	TRUE	TRUE	TRUE	FALSE	FALSE	FALSE	FALSE	-	novaseq4	CACAC|GCTT	Q5U				3000	39.6	2068815	437973762	214	8	42	2	2.24161e-06
n4_26_TP53_D_POLE_WT_C	TRUE	FALSE	FALSE	FALSE	TRUE	FALSE	TRUE	TRUE	POLE WT	novaseq4	CT|ATGC	Q5U	n4_16_TP53_PT_C	n4_01_TP53_T_POLE_WT_C	n4_37_TP53_PD_C	3000	47.16	867198	193745029	225	8	62	2	1.60331e-05	1.01695e-05	1.45797e-05	6.76004e-06
n4_27_TP53_D_POLE_WT_mC	TRUE	FALSE	TRUE	FALSE	TRUE	FALSE	TRUE	TRUE	POLE WT	novaseq4	|GTACGT	Q5U	n4_17_TP53_PT_mC	n4_02_TP53_T_POLE_WT_mC	n4_37_TP53_PD_C	3000	52.56	942158	209678404	225	8	62	2	2.0602e-05	1.40626e-05	4.92324e-05	8.93633e-06
n4_29_TP53_D_POLE_NULL_C	TRUE	FALSE	FALSE	FALSE	TRUE	FALSE	TRUE	TRUE	POLE NULL	novaseq4	ATC|TTC	Q5U	n4_16_TP53_PT_C	n4_03_TP53_T_POLE_NULL_C	n4_37_TP53_PD_C	3000	55.2	1165398	261330687	225	8	62	2	0.000154513	0.000144254	0.000239977	7.63039e-05
n4_30_TP53_D_POLE_NULL_mC	TRUE	FALSE	TRUE	FALSE	TRUE	FALSE	TRUE	TRUE	POLE NULL	novaseq4	TACGTC|	Q5U	n4_17_TP53_PT_mC	n4_04_TP53_T_POLE_NULL_mC	n4_37_TP53_PD_C	3000	39.84	776856	173153275	225	8	62	2	0.000168022	0.000158683	0.000388531	7.92722e-05
n4_31_TP53_D_POLE_P286R_C	TRUE	FALSE	FALSE	FALSE	TRUE	FALSE	TRUE	TRUE	POLE P286R	novaseq4	AC|ACTT	Q5U	n4_16_TP53_PT_C	n4_05_TP53_T_POLE_P286R_C	n4_37_TP53_PD_C	3000	57.84	772413	172495081	225	8	62	2	0.000177779	0.000168392	0.000299832	0.000100658
n4_32_TP53_D_POLE_P286R_mC	TRUE	FALSE	TRUE	FALSE	TRUE	FALSE	TRUE	TRUE	POLE P286R	novaseq4	C|CCCTA	Q5U	n4_17_TP53_PT_mC	n4_06_TP53_T_POLE_P286R_mC	n4_37_TP53_PD_C	3000	36.48	800944	178792626	225	8	62	2	0.000208096	0.000198609	0.000492388	0.000122226
n4_33_TP53_D_KLENOW_NULL_C	TRUE	FALSE	FALSE	FALSE	TRUE	FALSE	TRUE	FALSE	KLENOW NULL	novaseq4	GCACG|A	Q5U	n4_16_TP53_PT_C	n4_07_TP53_T_KLENOW_NULL_C	n4_37_TP53_PD_C	3000	38.64	1344637	300271076	225	8	62	2	7.57138e-05	6.93625e-05	1.80084e-05	1.19979e-05
n4_34_TP53_D_KLENOW_NULL_mC	TRUE	FALSE	TRUE	FALSE	TRUE	FALSE	TRUE	FALSE	KLENOW NULL	novaseq4	TT|GAAG	Q5U	n4_17_TP53_PT_mC	n4_08_TP53_T_KLENOW_NULL_mC	n4_37_TP53_PD_C	3000	48.24	2887306	642403816	225	8	62	2	6.79001e-05	6.13178e-05	2.52566e-05	9.80615e-06
n4_35_TP53_D_KAPA_U_C	TRUE	FALSE	FALSE	FALSE	TRUE	FALSE	TRUE	FALSE	KAPA U+	novaseq4	TTATGA|	Q5U	n4_16_TP53_PT_C	n4_09_TP53_T_KAPA_U_C	n4_37_TP53_PD_C	3000	40.8	497066	110650133	225	8	62	2	6.85355e-06	1.62742e-06	1.09589e-07	1.51976e-06
n4_36_TP53_D_KAPA_U_mC	TRUE	FALSE	TRUE	FALSE	TRUE	FALSE	TRUE	FALSE	KAPA U+	novaseq4	|TAGACG	Q5U	n4_17_TP53_PT_mC	n4_10_TP53_T_KAPA_U_mC	n4_37_TP53_PD_C	3000	55.2	2356887	527553871	225	8	62	2	6.35833e-06	1.78152e-06	1.09477e-05	2.36292e-06
n4_37_TP53_PD_C	TRUE	FALSE	FALSE	TRUE	FALSE	FALSE	FALSE	FALSE	-	novaseq4	TGTCT|G	Q5U				1500	65.76	1410626	315363438	225	8	62	2	3.97976e-06
n4_38_TP53_PD_mC	TRUE	FALSE	TRUE	TRUE	FALSE	FALSE	FALSE	FALSE	-	novaseq4	|CGTGAA	Q5U				1500	35.16	533195	117836548	225	8	62	2	3.32021e-06
n5_01_TP53_T_KLENOW_NULL_C	TRUE	TRUE	FALSE	FALSE	TRUE	TRUE	FALSE	FALSE	KLENOW NULL	novaseq5	G|TCCGA	Q5U	n5_05_TP53_PT_C			3000	37.44	1245123	257251840	214	8	42	2	5.28227e-06	1.21356e-06	6.06634e-07	1.37089e-07
n5_02_TP53_T_KLENOW_NULL_mC	TRUE	TRUE	TRUE	FALSE	TRUE	TRUE	FALSE	FALSE	KLENOW NULL	novaseq5	TT|CGCC	Q5U	n5_06_TP53_PT_mC			3000	52.56	1856509	382252657	214	8	42	2	7.59691e-06	2.86134e-06	3.88459e-06	5.53684e-06
n5_03_TP53_T_KAPA_U_C	TRUE	TRUE	FALSE	FALSE	TRUE	TRUE	FALSE	FALSE	KAPA U+	novaseq5	TAA|ACA	Q5U	n5_05_TP53_PT_C			3000	34.08	1064514	221259787	214	8	42	2	5.2617e-06	1.18253e-06	4.45917e-07	7.57238e-08
n5_04_TP53_T_KAPA_U_mC	TRUE	TRUE	TRUE	FALSE	TRUE	TRUE	FALSE	FALSE	KAPA U+	novaseq5	AC|CGTA	Q5U	n5_06_TP53_PT_mC			3000	46.08	1136657	237508401	214	8	42	2	7.79546e-06	3.13843e-06	4.31807e-06	4.21355e-06
n5_05_TP53_PT_C	TRUE	TRUE	FALSE	TRUE	FALSE	FALSE	FALSE	FALSE	-	novaseq5	A|TACTT	Q5U				1500	28.8	480885	98591135	214	8	42	2	8.45009e-06
n5_06_TP53_PT_mC	TRUE	TRUE	TRUE	TRUE	FALSE	FALSE	FALSE	FALSE	-	novaseq5	ACGTAC|	Q5U				1500	51.6	2488731	521526444	214	8	42	2	7.01815e-06
n5_07_TP53_PT_artMut_mixA	TRUE	TRUE	FALSE	TRUE	FALSE	FALSE	FALSE	FALSE	-	novaseq5	CTTG|CA	Q5U				1500	33.84	3187142	591554400	190	8	35	2	9.97205e-06
n5_08_TP53_PT_artMut_mixB	TRUE	TRUE	FALSE	TRUE	FALSE	FALSE	FALSE	FALSE	-	novaseq5	CGAC|AC	Q5U				1500	40.32	1391855	257661139	190	8	35	2	9.91636e-06
n5_27_TP53_D_KLENOW_NULL_C	TRUE	FALSE	FALSE	FALSE	TRUE	FALSE	TRUE	FALSE	KLENOW NULL	novaseq5	CT|ATGC	Q5U	n5_05_TP53_PT_C	n5_01_TP53_T_KLENOW_NULL_C	n5_31_TP53_PD_C	3000	49.92	2681230	592039415	225	8	62	2	7.99344e-05	7.18991e-05	1.41427e-05	5.99704e-06
n5_28_TP53_D_KLENOW_NULL_mC	TRUE	FALSE	TRUE	FALSE	TRUE	FALSE	TRUE	FALSE	KLENOW NULL	novaseq5	|GTACGT	Q5U	n5_06_TP53_PT_mC	n5_02_TP53_T_KLENOW_NULL_mC	n5_31_TP53_PD_C	3000	42	2205934	484524350	225	8	62	2	8.56163e-05	7.53396e-05	3.23437e-05	8.4034e-06
n5_29_TP53_D_KAPA_U_C	TRUE	FALSE	FALSE	FALSE	TRUE	FALSE	TRUE	FALSE	KAPA U+	novaseq5	A|TACTG	Q5U	n5_05_TP53_PT_C	n5_03_TP53_T_KAPA_U_C	n5_31_TP53_PD_C	3000	53.52	1711520	376398031	225	8	62	2	5.5929e-06	5.26467e-07	4.18131e-07	0
n5_30_TP53_D_KAPA_U_mC	TRUE	FALSE	TRUE	FALSE	TRUE	FALSE	TRUE	FALSE	KAPA U+	novaseq5	ATC|TTC	Q5U	n5_06_TP53_PT_mC	n5_04_TP53_T_KAPA_U_mC	n5_31_TP53_PD_C	3000	42	1529035	337918982	225	8	62	2	8.23169e-06	1.73565e-06	2.01715e-06	3.1004e-07
n5_31_TP53_PD_C	TRUE	FALSE	FALSE	TRUE	FALSE	FALSE	FALSE	FALSE	-	novaseq5	TACGTC|	Q5U				1500	53.28	345198	72847869	225	8	62	2	1.27435e-05
n5_32_TP53_PD_mC	TRUE	FALSE	TRUE	TRUE	FALSE	FALSE	FALSE	FALSE	-	novaseq5	AC|ACTT	Q5U				1500	47.04	1697365	374632443	225	8	62	2	7.58511e-06
n5_33_TP53_PD_artMut_mixA	TRUE	FALSE	FALSE	TRUE	FALSE	FALSE	FALSE	FALSE	-	novaseq5	C|CCCTA	Q5U				1500	55.68	755270	147081470	201	8	55	2	1.21611e-05
n5_34_TP53_PD_artMut_mixB	TRUE	FALSE	FALSE	TRUE	FALSE	FALSE	FALSE	FALSE	-	novaseq5	GCACG|A	Q5U				1500	73.2	520154	99493304	201	8	55	2	1.78925e-05

## Sheet: Table4
name	polymerase	isMethylated	C>A [ACA]	C>A [ACC]	C>A [ACG]	C>A [ACT]	C>A [CCA]	C>A [CCC]	C>A [CCG]	C>A [CCT]	C>A [GCA]	C>A [GCC]	C>A [GCG]	C>A [GCT]	C>A [TCA]	C>A [TCC]	C>A [TCG]	C>A [TCT]	C>G [ACA]	C>G [ACC]	C>G [ACG]	C>G [ACT]	C>G [CCA]	C>G [CCC]	C>G [CCG]	C>G [CCT]	C>G [GCA]	C>G [GCC]	C>G [GCG]	C>G [GCT]	C>G [TCA]	C>G [TCC]	C>G [TCG]	C>G [TCT]	C>T [ACA]	C>T [ACC]	C>T [ACG]	C>T [ACT]	C>T [CCA]	C>T [CCC]	C>T [CCG]	C>T [CCT]	C>T [GCA]	C>T [GCC]	C>T [GCG]	C>T [GCT]	C>T [TCA]	C>T [TCC]	C>T [TCG]
KLENOW NULL | methylated	KLENOW NULL	FALSE	6.16102e-06	1.3465e-06	2.47681e-06	1.23747e-06	1.14688e-06	2.10083e-06	2.24741e-06	2.53463e-07	2.06941e-06	3.24749e-06	2.9316e-06	9.24682e-07	1.45537e-06	1.00364e-06	4.95566e-08	7.28118e-07	1.33303e-06	1.97568e-06	1.56119e-06	1.25173e-06	3.27513e-06	3.00821e-06	1.75592e-06	1.67061e-06	2.89787e-06	5.10105e-06	5.83985e-06	2.93812e-06	1.16028e-06	1.26343e-06	3.98811e-07	1.36666e-06	1.095e-05	4.8348e-06	7.1683e-06	1.4841e-06	8.13709e-06	1.02531e-05	6.33336e-06	5.27868e-06	7.61807e-06	4.92788e-06	1.0029e-05	2.7129e-06	2.76085e-06	5.62218e-06	1.58867e-05
KLENOW NULL | methylated	KLENOW NULL	TRUE	4.75538e-06	1.78498e-06	2.31141e-06	1.28198e-06	2.90168e-06	4.08823e-06	3.51068e-06	2.03707e-06	2.48009e-06	4.12723e-06	2.21146e-06	1.40856e-06	1.56766e-06	1.20424e-06	1.54753e-07	3.89478e-06	1.28827e-06	1.62054e-06	1.37001e-06	1.11327e-06	2.68673e-06	2.78302e-06	1.04261e-06	1.59651e-06	3.72359e-06	4.58772e-06	4.59596e-06	2.794e-06	1.03062e-06	1.18672e-06	1.66167e-07	1.25828e-06	1.47064e-05	5.08804e-06	1.40352e-05	2.93076e-06	9.94351e-06	1.21431e-05	9.44311e-06	4.65565e-06	8.61586e-06	4.5319e-06	1.76368e-05	3.371e-06	4.6257e-06	5.31395e-06	2.4694e-05
KAPA U+ | methylated	KAPA U+	FALSE	1.41764e-06	3.63141e-07	5.01467e-07	3.35711e-07	5.60679e-08	0	0	6.10464e-08	0	1.29345e-07	3.01885e-07	4.67695e-08	9.05017e-07	0	0	5.15848e-08	1.73281e-08	1.02123e-08	1.25993e-08	6.46051e-08	1.52219e-08	1.00972e-08	1.00587e-07	2.73603e-08	3.87038e-08	2.14501e-07	1.54026e-07	1.01912e-08	0	7.67042e-09	0	1.93336e-07	1.56284e-07	8.91516e-08	5.03067e-07	4.02605e-07	2.76425e-07	9.6034e-07	3.71031e-07	6.61516e-07	1.89415e-07	1.03106e-06	4.82389e-07	6.88587e-07	1.17943e-07	4.65544e-07	1.53542e-06
KAPA U+ | methylated	KAPA U+	TRUE	3.99749e-07	7.10806e-07	6.57094e-07	1.01465e-06	9.27936e-08	0	0	2.85795e-08	2.05418e-07	1.33589e-08	3.03579e-08	5.9267e-08	1.5357e-07	0	0	1.08408e-07	0	6.56232e-08	2.3363e-08	2.36652e-08	2.36609e-08	5.02432e-08	0	4.63873e-08	1.1092e-07	3.24697e-07	6.20756e-08	0	0	1.17311e-08	0	2.32251e-08	2.40826e-06	2.31406e-06	2.05435e-06	9.85067e-07	3.00186e-06	1.21021e-06	3.67658e-06	8.18772e-07	1.49688e-06	2.17139e-06	6.72807e-07	1.41815e-06	7.377e-07	6.82422e-07	4.40678e-06
POLE P286R | methylated	POLE P286R	FALSE	1.70914e-05	7.57249e-05	3.73804e-05	0.000256971	2.35706e-05	8.13212e-05	3.92286e-05	0.000290015	2.45328e-05	5.6176e-05	5.39371e-05	0.000250027	2.02511e-05	9.72338e-05	5.57693e-05	0.000280392	4.30502e-07	1.66698e-06	8.87824e-07	1.93979e-06	9.94269e-07	1.41279e-06	1.95983e-07	4.45984e-06	4.77229e-07	1.45245e-07	4.27376e-06	1.43498e-06	1.58818e-07	1.20864e-06	2.89826e-06	2.88281e-06	6.92481e-05	0.00012723	0.000266586	0.000125644	8.1404e-05	9.55668e-05	0.000206277	0.000116419	8.61906e-05	9.04531e-05	0.000307267	0.000129875	8.3502e-05	0.000104931	0.00030481
POLE P286R | methylated	POLE P286R	TRUE	1.82248e-05	8.18367e-05	2.25771e-05	0.000255128	2.13589e-05	8.44382e-05	2e-05	0.00030796	2.44674e-05	0.000137092	2.45927e-05	0.000276773	2.62749e-05	9.90584e-05	2.60966e-05	0.000287762	1.13129e-07	1.28221e-06	5.30698e-07	8.28889e-07	7.87393e-07	1.14818e-06	1.17209e-06	3.68868e-06	3.90228e-07	3.04731e-06	1.22507e-06	1.25799e-06	1.7134e-06	1.16863e-06	3.24307e-06	2.61323e-06	7.8775e-05	0.000130786	0.000428827	0.000115776	7.36745e-05	9.5453e-05	0.000243224	0.000121068	8.1338e-05	0.000152679	0.000408238	0.000130666	6.29815e-05	0.000107368	0.000453488
POLE NULL | methylated	POLE NULL	FALSE	7.20461e-06	3.08011e-05	1.13643e-05	0.000105983	1.06992e-05	4.10007e-05	2.2814e-05	0.000132161	1.07691e-05	2.54904e-05	2.52123e-05	0.000114991	1.00152e-05	4.20638e-05	1.99357e-05	0.000119397	8.41522e-07	5.96044e-07	1.01262e-06	1.65191e-06	2.58786e-07	8.3929e-07	4.85514e-07	1.73816e-06	2.72594e-07	2.5567e-07	1.87584e-06	7.4651e-07	5.93699e-07	6.20196e-07	1.25631e-06	1.82793e-06	2.18258e-05	5.02929e-05	9.88162e-05	4.34723e-05	3.21615e-05	4.14024e-05	0.000100663	4.64105e-05	2.95559e-05	4.05296e-05	0.000135355	4.49574e-05	2.32916e-05	3.78266e-05	0.000113408
POLE NULL | methylated	POLE NULL	TRUE	8.03124e-06	3.47921e-05	1.00361e-05	0.000108522	1.16853e-05	3.94535e-05	1.83333e-05	0.000128133	1.12038e-05	5.34429e-05	1.85158e-05	0.000112353	9.82722e-06	4.17352e-05	1.29117e-05	0.000113145	1.62052e-07	7.95753e-07	5.38298e-07	1.16273e-06	2.95253e-07	6.31832e-07	4.89787e-07	1.49594e-06	2.78534e-07	7.05884e-07	1.82364e-06	1.05409e-06	1.78117e-07	6.1744e-07	1.34236e-06	1.33334e-06	1.95613e-05	4.80923e-05	0.000185477	4.23165e-05	2.77398e-05	4.04022e-05	0.000130353	4.43773e-05	2.76138e-05	6.62442e-05	0.000224646	4.53106e-05	1.63297e-05	3.80659e-05	0.000184362
POLE WT | methylated	POLE WT	FALSE	3.0803e-06	2.78557e-06	2.20143e-06	6.64645e-06	2.30061e-06	3.1683e-06	2.75405e-06	1.22448e-05	2.37211e-06	2.45615e-06	4.2077e-06	6.10622e-06	2.21271e-06	2.12856e-06	1.37441e-06	1.03905e-05	1.48857e-07	1.20357e-07	1.42469e-07	2.33591e-07	1.25242e-07	1.18719e-07	0	2.79784e-07	1.27807e-07	4.30916e-07	2.2009e-08	1.05071e-07	1.7683e-07	9.44131e-08	7.59404e-08	2.25554e-07	1.58757e-06	3.30477e-06	5.80433e-06	3.71594e-06	2.61925e-06	3.65211e-06	4.10439e-06	4.04146e-06	1.07097e-06	5.28665e-06	1.39704e-05	3.22441e-06	2.20272e-06	2.33517e-06	8.17356e-06
POLE WT | methylated	POLE WT	TRUE	3.85867e-06	3.14178e-06	4.04266e-06	6.18677e-06	3.16685e-06	2.49812e-06	2.54383e-06	1.45859e-05	2.01075e-06	3.34086e-06	3.69476e-06	6.38207e-06	2.59863e-06	3.56314e-06	2.0518e-06	9.31721e-06	7.08317e-08	2.3192e-07	5.76832e-07	7.63963e-08	1.69359e-07	1.0253e-07	1.61355e-08	1.46634e-07	9.94129e-08	2.03046e-07	8.55297e-08	3.13887e-07	3.74147e-07	9.04735e-08	0	7.98452e-08	1.12941e-06	2.49694e-06	8.0681e-06	1.92322e-06	2.64649e-06	4.32064e-06	1.05289e-05	6.49304e-06	1.79627e-06	1.07619e-05	5.94034e-05	2.8751e-06	7.40915e-07	3.76259e-06	1.81192e-05
[truncated: 145 more columns]

## Sheet: Table5
sampleName	TISSUE	dataset	isWGS	group	variantPOLE	variantPOLD1	typeMMR	MMRd_gene	mod_MLH1	isHeritable_MMRd	icgc_donor_id	isPCAWG	patientName	isTCGA	nameTCGA	mut_NtoN_exome	mf_meanNtoN_exome	mf_meanNCGtoT_exome	mf_meanNotNCGtoT_exome	mut_NtoN_genome	mf_meanNtoN_genome	mf_meanNCGtoT_genome	mf_meanNotNCGtoT_genome
DO48360_B10-Tumor	bladder	ICGC_WXS_BLCA_CN	FALSE	PROF						FALSE	DO48360	0	B10-Tumor	FALSE		8.87917e-05	9.24914e-07	5.8182e-06	7.12162e-07	0.000103505
DO48361_B100-Tumor	bladder	ICGC_WXS_BLCA_CN	FALSE	PROF						FALSE	DO48361	0	B100-Tumor	FALSE		1.93855e-05	2.01933e-07	1.92765e-06	1.26902e-07	4.25491e-05
DO48362_B101-Tumor	bladder	ICGC_WXS_BLCA_CN	FALSE	PROF						FALSE	DO48362	0	B101-Tumor	FALSE		0.000130547	1.35986e-06	8.45792e-06	1.05125e-06	0.000144158
DO48363_B102-Tumor	bladder	ICGC_WXS_BLCA_CN	FALSE	PROF						FALSE	DO48363	0	B102-Tumor	FALSE		1.76716e-05	1.84079e-07	1.10544e-06	1.4402e-07	3.31862e-05
DO48364_B103-Tumor	bladder	ICGC_WXS_BLCA_CN	FALSE	PROF						FALSE	DO48364	0	B103-Tumor	FALSE		7.26951e-05	7.5724e-07	9.99556e-06	3.55574e-07	8.48577e-05
DO48365_B104-Tumor	bladder	ICGC_WXS_BLCA_CN	FALSE	PROF						FALSE	DO48365	0	B104-Tumor	FALSE		3.61626e-05	3.76694e-07	2.57673e-06	2.8104e-07	4.1709e-05
DO48366_B104-0-Tumor	bladder	ICGC_WXS_BLCA_CN	FALSE	PROF						FALSE	DO48366	0	B104-0-Tumor	FALSE		0.000262786	2.73735e-06	1.96548e-05	2.00181e-06	0.000272373
DO48367_B105-Tumor	bladder	ICGC_WXS_BLCA_CN	FALSE	PROF						FALSE	DO48367	0	B105-Tumor	FALSE		5.02027e-05	5.22945e-07	3.52828e-06	3.92278e-07	6.54805e-05
DO48368_B105-0-Tumor	bladder	ICGC_WXS_BLCA_CN	FALSE	PROF						FALSE	DO48368	0	B105-0-Tumor	FALSE		0.000221123	2.30337e-06	1.72823e-05	1.65211e-06	0.000239602
DO48369_B105-1-Tumor	bladder	ICGC_WXS_BLCA_CN	FALSE	PROF						FALSE	DO48369	0	B105-1-Tumor	FALSE		7.66464e-05	7.984e-07	4.83954e-06	6.22698e-07	9.08822e-05
DO48370_B106-Tumor	bladder	ICGC_WXS_BLCA_CN	FALSE	PROF						FALSE	DO48370	0	B106-Tumor	FALSE		0.000174866	1.82152e-06	1.18186e-05	1.38686e-06	0.000189235
DO48371_B107-Tumor	bladder	ICGC_WXS_BLCA_CN	FALSE	PROF						FALSE	DO48371	0	B107-Tumor	FALSE		4.39043e-05	4.57337e-07	2.62407e-06	3.63131e-07	6.14133e-05
DO48372_B109-Tumor	bladder	ICGC_WXS_BLCA_CN	FALSE	PROF						FALSE	DO48372	0	B109-Tumor	FALSE		0.000195286	2.03423e-06	1.65591e-05	1.40272e-06	0.000215329
DO48373_B11-Tumor	bladder	ICGC_WXS_BLCA_CN	FALSE	PROF						FALSE	DO48373	0	B11-Tumor	FALSE		1.24811e-05	1.30012e-07	6.61167e-07	1.06918e-07	2.39664e-05
DO48374_B110-Tumor	bladder	ICGC_WXS_BLCA_CN	FALSE	PROF						FALSE	DO48374	0	B110-Tumor	FALSE		9.25487e-05	9.64049e-07	5.77579e-06	7.54843e-07	0.000105666
DO48375_B111-Tumor	bladder	ICGC_WXS_BLCA_CN	FALSE	PROF						FALSE	DO48375	0	B111-Tumor	FALSE		9.17188e-05	9.55405e-07	8.11823e-06	6.43977e-07	9.47462e-05
DO48376_B112-Tumor	bladder	ICGC_WXS_BLCA_CN	FALSE	PROF						FALSE	DO48376	0	B112-Tumor	FALSE		6.53149e-05	6.80364e-07	8.34401e-06	3.47162e-07	7.50789e-05
DO48377_B114-Tumor	bladder	ICGC_WXS_BLCA_CN	FALSE	PROF						FALSE	DO48377	0	B114-Tumor	FALSE		4.41039e-05	4.59415e-07	3.5564e-06	3.24764e-07	6.50261e-05
DO48378_B13-Tumor	bladder	ICGC_WXS_BLCA_CN	FALSE	PROF						FALSE	DO48378	0	B13-Tumor	FALSE		4.73922e-05	4.93669e-07	3.88144e-06	3.46374e-07	6.09579e-05
DO48379_B14-Tumor	bladder	ICGC_WXS_BLCA_CN	FALSE	PROF						FALSE	DO48379	0	B14-Tumor	FALSE		4.15092e-05	4.32387e-07	5.44384e-06	2.14498e-07	4.56483e-05
DO48380_B15-Tumor	bladder	ICGC_WXS_BLCA_CN	FALSE	PROF						FALSE	DO48380	0	B15-Tumor	FALSE		8.49859e-05	8.8527e-07	5.85482e-06	6.69202e-07	9.19663e-05
DO48381_B16-Tumor	bladder	ICGC_WXS_BLCA_CN	FALSE	PROF						FALSE	DO48381	0	B16-Tumor	FALSE		5.72333e-05	5.9618e-07	6.64695e-06	3.33103e-07	7.26137e-05
DO48382_B18-Tumor	bladder	ICGC_WXS_BLCA_CN	FALSE	PROF						FALSE	DO48382	0	B18-Tumor	FALSE		4.65457e-05	4.84851e-07	3.03309e-06	3.74058e-07	5.57196e-05
DO48383_B19-Tumor	bladder	ICGC_WXS_BLCA_CN	FALSE	PROF						FALSE	DO48383	0	B19-Tumor	FALSE		1.69429e-05	1.76489e-07	4.88048e-07	1.62943e-07	3.74662e-05
DO48384_B21-Tumor	bladder	ICGC_WXS_BLCA_CN	FALSE	PROF						FALSE	DO48384	0	B21-Tumor	FALSE		7.1821e-05	7.48135e-07	6.51819e-06	4.97263e-07	8.94814e-05
DO48385_B22-Tumor	bladder	ICGC_WXS_BLCA_CN	FALSE	PROF						FALSE	DO48385	0	B22-Tumor	FALSE		0.000233761	2.43501e-06	1.4048e-05	1.9301e-06	0.000242685
DO48386_B23-Tumor	bladder	ICGC_WXS_BLCA_CN	FALSE	PROF						FALSE	DO48386	0	B23-Tumor	FALSE		0.000192963	2.01003e-06	1.01703e-05	1.65524e-06	0.000180066
DO48387_B24-Tumor	bladder	ICGC_WXS_BLCA_CN	FALSE	PROF						FALSE	DO48387	0	B24-Tumor	FALSE		6.67178e-05	6.94977e-07	1.00946e-05	2.86298e-07	8.93019e-05
DO48388_B25-Tumor	bladder	ICGC_WXS_BLCA_CN	FALSE	PROF						FALSE	DO48388	0	B25-Tumor	FALSE		5.39554e-05	5.62036e-07	1.72641e-06	5.11411e-07	5.9186e-05
DO48389_B34-Tumor	bladder	ICGC_WXS_BLCA_CN	FALSE	PROF						FALSE	DO48389	0	B34-Tumor	FALSE		0.000126331	1.31595e-06	9.0349e-06	9.80343e-07	0.00013358
DO48390_B35-Tumor	bladder	ICGC_WXS_BLCA_CN	FALSE	PROF						FALSE	DO48390	0	B35-Tumor	FALSE		8.96806e-05	9.34173e-07	7.41526e-06	6.52387e-07	0.000105295
DO48391_B37-Tumor	bladder	ICGC_WXS_BLCA_CN	FALSE	PROF						FALSE	DO48391	0	B37-Tumor	FALSE		0.000174779	1.82061e-06	1.49026e-05	1.25183e-06	0.000192459
DO48392_B41-Tumor	bladder	ICGC_WXS_BLCA_CN	FALSE	PROF						FALSE	DO48392	0	B41-Tumor	FALSE		1.59876e-05	1.66537e-07	0	1.73778e-07	3.24473e-05
DO48393_B43-Tumor	bladder	ICGC_WXS_BLCA_CN	FALSE	PROF						FALSE	DO48393	0	B43-Tumor	FALSE		1.87991e-05	1.95824e-07	2.14096e-06	1.11253e-07	2.83953e-05
DO48394_B45-Tumor	bladder	ICGC_WXS_BLCA_CN	FALSE	PROF						FALSE	DO48394	0	B45-Tumor	FALSE		5.39805e-05	5.62297e-07	7.40454e-06	2.64808e-07	7.39921e-05
DO48395_B47-Tumor	bladder	ICGC_WXS_BLCA_CN	FALSE	PROF						FALSE	DO48395	0	B47-Tumor	FALSE		0.000154682	1.61127e-06	1.2814e-05	1.1242e-06	0.000170913
DO48396_B5-Tumor	bladder	ICGC_WXS_BLCA_CN	FALSE	PROF						FALSE	DO48396	0	B5-Tumor	FALSE		9.55313e-05	9.95118e-07	7.41526e-06	7.15981e-07	0.000107011
DO48397_B50-Tumor	bladder	ICGC_WXS_BLCA_CN	FALSE	PROF						FALSE	DO48397	0	B50-Tumor	FALSE		2.16703e-05	2.25732e-07	1.7983e-06	1.5736e-07	3.22734e-05
DO48398_B52-Tumor	bladder	ICGC_WXS_BLCA_CN	FALSE	PROF						FALSE	DO48398	0	B52-Tumor	FALSE		0.000159238	1.65872e-06	1.15827e-05	1.22725e-06	0.000159154
DO48399_B54-Tumor	bladder	ICGC_WXS_BLCA_CN	FALSE	PROF						FALSE	DO48399	0	B54-Tumor	FALSE		4.27783e-05	4.45607e-07	3.07686e-06	3.31205e-07	4.29686e-05
DO48400_B55-Tumor	bladder	ICGC_WXS_BLCA_CN	FALSE	PROF						FALSE	DO48400	0	B55-Tumor	FALSE		4.90115e-05	5.10537e-07	4.46417e-06	3.3864e-07	6.09452e-05
DO48401_B56-Tumor	bladder	ICGC_WXS_BLCA_CN	FALSE	PROF						FALSE	DO48401	0	B56-Tumor	FALSE		4.33698e-05	4.51769e-07	3.78537e-06	3.0683e-07	6.44156e-05
DO48402_B57-Tumor	bladder	ICGC_WXS_BLCA_CN	FALSE	PROF						FALSE	DO48402	0	B57-Tumor	FALSE		6.46458e-05	6.73394e-07	5.19366e-06	4.76861e-07	8.48224e-05
DO48403_B58-Tumor	bladder	ICGC_WXS_BLCA_CN	FALSE	PROF						FALSE	DO48403	0	B58-Tumor	FALSE		1.46688e-05	1.528e-07	1.72284e-06	8.45374e-08	2.25799e-05
DO48404_B59-Tumor	bladder	ICGC_WXS_BLCA_CN	FALSE	PROF						FALSE	DO48404	0	B59-Tumor	FALSE		0.000128399	1.33749e-06	1.1507e-05	8.95332e-07	0.000143982
DO48405_B59-0-Tumor	bladder	ICGC_WXS_BLCA_CN	FALSE	PROF						FALSE	DO48405	0	B59-0-Tumor	FALSE		2.63657e-05	2.74643e-07	2.58881e-06	1.74026e-07	2.7725e-05
DO48406_B59-1-Tumor	bladder	ICGC_WXS_BLCA_CN	FALSE	PROF						FALSE	DO48406	0	B59-1-Tumor	FALSE		2.34277e-05	2.44038e-07	3.1977e-06	1.15618e-07	3.33787e-05
DO48407_B59-3-Tumor	bladder	ICGC_WXS_BLCA_CN	FALSE	PROF						FALSE	DO48407	0	B59-3-Tumor	FALSE		0.000118682	1.23627e-06	9.45523e-06	8.78923e-07	0.000134744
DO48408_B60-Tumor	bladder	ICGC_WXS_BLCA_CN	FALSE	PROF						FALSE	DO48408	0	B60-Tumor	FALSE		0.000145754	1.51827e-06	1.00289e-05	1.14824e-06	0.000153977
DO48409_B61-Tumor	bladder	ICGC_WXS_BLCA_CN	FALSE	PROF						FALSE	DO48409	0	B61-Tumor	FALSE		7.37773e-05	7.68514e-07	7.28728e-06	4.85089e-07	9.61012e-05
DO48410_B62-0-Tumor	bladder	ICGC_WXS_BLCA_CN	FALSE	PROF						FALSE	DO48410	0	B62-0-Tumor	FALSE		3.23864e-05	3.37359e-07	3.57503e-06	1.9659e-07	4.63385e-05
DO48411_B63-Tumor	bladder	ICGC_WXS_BLCA_CN	FALSE	PROF						FALSE	DO48411	0	B63-Tumor	FALSE		0.000119888	1.24884e-06	9.6592e-06	8.83169e-07	0.000134962
DO48412_B64-Tumor	bladder	ICGC_WXS_BLCA_CN	FALSE	PROF						FALSE	DO48412	0	B64-Tumor	FALSE		5.2617e-05	5.48094e-07	2.85997e-06	4.47578e-07	6.37776e-05
DO48413_B65-Tumor	bladder	ICGC_WXS_BLCA_CN	FALSE	PROF						FALSE	DO48413	0	B65-Tumor	FALSE		0.000253822	2.64398e-06	1.48925e-05	2.11143e-06	0.000268735
DO48414_B66-Tumor	bladder	ICGC_WXS_BLCA_CN	FALSE	PROF						FALSE	DO48414	0	B66-Tumor	FALSE		0.000302277	3.14872e-06	2.12979e-05	2.35962e-06	0.000324187
DO48415_B66-0-Tumor	bladder	ICGC_WXS_BLCA_CN	FALSE	PROF						FALSE	DO48415	0	B66-0-Tumor	FALSE		2.45313e-05	2.55535e-07	3.39179e-06	1.19176e-07	3.11021e-05
DO48416_B68-Tumor	bladder	ICGC_WXS_BLCA_CN	FALSE	PROF						FALSE	DO48416	0	B68-Tumor	FALSE		6.06596e-05	6.31871e-07	3.59302e-06	5.03125e-07	6.99865e-05
DO48417_B70-Tumor	bladder	ICGC_WXS_BLCA_CN	FALSE	PROF						FALSE	DO48417	0	B70-Tumor	FALSE		0.000150787	1.5707e-06	1.4805e-05	9.95297e-07	0.0001594
DO48418_B71-Tumor	bladder	ICGC_WXS_BLCA_CN	FALSE	PROF						FALSE	DO48418	0	B71-Tumor	FALSE		0.000117553	1.22451e-06	9.53366e-06	8.63242e-07	0.000129528
DO48419_B73-Tumor	bladder	ICGC_WXS_BLCA_CN	FALSE	PROF						FALSE	DO48419	0	B73-Tumor	FALSE		2.13804e-05	2.22713e-07	2.86812e-07	2.19926e-07	2.94154e-05
DO48420_B74-Tumor	bladder	ICGC_WXS_BLCA_CN	FALSE	PROF						FALSE	DO48420	0	B74-Tumor	FALSE		9.96921e-05	1.03846e-06	6.92227e-06	7.82641e-07	0.000119742
DO48421_B77-Tumor	bladder	ICGC_WXS_BLCA_CN	FALSE	PROF						FALSE	DO48421	0	B77-Tumor	FALSE		7.04094e-05	7.33431e-07	3.52471e-06	6.12071e-07	9.08358e-05
DO48422_B78-Tumor	bladder	ICGC_WXS_BLCA_CN	FALSE	PROF						FALSE	DO48422	0	B78-Tumor	FALSE		9.90808e-05	1.03209e-06	5.78157e-06	8.25593e-07	0.000119524
DO48423_B79-Tumor	bladder	ICGC_WXS_BLCA_CN	FALSE	PROF						FALSE	DO48423	0	B79-Tumor	FALSE		6.06755e-05	6.32036e-07	6.03312e-06	3.97206e-07	6.546e-05
DO48424_B80-Tumor	bladder	ICGC_WXS_BLCA_CN	FALSE	PROF						FALSE	DO48424	0	B80-Tumor	FALSE		0.000235192	2.44991e-06	1.18759e-05	2.04009e-06	0.000245965
DO48425_B80-0-Tumor	bladder	ICGC_WXS_BLCA_CN	FALSE	PROF						FALSE	DO48425	0	B80-0-Tumor	FALSE		0.000122276	1.27371e-06	1.32129e-05	7.54617e-07	0.000132318
DO48426_B80-1-Tumor	bladder	ICGC_WXS_BLCA_CN	FALSE	PROF						FALSE	DO48426	0	B80-1-Tumor	FALSE		3.65749e-05	3.80989e-07	3.40548e-06	2.49489e-07	5.05222e-05
DO48427_B80-11-Tumor	bladder	ICGC_WXS_BLCA_CN	FALSE	PROF						FALSE	DO48427	0	B80-11-Tumor	FALSE		1.40105e-05	1.45943e-07	1.06524e-06	1.05973e-07	1.72804e-05
DO48428_B80-13-Tumor	bladder	ICGC_WXS_BLCA_CN	FALSE	PROF						FALSE	DO48428	0	B80-13-Tumor	FALSE		7.36375e-05	7.67057e-07	4.17736e-06	6.18783e-07	7.4632e-05
DO48429_B80-3-Tumor	bladder	ICGC_WXS_BLCA_CN	FALSE	PROF						FALSE	DO48429	0	B80-3-Tumor	FALSE		7.07766e-05	7.37256e-07	4.71436e-06	5.64339e-07	8.28935e-05
DO48430_B80-4-Tumor	bladder	ICGC_WXS_BLCA_CN	FALSE	PROF						FALSE	DO48430	0	B80-4-Tumor	FALSE		1.86948e-05	1.94738e-07	1.15279e-06	1.53083e-07	2.28486e-05
DO48431_B80-5-Tumor	bladder	ICGC_WXS_BLCA_CN	FALSE	PROF						FALSE	DO48431	0	B80-5-Tumor	FALSE		0.000104489	1.08842e-06	8.75821e-06	7.54956e-07	0.00011417
DO48432_B80-7-Tumor	bladder	ICGC_WXS_BLCA_CN	FALSE	PROF						FALSE	DO48432	0	B80-7-Tumor	FALSE		2.28428e-05	2.37945e-07	2.65873e-06	1.32694e-07	3.71012e-05
DO48433_B80-8-Tumor	bladder	ICGC_WXS_BLCA_CN	FALSE	PROF						FALSE	DO48433	0	B80-8-Tumor	FALSE		4.50719e-05	4.69499e-07	1.77018e-06	4.12948e-07	5.20324e-05
DO48434_B81-Tumor	bladder	ICGC_WXS_BLCA_CN	FALSE	PROF						FALSE	DO48434	0	B81-Tumor	FALSE		2.97457e-05	3.09851e-07	1.4396e-06	2.60731e-07	4.29692e-05
DO48435_B81-1-Tumor	bladder	ICGC_WXS_BLCA_CN	FALSE	PROF						FALSE	DO48435	0	B81-1-Tumor	FALSE		6.58424e-05	6.85859e-07	7.17222e-06	4.03843e-07	7.78519e-05
DO48436_B81-2-Tumor	bladder	ICGC_WXS_BLCA_CN	FALSE	PROF						FALSE	DO48436	0	B81-2-Tumor	FALSE		7.29876e-05	7.60288e-07	7.16472e-06	4.81834e-07	8.33152e-05
DO48437_B82-Tumor	bladder	ICGC_WXS_BLCA_CN	FALSE	PROF						FALSE	DO48437	0	B82-Tumor	FALSE		6.77378e-05	7.05602e-07	4.41326e-06	5.44399e-07	7.91834e-05
DO48438_B83-Tumor	bladder	ICGC_WXS_BLCA_CN	FALSE	PROF						FALSE	DO48438	0	B83-Tumor	FALSE		0.000115757	1.2058e-06	7.90551e-06	9.14508e-07	0.000117313
DO48439_B84-Tumor	bladder	ICGC_WXS_BLCA_CN	FALSE	PROF						FALSE	DO48439	0	B84-Tumor	FALSE		7.20047e-05	7.50049e-07	3.93236e-06	6.11688e-07	7.88847e-05
DO48440_B85-0-Tumor	bladder	ICGC_WXS_BLCA_CN	FALSE	PROF						FALSE	DO48440	0	B85-0-Tumor	FALSE		0.000140221	1.46064e-06	1.03873e-05	1.07252e-06	0.000149096
DO48441_B85-2-Tumor	bladder	ICGC_WXS_BLCA_CN	FALSE	PROF						FALSE	DO48441	0	B85-2-Tumor	FALSE		3.66999e-05	3.8229e-07	1.93973e-06	3.14576e-07	4.80187e-05
DO48442_B86-Tumor	bladder	ICGC_WXS_BLCA_CN	FALSE	PROF						FALSE	DO48442	0	B86-Tumor	FALSE		0.00033545	3.49427e-06	2.52019e-05	2.55046e-06	0.000352282
DO48443_B87-Tumor	bladder	ICGC_WXS_BLCA_CN	FALSE	PROF						FALSE	DO48443	0	B87-Tumor	FALSE		1.96163e-05	2.04336e-07	4.91619e-07	1.91846e-07	2.89903e-05
DO48444_B88-Tumor	bladder	ICGC_WXS_BLCA_CN	FALSE	PROF						FALSE	DO48444	0	B88-Tumor	FALSE		7.11049e-05	7.40676e-07	6.13312e-06	5.06222e-07	7.96286e-05
DO48445_B89-1-Tumor	bladder	ICGC_WXS_BLCA_CN	FALSE	PROF						FALSE	DO48445	0	B89-1-Tumor	FALSE		5.04099e-05	5.25103e-07	6.29059e-06	2.7443e-07	6.26734e-05
DO48446_B89-10-Tumor	bladder	ICGC_WXS_BLCA_CN	FALSE	PROF						FALSE	DO48446	0	B89-10-Tumor	FALSE		7.02385e-05	7.31651e-07	7.17085e-06	4.51686e-07	8.33193e-05
DO48447_B89-11-Tumor	bladder	ICGC_WXS_BLCA_CN	FALSE	PROF						FALSE	DO48447	0	B89-11-Tumor	FALSE		1.72052e-05	1.7922e-07	1.31025e-06	1.30045e-07	2.60994e-05
DO48448_B89-12-Tumor	bladder	ICGC_WXS_BLCA_CN	FALSE	PROF						FALSE	DO48448	0	B89-12-Tumor	FALSE		0.000178911	1.86366e-06	7.05102e-06	1.63812e-06	0.000189564
DO48449_B89-16-Tumor	bladder	ICGC_WXS_BLCA_CN	FALSE	PROF						FALSE	DO48449	0	B89-16-Tumor	FALSE		7.00782e-05	7.29981e-07	4.6145e-06	5.61089e-07	8.2389e-05
DO48450_B89-3-Tumor	bladder	ICGC_WXS_BLCA_CN	FALSE	PROF						FALSE	DO48450	0	B89-3-Tumor	FALSE		1.86339e-05	1.94103e-07	6.61167e-07	1.73796e-07	2.3798e-05
DO48451_B89-4-Tumor	bladder	ICGC_WXS_BLCA_CN	FALSE	PROF						FALSE	DO48451	0	B89-4-Tumor	FALSE		0.000204324	2.12838e-06	9.3005e-06	1.81654e-06	0.000204477
DO48452_B89-5-Tumor	bladder	ICGC_WXS_BLCA_CN	FALSE	PROF						FALSE	DO48452	0	B89-5-Tumor	FALSE		4.46566e-05	4.65173e-07	3.14321e-06	3.48737e-07	5.24449e-05
DO48453_B9-Tumor	bladder	ICGC_WXS_BLCA_CN	FALSE	PROF						FALSE	DO48453	0	B9-Tumor	FALSE		0.000142837	1.48788e-06	1.24727e-05	1.01028e-06	0.000169981
DO48454_B90-Tumor	bladder	ICGC_WXS_BLCA_CN	FALSE	PROF						FALSE	DO48454	0	B90-Tumor	FALSE		8.25228e-05	8.59612e-07	4.79339e-06	6.88579e-07	9.38972e-05
DO48455_B92-Tumor	bladder	ICGC_WXS_BLCA_CN	FALSE	PROF						FALSE	DO48455	0	B92-Tumor	FALSE		2.50166e-05	2.6059e-07	2.82334e-06	1.49166e-07	3.84804e-05
DO48457_B96-Tumor	bladder	ICGC_WXS_BLCA_CN	FALSE	PROF						FALSE	DO48457	0	B96-Tumor	FALSE		0.000276339	2.87853e-06	2.74545e-05	1.81e-06	0.000271749
DO48459_B98-Tumor	bladder	ICGC_WXS_BLCA_CN	FALSE	PROF						FALSE	DO48459	0	B98-Tumor	FALSE		9.9347e-05	1.03486e-06	7.24571e-06	7.64828e-07	0.000106804
DO48461_B99-Tumor	bladder	ICGC_WXS_BLCA_CN	FALSE	PROF						FALSE	DO48461	0	B99-Tumor	FALSE		2.75837e-05	2.8733e-07	4.88048e-07	2.78604e-07	4.93681e-05
DO48463_B2-Tumor	bladder	ICGC_WXS_BLCA_CN	FALSE	PROF						FALSE	DO48463	0	B2-Tumor	FALSE		2.76872e-05	2.88409e-07	2.91088e-06	1.74388e-07	2.44922e-05
DO48465_B8-Tumor	bladder	ICGC_WXS_BLCA_CN	FALSE	PROF						FALSE	DO48465	0	B8-Tumor	FALSE		3.19099e-05	3.32394e-07	3.27315e-06	2.04535e-07	3.02773e-05
DO48467_B17-Tumor	bladder	ICGC_WXS_BLCA_CN	FALSE	PROF						FALSE	DO48467	0	B17-Tumor	FALSE		7.88487e-06	8.21341e-08	9.79667e-07	4.31109e-08	1.11451e-05
DO48469_B20-Tumor	bladder	ICGC_WXS_BLCA_CN	FALSE	PROF						FALSE	DO48469	0	B20-Tumor	FALSE		1.48167e-05	1.5434e-07	9.83238e-07	1.18301e-07	1.41837e-05
DO218976_TCGA-4Z-AA7M-01A-11D-A391-08	bladder	ICGC_WXS_BLCA_US_TCGA	FALSE	PROF					0.235247	FALSE	DO218976	0	TCGA-4Z-AA7M	TRUE	TCGA-4Z-AA7M-01A-11D-A391-08	0.000424836	4.42538e-06	3.14588e-05	3.25001e-06	0.000412144
DO218978_TCGA-4Z-AA7N-01A-11D-A391-08	bladder	ICGC_WXS_BLCA_US_TCGA	FALSE	PROF					0.137352	FALSE	DO218978	0	TCGA-4Z-AA7N	TRUE	TCGA-4Z-AA7N-01A-11D-A391-08	1.46973e-05	1.53097e-07	1.23479e-06	1.06067e-07	1.35571e-05
DO218980_TCGA-4Z-AA7Q-01A-11D-A391-08	bladder	ICGC_WXS_BLCA_US_TCGA	FALSE	PROF					0.12139	FALSE	DO218980	0	TCGA-4Z-AA7Q	TRUE	TCGA-4Z-AA7Q-01A-11D-A391-08	0.000186024	1.93775e-06	1.34278e-05	1.43818e-06	0.0001892
DO218982_TCGA-4Z-AA7S-01A-11D-A391-08	bladder	ICGC_WXS_BLCA_US_TCGA	FALSE	PROF					0.177218	FALSE	DO218982	0	TCGA-4Z-AA7S	TRUE	TCGA-4Z-AA7S-01A-11D-A391-08	7.24624e-05	7.54817e-07	1.24861e-05	2.4476e-07	6.76384e-05
DO218984_TCGA-4Z-AA7W-01A-11D-A391-08	bladder	ICGC_WXS_BLCA_US_TCGA	FALSE	PROF					0.121827	FALSE	DO218984	0	TCGA-4Z-AA7W	TRUE	TCGA-4Z-AA7W-01A-11D-A391-08	0.000380912	3.96783e-06	1.63213e-05	3.43073e-06	0.00038022
DO218986_TCGA-4Z-AA80-01A-11D-A391-08	bladder	ICGC_WXS_BLCA_US_TCGA	FALSE	PROF					0.121156	FALSE	DO218986	0	TCGA-4Z-AA80	TRUE	TCGA-4Z-AA80-01A-11D-A391-08	0.000354268	3.69029e-06	3.41027e-05	2.36801e-06	0.000339347
DO218987_TCGA-4Z-AA82-01A-11D-A391-08	bladder	ICGC_WXS_BLCA_US_TCGA	FALSE	PROF					0.117734	FALSE	DO218987	0	TCGA-4Z-AA82	TRUE	TCGA-4Z-AA82-01A-11D-A391-08	9.304e-05	9.69166e-07	8.82492e-06	6.27612e-07	8.89348e-05
DO218988_TCGA-4Z-AA84-01A-11D-A391-08	bladder	ICGC_WXS_BLCA_US_TCGA	FALSE	PROF					0.135371	FALSE	DO218988	0	TCGA-4Z-AA84	TRUE	TCGA-4Z-AA84-01A-11D-A391-08	0.000420469	4.37989e-06	3.33377e-05	3.12085e-06	0.000410589
DO218989_TCGA-4Z-AA86-01A-11D-A391-08	bladder	ICGC_WXS_BLCA_US_TCGA	FALSE	PROF					0.127843	FALSE	DO218989	0	TCGA-4Z-AA86	TRUE	TCGA-4Z-AA86-01A-11D-A391-08	0.000164154	1.70994e-06	1.28583e-05	1.22523e-06	0.000161613
DO218990_TCGA-4Z-AA87-01A-11D-A391-08	bladder	ICGC_WXS_BLCA_US_TCGA	FALSE	PROF					0.132671	FALSE	DO218990	0	TCGA-4Z-AA87	TRUE	TCGA-4Z-AA87-01A-11D-A391-08	0.00021883	2.27948e-06	2.07832e-05	1.47497e-06	0.000209629
DO218991_TCGA-4Z-AA89-01A-11D-A391-08	bladder	ICGC_WXS_BLCA_US_TCGA	FALSE	PROF					0.144325	FALSE	DO218991	0	TCGA-4Z-AA89	TRUE	TCGA-4Z-AA89-01A-11D-A391-08	0.000106571	1.11012e-06	8.92835e-06	7.70192e-07	0.000106912
DO218994_TCGA-CF-A7I0-01A-22D-A34U-08	bladder	ICGC_WXS_BLCA_US_TCGA	FALSE	PROF					0.172821	FALSE	DO218994	0	TCGA-CF-A7I0	TRUE	TCGA-CF-A7I0-01A-22D-A34U-08	4.86453e-05	5.06722e-07	5.12534e-06	3.05912e-07	4.26353e-05
DO218996_TCGA-CF-A8HX-01A-11D-A364-08	bladder	ICGC_WXS_BLCA_US_TCGA	FALSE	PROF					0.114799	FALSE	DO218996	0	TCGA-CF-A8HX	TRUE	TCGA-CF-A8HX-01A-11D-A364-08	5.75332e-05	5.99304e-07	6.39896e-06	3.47145e-07	5.87355e-05
DO218998_TCGA-CF-A8HY-01A-11D-A364-08	bladder	ICGC_WXS_BLCA_US_TCGA	FALSE	PROF					0.179696	FALSE	DO218998	0	TCGA-CF-A8HY	TRUE	TCGA-CF-A8HY-01A-11D-A364-08	0.000100638	1.04831e-06	5.56962e-06	8.5173e-07	9.57183e-05
DO218999_TCGA-CF-A9FF-01A-11D-A38G-08	bladder	ICGC_WXS_BLCA_US_TCGA	FALSE	PROF					0.146838	FALSE	DO218999	0	TCGA-CF-A9FF	TRUE	TCGA-CF-A9FF-01A-11D-A38G-08	0.000125049	1.30259e-06	1.08827e-05	8.86063e-07	0.000124707
DO219000_TCGA-CF-A9FH-01A-11D-A38G-08	bladder	ICGC_WXS_BLCA_US_TCGA	FALSE	PROF					0.15798	FALSE	DO219000	0	TCGA-CF-A9FH	TRUE	TCGA-CF-A9FH-01A-11D-A38G-08	3.69708e-05	3.85112e-07	5.32658e-06	1.70266e-07	3.39931e-05
DO219001_TCGA-CF-A9FM-01A-11D-A38G-08	bladder	ICGC_WXS_BLCA_US_TCGA	FALSE	PROF					0.126564	FALSE	DO219001	0	TCGA-CF-A9FM	TRUE	TCGA-CF-A9FM-01A-11D-A38G-08	1.73796e-05	1.81037e-07	1.27856e-06	1.33319e-07	1.74012e-05
DO219002_TCGA-DK-AA6L-01A-11D-A391-08	bladder	ICGC_WXS_BLCA_US_TCGA	FALSE	PROF					0.118769	FALSE	DO219002	0	TCGA-DK-AA6L	TRUE	TCGA-DK-AA6L-01A-11D-A391-08	0.000304237	3.16913e-06	1.86451e-05	2.49627e-06	0.000291763
DO219003_TCGA-DK-AA6M-01A-11D-A391-08	bladder	ICGC_WXS_BLCA_US_TCGA	FALSE	PROF					0.132595	FALSE	DO219003	0	TCGA-DK-AA6M	TRUE	TCGA-DK-AA6M-01A-11D-A391-08	7.25434e-05	7.55661e-07	1.05375e-05	3.30364e-07	6.85119e-05
DO219004_TCGA-DK-AA6P-01A-11D-A391-08	bladder	ICGC_WXS_BLCA_US_TCGA	FALSE	PROF					0.21036	FALSE	DO219004	0	TCGA-DK-AA6P	TRUE	TCGA-DK-AA6P-01A-11D-A391-08	0.000161221	1.67938e-06	1.29439e-05	1.18962e-06	0.000155778
DO219005_TCGA-DK-AA6Q-01A-11D-A391-08	bladder	ICGC_WXS_BLCA_US_TCGA	FALSE	PROF					0.125801	FALSE	DO219005	0	TCGA-DK-AA6Q	TRUE	TCGA-DK-AA6Q-01A-11D-A391-08	8.64137e-05	9.00143e-07	6.26247e-06	6.66998e-07	8.67077e-05
DO219006_TCGA-DK-AA6R-01A-11D-A42E-08	bladder	ICGC_WXS_BLCA_US_TCGA	FALSE	PROF					0.157195	FALSE	DO219006	0	TCGA-DK-AA6R	TRUE	TCGA-DK-AA6R-01A-11D-A42E-08	0.000285343	2.97232e-06	1.60427e-05	2.40404e-06	0.000283338
DO219007_TCGA-DK-AA6S-01A-21D-A391-08	bladder	ICGC_WXS_BLCA_US_TCGA	FALSE	PROF					0.197989	FALSE	DO219007	0	TCGA-DK-AA6S	TRUE	TCGA-DK-AA6S-01A-21D-A391-08	0.000438328	4.56592e-06	2.69919e-05	3.59088e-06	0.000431977
DO219008_TCGA-DK-AA6U-01A-11D-A391-08	bladder	ICGC_WXS_BLCA_US_TCGA	FALSE	PROF					0.126151	FALSE	DO219008	0	TCGA-DK-AA6U	TRUE	TCGA-DK-AA6U-01A-11D-A391-08	0.000339968	3.54133e-06	1.90065e-05	2.86893e-06	0.00033312
DO219009_TCGA-DK-AA6W-01A-12D-A391-08	bladder	ICGC_WXS_BLCA_US_TCGA	FALSE	PROF					0.111012	FALSE	DO219009	0	TCGA-DK-AA6W	TRUE	TCGA-DK-AA6W-01A-12D-A391-08	0.000226127	2.35549e-06	2.36608e-05	1.42917e-06	0.000213844
DO219010_TCGA-DK-AA71-01A-31D-A391-08	bladder	ICGC_WXS_BLCA_US_TCGA	FALSE	PROF					0.119823	FALSE	DO219010	0	TCGA-DK-AA71	TRUE	TCGA-DK-AA71-01A-31D-A391-08	0.000523262	5.45065e-06	3.67636e-05	4.08921e-06	0.000503865
DO219011_TCGA-DK-AA74-01A-11D-A391-08	bladder	ICGC_WXS_BLCA_US_TCGA	FALSE	PROF					0.128286	FALSE	DO219011	0	TCGA-DK-AA74	TRUE	TCGA-DK-AA74-01A-11D-A391-08	0.000167188	1.74154e-06	1.00063e-05	1.38221e-06	0.000162698
DO219012_TCGA-DK-AA75-01A-11D-A391-08	bladder	ICGC_WXS_BLCA_US_TCGA	FALSE	PROF					0.1247	FALSE	DO219012	0	TCGA-DK-AA75	TRUE	TCGA-DK-AA75-01A-11D-A391-08	0.000419861	4.37355e-06	4.14005e-05	2.76369e-06	0.000420966
DO219013_TCGA-DK-AA76-01A-11D-A391-08	bladder	ICGC_WXS_BLCA_US_TCGA	FALSE	PROF					0.121087	FALSE	DO219013	0	TCGA-DK-AA76	TRUE	TCGA-DK-AA76-01A-11D-A391-08	0.000198395	2.06661e-06	1.82705e-05	1.3621e-06	0.000192767
DO219014_TCGA-DK-AA77-01A-11D-A391-08	bladder	ICGC_WXS_BLCA_US_TCGA	FALSE	PROF					0.163881	FALSE	DO219014	0	TCGA-DK-AA77	TRUE	TCGA-DK-AA77-01A-11D-A391-08	0.000288716	3.00745e-06	1.9985e-05	2.2693e-06	0.000290248
DO219015_TCGA-E7-A6MD-01A-41D-A34U-08	bladder	ICGC_WXS_BLCA_US_TCGA	FALSE	PROF					0.174212	FALSE	DO219015	0	TCGA-E7-A6MD	TRUE	TCGA-E7-A6MD-01A-41D-A34U-08	0.00038175	3.97656e-06	3.16061e-05	2.77528e-06	0.00037743
DO219016_TCGA-E7-A7DU-01A-11D-A32B-08	bladder	ICGC_WXS_BLCA_US_TCGA	FALSE	PROF					0.112154	FALSE	DO219016	0	TCGA-E7-A7DU	TRUE	TCGA-E7-A7DU-01A-11D-A32B-08	0.000215383	2.24357e-06	1.76913e-05	1.57193e-06	0.000204883
DO219017_TCGA-E7-A7PW-01A-11D-A34U-08	bladder	ICGC_WXS_BLCA_US_TCGA	FALSE	PROF					0.112737	FALSE	DO219017	0	TCGA-E7-A7PW	TRUE	TCGA-E7-A7PW-01A-11D-A34U-08	8.16896e-05	8.50934e-07	8.14278e-06	5.33897e-07	8.18243e-05
DO219018_TCGA-E7-A85H-01A-11D-A34U-08	bladder	ICGC_WXS_BLCA_US_TCGA	FALSE	PROF					0.139494	FALSE	DO219018	0	TCGA-E7-A85H	TRUE	TCGA-E7-A85H-01A-11D-A34U-08	0.000348349	3.62863e-06	2.01532e-05	2.91018e-06	0.000340596
DO219019_TCGA-E7-A8O7-01A-11D-A364-08	bladder	ICGC_WXS_BLCA_US_TCGA	FALSE	PROF					0.162361	FALSE	DO219019	0	TCGA-E7-A8O7	TRUE	TCGA-E7-A8O7-01A-11D-A364-08	2.79024e-05	2.9065e-07	2.65873e-06	1.8769e-07	2.90307e-05
DO219020_TCGA-E7-A8O8-01A-11D-A364-08	bladder	ICGC_WXS_BLCA_US_TCGA	FALSE	PROF					0.249833	FALSE	DO219020	0	TCGA-E7-A8O8	TRUE	TCGA-E7-A8O8-01A-11D-A364-08	0.00010479	1.09156e-06	1.03291e-05	6.89924e-07	0.000100669
DO219021_TCGA-E7-A97P-01A-11D-A38G-08	bladder	ICGC_WXS_BLCA_US_TCGA	FALSE	PROF					0.107594	FALSE	DO219021	0	TCGA-E7-A97P	TRUE	TCGA-E7-A97P-01A-11D-A38G-08	0.000160189	1.66863e-06	7.4202e-06	1.41856e-06	0.000156787
DO219022_TCGA-E7-A97Q-01A-11D-A38G-08	bladder	ICGC_WXS_BLCA_US_TCGA	FALSE	PROF					0.10802	FALSE	DO219022	0	TCGA-E7-A97Q	TRUE	TCGA-E7-A97Q-01A-11D-A38G-08	5.05967e-05	5.27049e-07	4.2156e-06	3.66677e-07	4.79449e-05
DO219023_TCGA-FJ-A871-01A-11D-A34U-08	bladder	ICGC_WXS_BLCA_US_TCGA	FALSE	PROF					0.11426	FALSE	DO219023	0	TCGA-FJ-A871	TRUE	TCGA-FJ-A871-01A-11D-A34U-08	4.18363e-05	4.35795e-07	4.92053e-06	2.40806e-07	4.34239e-05
DO219024_TCGA-GC-A4ZW-01A-11D-A26M-08	bladder	ICGC_WXS_BLCA_US_TCGA	FALSE					MSH6	0.185399	FALSE	DO219024	0	TCGA-GC-A4ZW	TRUE	TCGA-GC-A4ZW-01A-11D-A26M-08	0.000528683	5.50711e-06	3.57251e-05	4.19329e-06	0.000524402
DO219025_TCGA-GC-A6I3-01A-11D-A31L-08	bladder	ICGC_WXS_BLCA_US_TCGA	FALSE	PROF					0.15639	FALSE	DO219025	0	TCGA-GC-A6I3	TRUE	TCGA-GC-A6I3-01A-11D-A31L-08	0.000203661	2.12146e-06	1.30308e-05	1.64714e-06	0.000200738
DO219028_TCGA-K4-A5RH-01A-11D-A30E-08	bladder	ICGC_WXS_BLCA_US_TCGA	FALSE	PROF					0.210761	FALSE	DO219028	0	TCGA-K4-A5RH	TRUE	TCGA-K4-A5RH-01A-11D-A30E-08	0.000150238	1.56498e-06	1.33565e-05	1.05231e-06	0.000153294
DO219029_TCGA-K4-A5RI-01A-11D-A289-08	bladder	ICGC_WXS_BLCA_US_TCGA	FALSE	PROF					0.154233	FALSE	DO219029	0	TCGA-K4-A5RI	TRUE	TCGA-K4-A5RI-01A-11D-A289-08	0.000116656	1.21516e-06	9.7973e-06	8.42026e-07	0.000113062
DO219030_TCGA-K4-AAQO-01A-11D-A38G-08	bladder	ICGC_WXS_BLCA_US_TCGA	FALSE	PROF					0.144286	FALSE	DO219030	0	TCGA-K4-AAQO	TRUE	TCGA-K4-AAQO-01A-11D-A38G-08	0.000196584	2.04775e-06	1.44724e-05	1.50755e-06	0.000191874
DO219031_TCGA-UY-A78K-01A-11D-A339-08	bladder	ICGC_WXS_BLCA_US_TCGA	FALSE	PROF					0.132001	FALSE	DO219031	0	TCGA-UY-A78K	TRUE	TCGA-UY-A78K-01A-11D-A339-08	0.00056509	5.88635e-06	2.08256e-05	5.23682e-06	0.000574649
DO219032_TCGA-UY-A78L-01A-12D-A339-08	bladder	ICGC_WXS_BLCA_US_TCGA	FALSE	PROF					0.165568	FALSE	DO219032	0	TCGA-UY-A78L	TRUE	TCGA-UY-A78L-01A-12D-A339-08	0.000168063	1.75065e-06	1.2008e-05	1.30468e-06	0.000168054
DO219033_TCGA-UY-A78M-01A-21D-A34U-08	bladder	ICGC_WXS_BLCA_US_TCGA	FALSE	PROF					0.180808	FALSE	DO219033	0	TCGA-UY-A78M	TRUE	TCGA-UY-A78M-01A-21D-A34U-08	0.000130342	1.35773e-06	1.53009e-05	7.51507e-07	0.000130846
DO219034_TCGA-UY-A78N-01A-12D-A339-08	bladder	ICGC_WXS_BLCA_US_TCGA	FALSE						0.266893	FALSE	DO219034	0	TCGA-UY-A78N	TRUE	TCGA-UY-A78N-01A-12D-A339-08	0.000248579	2.58936e-06	1.28412e-05	2.14363e-06	0.000233184
DO219035_TCGA-UY-A78O-01A-12D-A339-08	bladder	ICGC_WXS_BLCA_US_TCGA	FALSE	PROF					0.132632	FALSE	DO219035	0	TCGA-UY-A78O	TRUE	TCGA-UY-A78O-01A-12D-A339-08	0.000166969	1.73926e-06	2.03738e-05	9.2906e-07	0.000165264
DO219036_TCGA-UY-A78P-01A-12D-A364-08	bladder	ICGC_WXS_BLCA_US_TCGA	FALSE	PROF					0.131522	FALSE	DO219036	0	TCGA-UY-A78P	TRUE	TCGA-UY-A78P-01A-12D-A364-08	0.000220178	2.29352e-06	1.35476e-05	1.80421e-06	0.000225513
DO219037_TCGA-UY-A8OB-01A-12D-A42E-08	bladder	ICGC_WXS_BLCA_US_TCGA	FALSE	PROF					0.125799	FALSE	DO219037	0	TCGA-UY-A8OB	TRUE	TCGA-UY-A8OB-01A-12D-A42E-08	0.000220008	2.29175e-06	6.96545e-06	2.08855e-06	0.000215126
DO219038_TCGA-UY-A8OC-01A-11D-A364-08	bladder	ICGC_WXS_BLCA_US_TCGA	FALSE	PROF					0.122661	FALSE	DO219038	0	TCGA-UY-A8OC	TRUE	TCGA-UY-A8OC-01A-11D-A364-08	8.62763e-05	8.98711e-07	9.22427e-06	5.36731e-07	8.40145e-05
DO219039_TCGA-UY-A8OD-01A-11D-A364-08	bladder	ICGC_WXS_BLCA_US_TCGA	FALSE	PROF					0.244922	FALSE	DO219039	0	TCGA-UY-A8OD	TRUE	TCGA-UY-A8OD-01A-11D-A364-08	7.64599e-05	7.96457e-07	6.43857e-06	5.51148e-07	7.98472e-05
DO219040_TCGA-UY-A9PA-01A-11D-A38G-08	bladder	ICGC_WXS_BLCA_US_TCGA	FALSE	PROF					0.134086	FALSE	DO219040	0	TCGA-UY-A9PA	TRUE	TCGA-UY-A9PA-01A-11D-A38G-08	0.000143118	1.49081e-06	7.64759e-06	1.22312e-06	0.000129847
DO219041_TCGA-UY-A9PB-01A-11D-A38G-08	bladder	ICGC_WXS_BLCA_US_TCGA	FALSE	PROF					0.15684	FALSE	DO219041	0	TCGA-UY-A9PB	TRUE	TCGA-UY-A9PB-01A-11D-A38G-08	0.000433937	4.52018e-06	2.50975e-05	3.62552e-06	0.000421709
DO219042_TCGA-UY-A9PD-01A-11D-A38G-08	bladder	ICGC_WXS_BLCA_US_TCGA	FALSE	PROF					0.237663	FALSE	DO219042	0	TCGA-UY-A9PD	TRUE	TCGA-UY-A9PD-01A-11D-A38G-08	0.000237299	2.47187e-06	1.8007e-05	1.79643e-06	0.000244676
DO219043_TCGA-UY-A9PE-01A-11D-A38G-08	bladder	ICGC_WXS_BLCA_US_TCGA	FALSE						0.263392	FALSE	DO219043	0	TCGA-UY-A9PE	TRUE	TCGA-UY-A9PE-01A-11D-A38G-08	0.000190825	1.98776e-06	1.58074e-05	1.38691e-06	0.000197341
DO219044_TCGA-UY-A9PF-01A-11D-A38G-08	bladder	ICGC_WXS_BLCA_US_TCGA	FALSE	PROF					0.119724	FALSE	DO219044	0	TCGA-UY-A9PF	TRUE	TCGA-UY-A9PF-01A-11D-A38G-08	0.000398745	4.15359e-06	3.46141e-05	2.82922e-06	0.000395592
DO219045_TCGA-XF-A9SJ-01A-11D-A391-08	bladder	ICGC_WXS_BLCA_US_TCGA	FALSE	PROF					0.186541	FALSE	DO219045	0	TCGA-XF-A9SJ	TRUE	TCGA-XF-A9SJ-01A-11D-A391-08	0.000256151	2.66824e-06	2.04715e-05	1.89418e-06	0.000245213
DO219046_TCGA-XF-A9SL-01A-11D-A391-08	bladder	ICGC_WXS_BLCA_US_TCGA	FALSE	PROF					0.160416	FALSE	DO219046	0	TCGA-XF-A9SL	TRUE	TCGA-XF-A9SL-01A-11D-A391-08	6.4662e-05	6.73562e-07	2.21803e-06	6.06411e-07	6.25723e-05
DO219047_TCGA-XF-A9SV-01A-21D-A42E-08	bladder	ICGC_WXS_BLCA_US_TCGA	FALSE	PROF					0.160514	FALSE	DO219047	0	TCGA-XF-A9SV	TRUE	TCGA-XF-A9SV-01A-21D-A42E-08	6.42014e-05	6.68765e-07	7.59492e-06	3.67628e-07	6.49436e-05
DO219049_TCGA-XF-AAMG-01A-11D-A42E-08	bladder	ICGC_WXS_BLCA_US_TCGA	FALSE	PROF					0.146195	FALSE	DO219049	0	TCGA-XF-AAMG	TRUE	TCGA-XF-AAMG-01A-11D-A42E-08	0.000746315	7.77411e-06	4.3879e-05	6.20433e-06	0.000745178
DO219050_TCGA-XF-AAMY-01A-11D-A42E-08	bladder	ICGC_WXS_BLCA_US_TCGA	FALSE	PROF					0.184486	FALSE	DO219050	0	TCGA-XF-AAMY	TRUE	TCGA-XF-AAMY-01A-11D-A42E-08	0.0001022	1.06458e-06	1.21016e-05	5.84709e-07	9.93329e-05
DO219051_TCGA-XF-AAMZ-01A-11D-A42E-08	bladder	ICGC_WXS_BLCA_US_TCGA	FALSE	PROF					0.141601	FALSE	DO219051	0	TCGA-XF-AAMZ	TRUE	TCGA-XF-AAMZ-01A-11D-A42E-08	0.000238254	2.48182e-06	2.47948e-05	1.51169e-06	0.000227808
DO219052_TCGA-XF-AAN2-01A-11D-A42E-08	bladder	ICGC_WXS_BLCA_US_TCGA	FALSE	PROF					0.212031	FALSE	DO219052	0	TCGA-XF-AAN2	TRUE	TCGA-XF-AAN2-01A-11D-A42E-08	0.000352823	3.67524e-06	2.61047e-05	2.70005e-06	0.000348127
DO219053_TCGA-XF-AAN3-01A-11D-A42E-08	bladder	ICGC_WXS_BLCA_US_TCGA	FALSE	PROF					0.123073	FALSE	DO219053	0	TCGA-XF-AAN3	TRUE	TCGA-XF-AAN3-01A-11D-A42E-08	0.000132597	1.38121e-06	1.06433e-05	9.78516e-07	0.000130708
DO219055_TCGA-ZF-A9R0-01A-11D-A38G-08	bladder	ICGC_WXS_BLCA_US_TCGA	FALSE	PROF					0.149275	FALSE	DO219055	0	TCGA-ZF-A9R0	TRUE	TCGA-ZF-A9R0-01A-11D-A38G-08	0.000154977	1.61434e-06	1.19408e-05	1.16536e-06	0.000158127
DO219057_TCGA-ZF-A9R1-01A-11D-A391-08	bladder	ICGC_WXS_BLCA_US_TCGA	FALSE	PROF					0.11552	FALSE	DO219057	0	TCGA-ZF-A9R1	TRUE	TCGA-ZF-A9R1-01A-11D-A391-08	7.86658e-05	8.19435e-07	9.12958e-06	4.58124e-07	7.63204e-05
DO219058_TCGA-ZF-A9R2-01A-11D-A391-08	bladder	ICGC_WXS_BLCA_US_TCGA	FALSE	PROF					0.112614	FALSE	DO219058	0	TCGA-ZF-A9R2	TRUE	TCGA-ZF-A9R2-01A-11D-A391-08	0.000120086	1.2509e-06	6.19255e-06	1.03604e-06	0.000113942
DO219059_TCGA-ZF-A9R3-01A-11D-A38G-08	bladder	ICGC_WXS_BLCA_US_TCGA	FALSE	PROF					0.118008	FALSE	DO219059	0	TCGA-ZF-A9R3	TRUE	TCGA-ZF-A9R3-01A-11D-A38G-08	8.24756e-05	8.59121e-07	9.83256e-06	4.68971e-07	7.59692e-05
DO219061_TCGA-ZF-A9R4-01A-11D-A38G-08	bladder	ICGC_WXS_BLCA_US_TCGA	FALSE						0.259628	FALSE	DO219061	0	TCGA-ZF-A9R4	TRUE	TCGA-ZF-A9R4-01A-11D-A38G-08	0.000195133	2.03264e-06	1.67015e-05	1.39486e-06	0.000194529
DO219063_TCGA-ZF-A9R5-01A-12D-A42E-08	bladder	ICGC_WXS_BLCA_US_TCGA	FALSE	PROF					0.156426	FALSE	DO219063	0	TCGA-ZF-A9R5	TRUE	TCGA-ZF-A9R5-01A-12D-A42E-08	8.27235e-05	8.61703e-07	8.16178e-06	5.44308e-07	8.65025e-05
DO219064_TCGA-ZF-A9R7-01A-11D-A38G-08	bladder	ICGC_WXS_BLCA_US_TCGA	FALSE	PROF					0.122339	FALSE	DO219064	0	TCGA-ZF-A9R7	TRUE	TCGA-ZF-A9R7-01A-11D-A38G-08	0.000557945	5.81192e-06	4.26945e-05	4.20833e-06	0.000560238
DO219066_TCGA-ZF-A9R9-01A-11D-A38G-08	bladder	ICGC_WXS_BLCA_US_TCGA	FALSE					PMS2	0.16638	FALSE	DO219066	0	TCGA-ZF-A9R9	TRUE	TCGA-ZF-A9R9-01A-11D-A38G-08	0.000164946	1.71818e-06	1.80324e-05	1.00887e-06	0.000162644
DO219068_TCGA-ZF-A9RC-01A-11D-A38G-08	bladder	ICGC_WXS_BLCA_US_TCGA	FALSE	PROF					0.157733	FALSE	DO219068	0	TCGA-ZF-A9RC	TRUE	TCGA-ZF-A9RC-01A-11D-A38G-08	0.000782364	8.14963e-06	5.03362e-05	6.31543e-06	0.000757376
DO219070_TCGA-ZF-A9RD-01A-11D-A42E-08	bladder	ICGC_WXS_BLCA_US_TCGA	FALSE	PROF					0.154058	FALSE	DO219070	0	TCGA-ZF-A9RD	TRUE	TCGA-ZF-A9RD-01A-11D-A42E-08	0.000145612	1.51679e-06	1.20829e-05	1.05739e-06	0.000144552
DO219072_TCGA-ZF-A9RE-01A-11D-A38G-08	bladder	ICGC_WXS_BLCA_US_TCGA	FALSE	PROF					0.125781	FALSE	DO219072	0	TCGA-ZF-A9RE	TRUE	TCGA-ZF-A9RE-01A-11D-A38G-08	6.66908e-05	6.94696e-07	8.89148e-06	3.38313e-07	6.49808e-05
DO219074_TCGA-ZF-A9RF-01A-11D-A38G-08	bladder	ICGC_WXS_BLCA_US_TCGA	FALSE	PROF					0.238773	FALSE	DO219074	0	TCGA-ZF-A9RF	TRUE	TCGA-ZF-A9RF-01A-11D-A38G-08	0.000188166	1.96006e-06	1.17638e-05	1.53381e-06	0.000182402
DO219076_TCGA-ZF-A9RG-01A-21D-A42E-08	bladder	ICGC_WXS_BLCA_US_TCGA	FALSE	PROF					0.119098	FALSE	DO219076	0	TCGA-ZF-A9RG	TRUE	TCGA-ZF-A9RG-01A-21D-A42E-08	0.000190351	1.98282e-06	1.45099e-05	1.43817e-06	0.000189484
DO219078_TCGA-ZF-A9RL-01A-11D-A38G-08	bladder	ICGC_WXS_BLCA_US_TCGA	FALSE	PROF					0.121202	FALSE	DO219078	0	TCGA-ZF-A9RL	TRUE	TCGA-ZF-A9RL-01A-11D-A38G-08	0.000300774	3.13306e-06	2.15499e-05	2.33232e-06	0.000300889
DO219079_TCGA-ZF-A9RM-01A-11D-A38G-08	bladder	ICGC_WXS_BLCA_US_TCGA	FALSE	PROF					0.173256	FALSE	DO219079	0	TCGA-ZF-A9RM	TRUE	TCGA-ZF-A9RM-01A-11D-A38G-08	7.54634e-05	7.86077e-07	5.85643e-06	5.65627e-07	7.12971e-05
DO219081_TCGA-ZF-A9RN-01A-11D-A42E-08	bladder	ICGC_WXS_BLCA_US_TCGA	FALSE	PROF					0.122359	FALSE	DO219081	0	TCGA-ZF-A9RN	TRUE	TCGA-ZF-A9RN-01A-11D-A42E-08	0.000171629	1.7878e-06	1.34297e-05	1.28163e-06	0.000167695
DO219082_TCGA-ZF-AA4N-01A-11D-A38G-08	bladder	ICGC_WXS_BLCA_US_TCGA	FALSE	PROF					0.209439	FALSE	DO219082	0	TCGA-ZF-AA4N	TRUE	TCGA-ZF-AA4N-01A-11D-A38G-08	0.00011625	1.21094e-06	7.67395e-06	9.29935e-07	0.000121021
DO219083_TCGA-ZF-AA4R-01A-11D-A38G-08	bladder	ICGC_WXS_BLCA_US_TCGA	FALSE	PROF					0.116269	FALSE	DO219083	0	TCGA-ZF-AA4R	TRUE	TCGA-ZF-AA4R-01A-11D-A38G-08	5.3119e-05	5.53323e-07	4.66541e-06	3.74536e-07	5.07983e-05
DO219084_TCGA-ZF-AA4T-01A-11D-A38G-08	bladder	ICGC_WXS_BLCA_US_TCGA	FALSE	PROF					0.145989	FALSE	DO219084	0	TCGA-ZF-AA4T	TRUE	TCGA-ZF-AA4T-01A-11D-A38G-08	8.1098e-05	8.44771e-07	7.63155e-06	5.49693e-07	7.86419e-05
DO219085_TCGA-ZF-AA4U-01A-11D-A38G-08	bladder	ICGC_WXS_BLCA_US_TCGA	FALSE	PROF					0.120161	FALSE	DO219085	0	TCGA-ZF-AA4U	TRUE	TCGA-ZF-AA4U-01A-11D-A38G-08	5.10471e-05	5.3174e-07	5.14078e-06	3.31347e-07	5.63854e-05
DO219087_TCGA-ZF-AA4V-01A-11D-A38G-08	bladder	ICGC_WXS_BLCA_US_TCGA	FALSE	PROF					0.107307	FALSE	DO219087	0	TCGA-ZF-AA4V	TRUE	TCGA-ZF-AA4V-01A-11D-A38G-08	0.000559035	5.82328e-06	3.70142e-05	4.46716e-06	0.000539632
DO219089_TCGA-ZF-AA4W-01A-12D-A38G-08	bladder	ICGC_WXS_BLCA_US_TCGA	FALSE	PROF					0.158185	FALSE	DO219089	0	TCGA-ZF-AA4W	TRUE	TCGA-ZF-AA4W-01A-12D-A38G-08	0.00041695	4.34323e-06	4.3041e-05	2.66072e-06	0.000392524
DO219091_TCGA-ZF-AA4X-01A-11D-A38G-08	bladder	ICGC_WXS_BLCA_US_TCGA	FALSE						0.280971	FALSE	DO219091	0	TCGA-ZF-AA4X	TRUE	TCGA-ZF-AA4X-01A-11D-A38G-08	0.000489152	5.09533e-06	3.4111e-05	3.83378e-06	0.000474923
DO219093_TCGA-ZF-AA51-01A-21D-A391-08	bladder	ICGC_WXS_BLCA_US_TCGA	FALSE	PROF					0.170054	FALSE	DO219093	0	TCGA-ZF-AA51	TRUE	TCGA-ZF-AA51-01A-21D-A391-08	0.000518172	5.39763e-06	2.77214e-05	4.42703e-06	0.00050871
DO219095_TCGA-ZF-AA52-01A-12D-A391-08	bladder	ICGC_WXS_BLCA_US_TCGA	FALSE	PROF					0.192745	FALSE	DO219095	0	TCGA-ZF-AA52	TRUE	TCGA-ZF-AA52-01A-12D-A391-08	0.000103734	1.08056e-06	1.33075e-05	5.4895e-07	0.000106429
DO219096_TCGA-ZF-AA53-01A-11D-A391-08	bladder	ICGC_WXS_BLCA_US_TCGA	FALSE	PROF					0.135707	FALSE	DO219096	0	TCGA-ZF-AA53	TRUE	TCGA-ZF-AA53-01A-11D-A391-08	0.000140224	1.46066e-06	1.01517e-05	1.08279e-06	0.00013589
DO219098_TCGA-ZF-AA54-01A-11D-A391-08	bladder	ICGC_WXS_BLCA_US_TCGA	FALSE	PROF					0.127894	FALSE	DO219098	0	TCGA-ZF-AA54	TRUE	TCGA-ZF-AA54-01A-11D-A391-08	0.000134953	1.40576e-06	6.50194e-06	1.18419e-06	0.000134659
DO219099_TCGA-ZF-AA56-01A-31D-A391-08	bladder	ICGC_WXS_BLCA_US_TCGA	FALSE	PROF					0.134642	FALSE	DO219099	0	TCGA-ZF-AA56	TRUE	TCGA-ZF-AA56-01A-31D-A391-08	8.50936e-05	8.86392e-07	7.83142e-06	5.84434e-07	8.05468e-05
DO219100_TCGA-ZF-AA58-01A-12D-A42E-08	bladder	ICGC_WXS_BLCA_US_TCGA	FALSE	PROF					0.229045	FALSE	DO219100	0	TCGA-ZF-AA58	TRUE	TCGA-ZF-AA58-01A-12D-A42E-08	0.000169513	1.76576e-06	8.51933e-06	1.47213e-06	0.000159575
DO219101_TCGA-ZF-AA5H-01A-11D-A391-08	bladder	ICGC_WXS_BLCA_US_TCGA	FALSE	PROF					0.151484	FALSE	DO219101	0	TCGA-ZF-AA5H	TRUE	TCGA-ZF-AA5H-01A-11D-A391-08	5.23099e-05	5.44895e-07	5.94201e-06	3.10238e-07	5.21851e-05
DO219102_TCGA-ZF-AA5N-01A-11D-A42E-08	bladder	ICGC_WXS_BLCA_US_TCGA	FALSE	PROF					0.147294	FALSE	DO219102	0	TCGA-ZF-AA5N	TRUE	TCGA-ZF-AA5N-01A-11D-A42E-08	4.51792e-05	4.70616e-07	5.76728e-06	2.40326e-07	4.38773e-05
DO219103_TCGA-ZF-AA5P-01A-11D-A391-08	bladder	ICGC_WXS_BLCA_US_TCGA	FALSE	PROF					0.133702	FALSE	DO219103	0	TCGA-ZF-AA5P	TRUE	TCGA-ZF-AA5P-01A-11D-A391-08	5.00279e-05	5.21124e-07	5.40364e-06	3.08841e-07	4.56627e-05
DO223513_TCGA-5N-A9KI-01A-31D-A42E-08	bladder	ICGC_WXS_BLCA_US_TCGA	FALSE	PROF					0.17163	FALSE	DO223513	0	TCGA-5N-A9KI	TRUE	TCGA-5N-A9KI-01A-31D-A42E-08	0.000141649	1.47551e-06	1.3774e-05	9.40789e-07	0.000142145
DO223517_TCGA-5N-A9KM-01A-11D-A42E-08	bladder	ICGC_WXS_BLCA_US_TCGA	FALSE	PROF					0.125869	FALSE	DO223517	0	TCGA-5N-A9KM	TRUE	TCGA-5N-A9KM-01A-11D-A42E-08	0.000155454	1.61931e-06	7.77854e-06	1.35152e-06	0.00016242
DO223565_TCGA-CF-A9FL-01A-11D-A38G-08	bladder	ICGC_WXS_BLCA_US_TCGA	FALSE	PROF					0.107014	FALSE	DO223565	0	TCGA-CF-A9FL	TRUE	TCGA-CF-A9FL-01A-11D-A38G-08	5.94133e-05	6.18888e-07	7.17025e-06	3.34047e-07	5.11631e-05
DO223588_TCGA-KQ-A41N-01A-11D-A339-08	bladder	ICGC_WXS_BLCA_US_TCGA	FALSE	PROF					0.118316	FALSE	DO223588	0	TCGA-KQ-A41N	TRUE	TCGA-KQ-A41N-01A-11D-A339-08	0.00286454	2.9839e-05	1.29306e-05	3.05741e-05	0.00266191
DO223589_TCGA-KQ-A41O-01A-12D-A34U-08	bladder	ICGC_WXS_BLCA_US_TCGA	FALSE	PROF					0.109645	FALSE	DO223589	0	TCGA-KQ-A41O	TRUE	TCGA-KQ-A41O-01A-12D-A34U-08	0.000198539	2.06812e-06	1.82138e-05	1.36613e-06	0.000197382
DO223590_TCGA-KQ-A41P-01A-12D-A339-08	bladder	ICGC_WXS_BLCA_US_TCGA	FALSE	PROF					0.222886	FALSE	DO223590	0	TCGA-KQ-A41P	TRUE	TCGA-KQ-A41P-01A-12D-A339-08	0.000255649	2.66302e-06	2.20022e-05	1.82218e-06	0.000245846
DO223591_TCGA-KQ-A41Q-01A-11D-A339-08	bladder	ICGC_WXS_BLCA_US_TCGA	FALSE	PROF					0.181348	FALSE	DO223591	0	TCGA-KQ-A41Q	TRUE	TCGA-KQ-A41Q-01A-11D-A339-08	0.000245441	2.55668e-06	1.53907e-05	1.99868e-06	0.000238988
DO223592_TCGA-KQ-A41R-01A-21D-A34U-08	bladder	ICGC_WXS_BLCA_US_TCGA	FALSE	PROF					0.125342	FALSE	DO223592	0	TCGA-KQ-A41R	TRUE	TCGA-KQ-A41R-01A-21D-A34U-08	0.000654994	6.82285e-06	5.64641e-05	4.66454e-06	0.000640801
DO223593_TCGA-KQ-A41S-01A-12D-A339-08	bladder	ICGC_WXS_BLCA_US_TCGA	FALSE	PROF					0.218032	FALSE	DO223593	0	TCGA-KQ-A41S	TRUE	TCGA-KQ-A41S-01A-12D-A339-08	0.000204169	2.12676e-06	1.24804e-05	1.6766e-06	0.000203726
DO223594_TCGA-UY-A9PH-01A-11D-A38G-08	bladder	ICGC_WXS_BLCA_US_TCGA	FALSE	PROF					0.149234	FALSE	DO223594	0	TCGA-UY-A9PH	TRUE	TCGA-UY-A9PH-01A-11D-A38G-08	0.000320589	3.33947e-06	2.45597e-05	2.41685e-06	0.000317755
DO223596_TCGA-XF-A9SK-01A-11D-A42E-08	bladder	ICGC_WXS_BLCA_US_TCGA	FALSE	PROF					0.11545	FALSE	DO223596	0	TCGA-XF-A9SK	TRUE	TCGA-XF-A9SK-01A-11D-A42E-08	0.000128223	1.33565e-06	1.1474e-05	8.94854e-07	0.000122926
DO223597_TCGA-XF-A9SM-01A-11D-A42E-08	bladder	ICGC_WXS_BLCA_US_TCGA	FALSE	PROF					0.134954	FALSE	DO223597	0	TCGA-XF-A9SM	TRUE	TCGA-XF-A9SM-01A-11D-A42E-08	0.000187417	1.95226e-06	1.20553e-05	1.513e-06	0.00017825
DO223598_TCGA-XF-A9SP-01A-11D-A391-08	bladder	ICGC_WXS_BLCA_US_TCGA	FALSE	PROF					0.139791	FALSE	DO223598	0	TCGA-XF-A9SP	TRUE	TCGA-XF-A9SP-01A-11D-A391-08	0.000250313	2.60742e-06	2.14489e-05	1.78823e-06	0.000254524
DO223599_TCGA-XF-A9ST-01A-11D-A42E-08	bladder	ICGC_WXS_BLCA_US_TCGA	FALSE	PROF					0.113083	FALSE	DO223599	0	TCGA-XF-A9ST	TRUE	TCGA-XF-A9ST-01A-11D-A42E-08	0.000432645	4.50672e-06	2.12033e-05	3.78077e-06	0.000425394
DO223600_TCGA-XF-A9SU-01A-31D-A391-08	bladder	ICGC_WXS_BLCA_US_TCGA	FALSE	PROF					0.131747	FALSE	DO223600	0	TCGA-XF-A9SU	TRUE	TCGA-XF-A9SU-01A-31D-A391-08	5.76452e-05	6.00471e-07	8.88101e-06	2.40448e-07	5.21907e-05
DO44027_TCGA-BL-A5ZZ-01A-31D-A30E-08	bladder	ICGC_WXS_BLCA_US_TCGA	FALSE	PROF					0.11345	FALSE	DO44027	0	TCGA-BL-A5ZZ	TRUE	TCGA-BL-A5ZZ-01A-31D-A30E-08	0.000134086	1.39673e-06	1.17129e-05	9.48206e-07	0.000138974
DO44028_TCGA-E7-A519-01A-11D-A26M-08	bladder	ICGC_WXS_BLCA_US_TCGA	FALSE	PROF					0.150761	FALSE	DO44028	0	TCGA-E7-A519	TRUE	TCGA-E7-A519-01A-11D-A26M-08	5.16613e-05	5.38139e-07	3.39697e-06	4.13842e-07	5.22144e-05
DO44029_TCGA-LT-A5Z6-01A-11D-A289-08	bladder	ICGC_WXS_BLCA_US_TCGA	FALSE						0.25636	FALSE	DO44029	0	TCGA-LT-A5Z6	TRUE	TCGA-LT-A5Z6-01A-11D-A289-08	0.000393629	4.1003e-06	2.11326e-05	3.35976e-06	0.000391576
DO44030_TCGA-BT-A42E-01A-11D-A23U-08	bladder	ICGC_WXS_BLCA_US_TCGA	FALSE	PROF					0.146429	FALSE	DO44030	0	TCGA-BT-A42E	TRUE	TCGA-BT-A42E-01A-11D-A23U-08	0.000145673	1.51742e-06	1.2604e-05	1.0354e-06	0.000138194
DO44031_TCGA-LC-A66R-01A-41D-A30E-08	bladder	ICGC_WXS_BLCA_US_TCGA	FALSE	PROF					0.120737	FALSE	DO44031	0	TCGA-LC-A66R	TRUE	TCGA-LC-A66R-01A-41D-A30E-08	0.000121943	1.27024e-06	9.98705e-06	8.91246e-07	0.000123122
DO44032_TCGA-FD-A5BT-01A-11D-A26M-08	bladder	ICGC_WXS_BLCA_US_TCGA	FALSE	PROF					0.144387	FALSE	DO44032	0	TCGA-FD-A5BT	TRUE	TCGA-FD-A5BT-01A-11D-A26M-08	0.000111867	1.16528e-06	1.20022e-05	6.94106e-07	0.0001073
DO44033_TCGA-E7-A677-01A-11D-A30E-08	bladder	ICGC_WXS_BLCA_US_TCGA	FALSE	PROF					0.124257	FALSE	DO44033	0	TCGA-E7-A677	TRUE	TCGA-E7-A677-01A-11D-A30E-08	0.000190057	1.97976e-06	1.23655e-05	1.52821e-06	0.000186633
DO44034_TCGA-FD-A5BY-01A-31D-A289-08	bladder	ICGC_WXS_BLCA_US_TCGA	FALSE	PROF					0.132141	FALSE	DO44034	0	TCGA-FD-A5BY	TRUE	TCGA-FD-A5BY-01A-31D-A289-08	3.88855e-05	4.05057e-07	4.09476e-06	2.44635e-07	3.85141e-05
DO44035_TCGA-FT-A61P-01A-11D-A30E-08	bladder	ICGC_WXS_BLCA_US_TCGA	FALSE	PROF					0.220133	FALSE	DO44035	0	TCGA-FT-A61P	TRUE	TCGA-FT-A61P-01A-11D-A30E-08	0.000138618	1.44394e-06	1.13476e-05	1.01334e-06	0.000133488
DO44036_TCGA-FD-A5BV-01A-11D-A26M-08	bladder	ICGC_WXS_BLCA_US_TCGA	FALSE	PROF					0.149691	FALSE	DO44036	0	TCGA-FD-A5BV	TRUE	TCGA-FD-A5BV-01A-11D-A26M-08	9.30686e-05	9.69465e-07	6.80739e-06	7.15642e-07	9.01478e-05
DO44037_TCGA-E7-A541-01A-11D-A26M-08	bladder	ICGC_WXS_BLCA_US_TCGA	FALSE	PROF					0.14563	FALSE	DO44037	0	TCGA-E7-A541	TRUE	TCGA-E7-A541-01A-11D-A26M-08	0.000325172	3.38721e-06	2.17952e-05	2.58686e-06	0.000325908
DO44038_TCGA-E7-A5KF-01A-11D-A289-08	bladder	ICGC_WXS_BLCA_US_TCGA	FALSE	PROF					0.138693	FALSE	DO44038	0	TCGA-E7-A5KF	TRUE	TCGA-E7-A5KF-01A-11D-A289-08	0.000153165	1.59547e-06	1.03707e-05	1.21394e-06	0.000151535
DO44039_TCGA-K4-A4AB-01B-12D-A289-08	bladder	ICGC_WXS_BLCA_US_TCGA	FALSE	PROF					0.118599	FALSE	DO44039	0	TCGA-K4-A4AB	TRUE	TCGA-K4-A4AB-01B-12D-A289-08	9.45082e-05	9.84461e-07	8.81406e-06	6.44043e-07	8.80373e-05
DO44040_TCGA-FD-A5BU-01A-31D-A26M-08	bladder	ICGC_WXS_BLCA_US_TCGA	FALSE	PROF					0.129157	FALSE	DO44040	0	TCGA-FD-A5BU	TRUE	TCGA-FD-A5BU-01A-31D-A26M-08	6.13542e-05	6.39107e-07	6.66792e-06	3.76984e-07	6.07744e-05
DO44041_TCGA-FD-A5BR-01A-11D-A26M-08	bladder	ICGC_WXS_BLCA_US_TCGA	FALSE	PROF					0.131165	FALSE	DO44041	0	TCGA-FD-A5BR	TRUE	TCGA-FD-A5BR-01A-11D-A26M-08	7.97638e-05	8.30873e-07	8.83367e-06	4.82926e-07	7.22777e-05
DO44042_TCGA-CF-A47X-01A-31D-A23U-08	bladder	ICGC_WXS_BLCA_US_TCGA	FALSE	PROF					0.120396	FALSE	DO44042	0	TCGA-CF-A47X	TRUE	TCGA-CF-A47X-01A-31D-A23U-08	0.000269247	2.80466e-06	2.25645e-05	1.94554e-06	0.000266923
DO44043_TCGA-FD-A5C1-01A-11D-A289-08	bladder	ICGC_WXS_BLCA_US_TCGA	FALSE	PROF					0.149616	FALSE	DO44043	0	TCGA-FD-A5C1	TRUE	TCGA-FD-A5C1-01A-11D-A289-08	0.000129175	1.34557e-06	1.43353e-05	7.808e-07	0.000127904
DO44044_TCGA-FD-A62S-01A-11D-A30E-08	bladder	ICGC_WXS_BLCA_US_TCGA	FALSE	PROF					0.12231	FALSE	DO44044	0	TCGA-FD-A62S	TRUE	TCGA-FD-A62S-01A-11D-A30E-08	6.69319e-05	6.97207e-07	5.64805e-06	4.81953e-07	6.32465e-05
DO44045_TCGA-K4-A6FZ-01A-11D-A31L-08	bladder	ICGC_WXS_BLCA_US_TCGA	FALSE	PROF					0.155437	FALSE	DO44045	0	TCGA-K4-A6FZ	TRUE	TCGA-K4-A6FZ-01A-11D-A31L-08	0.000286468	2.98404e-06	1.22776e-05	2.57998e-06	0.000279632
DO44046_TCGA-FD-A5C0-01A-11D-A289-08	bladder	ICGC_WXS_BLCA_US_TCGA	FALSE	PROF					0.200221	FALSE	DO44046	0	TCGA-FD-A5C0	TRUE	TCGA-FD-A5C0-01A-11D-A289-08	0.00010366	1.07979e-06	1.05636e-05	6.67447e-07	0.000103274
DO44047_TCGA-FD-A5BS-01A-21D-A26M-08	bladder	ICGC_WXS_BLCA_US_TCGA	FALSE	PROF					0.144273	FALSE	DO44047	0	TCGA-FD-A5BS	TRUE	TCGA-FD-A5BS-01A-21D-A26M-08	2.00497e-05	2.08851e-07	1.47486e-06	1.53807e-07	2.03203e-05
DO44048_TCGA-E7-A5KE-01A-11D-A289-08	bladder	ICGC_WXS_BLCA_US_TCGA	FALSE	PROF					0.169087	FALSE	DO44048	0	TCGA-E7-A5KE	TRUE	TCGA-E7-A5KE-01A-11D-A289-08	0.000189034	1.9691e-06	1.89219e-05	1.23202e-06	0.000184866
DO44049_TCGA-FD-A43P-01A-31D-A23U-08	bladder	ICGC_WXS_BLCA_US_TCGA	FALSE	PROF					0.143534	FALSE	DO44049	0	TCGA-FD-A43P	TRUE	TCGA-FD-A43P-01A-31D-A23U-08	0.000328147	3.41819e-06	2.48269e-05	2.48738e-06	0.0003237
DO44050_TCGA-CF-A47Y-01A-11D-A23U-08	bladder	ICGC_WXS_BLCA_US_TCGA	FALSE	PROF					0.168059	FALSE	DO44050	0	TCGA-CF-A47Y	TRUE	TCGA-CF-A47Y-01A-11D-A23U-08	5.18428e-05	5.40029e-07	3.56848e-06	4.08357e-07	5.15687e-05
DO44051_TCGA-BT-A3PK-01A-21D-A21Z-08	bladder	ICGC_WXS_BLCA_US_TCGA	FALSE	PROF					0.153448	FALSE	DO44051	0	TCGA-BT-A3PK	TRUE	TCGA-BT-A3PK-01A-21D-A21Z-08	0.000282293	2.94056e-06	1.10239e-05	2.5891e-06	0.000275846
DO44052_TCGA-FD-A5BZ-01A-11D-A289-08	bladder	ICGC_WXS_BLCA_US_TCGA	FALSE	PROF					0.125234	FALSE	DO44052	0	TCGA-FD-A5BZ	TRUE	TCGA-FD-A5BZ-01A-11D-A289-08	0.000119742	1.24731e-06	1.23429e-05	7.64891e-07	0.000115855
DO44053_TCGA-CF-A47V-01A-11D-A23U-08	bladder	ICGC_WXS_BLCA_US_TCGA	FALSE	PROF					0.170685	FALSE	DO44053	0	TCGA-CF-A47V	TRUE	TCGA-CF-A47V-01A-11D-A23U-08	6.42907e-05	6.69695e-07	6.14681e-06	4.31559e-07	6.50037e-05
DO44054_TCGA-FD-A62P-01A-32D-A30E-08	bladder	ICGC_WXS_BLCA_US_TCGA	FALSE	PROF					0.121763	FALSE	DO44054	0	TCGA-FD-A62P	TRUE	TCGA-FD-A62P-01A-32D-A30E-08	0.000336213	3.50222e-06	2.76982e-05	2.45022e-06	0.000325242
DO44055_TCGA-E5-A4TZ-01A-11D-A31L-08	bladder	ICGC_WXS_BLCA_US_TCGA	FALSE	PROF					0.108372	FALSE	DO44055	0	TCGA-E5-A4TZ	TRUE	TCGA-E5-A4TZ-01A-11D-A31L-08	0.000389439	4.05666e-06	3.57033e-05	2.68072e-06	0.000384138
DO44056_TCGA-CF-A47W-01A-11D-A23U-08	bladder	ICGC_WXS_BLCA_US_TCGA	FALSE	PROF					0.18013	FALSE	DO44056	0	TCGA-CF-A47W	TRUE	TCGA-CF-A47W-01A-11D-A23U-08	2.8854e-05	3.00562e-07	3.39893e-06	1.65851e-07	2.76605e-05
DO44057_TCGA-CF-A47T-01A-11D-A23U-08	bladder	ICGC_WXS_BLCA_US_TCGA	FALSE	PROF					0.12804	FALSE	DO44057	0	TCGA-CF-A47T	TRUE	TCGA-CF-A47T-01A-11D-A23U-08	2.35689e-05	2.4551e-07	3.22224e-06	1.16087e-07	2.55836e-05
DO44059_TCGA-CU-A5W6-01A-11D-A289-08	bladder	ICGC_WXS_BLCA_US_TCGA	FALSE	PROF					0.135995	FALSE	DO44059	0	TCGA-CU-A5W6	TRUE	TCGA-CU-A5W6-01A-11D-A289-08	0.000170851	1.7797e-06	1.26846e-05	1.30558e-06	0.000179533
DO44061_TCGA-E5-A4U1-01A-11D-A31L-08	bladder	ICGC_WXS_BLCA_US_TCGA	FALSE	PROF					0.106869	FALSE	DO44061	0	TCGA-E5-A4U1	TRUE	TCGA-E5-A4U1-01A-11D-A31L-08	0.000476332	4.96179e-06	3.13689e-05	3.81366e-06	0.000474052
DO44065_TCGA-FJ-A3Z9-01A-11D-A26M-08	bladder	ICGC_WXS_BLCA_US_TCGA	FALSE	PROF					0.131134	FALSE	DO44065	0	TCGA-FJ-A3Z9	TRUE	TCGA-FJ-A3Z9-01A-11D-A26M-08	7.56864e-05	7.88401e-07	1.25998e-05	2.74861e-07	7.4984e-05
DO44067_TCGA-FD-A43X-01A-11D-A23U-08	bladder	ICGC_WXS_BLCA_US_TCGA	FALSE	PROF					0.135703	FALSE	DO44067	0	TCGA-FD-A43X	TRUE	TCGA-FD-A43X-01A-11D-A23U-08	0.000249339	2.59728e-06	1.87304e-05	1.89584e-06	0.000251944
DO44069_TCGA-FD-A62O-01A-11D-A30E-08	bladder	ICGC_WXS_BLCA_US_TCGA	FALSE	PROF					0.106014	FALSE	DO44069	0	TCGA-FD-A62O	TRUE	TCGA-FD-A62O-01A-11D-A30E-08	0.000172189	1.79364e-06	2.02859e-05	9.89626e-07	0.000165838
DO44071_TCGA-FD-A43Y-01A-21D-A26M-08	bladder	ICGC_WXS_BLCA_US_TCGA	FALSE	PROF					0.130263	FALSE	DO44071	0	TCGA-FD-A43Y	TRUE	TCGA-FD-A43Y-01A-21D-A26M-08	4.91862e-05	5.12356e-07	2.42581e-06	4.29162e-07	4.87568e-05
DO44073_TCGA-E7-A4XJ-01A-11D-A26M-08	bladder	ICGC_WXS_BLCA_US_TCGA	FALSE	PROF					0.150701	FALSE	DO44073	0	TCGA-E7-A4XJ	TRUE	TCGA-E7-A4XJ-01A-11D-A26M-08	5.12606e-05	5.33964e-07	7.82785e-06	2.16839e-07	5.08015e-05
DO44075_TCGA-CF-A47S-01A-11D-A23U-08	bladder	ICGC_WXS_BLCA_US_TCGA	FALSE	PROF					0.160685	FALSE	DO44075	0	TCGA-CF-A47S	TRUE	TCGA-CF-A47S-01A-11D-A23U-08	2.33827e-05	2.4357e-07	3.69783e-06	9.33849e-08	2.29767e-05
DO44077_TCGA-K4-A6MB-01A-11D-A31L-08	bladder	ICGC_WXS_BLCA_US_TCGA	FALSE	PROF					0.159671	FALSE	DO44077	0	TCGA-K4-A6MB	TRUE	TCGA-K4-A6MB-01A-11D-A31L-08	0.00027673	2.88261e-06	2.23668e-05	2.03547e-06	0.000273611
DO44079_TCGA-FD-A5BX-01A-11D-A26M-08	bladder	ICGC_WXS_BLCA_US_TCGA	FALSE	PROF					0.12641	FALSE	DO44079	0	TCGA-FD-A5BX	TRUE	TCGA-FD-A5BX-01A-11D-A26M-08	0.000266772	2.77887e-06	1.92141e-05	2.0643e-06	0.000264595
DO44081_TCGA-FD-A62N-01A-11D-A30E-08	bladder	ICGC_WXS_BLCA_US_TCGA	FALSE	PROF					0.130821	FALSE	DO44081	0	TCGA-FD-A62N	TRUE	TCGA-FD-A62N-01A-11D-A30E-08	7.50863e-05	7.82149e-07	5.16221e-06	5.91712e-07	7.33892e-05
DO44083_TCGA-E7-A678-01A-11D-A30E-08	bladder	ICGC_WXS_BLCA_US_TCGA	FALSE	PROF					0.119338	FALSE	DO44083	0	TCGA-E7-A678	TRUE	TCGA-E7-A678-01A-11D-A30E-08	4.97714e-05	5.18452e-07	6.31118e-06	2.66594e-07	4.48478e-05
DO44097_TCGA-BT-A3PJ-01A-21D-A21Z-08	bladder	ICGC_WXS_BLCA_US_TCGA	FALSE	PROF					0.11993	FALSE	DO44097	0	TCGA-BT-A3PJ	TRUE	TCGA-BT-A3PJ-01A-21D-A21Z-08	0.000429827	4.47736e-06	3.36731e-05	3.20798e-06	0.000413239
DO44098_TCGA-BT-A2LB-01A-11D-A18F-08	bladder	ICGC_WXS_BLCA_US_TCGA	FALSE	PROF					0.119868	FALSE	DO44098	0	TCGA-BT-A2LB	TRUE	TCGA-BT-A2LB-01A-11D-A18F-08	0.000518804	5.40421e-06	4.09642e-05	3.85812e-06	0.000501329
DO444_TCGA-DK-A2I1-01A-11D-A17V-08	bladder	ICGC_WXS_BLCA_US_TCGA	FALSE	PROF					0.137635	FALSE	DO444	0	TCGA-DK-A2I1	TRUE	TCGA-DK-A2I1-01A-11D-A17V-08	0.000553223	5.76274e-06	1.53511e-05	5.34586e-06	0.000560729
DO445_TCGA-DK-A3IQ-01A-31D-A20D-08	bladder	ICGC_WXS_BLCA_US_TCGA	FALSE	PROF					0.123756	FALSE	DO445	0	TCGA-DK-A3IQ	TRUE	TCGA-DK-A3IQ-01A-31D-A20D-08	0.000151558	1.57873e-06	1.11327e-05	1.16334e-06	0.000144079
DO446_TCGA-GC-A3BM-01A-11D-A22Z-08	bladder	ICGC_WXS_BLCA_US_TCGA	FALSE	PROF					0.139141	FALSE	DO446	0	TCGA-GC-A3BM	TRUE	TCGA-GC-A3BM-01A-11D-A22Z-08	0.000133265	1.38818e-06	1.82589e-05	6.54665e-07	0.000128558
DO447_TCGA-DK-A3X1-01A-12D-A22Z-08	bladder	ICGC_WXS_BLCA_US_TCGA	FALSE	PROF					0.138615	FALSE	DO447	0	TCGA-DK-A3X1	TRUE	TCGA-DK-A3X1-01A-12D-A22Z-08	0.000732399	7.62915e-06	5.71708e-05	5.47517e-06	0.000718708
DO448_TCGA-GV-A3JX-01A-11D-A20D-08	bladder	ICGC_WXS_BLCA_US_TCGA	FALSE	PROF					0.171022	FALSE	DO448	0	TCGA-GV-A3JX	TRUE	TCGA-GV-A3JX-01A-11D-A20D-08	0.000219062	2.2819e-06	1.70105e-05	1.64152e-06	0.000211309
DO449_TCGA-CU-A0YR-01A-12D-A10S-08	bladder	ICGC_WXS_BLCA_US_TCGA	FALSE	PROF					0.141269	FALSE	DO449	0	TCGA-CU-A0YR	TRUE	TCGA-CU-A0YR-01A-12D-A10S-08	0.000112604	1.17296e-06	7.30615e-06	9.06297e-07	0.000112186
DO450_TCGA-BT-A20X-01A-11D-A16O-08	bladder	ICGC_WXS_BLCA_US_TCGA	FALSE	PROF					0.136467	FALSE	DO450	0	TCGA-BT-A20X	TRUE	TCGA-BT-A20X-01A-11D-A16O-08	6.27466e-05	6.53611e-07	3.53185e-06	5.2847e-07	5.72055e-05
DO451_TCGA-K4-A3WU-01B-11D-A23M-08	bladder	ICGC_WXS_BLCA_US_TCGA	FALSE	PROF					0.132236	FALSE	DO451	0	TCGA-K4-A3WU	TRUE	TCGA-K4-A3WU-01B-11D-A23M-08	0.000171113	1.78242e-06	1.83976e-05	1.06002e-06	0.000170028
DO452_TCGA-BL-A13I-01A-11D-A271-08	bladder	ICGC_WXS_BLCA_US_TCGA	FALSE	PROF					0.132098	FALSE	DO452	0	TCGA-BL-A13I	TRUE	TCGA-BL-A13I-01A-11D-A271-08	6.83132e-05	7.11596e-07	5.08157e-06	5.21597e-07	7.59471e-05
DO453_TCGA-E7-A4IJ-01A-31D-A26M-08	bladder	ICGC_WXS_BLCA_US_TCGA	FALSE	PROF					0.219154	FALSE	DO453	0	TCGA-E7-A4IJ	TRUE	TCGA-E7-A4IJ-01A-31D-A26M-08	0.000286581	2.98522e-06	1.95744e-05	2.26395e-06	0.000277956
DO454_TCGA-DK-A3IK-01A-32D-A21A-08	bladder	ICGC_WXS_BLCA_US_TCGA	FALSE	PROF					0.188066	FALSE	DO454	0	TCGA-DK-A3IK	TRUE	TCGA-DK-A3IK-01A-32D-A21A-08	0.000180959	1.88499e-06	1.704e-05	1.22608e-06	0.000168646
DO455_TCGA-DK-A3IN-01A-11D-A20D-08	bladder	ICGC_WXS_BLCA_US_TCGA	FALSE	PROF					0.129419	FALSE	DO455	0	TCGA-DK-A3IN	TRUE	TCGA-DK-A3IN-01A-11D-A20D-08	0.00030561	3.18344e-06	2.3362e-05	2.30611e-06	0.00030628
DO456_TCGA-G2-A2EO-01A-11D-A17V-08	bladder	ICGC_WXS_BLCA_US_TCGA	FALSE	PROF					0.146596	FALSE	DO456	0	TCGA-G2-A2EO	TRUE	TCGA-G2-A2EO-01A-11D-A17V-08	0.000727167	7.57465e-06	4.25373e-05	6.05454e-06	0.000705233
DO457_TCGA-BT-A20J-01A-11D-A14W-08	bladder	ICGC_WXS_BLCA_US_TCGA	FALSE	PROF					0.149548	FALSE	DO457	0	TCGA-BT-A20J	TRUE	TCGA-BT-A20J-01A-11D-A14W-08	0.000384917	4.00955e-06	3.7236e-05	2.56492e-06	0.000376531
DO458_TCGA-FD-A3B6-01A-21D-A20D-08	bladder	ICGC_WXS_BLCA_US_TCGA	FALSE					MLH1	0.13089	FALSE	DO458	0	TCGA-FD-A3B6	TRUE	TCGA-FD-A3B6-01A-21D-A20D-08	0.000209981	2.18731e-06	1.56967e-05	1.59994e-06	0.000202049
DO459_TCGA-DK-A1AD-01A-11D-A13W-08	bladder	ICGC_WXS_BLCA_US_TCGA	FALSE	PROF					0.207841	FALSE	DO459	0	TCGA-DK-A1AD	TRUE	TCGA-DK-A1AD-01A-11D-A13W-08	0.000194066	2.02152e-06	1.27999e-05	1.55289e-06	0.000191316
DO460_TCGA-BT-A20O-01A-21D-A14W-08	bladder	ICGC_WXS_BLCA_US_TCGA	FALSE	PROF					0.178526	FALSE	DO460	0	TCGA-BT-A20O	TRUE	TCGA-BT-A20O-01A-21D-A14W-08	0.000139456	1.45267e-06	9.52848e-06	1.10155e-06	0.000141324
DO461_TCGA-DK-A1AB-01A-11D-A13W-08	bladder	ICGC_WXS_BLCA_US_TCGA	FALSE	PROF					0.137891	FALSE	DO461	0	TCGA-DK-A1AB	TRUE	TCGA-DK-A1AB-01A-11D-A13W-08	0.000142864	1.48816e-06	8.67126e-06	1.17586e-06	0.000145508
DO462_TCGA-FD-A3SQ-01A-21D-A22Z-08	bladder	ICGC_WXS_BLCA_US_TCGA	FALSE	PROF					0.13057	FALSE	DO462	0	TCGA-FD-A3SQ	TRUE	TCGA-FD-A3SQ-01A-21D-A22Z-08	6.34487e-05	6.60924e-07	6.37617e-06	4.12436e-07	7.15458e-05
DO463_TCGA-FJ-A3Z7-01A-12D-A23M-08	bladder	ICGC_WXS_BLCA_US_TCGA	FALSE	PROF					0.136389	FALSE	DO463	0	TCGA-FJ-A3Z7	TRUE	TCGA-FJ-A3Z7-01A-12D-A23M-08	0.000250999	2.61457e-06	1.71191e-05	1.98394e-06	0.000257658
DO464_TCGA-GV-A3QH-01A-11D-A21Z-08	bladder	ICGC_WXS_BLCA_US_TCGA	FALSE	PROF					0.218528	FALSE	DO464	0	TCGA-GV-A3QH	TRUE	TCGA-GV-A3QH-01A-11D-A21Z-08	0.00013224	1.3775e-06	1.28167e-05	8.80142e-07	0.000134712
DO465_TCGA-DK-A2I4-01A-11D-A21A-08	bladder	ICGC_WXS_BLCA_US_TCGA	FALSE	PROF					0.138609	FALSE	DO465	0	TCGA-DK-A2I4	TRUE	TCGA-DK-A2I4-01A-11D-A21A-08	0.000777488	8.09883e-06	6.44407e-05	5.64919e-06	0.00074761
DO466_TCGA-CU-A0YO-01A-11D-A10S-08	bladder	ICGC_WXS_BLCA_US_TCGA	FALSE	PROF					0.142827	FALSE	DO466	0	TCGA-CU-A0YO	TRUE	TCGA-CU-A0YO-01A-11D-A10S-08	9.89577e-05	1.03081e-06	1.03925e-05	6.23779e-07	8.99283e-05
DO467_TCGA-DK-A3IV-01A-22D-A21A-08	bladder	ICGC_WXS_BLCA_US_TCGA	FALSE	PROF					0.12734	FALSE	DO467	0	TCGA-DK-A3IV	TRUE	TCGA-DK-A3IV-01A-22D-A21A-08	6.83451e-05	7.11928e-07	4.78267e-06	5.34939e-07	6.60184e-05
DO468_TCGA-CF-A3MG-01A-11D-A20D-08	bladder	ICGC_WXS_BLCA_US_TCGA	FALSE	PROF					0.132959	FALSE	DO468	0	TCGA-CF-A3MG	TRUE	TCGA-CF-A3MG-01A-11D-A20D-08	0.000118611	1.23554e-06	1.02804e-05	8.4228e-07	0.000110646
DO469_TCGA-CF-A1HR-01A-11D-A13W-08	bladder	ICGC_WXS_BLCA_US_TCGA	FALSE	PROF					0.159199	FALSE	DO469	0	TCGA-CF-A1HR	TRUE	TCGA-CF-A1HR-01A-11D-A13W-08	0.000231935	2.41599e-06	1.90786e-05	1.69153e-06	0.000224596
DO470_TCGA-GV-A3QI-01A-11D-A21Z-08	bladder	ICGC_WXS_BLCA_US_TCGA	FALSE						0.340337	FALSE	DO470	0	TCGA-GV-A3QI	TRUE	TCGA-GV-A3QI-01A-11D-A21Z-08	0.000331859	3.45686e-06	1.42337e-05	2.9883e-06	0.000344629
DO471_TCGA-GV-A3QF-01A-31D-A22Z-08	bladder	ICGC_WXS_BLCA_US_TCGA	FALSE	PROF					0.168618	FALSE	DO471	0	TCGA-GV-A3QF	TRUE	TCGA-GV-A3QF-01A-31D-A22Z-08	0.000102527	1.06798e-06	6.75903e-06	8.20548e-07	0.000104023
DO472_TCGA-DK-A1A6-06A-11D-A42E-08	bladder	ICGC_WXS_BLCA_US_TCGA	FALSE	PROF					0.106137	FALSE	DO472	0	TCGA-DK-A1A6	TRUE	TCGA-DK-A1A6-06A-11D-A42E-08	0.000218508	2.27613e-06	1.71716e-05	1.6285e-06	0.000212938
DO473_TCGA-DK-A2HX-01A-12D-A18F-08	bladder	ICGC_WXS_BLCA_US_TCGA	FALSE						0.27186	FALSE	DO473	0	TCGA-DK-A2HX	TRUE	TCGA-DK-A2HX-01A-12D-A18F-08	9.66425e-05	1.00669e-06	9.46017e-06	6.3915e-07	8.92929e-05
DO474_TCGA-MV-A51V-01A-11D-A26M-08	bladder	ICGC_WXS_BLCA_US_TCGA	FALSE	PROF					0.178583	FALSE	DO474	0	TCGA-MV-A51V	TRUE	TCGA-MV-A51V-01A-11D-A26M-08	0.00113624	1.18358e-05	6.17891e-05	9.66391e-06	0.0011022
DO475_TCGA-E7-A3X6-01A-12D-A22Z-08	bladder	ICGC_WXS_BLCA_US_TCGA	FALSE	PROF					0.122563	FALSE	DO475	0	TCGA-E7-A3X6	TRUE	TCGA-E7-A3X6-01A-12D-A22Z-08	8.77175e-05	9.13724e-07	7.45546e-06	6.29301e-07	8.72153e-05
DO476_TCGA-C4-A0EZ-01A-21D-A10S-08	bladder	ICGC_WXS_BLCA_US_TCGA	FALSE	PROF					0.119665	FALSE	DO476	0	TCGA-C4-A0EZ	TRUE	TCGA-C4-A0EZ-01A-21D-A10S-08	0.000175545	1.82859e-06	1.9086e-05	1.07827e-06	0.000176141
DO477_TCGA-DK-A1A5-01A-11D-A13W-08	bladder	ICGC_WXS_BLCA_US_TCGA	FALSE	PROF					0.196749	FALSE	DO477	0	TCGA-DK-A1A5	TRUE	TCGA-DK-A1A5-01A-11D-A13W-08	0.000209085	2.17796e-06	1.75566e-05	1.50933e-06	0.000210505
DO478_TCGA-G2-A2EL-01A-12D-A18F-08	bladder	ICGC_WXS_BLCA_US_TCGA	FALSE	PROF					0.115051	FALSE	DO478	0	TCGA-G2-A2EL	TRUE	TCGA-G2-A2EL-01A-12D-A18F-08	0.000191608	1.99591e-06	1.71601e-05	1.3366e-06	0.000193189
DO479_TCGA-CF-A3MF-01A-12D-A21A-08	bladder	ICGC_WXS_BLCA_US_TCGA	FALSE	PROF					0.125132	FALSE	DO479	0	TCGA-CF-A3MF	TRUE	TCGA-CF-A3MF-01A-12D-A21A-08	3.10565e-05	3.23506e-07	5.11106e-06	1.15351e-07	2.67566e-05
DO480_TCGA-K4-A3WS-01A-11D-A22Z-08	bladder	ICGC_WXS_BLCA_US_TCGA	FALSE	PROF					0.133773	FALSE	DO480	0	TCGA-K4-A3WS	TRUE	TCGA-K4-A3WS-01A-11D-A22Z-08	0.000199632	2.0795e-06	7.09182e-06	1.86157e-06	0.000193676
DO481_TCGA-DK-A3WW-01A-22D-A23M-08	bladder	ICGC_WXS_BLCA_US_TCGA	FALSE	PROF					0.129864	FALSE	DO481	0	TCGA-DK-A3WW	TRUE	TCGA-DK-A3WW-01A-22D-A23M-08	0.00098835	1.02953e-05	7.78061e-05	7.36006e-06	0.000972962
DO482_TCGA-GV-A3JW-01A-11D-A20D-08	bladder	ICGC_WXS_BLCA_US_TCGA	FALSE	PROF					0.116094	FALSE	DO482	0	TCGA-GV-A3JW	TRUE	TCGA-GV-A3JW-01A-11D-A20D-08	6.90916e-05	7.19704e-07	8.52427e-06	3.80375e-07	6.83133e-05
DO483_TCGA-DK-A1A7-01A-11D-A13W-08	bladder	ICGC_WXS_BLCA_US_TCGA	FALSE	PROF					0.129543	FALSE	DO483	0	TCGA-DK-A1A7	TRUE	TCGA-DK-A1A7-01A-11D-A13W-08	0.000194663	2.02774e-06	1.3343e-05	1.53577e-06	0.000184845
DO484_TCGA-FJ-A3ZE-01A-11D-A23M-08	bladder	ICGC_WXS_BLCA_US_TCGA	FALSE	PROF					0.12187	FALSE	DO484	0	TCGA-FJ-A3ZE	TRUE	TCGA-FJ-A3ZE-01A-11D-A23M-08	0.000291753	3.0391e-06	1.04202e-05	2.71818e-06	0.000294447
DO48501_TCGA-DK-A6B0-01A-11D-A31L-08	bladder	ICGC_WXS_BLCA_US_TCGA	FALSE	PROF					0.161239	FALSE	DO48501	0	TCGA-DK-A6B0	TRUE	TCGA-DK-A6B0-01A-11D-A31L-08	1.95077e-05	2.03205e-07	1.68264e-06	1.38882e-07	1.82586e-05
DO48504_TCGA-GD-A6C6-01A-21D-A31L-08	bladder	ICGC_WXS_BLCA_US_TCGA	FALSE	PROF					0.109003	FALSE	DO48504	0	TCGA-GD-A6C6	TRUE	TCGA-GD-A6C6-01A-21D-A31L-08	0.000217764	2.26838e-06	1.5034e-05	1.71335e-06	0.000219712
DO48524_TCGA-PQ-A6FI-01A-11D-A31L-08	bladder	ICGC_WXS_BLCA_US_TCGA	FALSE	PROF					0.10376	FALSE	DO48524	0	TCGA-PQ-A6FI	TRUE	TCGA-PQ-A6FI-01A-11D-A31L-08	0.00011902	1.23979e-06	9.34945e-06	8.87194e-07	0.00012472
DO48534_TCGA-DK-A6B1-01A-12D-A30E-08	bladder	ICGC_WXS_BLCA_US_TCGA	FALSE	PROF					0.174542	FALSE	DO48534	0	TCGA-DK-A6B1	TRUE	TCGA-DK-A6B1-01A-12D-A30E-08	0.000123068	1.28196e-06	1.30532e-05	7.70166e-07	0.000125413
DO48543_TCGA-DK-A6B2-01A-11D-A30E-08	bladder	ICGC_WXS_BLCA_US_TCGA	FALSE	PROF					0.149731	FALSE	DO48543	0	TCGA-DK-A6B2	TRUE	TCGA-DK-A6B2-01A-11D-A30E-08	0.000162829	1.69613e-06	1.49262e-05	1.12091e-06	0.000164138
DO48551_TCGA-DK-A6B5-01A-11D-A31L-08	bladder	ICGC_WXS_BLCA_US_TCGA	FALSE	PROF					0.125622	FALSE	DO48551	0	TCGA-DK-A6B5	TRUE	TCGA-DK-A6B5-01A-11D-A31L-08	0.000103614	1.07931e-06	5.40364e-06	8.91301e-07	0.000103288
DO48566_TCGA-DK-A6AW-01A-11D-A30E-08	bladder	ICGC_WXS_BLCA_US_TCGA	FALSE	POLEd	P286R			MSH2	0.110963	FALSE	DO48566	0	TCGA-DK-A6AW	TRUE	TCGA-DK-A6AW-01A-11D-A30E-08	0.00416356	4.33704e-05	0.000667752	1.62234e-05	0.0040015
DO48575_TCGA-DK-A6AV-01A-12D-A30E-08	bladder	ICGC_WXS_BLCA_US_TCGA	FALSE	PROF					0.107308	FALSE	DO48575	0	TCGA-DK-A6AV	TRUE	TCGA-DK-A6AV-01A-12D-A30E-08	0.000104672	1.09033e-06	1.0692e-05	6.72872e-07	0.00010142
DO48576_TCGA-DK-A6B6-01A-11D-A30E-08	bladder	ICGC_WXS_BLCA_US_TCGA	FALSE	PROF					0.203598	FALSE	DO48576	0	TCGA-DK-A6B6	TRUE	TCGA-DK-A6B6-01A-11D-A30E-08	0.00077226	8.04437e-06	6.67449e-05	5.49218e-06	0.000786134
DO48579_TCGA-PQ-A6FN-01A-11D-A31L-08	bladder	ICGC_WXS_BLCA_US_TCGA	FALSE	PROF					0.132293	FALSE	DO48579	0	TCGA-PQ-A6FN	TRUE	TCGA-PQ-A6FN-01A-11D-A31L-08	7.0538e-05	7.34771e-07	5.44741e-06	5.29873e-07	6.80452e-05
DO48583_TCGA-E7-A7DV-01A-11D-A339-08	bladder	ICGC_WXS_BLCA_US_TCGA	FALSE	PROF					0.148602	FALSE	DO48583	0	TCGA-E7-A7DV	TRUE	TCGA-E7-A7DV-01A-11D-A339-08	0.000471566	4.91214e-06	1.64878e-05	4.40885e-06	0.000450013
DO485_TCGA-GU-A42Q-01A-11D-A23U-08	bladder	ICGC_WXS_BLCA_US_TCGA	FALSE	PROF					0.141865	FALSE	DO485	0	TCGA-GU-A42Q	TRUE	TCGA-GU-A42Q-01A-11D-A23U-08	0.000149667	1.55903e-06	1.29362e-05	1.06437e-06	0.000148782
DO48611_TCGA-K4-A54R-01A-11D-A26M-08	bladder	ICGC_WXS_BLCA_US_TCGA	FALSE	PROF					0.136967	FALSE	DO48611	0	TCGA-K4-A54R	TRUE	TCGA-K4-A54R-01A-11D-A26M-08	0.000712018	7.41685e-06	4.72825e-05	5.68356e-06	0.000704946
DO486_TCGA-CF-A1HS-01A-11D-A13W-08	bladder	ICGC_WXS_BLCA_US_TCGA	FALSE	PROF					0.146216	FALSE	DO486	0	TCGA-CF-A1HS	TRUE	TCGA-CF-A1HS-01A-11D-A13W-08	0.000198427	2.06695e-06	9.89395e-06	1.72665e-06	0.000187003
DO488_TCGA-CU-A0YN-01A-21D-A10S-08	bladder	ICGC_WXS_BLCA_US_TCGA	FALSE	PROF					0.138733	FALSE	DO488	0	TCGA-CU-A0YN	TRUE	TCGA-CU-A0YN-01A-21D-A10S-08	0.000127761	1.33084e-06	9.34945e-06	9.82207e-07	0.000128759
DO490_TCGA-FD-A3SN-01A-12D-A22Z-08	bladder	ICGC_WXS_BLCA_US_TCGA	FALSE	PROF					0.180469	FALSE	DO490	0	TCGA-FD-A3SN	TRUE	TCGA-FD-A3SN-01A-12D-A22Z-08	0.000330666	3.44443e-06	3.15263e-05	2.22348e-06	0.000338622
DO492_TCGA-CF-A3MI-01A-11D-A20D-08	bladder	ICGC_WXS_BLCA_US_TCGA	FALSE	PROF					0.155379	FALSE	DO492	0	TCGA-CF-A3MI	TRUE	TCGA-CF-A3MI-01A-11D-A20D-08	6.90489e-05	7.19259e-07	9.86758e-06	3.21506e-07	6.8843e-05
DO494_TCGA-H4-A2HO-01A-11D-A17V-08	bladder	ICGC_WXS_BLCA_US_TCGA	FALSE	PROF					0.136366	FALSE	DO494	0	TCGA-H4-A2HO	TRUE	TCGA-H4-A2HO-01A-11D-A17V-08	0.000290733	3.02847e-06	8.72295e-06	2.78088e-06	0.000288821
DO496_TCGA-GD-A2C5-01A-12D-A17V-08	bladder	ICGC_WXS_BLCA_US_TCGA	FALSE	PROF					0.16446	FALSE	DO496	0	TCGA-GD-A2C5	TRUE	TCGA-GD-A2C5-01A-12D-A17V-08	0.000254489	2.65093e-06	2.07789e-05	1.86276e-06	0.000241404
DO49724_TCGA-BT-A42B-01A-32D-A23M-08	bladder	ICGC_WXS_BLCA_US_TCGA	FALSE	PROF					0.11612	FALSE	DO49724	0	TCGA-BT-A42B	TRUE	TCGA-BT-A42B-01A-32D-A23M-08	6.71794e-05	6.99785e-07	8.88398e-06	3.43951e-07	6.83415e-05
DO49725_TCGA-BT-A42C-01A-11D-A23M-08	bladder	ICGC_WXS_BLCA_US_TCGA	FALSE	PROF					0.116597	FALSE	DO49725	0	TCGA-BT-A42C	TRUE	TCGA-BT-A42C-01A-11D-A23M-08	0.000299755	3.12245e-06	1.99933e-05	2.38893e-06	0.000296797
DO49726_TCGA-BT-A42F-01A-11D-A23U-08	bladder	ICGC_WXS_BLCA_US_TCGA	FALSE	PROF					0.131327	FALSE	DO49726	0	TCGA-BT-A42F	TRUE	TCGA-BT-A42F-01A-11D-A23U-08	0.00012208	1.27167e-06	7.83558e-06	9.86281e-07	0.000123902
DO49734_TCGA-CU-A72E-01A-12D-A339-08	bladder	ICGC_WXS_BLCA_US_TCGA	FALSE	PROF					0.121844	FALSE	DO49734	0	TCGA-CU-A72E	TRUE	TCGA-CU-A72E-01A-12D-A339-08	8.36239e-05	8.71082e-07	8.26361e-06	5.49668e-07	8.24121e-05
DO49753_TCGA-FD-A6TA-01A-12D-A339-08	bladder	ICGC_WXS_BLCA_US_TCGA	FALSE	PROF					0.130597	FALSE	DO49753	0	TCGA-FD-A6TA	TRUE	TCGA-FD-A6TA-01A-12D-A339-08	0.000187331	1.95136e-06	1.20534e-05	1.51214e-06	0.000194332
DO49755_TCGA-FD-A6TC-01A-21D-A339-08	bladder	ICGC_WXS_BLCA_US_TCGA	FALSE	PROF					0.122437	FALSE	DO49755	0	TCGA-FD-A6TC	TRUE	TCGA-FD-A6TC-01A-21D-A339-08	0.000753828	7.85237e-06	5.08491e-05	5.98295e-06	0.000747767
DO49757_TCGA-FD-A6TD-01A-51D-A339-08	bladder	ICGC_WXS_BLCA_US_TCGA	FALSE	PROF					0.14283	FALSE	DO49757	0	TCGA-FD-A6TD	TRUE	TCGA-FD-A6TD-01A-51D-A339-08	0.000112807	1.17507e-06	1.05973e-05	7.6541e-07	0.000112088
DO49759_TCGA-FD-A6TE-01A-12D-A339-08	bladder	ICGC_WXS_BLCA_US_TCGA	FALSE	PROF					0.18874	FALSE	DO49759	0	TCGA-FD-A6TE	TRUE	TCGA-FD-A6TE-01A-12D-A339-08	0.000237036	2.46913e-06	1.2975e-05	2.01235e-06	0.000230229
DO49760_TCGA-FD-A6TG-01A-11D-A32B-08	bladder	ICGC_WXS_BLCA_US_TCGA	FALSE	PROF					0.113315	FALSE	DO49760	0	TCGA-FD-A6TG	TRUE	TCGA-FD-A6TG-01A-11D-A32B-08	0.000314783	3.27899e-06	1.7007e-05	2.68212e-06	0.000304201
DO49763_TCGA-FD-A6TH-01A-11D-A32B-08	bladder	ICGC_WXS_BLCA_US_TCGA	FALSE	PROF					0.126286	FALSE	DO49763	0	TCGA-FD-A6TH	TRUE	TCGA-FD-A6TH-01A-11D-A32B-08	0.000136282	1.41961e-06	1.31517e-05	9.09519e-07	0.000131406
DO49764_TCGA-FD-A6TI-01A-11D-A32B-08	bladder	ICGC_WXS_BLCA_US_TCGA	FALSE	PROF					0.211929	FALSE	DO49764	0	TCGA-FD-A6TI	TRUE	TCGA-FD-A6TI-01A-11D-A32B-08	0.000110456	1.15059e-06	1.31509e-05	6.28837e-07	0.000109723
DO49770_TCGA-GC-A6I1-01A-12D-A31L-08	bladder	ICGC_WXS_BLCA_US_TCGA	FALSE	PROF					0.118422	FALSE	DO49770	0	TCGA-GC-A6I1	TRUE	TCGA-GC-A6I1-01A-12D-A31L-08	0.000192099	2.00104e-06	1.42662e-05	1.46777e-06	0.000189101
DO49776_TCGA-GV-A6ZA-01A-12D-A339-08	bladder	ICGC_WXS_BLCA_US_TCGA	FALSE	PROF					0.115845	FALSE	DO49776	0	TCGA-GV-A6ZA	TRUE	TCGA-GV-A6ZA-01A-12D-A339-08	0.000270952	2.82241e-06	2.54292e-05	1.83951e-06	0.000256157
DO49784_TCGA-K4-A5RJ-01A-11D-A289-08	bladder	ICGC_WXS_BLCA_US_TCGA	FALSE	PROF					0.130959	FALSE	DO49784	0	TCGA-K4-A5RJ	TRUE	TCGA-K4-A5RJ-01A-11D-A289-08	0.000275962	2.8746e-06	1.80734e-05	2.21378e-06	0.000271298
DO49787_TCGA-K4-A83P-01A-11D-A34U-08	bladder	ICGC_WXS_BLCA_US_TCGA	FALSE	PROF					0.136719	FALSE	DO49787	0	TCGA-K4-A83P	TRUE	TCGA-K4-A83P-01A-11D-A34U-08	0.000208763	2.17462e-06	1.38495e-05	1.66701e-06	0.000204953
DO49795_TCGA-XF-A8HD-01A-11D-A364-08	bladder	ICGC_WXS_BLCA_US_TCGA	FALSE	PROF					0.16407	FALSE	DO49795	0	TCGA-XF-A8HD	TRUE	TCGA-XF-A8HD-01A-11D-A364-08	0.000386636	4.02746e-06	3.16097e-05	2.82823e-06	0.000374628
DO49797_TCGA-XF-A8HE-01A-11D-A364-08	bladder	ICGC_WXS_BLCA_US_TCGA	FALSE	PROF					0.142466	FALSE	DO49797	0	TCGA-XF-A8HE	TRUE	TCGA-XF-A8HE-01A-11D-A364-08	0.000323237	3.36705e-06	2.44243e-05	2.45152e-06	0.000321193
DO49800_TCGA-XF-A8HF-01A-11D-A364-08	bladder	ICGC_WXS_BLCA_US_TCGA	FALSE	PROF					0.125025	FALSE	DO49800	0	TCGA-XF-A8HF	TRUE	TCGA-XF-A8HF-01A-11D-A364-08	0.0001057	1.10104e-06	5.99786e-06	8.88134e-07	0.000107674
DO49802_TCGA-XF-A8HG-01A-11D-A364-08	bladder	ICGC_WXS_BLCA_US_TCGA	FALSE						0.657556	FALSE	DO49802	0	TCGA-XF-A8HG	TRUE	TCGA-XF-A8HG-01A-11D-A364-08	0.000268518	2.79707e-06	2.50434e-05	1.82983e-06	0.000252863
DO49806_TCGA-YC-A8S6-01A-31D-A38G-08	bladder	ICGC_WXS_BLCA_US_TCGA	FALSE	PROF					0.14234	FALSE	DO49806	0	TCGA-YC-A8S6	TRUE	TCGA-YC-A8S6-01A-31D-A38G-08	8.6166e-05	8.97562e-07	1.00853e-05	4.98095e-07	7.94576e-05
DO498_TCGA-DK-A1AE-01A-11D-A13W-08	bladder	ICGC_WXS_BLCA_US_TCGA	FALSE						0.276554	FALSE	DO498	0	TCGA-DK-A1AE	TRUE	TCGA-DK-A1AE-01A-11D-A13W-08	9.77819e-05	1.01856e-06	7.21402e-06	7.49193e-07	9.83052e-05
DO500_TCGA-FJ-A3ZF-01A-11D-A23M-08	bladder	ICGC_WXS_BLCA_US_TCGA	FALSE	PROF					0.114264	FALSE	DO500	0	TCGA-FJ-A3ZF	TRUE	TCGA-FJ-A3ZF-01A-11D-A23M-08	0.000222205	2.31463e-06	1.77416e-05	1.64389e-06	0.000218734
DO502_TCGA-FD-A43N-01A-11D-A23U-08	bladder	ICGC_WXS_BLCA_US_TCGA	FALSE	PROF					0.119956	FALSE	DO502	0	TCGA-FD-A43N	TRUE	TCGA-FD-A43N-01A-11D-A23U-08	0.000169832	1.76908e-06	2.13952e-05	9.1577e-07	0.000164131
DO504_TCGA-BT-A0S7-01A-11D-A10S-08	bladder	ICGC_WXS_BLCA_US_TCGA	FALSE	PROF					0.139162	FALSE	DO504	0	TCGA-BT-A0S7	TRUE	TCGA-BT-A0S7-01A-11D-A10S-08	3.29151e-05	3.42866e-07	3.72594e-06	1.95776e-07	3.54355e-05
DO506_TCGA-GD-A3OQ-01A-32D-A21Z-08	bladder	ICGC_WXS_BLCA_US_TCGA	FALSE	PROF					0.137742	FALSE	DO506	0	TCGA-GD-A3OQ	TRUE	TCGA-GD-A3OQ-01A-32D-A21Z-08	9.08384e-05	9.46233e-07	1.19915e-05	4.66004e-07	8.93478e-05
DO508_TCGA-C4-A0F6-01A-11D-A10S-08	bladder	ICGC_WXS_BLCA_US_TCGA	FALSE	PROF					0.122135	FALSE	DO508	0	TCGA-C4-A0F6	TRUE	TCGA-C4-A0F6-01A-11D-A10S-08	0.000167228	1.74195e-06	1.60045e-05	1.12184e-06	0.000169386
DO510_TCGA-GC-A3RD-01A-12D-A22Z-08	bladder	ICGC_WXS_BLCA_US_TCGA	FALSE	PROF					0.142728	FALSE	DO510	0	TCGA-GC-A3RD	TRUE	TCGA-GC-A3RD-01A-12D-A22Z-08	7.47288e-05	7.78425e-07	7.49209e-06	4.86527e-07	7.52283e-05
DO512_TCGA-G2-A3IB-01A-11D-A20D-08	bladder	ICGC_WXS_BLCA_US_TCGA	FALSE	PROF					0.117333	FALSE	DO512	0	TCGA-G2-A3IB	TRUE	TCGA-G2-A3IB-01A-11D-A20D-08	6.83143e-05	7.11607e-07	5.5193e-06	5.02577e-07	7.18288e-05
DO514_TCGA-DK-A1AC-01A-11D-A13W-08	bladder	ICGC_WXS_BLCA_US_TCGA	FALSE	PROF					0.156665	FALSE	DO514	0	TCGA-DK-A1AC	TRUE	TCGA-DK-A1AC-01A-11D-A13W-08	0.00124306	1.29486e-05	0.000105099	8.94207e-06	0.00123467
DO516_TCGA-BT-A0YX-01A-11D-A10S-08	bladder	ICGC_WXS_BLCA_US_TCGA	FALSE	PROF					0.144869	FALSE	DO516	0	TCGA-BT-A0YX	TRUE	TCGA-BT-A0YX-01A-11D-A10S-08	0.000522013	5.43764e-06	3.33597e-05	4.22363e-06	0.000512046
DO51859_TCGA-2F-A9KO-01A-11D-A38G-08	bladder	ICGC_WXS_BLCA_US_TCGA	FALSE	PROF					0.123554	FALSE	DO51859	0	TCGA-2F-A9KO	TRUE	TCGA-2F-A9KO-01A-11D-A38G-08	0.000400844	4.17545e-06	2.14739e-05	3.42335e-06	0.000406584
DO51860_TCGA-2F-A9KP-01A-11D-A38G-08	bladder	ICGC_WXS_BLCA_US_TCGA	FALSE	PROF					0.142299	FALSE	DO51860	0	TCGA-2F-A9KP	TRUE	TCGA-2F-A9KP-01A-11D-A38G-08	0.000122312	1.27408e-06	1.43144e-05	7.07112e-07	0.000120043
DO51861_TCGA-2F-A9KQ-01A-11D-A38G-08	bladder	ICGC_WXS_BLCA_US_TCGA	FALSE	PROF					0.110666	FALSE	DO51861	0	TCGA-2F-A9KQ	TRUE	TCGA-2F-A9KQ-01A-11D-A38G-08	5.86632e-05	6.11075e-07	7.2366e-06	3.23009e-07	5.80586e-05
DO51862_TCGA-2F-A9KR-01A-11D-A38G-08	bladder	ICGC_WXS_BLCA_US_TCGA	FALSE	PROF					0.102376	FALSE	DO51862	0	TCGA-2F-A9KR	TRUE	TCGA-2F-A9KR-01A-11D-A38G-08	0.000192261	2.00272e-06	1.8134e-05	1.30136e-06	0.000199144
DO51863_TCGA-2F-A9KT-01A-11D-A38G-08	bladder	ICGC_WXS_BLCA_US_TCGA	FALSE					MSH6	0.211836	FALSE	DO51863	0	TCGA-2F-A9KT	TRUE	TCGA-2F-A9KT-01A-11D-A38G-08	0.000268232	2.79408e-06	1.93726e-05	2.07328e-06	0.00025874
DO51864_TCGA-2F-A9KW-01A-11D-A38G-08	bladder	ICGC_WXS_BLCA_US_TCGA	FALSE	PROF					0.114595	FALSE	DO51864	0	TCGA-2F-A9KW	TRUE	TCGA-2F-A9KW-01A-11D-A38G-08	9.3425e-05	9.73178e-07	9.67706e-06	5.94748e-07	9.34619e-05
DO51865_TCGA-4Z-AA7O-01A-31D-A391-08	bladder	ICGC_WXS_BLCA_US_TCGA	FALSE	PROF					0.11036	FALSE	DO51865	0	TCGA-4Z-AA7O	TRUE	TCGA-4Z-AA7O-01A-31D-A391-08	0.000166434	1.73369e-06	1.63932e-05	1.09632e-06	0.000167775
DO51866_TCGA-4Z-AA7R-01A-11D-A391-08	bladder	ICGC_WXS_BLCA_US_TCGA	FALSE	PROF					0.104762	FALSE	DO51866	0	TCGA-4Z-AA7R	TRUE	TCGA-4Z-AA7R-01A-11D-A391-08	0.000281129	2.92842e-06	2.28224e-05	2.06347e-06	0.000271368
DO51867_TCGA-4Z-AA7Y-01A-11D-A391-08	bladder	ICGC_WXS_BLCA_US_TCGA	FALSE	PROF					0.11679	FALSE	DO51867	0	TCGA-4Z-AA7Y	TRUE	TCGA-4Z-AA7Y-01A-11D-A391-08	0.000225144	2.34525e-06	1.40967e-05	1.83432e-06	0.000222156
DO51868_TCGA-4Z-AA81-01A-11D-A391-08	bladder	ICGC_WXS_BLCA_US_TCGA	FALSE	PROF					0.135346	FALSE	DO51868	0	TCGA-4Z-AA81	TRUE	TCGA-4Z-AA81-01A-11D-A391-08	0.000165989	1.72905e-06	1.41349e-05	1.18967e-06	0.000169515
DO51869_TCGA-4Z-AA83-01A-11D-A391-08	bladder	ICGC_WXS_BLCA_US_TCGA	FALSE	PROF					0.157906	FALSE	DO51869	0	TCGA-4Z-AA83	TRUE	TCGA-4Z-AA83-01A-11D-A391-08	7.43865e-05	7.7486e-07	7.48518e-06	4.83107e-07	8.15055e-05
DO51870_TCGA-CF-A5U8-01A-11D-A289-08	bladder	ICGC_WXS_BLCA_US_TCGA	FALSE	PROF					0.132195	FALSE	DO51870	0	TCGA-CF-A5U8	TRUE	TCGA-CF-A5U8-01A-11D-A289-08	4.88548e-05	5.08904e-07	3.81866e-06	3.65002e-07	5.13434e-05
DO51871_TCGA-CF-A5UA-01A-11D-A289-08	bladder	ICGC_WXS_BLCA_US_TCGA	FALSE	PROF					0.189952	FALSE	DO51871	0	TCGA-CF-A5UA	TRUE	TCGA-CF-A5UA-01A-11D-A289-08	8.14099e-05	8.4802e-07	1.13888e-05	3.89724e-07	7.74883e-05
DO51872_TCGA-DK-AA6T-01A-11D-A391-08	bladder	ICGC_WXS_BLCA_US_TCGA	FALSE	PROF					0.148221	FALSE	DO51872	0	TCGA-DK-AA6T	TRUE	TCGA-DK-AA6T-01A-11D-A391-08	8.09809e-05	8.43551e-07	8.06434e-06	5.29603e-07	8.10927e-05
DO51873_TCGA-DK-AA6X-01A-12D-A42E-08	bladder	ICGC_WXS_BLCA_US_TCGA	FALSE	PROF					0.14428	FALSE	DO51873	0	TCGA-DK-AA6X	TRUE	TCGA-DK-AA6X-01A-12D-A42E-08	9.09463e-05	9.47357e-07	8.55596e-06	6.16548e-07	9.28423e-05
DO51874_TCGA-E7-A6ME-01A-22D-A32B-08	bladder	ICGC_WXS_BLCA_US_TCGA	FALSE	PROF					0.13211	FALSE	DO51874	0	TCGA-E7-A6ME	TRUE	TCGA-E7-A6ME-01A-22D-A32B-08	0.00010581	1.10219e-06	5.84929e-06	8.9579e-07	0.000108624
DO51876_TCGA-E7-A6MF-01A-12D-A32B-08	bladder	ICGC_WXS_BLCA_US_TCGA	FALSE	PROF					0.110591	FALSE	DO51876	0	TCGA-E7-A6MF	TRUE	TCGA-E7-A6MF-01A-12D-A32B-08	3.24932e-05	3.38471e-07	2.29706e-06	2.53315e-07	3.2362e-05
DO51878_TCGA-E7-A7XN-01A-11D-A34U-08	bladder	ICGC_WXS_BLCA_US_TCGA	FALSE					MSH2	0.132405	FALSE	DO51878	0	TCGA-E7-A7XN	TRUE	TCGA-E7-A7XN-01A-11D-A34U-08	0.000713458	7.43186e-06	4.17173e-05	5.94119e-06	0.000701148
DO51879_TCGA-FD-A6TB-01A-12D-A339-08	bladder	ICGC_WXS_BLCA_US_TCGA	FALSE	PROF					0.148361	FALSE	DO51879	0	TCGA-FD-A6TB	TRUE	TCGA-FD-A6TB-01A-12D-A339-08	0.000182847	1.90466e-06	1.61697e-05	1.28444e-06	0.00016943
DO51880_TCGA-FD-A6TF-01A-52D-A32B-08	bladder	ICGC_WXS_BLCA_US_TCGA	FALSE	PROF					0.131557	FALSE	DO51880	0	TCGA-FD-A6TF	TRUE	TCGA-FD-A6TF-01A-52D-A32B-08	0.000114664	1.19442e-06	8.03069e-06	8.97191e-07	0.000106502
DO51881_TCGA-FD-A6TK-01A-42D-A339-08	bladder	ICGC_WXS_BLCA_US_TCGA	FALSE	PROF					0.134215	FALSE	DO51881	0	TCGA-FD-A6TK	TRUE	TCGA-FD-A6TK-01A-42D-A339-08	0.000101283	1.05503e-06	8.67459e-06	7.23744e-07	9.97499e-05
DO51882_TCGA-G2-AA3B-01A-11D-A391-08	bladder	ICGC_WXS_BLCA_US_TCGA	FALSE	PROF					0.128778	FALSE	DO51882	0	TCGA-G2-AA3B	TRUE	TCGA-G2-AA3B-01A-11D-A391-08	0.000531602	5.53753e-06	2.8271e-05	4.54911e-06	0.000528614
DO51883_TCGA-G2-AA3C-01A-21D-A391-08	bladder	ICGC_WXS_BLCA_US_TCGA	FALSE	PROF					0.135199	FALSE	DO51883	0	TCGA-G2-AA3C	TRUE	TCGA-G2-AA3C-01A-21D-A391-08	0.000186774	1.94556e-06	1.48236e-05	1.38565e-06	0.000190945
DO51884_TCGA-G2-AA3D-01A-11D-A391-08	bladder	ICGC_WXS_BLCA_US_TCGA	FALSE	PROF					0.133857	FALSE	DO51884	0	TCGA-G2-AA3D	TRUE	TCGA-G2-AA3D-01A-11D-A391-08	0.000175837	1.83163e-06	9.25102e-06	1.50905e-06	0.000170908
DO51885_TCGA-G2-AA3F-01A-12D-A42E-08	bladder	ICGC_WXS_BLCA_US_TCGA	FALSE	PROF					0.168666	FALSE	DO51885	0	TCGA-G2-AA3F	TRUE	TCGA-G2-AA3F-01A-12D-A42E-08	0.000106578	1.11019e-06	7.96805e-06	8.12022e-07	0.00010967
DO51886_TCGA-GD-A76B-01A-11D-A32B-08	bladder	ICGC_WXS_BLCA_US_TCGA	FALSE	PROF					0.17638	FALSE	DO51886	0	TCGA-GD-A76B	TRUE	TCGA-GD-A76B-01A-11D-A32B-08	0.000157713	1.64284e-06	1.46123e-05	1.07895e-06	0.000155147
DO51887_TCGA-GU-A762-01A-11D-A339-08	bladder	ICGC_WXS_BLCA_US_TCGA	FALSE	PROF					0.135722	FALSE	DO51887	0	TCGA-GU-A762	TRUE	TCGA-GU-A762-01A-11D-A339-08	9.54285e-05	9.94047e-07	8.14992e-06	6.82922e-07	9.95548e-05
DO51888_TCGA-GU-A763-01A-11D-A32B-08	bladder	ICGC_WXS_BLCA_US_TCGA	FALSE	PROF					0.10959	FALSE	DO51888	0	TCGA-GU-A763	TRUE	TCGA-GU-A763-01A-11D-A32B-08	5.20724e-05	5.42421e-07	3.87787e-06	3.97401e-07	5.6855e-05
DO51889_TCGA-GU-A764-01A-11D-A34U-08	bladder	ICGC_WXS_BLCA_US_TCGA	FALSE	PROF					0.131081	FALSE	DO51889	0	TCGA-GU-A764	TRUE	TCGA-GU-A764-01A-11D-A34U-08	0.000103467	1.07778e-06	8.07505e-06	7.73549e-07	0.000100726
DO51891_TCGA-GU-A766-01A-11D-A32B-08	bladder	ICGC_WXS_BLCA_US_TCGA	FALSE	PROF					0.131802	FALSE	DO51891	0	TCGA-GU-A766	TRUE	TCGA-GU-A766-01A-11D-A32B-08	0.000161522	1.68252e-06	1.56153e-05	1.07674e-06	0.000157639
DO51892_TCGA-GU-A767-01A-11D-A32B-08	bladder	ICGC_WXS_BLCA_US_TCGA	FALSE	PROF					0.129317	FALSE	DO51892	0	TCGA-GU-A767	TRUE	TCGA-GU-A767-01A-11D-A32B-08	0.000301912	3.14491e-06	1.77335e-05	2.51063e-06	0.000295217
DO51893_TCGA-GU-AATO-01A-11D-A391-08	bladder	ICGC_WXS_BLCA_US_TCGA	FALSE	PROF					0.140781	FALSE	DO51893	0	TCGA-GU-AATO	TRUE	TCGA-GU-AATO-01A-11D-A391-08	0.000242973	2.53097e-06	1.57686e-05	1.95542e-06	0.000231818
DO51894_TCGA-GU-AATP-01A-11D-A391-08	bladder	ICGC_WXS_BLCA_US_TCGA	FALSE	PROF					0.113558	FALSE	DO51894	0	TCGA-GU-AATP	TRUE	TCGA-GU-AATP-01A-11D-A391-08	0.000244465	2.54651e-06	1.91579e-05	1.82428e-06	0.000257924
DO51896_TCGA-GU-AATQ-01A-11D-A391-08	bladder	ICGC_WXS_BLCA_US_TCGA	FALSE	PROF					0.115288	FALSE	DO51896	0	TCGA-GU-AATQ	TRUE	TCGA-GU-AATQ-01A-11D-A391-08	0.00014554	1.51604e-06	8.72414e-06	1.20264e-06	0.000137531
DO51898_TCGA-HQ-A2OF-01A-11D-A26M-08	bladder	ICGC_WXS_BLCA_US_TCGA	FALSE	PROF					0.113403	FALSE	DO51898	0	TCGA-HQ-A2OF	TRUE	TCGA-HQ-A2OF-01A-11D-A26M-08	0.000146762	1.52878e-06	2.7386e-05	4.04551e-07	0.00013633
DO51899_TCGA-HQ-A5ND-01A-11D-A26M-08	bladder	ICGC_WXS_BLCA_US_TCGA	FALSE	PROF					0.127225	FALSE	DO51899	0	TCGA-HQ-A5ND	TRUE	TCGA-HQ-A5ND-01A-11D-A26M-08	7.07685e-05	7.37172e-07	6.8779e-06	4.70183e-07	7.76898e-05
DO518_TCGA-GC-A3OO-01A-11D-A22Z-08	bladder	ICGC_WXS_BLCA_US_TCGA	FALSE	PROF					0.169506	FALSE	DO518	0	TCGA-GC-A3OO	TRUE	TCGA-GC-A3OO-01A-11D-A22Z-08	0.000103077	1.07372e-06	7.25999e-06	8.04749e-07	0.000102549
DO51900_TCGA-HQ-A5NE-01A-12D-A289-08	bladder	ICGC_WXS_BLCA_US_TCGA	FALSE	PROF					0.137003	FALSE	DO51900	0	TCGA-HQ-A5NE	TRUE	TCGA-HQ-A5NE-01A-12D-A289-08	0.000307688	3.20509e-06	2.17219e-05	2.40001e-06	0.000298691
DO51901_TCGA-LT-A8JT-01A-11D-A364-08	bladder	ICGC_WXS_BLCA_US_TCGA	FALSE	PROF					0.116028	FALSE	DO51901	0	TCGA-LT-A8JT	TRUE	TCGA-LT-A8JT-01A-11D-A364-08	6.52661e-05	6.79855e-07	7.44337e-06	3.85789e-07	7.02979e-05
DO51902_TCGA-R3-A69X-01A-22D-A30E-08	bladder	ICGC_WXS_BLCA_US_TCGA	FALSE	PROF					0.113262	FALSE	DO51902	0	TCGA-R3-A69X	TRUE	TCGA-R3-A69X-01A-22D-A30E-08	0.000174739	1.82019e-06	1.52267e-05	1.2373e-06	0.00016397
DO51903_TCGA-S5-A6DX-01A-11D-A31L-08	bladder	ICGC_WXS_BLCA_US_TCGA	FALSE	PROF					0.11693	FALSE	DO51903	0	TCGA-S5-A6DX	TRUE	TCGA-S5-A6DX-01A-11D-A31L-08	0.000577089	6.01134e-06	4.98163e-05	4.10678e-06	0.000559776
DO51904_TCGA-S5-AA26-01A-11D-A38G-08	bladder	ICGC_WXS_BLCA_US_TCGA	FALSE	PROF					0.112321	FALSE	DO51904	0	TCGA-S5-AA26	TRUE	TCGA-S5-AA26-01A-11D-A38G-08	0.000191149	1.99113e-06	1.41906e-05	1.46072e-06	0.000196001
DO51905_TCGA-SY-A9G0-01A-12D-A38G-08	bladder	ICGC_WXS_BLCA_US_TCGA	FALSE	PROF					0.140348	FALSE	DO51905	0	TCGA-SY-A9G0	TRUE	TCGA-SY-A9G0-01A-12D-A38G-08	4.43517e-05	4.61997e-07	5.12177e-06	2.59398e-07	4.49327e-05
DO51906_TCGA-SY-A9G5-01A-11D-A38G-08	bladder	ICGC_WXS_BLCA_US_TCGA	FALSE	PROF					0.123183	FALSE	DO51906	0	TCGA-SY-A9G5	TRUE	TCGA-SY-A9G5-01A-11D-A38G-08	0.000778081	8.10501e-06	5.19741e-05	6.19766e-06	0.000770932
DO51907_TCGA-XF-A8HB-01A-11D-A364-08	bladder	ICGC_WXS_BLCA_US_TCGA	FALSE	PROF					0.155275	FALSE	DO51907	0	TCGA-XF-A8HB	TRUE	TCGA-XF-A8HB-01A-11D-A364-08	7.60874e-05	7.92577e-07	1.24021e-05	2.87813e-07	7.21342e-05
DO51908_TCGA-XF-A8HC-01A-11D-A364-08	bladder	ICGC_WXS_BLCA_US_TCGA	FALSE						0.35503	FALSE	DO51908	0	TCGA-XF-A8HC	TRUE	TCGA-XF-A8HC-01A-11D-A364-08	0.00013114	1.36604e-06	1.46243e-05	7.89589e-07	0.000127427
DO51909_TCGA-XF-A8HH-01A-11D-A38G-08	bladder	ICGC_WXS_BLCA_US_TCGA	FALSE	PROF					0.174901	FALSE	DO51909	0	TCGA-XF-A8HH	TRUE	TCGA-XF-A8HH-01A-11D-A38G-08	0.000108858	1.13393e-06	1.3059e-05	6.15454e-07	0.00010421
DO51911_TCGA-XF-A8HI-01A-11D-A38G-08	bladder	ICGC_WXS_BLCA_US_TCGA	FALSE	PROF					0.137157	FALSE	DO51911	0	TCGA-XF-A8HI	TRUE	TCGA-XF-A8HI-01A-11D-A38G-08	5.31984e-05	5.5415e-07	4.42892e-06	3.85682e-07	6.17723e-05
DO51912_TCGA-XF-A9SG-01A-12D-A42E-08	bladder	ICGC_WXS_BLCA_US_TCGA	FALSE	PROF					0.237968	FALSE	DO51912	0	TCGA-XF-A9SG	TRUE	TCGA-XF-A9SG-01A-12D-A42E-08	0.000161467	1.68195e-06	1.33529e-05	1.17452e-06	0.000162716
DO51913_TCGA-XF-A9SH-01A-11D-A391-08	bladder	ICGC_WXS_BLCA_US_TCGA	FALSE	PROF					0.144273	FALSE	DO51913	0	TCGA-XF-A9SH	TRUE	TCGA-XF-A9SH-01A-11D-A391-08	3.85728e-05	4.01799e-07	4.58995e-06	2.19706e-07	3.7006e-05
DO51914_TCGA-XF-A9SI-01A-11D-A391-08	bladder	ICGC_WXS_BLCA_US_TCGA	FALSE	PROF					0.17458	FALSE	DO51914	0	TCGA-XF-A9SI	TRUE	TCGA-XF-A9SI-01A-11D-A391-08	0.00026122	2.72105e-06	1.59691e-05	2.14504e-06	0.000250606
DO51915_TCGA-XF-A9SW-01A-11D-A42E-08	bladder	ICGC_WXS_BLCA_US_TCGA	FALSE	PROF					0.148889	FALSE	DO51915	0	TCGA-XF-A9SW	TRUE	TCGA-XF-A9SW-01A-11D-A42E-08	5.48024e-05	5.70858e-07	6.59306e-06	3.09023e-07	5.61026e-05
DO51916_TCGA-XF-A9SX-01A-21D-A391-08	bladder	ICGC_WXS_BLCA_US_TCGA	FALSE	PROF					0.12266	FALSE	DO51916	0	TCGA-XF-A9SX	TRUE	TCGA-XF-A9SX-01A-21D-A391-08	8.56191e-05	8.91866e-07	6.10858e-06	6.65052e-07	8.59724e-05
DO51918_TCGA-XF-A9SY-01A-21D-A42E-08	bladder	ICGC_WXS_BLCA_US_TCGA	FALSE	PROF					0.129031	FALSE	DO51918	0	TCGA-XF-A9SY	TRUE	TCGA-XF-A9SY-01A-21D-A42E-08	0.000318956	3.32246e-06	1.17614e-05	2.95555e-06	0.000317907
DO51919_TCGA-XF-A9SZ-01A-11D-A391-08	bladder	ICGC_WXS_BLCA_US_TCGA	FALSE	PROF					0.131165	FALSE	DO51919	0	TCGA-XF-A9SZ	TRUE	TCGA-XF-A9SZ-01A-11D-A391-08	0.00016993	1.7701e-06	1.39638e-05	1.23994e-06	0.000165343
DO51920_TCGA-XF-A9T0-01A-11D-A391-08	bladder	ICGC_WXS_BLCA_US_TCGA	FALSE	PROF					0.138731	FALSE	DO51920	0	TCGA-XF-A9T0	TRUE	TCGA-XF-A9T0-01A-11D-A391-08	0.000663103	6.90732e-06	5.29427e-05	4.90578e-06	0.000651267
DO51921_TCGA-XF-A9T2-01A-11D-A42E-08	bladder	ICGC_WXS_BLCA_US_TCGA	FALSE	PROF					0.123047	FALSE	DO51921	0	TCGA-XF-A9T2	TRUE	TCGA-XF-A9T2-01A-11D-A42E-08	7.47751e-05	7.78908e-07	7.36792e-06	4.92429e-07	7.35585e-05
DO51922_TCGA-XF-A9T3-01A-11D-A42E-08	bladder	ICGC_WXS_BLCA_US_TCGA	FALSE	PROF					0.143264	FALSE	DO51922	0	TCGA-XF-A9T3	TRUE	TCGA-XF-A9T3-01A-11D-A42E-08	0.000346934	3.6139e-06	1.75556e-05	3.00774e-06	0.000330412
DO51924_TCGA-XF-A9T4-01A-11D-A391-08	bladder	ICGC_WXS_BLCA_US_TCGA	FALSE	PROF					0.160584	FALSE	DO51924	0	TCGA-XF-A9T4	TRUE	TCGA-XF-A9T4-01A-11D-A391-08	3.51933e-05	3.66597e-07	4.50437e-06	1.86693e-07	3.85361e-05
DO51925_TCGA-XF-A9T5-01A-11D-A42E-08	bladder	ICGC_WXS_BLCA_US_TCGA	FALSE	PROF					0.12743	FALSE	DO51925	0	TCGA-XF-A9T5	TRUE	TCGA-XF-A9T5-01A-11D-A42E-08	0.00051863	5.4024e-06	2.88042e-05	4.38493e-06	0.000520045
DO51926_TCGA-XF-A9T6-01A-11D-A42E-08	bladder	ICGC_WXS_BLCA_US_TCGA	FALSE	PROF					0.147025	FALSE	DO51926	0	TCGA-XF-A9T6	TRUE	TCGA-XF-A9T6-01A-11D-A42E-08	0.000267594	2.78744e-06	2.02488e-05	2.02825e-06	0.000259293
DO51927_TCGA-XF-A9T8-01A-11D-A391-08	bladder	ICGC_WXS_BLCA_US_TCGA	FALSE	PROF					0.141662	FALSE	DO51927	0	TCGA-XF-A9T8	TRUE	TCGA-XF-A9T8-01A-11D-A391-08	0.000550527	5.73466e-06	3.72061e-05	4.36633e-06	0.000531397
DO51928_TCGA-XF-AAME-01A-12D-A42E-08	bladder	ICGC_WXS_BLCA_US_TCGA	FALSE	PROF					0.122578	FALSE	DO51928	0	TCGA-XF-AAME	TRUE	TCGA-XF-AAME-01A-12D-A42E-08	1.38386e-05	1.44152e-07	3.30583e-07	1.36047e-07	1.27701e-05
DO51930_TCGA-XF-AAMF-01A-21D-A42E-08	bladder	ICGC_WXS_BLCA_US_TCGA	FALSE	PROF					0.221677	FALSE	DO51930	0	TCGA-XF-AAMF	TRUE	TCGA-XF-AAMF-01A-21D-A42E-08	7.23423e-05	7.53566e-07	7.66544e-06	4.53049e-07	6.56638e-05
DO51931_TCGA-XF-AAMH-01A-11D-A42E-08	bladder	ICGC_WXS_BLCA_US_TCGA	FALSE	PROF					0.133538	FALSE	DO51931	0	TCGA-XF-AAMH	TRUE	TCGA-XF-AAMH-01A-11D-A42E-08	6.31432e-05	6.57742e-07	7.37446e-06	3.65711e-07	5.84934e-05
DO51932_TCGA-XF-AAMJ-01A-11D-A42E-08	bladder	ICGC_WXS_BLCA_US_TCGA	FALSE	PROF					0.153342	FALSE	DO51932	0	TCGA-XF-AAMJ	TRUE	TCGA-XF-AAMJ-01A-11D-A42E-08	4.8391e-05	5.04073e-07	8.23883e-06	1.67779e-07	4.56202e-05
DO51933_TCGA-XF-AAML-01A-11D-A42E-08	bladder	ICGC_WXS_BLCA_US_TCGA	FALSE	PROF					0.227471	FALSE	DO51933	0	TCGA-XF-AAML	TRUE	TCGA-XF-AAML-01A-11D-A42E-08	0.000388003	4.04169e-06	3.27705e-05	2.79262e-06	0.000391701
DO51934_TCGA-XF-AAMQ-01A-11D-A42E-08	bladder	ICGC_WXS_BLCA_US_TCGA	FALSE	PROF					0.179645	FALSE	DO51934	0	TCGA-XF-AAMQ	TRUE	TCGA-XF-AAMQ-01A-11D-A42E-08	0.000180836	1.88371e-06	1.61661e-05	1.26273e-06	0.000174466
DO51935_TCGA-XF-AAMR-01A-31D-A42E-08	bladder	ICGC_WXS_BLCA_US_TCGA	FALSE	PROF					0.129413	FALSE	DO51935	0	TCGA-XF-AAMR	TRUE	TCGA-XF-AAMR-01A-31D-A42E-08	8.7838e-05	9.14979e-07	1.01481e-05	5.1354e-07	8.76979e-05
DO51936_TCGA-XF-AAMT-01A-11D-A42E-08	bladder	ICGC_WXS_BLCA_US_TCGA	FALSE	PROF					0.117578	FALSE	DO51936	0	TCGA-XF-AAMT	TRUE	TCGA-XF-AAMT-01A-11D-A42E-08	7.86734e-05	8.19515e-07	6.05409e-06	5.91924e-07	7.47808e-05
DO51938_TCGA-XF-AAMW-01A-11D-A42E-08	bladder	ICGC_WXS_BLCA_US_TCGA	FALSE	PROF					0.131581	FALSE	DO51938	0	TCGA-XF-AAMW	TRUE	TCGA-XF-AAMW-01A-11D-A42E-08	2.23653e-05	2.32972e-07	7.78431e-07	2.09256e-07	2.18894e-05
DO51939_TCGA-XF-AAMX-01A-11D-A42E-08	bladder	ICGC_WXS_BLCA_US_TCGA	FALSE	PROF					0.123003	FALSE	DO51939	0	TCGA-XF-AAMX	TRUE	TCGA-XF-AAMX-01A-11D-A42E-08	0.000264227	2.75237e-06	1.71765e-05	2.12523e-06	0.000263778
DO51941_TCGA-XF-AAN0-01A-11D-A42E-08	bladder	ICGC_WXS_BLCA_US_TCGA	FALSE	PROF					0.157943	FALSE	DO51941	0	TCGA-XF-AAN0	TRUE	TCGA-XF-AAN0-01A-11D-A42E-08	0.000314611	3.27719e-06	2.19881e-05	2.46367e-06	0.000315124
DO51942_TCGA-XF-AAN1-01A-31D-A42E-08	bladder	ICGC_WXS_BLCA_US_TCGA	FALSE	PROF					0.10295	FALSE	DO51942	0	TCGA-XF-AAN1	TRUE	TCGA-XF-AAN1-01A-31D-A42E-08	7.86603e-05	8.19378e-07	9.00518e-06	4.63474e-07	7.6913e-05
DO51943_TCGA-XF-AAN4-01A-11D-A42E-08	bladder	ICGC_WXS_BLCA_US_TCGA	FALSE	PROF					0.145434	FALSE	DO51943	0	TCGA-XF-AAN4	TRUE	TCGA-XF-AAN4-01A-11D-A42E-08	3.83483e-05	3.99462e-07	2.6205e-06	3.02895e-07	3.38337e-05
DO51945_TCGA-XF-AAN5-01A-11D-A42E-08	bladder	ICGC_WXS_BLCA_US_TCGA	FALSE	PROF					0.191444	FALSE	DO51945	0	TCGA-XF-AAN5	TRUE	TCGA-XF-AAN5-01A-11D-A42E-08	0.000230192	2.39783e-06	1.60972e-05	1.8022e-06	0.00023181
DO51946_TCGA-XF-AAN7-01A-11D-A42E-08	bladder	ICGC_WXS_BLCA_US_TCGA	FALSE						0.30178	FALSE	DO51946	0	TCGA-XF-AAN7	TRUE	TCGA-XF-AAN7-01A-11D-A42E-08	0.000126089	1.31343e-06	1.06405e-05	9.07905e-07	0.000121072
DO51947_TCGA-XF-AAN8-01A-11D-A42E-08	bladder	ICGC_WXS_BLCA_US_TCGA	FALSE	PROF					0.141819	FALSE	DO51947	0	TCGA-XF-AAN8	TRUE	TCGA-XF-AAN8-01A-11D-A42E-08	2.44724e-06	2.54921e-08	4.88048e-07	5.38096e-09	2.01821e-06
DO51948_TCGA-YC-A89H-01A-11D-A364-08	bladder	ICGC_WXS_BLCA_US_TCGA	FALSE	PROF					0.142032	FALSE	DO51948	0	TCGA-YC-A89H	TRUE	TCGA-YC-A89H-01A-11D-A364-08	0.00141005	1.4688e-05	0.000141573	9.1713e-06	0.0013921
DO51949_TCGA-YC-A9TC-01A-22D-A391-08	bladder	ICGC_WXS_BLCA_US_TCGA	FALSE	PROF					0.181601	FALSE	DO51949	0	TCGA-YC-A9TC	TRUE	TCGA-YC-A9TC-01A-22D-A391-08	8.58476e-05	8.94246e-07	7.00922e-06	6.28378e-07	9.00546e-05
DO51951_TCGA-YF-AA3L-01A-11D-A38G-08	bladder	ICGC_WXS_BLCA_US_TCGA	FALSE						0.289934	FALSE	DO51951	0	TCGA-YF-AA3L	TRUE	TCGA-YF-AA3L-01A-11D-A38G-08	0.000233021	2.4273e-06	1.37996e-05	1.93285e-06	0.000235071
DO51952_TCGA-YF-AA3M-01A-11D-A42E-08	bladder	ICGC_WXS_BLCA_US_TCGA	FALSE	PROF					0.102868	FALSE	DO51952	0	TCGA-YF-AA3M	TRUE	TCGA-YF-AA3M-01A-11D-A42E-08	0.000137993	1.43742e-06	1.1433e-05	1.00283e-06	0.000150606
DO520_TCGA-C4-A0F0-01A-12D-A10S-08	bladder	ICGC_WXS_BLCA_US_TCGA	FALSE	PROF					0.125862	FALSE	DO520	0	TCGA-C4-A0F0	TRUE	TCGA-C4-A0F0-01A-12D-A10S-08	6.85921e-05	7.14502e-07	5.44521e-06	5.08819e-07	7.44952e-05
DO522_TCGA-H4-A2HQ-01A-11D-A17V-08	bladder	ICGC_WXS_BLCA_US_TCGA	FALSE	PROF					0.109937	FALSE	DO522	0	TCGA-H4-A2HQ	TRUE	TCGA-H4-A2HQ-01A-11D-A17V-08	0.000358162	3.73085e-06	1.98153e-05	3.03153e-06	0.000356955
DO524_TCGA-GU-A42R-01A-11D-A23M-08	bladder	ICGC_WXS_BLCA_US_TCGA	FALSE	PROF					0.118525	FALSE	DO524	0	TCGA-GU-A42R	TRUE	TCGA-GU-A42R-01A-11D-A23M-08	0.000130718	1.36165e-06	8.4007e-06	1.05561e-06	0.000133366
DO526_TCGA-GV-A40E-01A-12D-A23M-08	bladder	ICGC_WXS_BLCA_US_TCGA	FALSE	PROF					0.119829	FALSE	DO526	0	TCGA-GV-A40E	TRUE	TCGA-GV-A40E-01A-12D-A23M-08	0.00012182	1.26896e-06	8.31947e-06	9.62419e-07	0.000115956
DO528_TCGA-E7-A3Y1-01A-11D-A22Z-08	bladder	ICGC_WXS_BLCA_US_TCGA	FALSE	PROF					0.118795	FALSE	DO528	0	TCGA-E7-A3Y1	TRUE	TCGA-E7-A3Y1-01A-11D-A22Z-08	0.000128635	1.33994e-06	9.98943e-06	9.63879e-07	0.000127932
DO530_TCGA-GC-A3RB-01A-12D-A21Z-08	bladder	ICGC_WXS_BLCA_US_TCGA	FALSE	PROF					0.131943	FALSE	DO530	0	TCGA-GC-A3RB	TRUE	TCGA-GC-A3RB-01A-12D-A21Z-08	0.000149236	1.55455e-06	1.35866e-05	1.03141e-06	0.000146603
DO532_TCGA-BL-A3JM-01A-12D-A21A-08	bladder	ICGC_WXS_BLCA_US_TCGA	FALSE						0.313856	FALSE	DO532	0	TCGA-BL-A3JM	TRUE	TCGA-BL-A3JM-01A-12D-A21A-08	0.000165257	1.72142e-06	1.37895e-05	1.19673e-06	0.000166684
DO534_TCGA-GU-A42P-01A-11D-A23U-08	bladder	ICGC_WXS_BLCA_US_TCGA	FALSE	PROF					0.182355	FALSE	DO534	0	TCGA-GU-A42P	TRUE	TCGA-GU-A42P-01A-11D-A23U-08	0.00023761	2.4751e-06	2.00292e-05	1.71188e-06	0.000231103
DO536_TCGA-BL-A13J-01A-11D-A271-08	bladder	ICGC_WXS_BLCA_US_TCGA	FALSE	PROF					0.13204	FALSE	DO536	0	TCGA-BL-A13J	TRUE	TCGA-BL-A13J-01A-11D-A271-08	8.67494e-05	9.0364e-07	7.03019e-06	6.37268e-07	9.80431e-05
DO538_TCGA-BT-A20U-01A-11D-A14W-08	bladder	ICGC_WXS_BLCA_US_TCGA	FALSE	PROF					0.148842	FALSE	DO538	0	TCGA-BT-A20U	TRUE	TCGA-BT-A20U-01A-11D-A14W-08	7.69508e-05	8.01571e-07	6.9187e-06	5.35609e-07	7.53097e-05
DO540_TCGA-HQ-A2OE-01A-11D-A202-08	bladder	ICGC_WXS_BLCA_US_TCGA	FALSE	PROF					0.159698	FALSE	DO540	0	TCGA-HQ-A2OE	TRUE	TCGA-HQ-A2OE-01A-11D-A202-08	0.000116987	1.21861e-06	9.01036e-06	8.79841e-07	0.000115108
DO542_TCGA-K4-A4AC-01A-21D-A26M-08	bladder	ICGC_WXS_BLCA_US_TCGA	FALSE	PROF					0.138402	FALSE	DO542	0	TCGA-K4-A4AC	TRUE	TCGA-K4-A4AC-01A-21D-A26M-08	0.000133484	1.39046e-06	1.35938e-05	8.59882e-07	0.000126656
DO544_TCGA-DK-A3WY-01A-11D-A22Z-08	bladder	ICGC_WXS_BLCA_US_TCGA	FALSE	PROF					0.162978	FALSE	DO544	0	TCGA-DK-A3WY	TRUE	TCGA-DK-A3WY-01A-11D-A22Z-08	1.44764e-05	1.50796e-07	1.31025e-06	1.00385e-07	1.32647e-05
DO546_TCGA-G2-A2EK-01A-22D-A18F-08	bladder	ICGC_WXS_BLCA_US_TCGA	FALSE	PROF					0.165779	FALSE	DO546	0	TCGA-G2-A2EK	TRUE	TCGA-G2-A2EK-01A-22D-A18F-08	5.15406e-05	5.36881e-07	5.93487e-06	3.02186e-07	5.64997e-05
DO548_TCGA-DK-A1AA-01A-11D-A13W-08	bladder	ICGC_WXS_BLCA_US_TCGA	FALSE	PROF					0.12348	FALSE	DO548	0	TCGA-DK-A1AA	TRUE	TCGA-DK-A1AA-01A-11D-A13W-08	7.08088e-05	7.37591e-07	5.12534e-06	5.46819e-07	6.55347e-05
DO550_TCGA-BT-A20N-01A-11D-A14W-08	bladder	ICGC_WXS_BLCA_US_TCGA	FALSE	PROF					0.14871	FALSE	DO550	0	TCGA-BT-A20N	TRUE	TCGA-BT-A20N-01A-11D-A14W-08	0.000189287	1.97173e-06	7.47766e-06	1.73235e-06	0.000202385
DO552_TCGA-BL-A0C8-01A-11D-A271-08	bladder	ICGC_WXS_BLCA_US_TCGA	FALSE	PROF					0.164492	FALSE	DO552	0	TCGA-BL-A0C8	TRUE	TCGA-BL-A0C8-01A-11D-A271-08	0.000115546	1.20361e-06	1.44699e-05	6.26814e-07	0.00010889
DO554_TCGA-G2-A2EJ-01A-11D-A17V-08	bladder	ICGC_WXS_BLCA_US_TCGA	FALSE	PROF					0.137518	FALSE	DO554	0	TCGA-G2-A2EJ	TRUE	TCGA-G2-A2EJ-01A-11D-A17V-08	0.000461214	4.80431e-06	1.87442e-05	4.19823e-06	0.000457693
DO555_TCGA-DK-A3IL-01A-11D-A20D-08	bladder	ICGC_WXS_BLCA_US_TCGA	FALSE	PROF					0.117652	FALSE	DO555	0	TCGA-DK-A3IL	TRUE	TCGA-DK-A3IL-01A-11D-A20D-08	0.000144357	1.50371e-06	1.15086e-05	1.06872e-06	0.000140527
DO558_TCGA-DK-A1A3-01A-11D-A13W-08	bladder	ICGC_WXS_BLCA_US_TCGA	FALSE	PROF					0.212142	FALSE	DO558	0	TCGA-DK-A1A3	TRUE	TCGA-DK-A1A3-01A-11D-A13W-08	0.000509416	5.30642e-06	3.71196e-05	3.92323e-06	0.000490771
DO561_TCGA-BT-A2LA-01A-11D-A18F-08	bladder	ICGC_WXS_BLCA_US_TCGA	FALSE	PROF					0.129919	FALSE	DO561	0	TCGA-BT-A2LA	TRUE	TCGA-BT-A2LA-01A-11D-A18F-08	0.000206349	2.14946e-06	3.11011e-05	8.907e-07	0.000195874
DO563_TCGA-GV-A3QK-01B-11D-A23M-08	bladder	ICGC_WXS_BLCA_US_TCGA	FALSE	PROF					0.172402	FALSE	DO563	0	TCGA-GV-A3QK	TRUE	TCGA-GV-A3QK-01B-11D-A23M-08	0.000133153	1.38701e-06	1.39259e-05	8.41838e-07	0.000128697
DO566_TCGA-DK-A3IS-01A-21D-A21A-08	bladder	ICGC_WXS_BLCA_US_TCGA	FALSE	PROF					0.115386	FALSE	DO566	0	TCGA-DK-A3IS	TRUE	TCGA-DK-A3IS-01A-21D-A21A-08	0.000296041	3.08376e-06	2.61433e-05	2.08117e-06	0.000281683
DO569_TCGA-FD-A3SO-01A-11D-A22Z-08	bladder	ICGC_WXS_BLCA_US_TCGA	FALSE	PROF					0.14135	FALSE	DO569	0	TCGA-FD-A3SO	TRUE	TCGA-FD-A3SO-01A-11D-A22Z-08	0.000289346	3.01402e-06	2.6707e-05	1.98389e-06	0.000286401
DO572_TCGA-FD-A3B7-01A-31D-A20D-08	bladder	ICGC_WXS_BLCA_US_TCGA	FALSE	PROF					0.142121	FALSE	DO572	0	TCGA-FD-A3B7	TRUE	TCGA-FD-A3B7-01A-31D-A20D-08	6.0371e-05	6.28864e-07	4.08268e-06	4.78698e-07	6.11399e-05
DO575_TCGA-FD-A3N6-01A-11D-A21A-08	bladder	ICGC_WXS_BLCA_US_TCGA	FALSE	PROF					0.118181	FALSE	DO575	0	TCGA-FD-A3N6	TRUE	TCGA-FD-A3N6-01A-11D-A21A-08	0.000124527	1.29716e-06	1.76747e-05	5.85089e-07	0.000123724
DO578_TCGA-BT-A2LD-01A-12D-A20D-08	bladder	ICGC_WXS_BLCA_US_TCGA	FALSE	PROF					0.154985	FALSE	DO578	0	TCGA-BT-A2LD	TRUE	TCGA-BT-A2LD-01A-12D-A20D-08	9.67859e-05	1.00819e-06	1.29898e-05	4.87246e-07	9.48521e-05
DO581_TCGA-C4-A0F1-01A-11D-A10S-08	bladder	ICGC_WXS_BLCA_US_TCGA	FALSE	PROF					0.132193	FALSE	DO581	0	TCGA-C4-A0F1	TRUE	TCGA-C4-A0F1-01A-11D-A10S-08	0.000162187	1.68945e-06	1.91117e-05	9.31959e-07	0.000161386
DO584_TCGA-GV-A40G-01A-11D-A23M-08	bladder	ICGC_WXS_BLCA_US_TCGA	FALSE						0.290061	FALSE	DO584	0	TCGA-GV-A40G	TRUE	TCGA-GV-A40G-01A-11D-A23M-08	0.000144578	1.50602e-06	1.69549e-05	8.34328e-07	0.000146452
DO587_TCGA-CU-A3QU-01A-11D-A22Z-08	bladder	ICGC_WXS_BLCA_US_TCGA	FALSE	PROF					0.185474	FALSE	DO587	0	TCGA-CU-A3QU	TRUE	TCGA-CU-A3QU-01A-11D-A22Z-08	9.56014e-05	9.95848e-07	9.45362e-06	6.28119e-07	9.41975e-05
DO590_TCGA-G2-A3VY-01A-11D-A22Z-08	bladder	ICGC_WXS_BLCA_US_TCGA	FALSE	PROF					0.127114	FALSE	DO590	0	TCGA-G2-A3VY	TRUE	TCGA-G2-A3VY-01A-11D-A22Z-08	0.000526229	5.48155e-06	2.01334e-05	4.84451e-06	0.000522407
DO594_TCGA-FD-A3SP-01A-31D-A22Z-08	bladder	ICGC_WXS_BLCA_US_TCGA	FALSE	PROF					0.155748	FALSE	DO594	0	TCGA-FD-A3SP	TRUE	TCGA-FD-A3SP-01A-31D-A22Z-08	0.000111092	1.1572e-06	1.21679e-05	6.78481e-07	0.000108474
DO598_TCGA-GD-A3OS-01A-12D-A21Z-08	bladder	ICGC_WXS_BLCA_US_TCGA	FALSE	PROF					0.145372	FALSE	DO598	0	TCGA-GD-A3OS	TRUE	TCGA-GD-A3OS-01A-12D-A21Z-08	7.83642e-05	8.16293e-07	9.374e-06	4.44219e-07	7.8503e-05
DO602_TCGA-FD-A3NA-01A-11D-A21A-08	bladder	ICGC_WXS_BLCA_US_TCGA	FALSE	PROF					0.168172	FALSE	DO602	0	TCGA-FD-A3NA	TRUE	TCGA-FD-A3NA-01A-11D-A21A-08	0.000136404	1.42088e-06	9.75829e-06	1.05838e-06	0.000135126
DO607_TCGA-FD-A3B8-01A-31D-A20D-08	bladder	ICGC_WXS_BLCA_US_TCGA	FALSE	PROF					0.149965	FALSE	DO607	0	TCGA-FD-A3B8	TRUE	TCGA-FD-A3B8-01A-31D-A20D-08	3.19065e-05	3.3236e-07	2.66588e-06	2.30902e-07	2.91807e-05
DO612_TCGA-DK-A3IU-01A-11D-A20D-08	bladder	ICGC_WXS_BLCA_US_TCGA	FALSE	PROF					0.150448	FALSE	DO612	0	TCGA-DK-A3IU	TRUE	TCGA-DK-A3IU-01A-11D-A20D-08	0.000330674	3.44452e-06	2.3362e-05	2.57854e-06	0.000322891
DO617_TCGA-DK-A3X2-01A-11D-A22Z-08	bladder	ICGC_WXS_BLCA_US_TCGA	FALSE	PROF					0.161047	FALSE	DO617	0	TCGA-DK-A3X2	TRUE	TCGA-DK-A3X2-01A-11D-A22Z-08	0.00010336	1.07667e-06	1.20399e-05	6.00005e-07	0.000106234
DO622_TCGA-BT-A20R-01A-12D-A16O-08	bladder	ICGC_WXS_BLCA_US_TCGA	FALSE	PROF					0.14705	FALSE	DO622	0	TCGA-BT-A20R	TRUE	TCGA-BT-A20R-01A-12D-A16O-08	0.000242743	2.52857e-06	2.40174e-05	1.59427e-06	0.000246219
DO627_TCGA-GV-A3QG-01A-11D-A21Z-08	bladder	ICGC_WXS_BLCA_US_TCGA	FALSE	PROF					0.202249	FALSE	DO627	0	TCGA-GV-A3QG	TRUE	TCGA-GV-A3QG-01A-11D-A21Z-08	7.61047e-05	7.92758e-07	6.17987e-06	5.58535e-07	7.77778e-05
DO633_TCGA-DK-A1AF-01A-11D-A13W-08	bladder	ICGC_WXS_BLCA_US_TCGA	FALSE	PROF					0.150133	FALSE	DO633	0	TCGA-DK-A1AF	TRUE	TCGA-DK-A1AF-01A-11D-A13W-08	7.7153e-05	8.03677e-07	4.90905e-06	6.25182e-07	7.37375e-05
DO639_TCGA-FD-A3N5-01A-11D-A21A-08	bladder	ICGC_WXS_BLCA_US_TCGA	FALSE	PROF					0.147266	FALSE	DO639	0	TCGA-FD-A3N5	TRUE	TCGA-FD-A3N5-01A-11D-A21A-08	0.000269158	2.80373e-06	1.29793e-05	2.36131e-06	0.000250689
DO645_TCGA-FD-A43U-01A-11D-A23U-08	bladder	ICGC_WXS_BLCA_US_TCGA	FALSE	PROF					0.128856	FALSE	DO645	0	TCGA-FD-A43U	TRUE	TCGA-FD-A43U-01A-11D-A23U-08	7.689e-05	8.00938e-07	1.03974e-05	3.83699e-07	6.86474e-05
DO651_TCGA-G2-A2EC-01A-11D-A17V-08	bladder	ICGC_WXS_BLCA_US_TCGA	FALSE	PROF					0.139227	FALSE	DO651	0	TCGA-G2-A2EC	TRUE	TCGA-G2-A2EC-01A-11D-A17V-08	0.000145846	1.51923e-06	1.0281e-05	1.13828e-06	0.000141252
DO657_TCGA-BT-A20W-01A-21D-A14W-08	bladder	ICGC_WXS_BLCA_US_TCGA	FALSE	PROF					0.16788	FALSE	DO657	0	TCGA-BT-A20W	TRUE	TCGA-BT-A20W-01A-21D-A14W-08	7.17979e-05	7.47894e-07	7.00564e-06	4.75818e-07	6.98433e-05
DO663_TCGA-CU-A3KJ-01A-11D-A21A-08	bladder	ICGC_WXS_BLCA_US_TCGA	FALSE	PROF					0.120217	FALSE	DO663	0	TCGA-CU-A3KJ	TRUE	TCGA-CU-A3KJ-01A-11D-A21A-08	0.000184788	1.92487e-06	1.33458e-05	1.42831e-06	0.000177885
DO669_TCGA-C4-A0F7-01A-11D-A10S-08	bladder	ICGC_WXS_BLCA_US_TCGA	FALSE	PROF					0.114155	FALSE	DO669	0	TCGA-C4-A0F7	TRUE	TCGA-C4-A0F7-01A-11D-A10S-08	8.48674e-05	8.84035e-07	1.24841e-05	3.79683e-07	7.80116e-05
DO675_TCGA-BT-A20P-01A-11D-A14W-08	bladder	ICGC_WXS_BLCA_US_TCGA	FALSE	PROF					0.147709	FALSE	DO675	0	TCGA-BT-A20P	TRUE	TCGA-BT-A20P-01A-11D-A14W-08	8.49363e-05	8.84753e-07	9.46374e-06	5.11754e-07	7.88357e-05
DO681_TCGA-FD-A3SJ-01A-12D-A22Z-08	bladder	ICGC_WXS_BLCA_US_TCGA	FALSE	PROF					0.158022	FALSE	DO681	0	TCGA-FD-A3SJ	TRUE	TCGA-FD-A3SJ-01A-12D-A22Z-08	0.000186176	1.93933e-06	1.03814e-05	1.57229e-06	0.000181179
DO683_TCGA-K4-A3WV-01A-11D-A22Z-08	bladder	ICGC_WXS_BLCA_US_TCGA	FALSE	PROF					0.14216	FALSE	DO683	0	TCGA-K4-A3WV	TRUE	TCGA-K4-A3WV-01A-11D-A22Z-08	6.95087e-05	7.24049e-07	9.45957e-06	3.44243e-07	6.72006e-05
DO689_TCGA-BT-A20V-01A-11D-A14W-08	bladder	ICGC_WXS_BLCA_US_TCGA	FALSE	PROF					0.161001	FALSE	DO689	0	TCGA-BT-A20V	TRUE	TCGA-BT-A20V-01A-11D-A14W-08	0.000104273	1.08618e-06	1.39753e-05	5.25783e-07	0.000103239
DO695_TCGA-BT-A20Q-01A-11D-A14W-08	bladder	ICGC_WXS_BLCA_US_TCGA	FALSE	PROF					0.155181	FALSE	DO695	0	TCGA-BT-A20Q	TRUE	TCGA-BT-A20Q-01A-11D-A14W-08	8.59245e-05	8.95047e-07	1.01134e-05	4.94249e-07	8.47916e-05
DO696_TCGA-DK-A3WX-01A-22D-A22Z-08	bladder	ICGC_WXS_BLCA_US_TCGA	FALSE	PROF					0.147929	FALSE	DO696	0	TCGA-DK-A3WX	TRUE	TCGA-DK-A3WX-01A-22D-A22Z-08	3.90042e-05	4.06293e-07	5.16001e-06	1.9961e-07	3.59506e-05
DO702_TCGA-E5-A2PC-01A-11D-A202-08	bladder	ICGC_WXS_BLCA_US_TCGA	FALSE	PROF					0.118294	FALSE	DO702	0	TCGA-E5-A2PC	TRUE	TCGA-E5-A2PC-01A-11D-A202-08	0.000195637	2.03788e-06	1.12254e-05	1.63843e-06	0.000184766
DO708_TCGA-DK-A2I2-01A-11D-A17V-08	bladder	ICGC_WXS_BLCA_US_TCGA	FALSE	PROF					0.159744	FALSE	DO708	0	TCGA-DK-A2I2	TRUE	TCGA-DK-A2I2-01A-11D-A17V-08	0.000359773	3.74763e-06	6.30071e-06	3.63663e-06	0.000344014
DO714_TCGA-FD-A3B5-01A-11D-A20D-08	bladder	ICGC_WXS_BLCA_US_TCGA	FALSE	PROF					0.117561	FALSE	DO714	0	TCGA-FD-A3B5	TRUE	TCGA-FD-A3B5-01A-11D-A20D-08	0.000121302	1.26356e-06	1.13829e-05	8.23594e-07	0.00012231
DO720_TCGA-FT-A3EE-01A-11D-A202-08	bladder	ICGC_WXS_BLCA_US_TCGA	FALSE	PROF					0.153294	FALSE	DO720	0	TCGA-FT-A3EE	TRUE	TCGA-FT-A3EE-01A-11D-A202-08	0.0001017	1.05938e-06	1.02301e-05	6.60649e-07	9.83881e-05
DO726_TCGA-G2-A2EF-01A-12D-A18F-08	bladder	ICGC_WXS_BLCA_US_TCGA	FALSE	PROF					0.139478	FALSE	DO726	0	TCGA-G2-A2EF	TRUE	TCGA-G2-A2EF-01A-12D-A18F-08	0.000200274	2.08619e-06	1.38093e-05	1.57649e-06	0.000205018
DO732_TCGA-FD-A3SL-01A-21D-A22Z-08	bladder	ICGC_WXS_BLCA_US_TCGA	FALSE	PROF					0.162235	FALSE	DO732	0	TCGA-FD-A3SL	TRUE	TCGA-FD-A3SL-01A-21D-A22Z-08	0.000204565	2.13088e-06	1.3013e-05	1.65775e-06	0.000191318
DO737_TCGA-FD-A3SS-01A-12D-A22Z-08	bladder	ICGC_WXS_BLCA_US_TCGA	FALSE	PROF					0.144289	FALSE	DO737	0	TCGA-FD-A3SS	TRUE	TCGA-FD-A3SS-01A-12D-A22Z-08	0.00039503	4.11489e-06	3.42651e-05	2.80401e-06	0.000393923
DO743_TCGA-GV-A3JV-01A-11D-A21Z-08	bladder	ICGC_WXS_BLCA_US_TCGA	FALSE						0.286284	FALSE	DO743	0	TCGA-GV-A3JV	TRUE	TCGA-GV-A3JV-01A-11D-A21Z-08	0.000130645	1.36089e-06	2.20457e-05	4.6155e-07	0.00012837
DO749_TCGA-FD-A3B3-01A-12D-A202-08	bladder	ICGC_WXS_BLCA_US_TCGA	FALSE	PROF					0.137985	FALSE	DO749	0	TCGA-FD-A3B3	TRUE	TCGA-FD-A3B3-01A-12D-A202-08	0.000149388	1.55612e-06	1.28995e-05	1.06293e-06	0.000146322
DO755_TCGA-GC-A3WC-01A-31D-A22Z-08	bladder	ICGC_WXS_BLCA_US_TCGA	FALSE	PROF					0.1426	FALSE	DO755	0	TCGA-GC-A3WC	TRUE	TCGA-GC-A3WC-01A-31D-A22Z-08	0.000134151	1.39741e-06	9.25893e-06	1.0556e-06	0.000134618
DO761_TCGA-GD-A3OP-01A-21D-A21Z-08	bladder	ICGC_WXS_BLCA_US_TCGA	FALSE	PROF					0.133049	FALSE	DO761	0	TCGA-GD-A3OP	TRUE	TCGA-GD-A3OP-01A-21D-A21Z-08	0.00027513	2.86593e-06	1.82016e-05	2.19917e-06	0.000272157
DO767_TCGA-G2-A3IE-01A-11D-A20D-08	bladder	ICGC_WXS_BLCA_US_TCGA	FALSE	PROF					0.139461	FALSE	DO767	0	TCGA-G2-A3IE	TRUE	TCGA-G2-A3IE-01A-11D-A20D-08	0.000276261	2.87772e-06	1.54331e-05	2.33183e-06	0.000279385
DO773_TCGA-GV-A3JZ-01A-11D-A21A-08	bladder	ICGC_WXS_BLCA_US_TCGA	FALSE	PROF					0.119317	FALSE	DO773	0	TCGA-GV-A3JZ	TRUE	TCGA-GV-A3JZ-01A-11D-A21A-08	0.000371871	3.87366e-06	3.42768e-05	2.55179e-06	0.000374498
DO779_TCGA-DK-A3IT-01A-31D-A20D-08	bladder	ICGC_WXS_BLCA_US_TCGA	FALSE	PROF					0.155606	FALSE	DO779	0	TCGA-DK-A3IT	TRUE	TCGA-DK-A3IT-01A-31D-A20D-08	0.000340395	3.54578e-06	1.82253e-05	2.90754e-06	0.000327417
DO785_TCGA-G2-A2ES-01A-11D-A17V-08	bladder	ICGC_WXS_BLCA_US_TCGA	FALSE	PROF					0.140414	FALSE	DO785	0	TCGA-G2-A2ES	TRUE	TCGA-G2-A2ES-01A-11D-A17V-08	0.000368016	3.8335e-06	2.3501e-05	2.97839e-06	0.000371427
DO791_TCGA-CF-A3MH-01A-11D-A20D-08	bladder	ICGC_WXS_BLCA_US_TCGA	FALSE	PROF					0.112634	FALSE	DO791	0	TCGA-CF-A3MH	TRUE	TCGA-CF-A3MH-01A-11D-A20D-08	4.4913e-05	4.67844e-07	6.60514e-06	2.01005e-07	4.40662e-05
DO797_TCGA-DK-A3IM-01A-11D-A20D-08	bladder	ICGC_WXS_BLCA_US_TCGA	FALSE	PROF					0.12515	FALSE	DO797	0	TCGA-DK-A3IM	TRUE	TCGA-DK-A3IM-01A-11D-A20D-08	6.94957e-05	7.23914e-07	5.85941e-06	5.00632e-07	7.24729e-05
DO798_TCGA-DK-A2I6-01A-12D-A18F-08	bladder	ICGC_WXS_BLCA_US_TCGA	FALSE	PROF					0.113916	FALSE	DO798	0	TCGA-DK-A2I6	TRUE	TCGA-DK-A2I6-01A-12D-A18F-08	0.000229283	2.38837e-06	1.50348e-05	1.83853e-06	0.000232704
DO804_TCGA-BT-A20T-01A-11D-A14W-08	bladder	ICGC_WXS_BLCA_US_TCGA	FALSE	PROF					0.132157	FALSE	DO804	0	TCGA-BT-A20T	TRUE	TCGA-BT-A20T-01A-11D-A14W-08	0.000223671	2.3299e-06	1.62905e-05	1.72292e-06	0.000215628
DO810_TCGA-FD-A3SR-01A-11D-A22Z-08	bladder	ICGC_WXS_BLCA_US_TCGA	FALSE	PROF					0.192923	FALSE	DO810	0	TCGA-FD-A3SR	TRUE	TCGA-FD-A3SR-01A-11D-A22Z-08	0.000116262	1.21106e-06	1.19601e-05	7.43716e-07	0.00011357
DO816_TCGA-GC-A3RC-01A-11D-A22Z-08	bladder	ICGC_WXS_BLCA_US_TCGA	FALSE	PROF					0.191669	FALSE	DO816	0	TCGA-GC-A3RC	TRUE	TCGA-GC-A3RC-01A-11D-A22Z-08	0.000287282	2.99252e-06	1.91783e-05	2.28879e-06	0.000282353
DO822_TCGA-DK-A1AG-01A-11D-A13W-08	bladder	ICGC_WXS_BLCA_US_TCGA	FALSE	PROF					0.152415	FALSE	DO822	0	TCGA-DK-A1AG	TRUE	TCGA-DK-A1AG-01A-11D-A13W-08	9.82793e-05	1.02374e-06	1.08968e-05	5.9448e-07	0.000100723
DO828_TCGA-CF-A27C-01A-11D-A16O-08	bladder	ICGC_WXS_BLCA_US_TCGA	FALSE	PROF					0.117305	FALSE	DO828	0	TCGA-CF-A27C	TRUE	TCGA-CF-A27C-01A-11D-A16O-08	0.000115832	1.20658e-06	9.27161e-06	8.55931e-07	0.000117705
DO834_TCGA-CU-A3YL-01A-11D-A22Z-08	bladder	ICGC_WXS_BLCA_US_TCGA	FALSE	PROF					0.139206	FALSE	DO834	0	TCGA-CU-A3YL	TRUE	TCGA-CU-A3YL-01A-11D-A22Z-08	0.000184385	1.92068e-06	1.57428e-05	1.31971e-06	0.000178091
DO838_TCGA-FD-A3SM-01A-11D-A22Z-08	bladder	ICGC_WXS_BLCA_US_TCGA	FALSE	PROF					0.116422	FALSE	DO838	0	TCGA-FD-A3SM	TRUE	TCGA-FD-A3SM-01A-11D-A22Z-08	0.000166819	1.7377e-06	1.43656e-05	1.18866e-06	0.000158763
DO844_TCGA-GC-A3I6-01A-11D-A20D-08	bladder	ICGC_WXS_BLCA_US_TCGA	FALSE	PROF					0.14398	FALSE	DO844	0	TCGA-GC-A3I6	TRUE	TCGA-GC-A3I6-01A-11D-A20D-08	0.000140396	1.46245e-06	1.01517e-05	1.08466e-06	0.000143544
DO850_TCGA-GC-A3YS-01A-11D-A23M-08	bladder	ICGC_WXS_BLCA_US_TCGA	FALSE	PROF					0.121012	FALSE	DO850	0	TCGA-GC-A3YS	TRUE	TCGA-GC-A3YS-01A-11D-A23M-08	0.000210726	2.19506e-06	2.14159e-05	1.35937e-06	0.000208654
DO856_TCGA-BT-A3PH-01A-11D-A21Z-08	bladder	ICGC_WXS_BLCA_US_TCGA	FALSE	PROF					0.237593	FALSE	DO856	0	TCGA-BT-A3PH	TRUE	TCGA-BT-A3PH-01A-11D-A21Z-08	0.000335306	3.49277e-06	2.14016e-05	2.71412e-06	0.000329884
DO862_TCGA-FD-A3B4-01A-12D-A202-08	bladder	ICGC_WXS_BLCA_US_TCGA	FALSE	PROF					0.128875	FALSE	DO862	0	TCGA-FD-A3B4	TRUE	TCGA-FD-A3B4-01A-12D-A202-08	6.38271e-05	6.64865e-07	5.70254e-06	4.45836e-07	6.26504e-05
DO49228_TARGET-10-PANTSM-03A-01D	blood_lymphoid	ICGC_WXS_ALL_US_TARGET	FALSE	PROF						FALSE	DO49228	0	TARGET-10-PANTSM-03A-01D	FALSE		8.78314e-06	9.14911e-08	1.92407e-06	1.18135e-08	7.09392e-06
DO49249_TARGET-10-PAPAGK-03A-01D	blood_lymphoid	ICGC_WXS_ALL_US_TARGET	FALSE	PROF						FALSE	DO49249	0	TARGET-10-PAPAGK-03A-01D	FALSE		4.43195e-06	4.61662e-08	3.30583e-07	3.38002e-08	4.59223e-06
DO49265_TARGET-10-PAPEFH-03A-01D	blood_lymphoid	ICGC_WXS_ALL_US_TARGET	FALSE	PROF						FALSE	DO49265	0	TARGET-10-PAPEFH-03A-01D	FALSE		1.08911e-05	1.13449e-07	1.8803e-06	3.6629e-08	1.40628e-05
DO49287_TARGET-10-PAPJIB-03A-01D	blood_lymphoid	ICGC_WXS_ALL_US_TARGET	FALSE	PROF						FALSE	DO49287	0	TARGET-10-PAPJIB-03A-01D	FALSE		1.11362e-05	1.16002e-07	2.37192e-06	1.7919e-08	1.06728e-05
DO49292_TARGET-10-PAPLDL-03A-01D	blood_lymphoid	ICGC_WXS_ALL_US_TARGET	FALSE	PROF						FALSE	DO49292	0	TARGET-10-PAPLDL-03A-01D	FALSE		1.87804e-05	1.95629e-07	3.59106e-06	4.80021e-08	1.57797e-05
DO49301_TARGET-10-PAPNNX-03A-01D	blood_lymphoid	ICGC_WXS_ALL_US_TARGET	FALSE	PROF						FALSE	DO49301	0	TARGET-10-PAPNNX-03A-01D	FALSE		7.34268e-06	7.64863e-08	9.76095e-07	3.73728e-08	7.56796e-06
DO49309_TARGET-10-PAPSPG-03A-01D	blood_lymphoid	ICGC_WXS_ALL_US_TARGET	FALSE	PROF						FALSE	DO49309	0	TARGET-10-PAPSPG-03A-01D	FALSE		7.50427e-06	7.81695e-08	1.72641e-06	6.50688e-09	7.96077e-06
DO49310_TARGET-10-PAPSPN-03A-01D	blood_lymphoid	ICGC_WXS_ALL_US_TARGET	FALSE	PROF						FALSE	DO49310	0	TARGET-10-PAPSPN-03A-01D	FALSE		9.00931e-06	9.3847e-08	2.12888e-06	5.36723e-09	8.33469e-06
DO49320_TARGET-10-PAPZNK-03A-01D	blood_lymphoid	ICGC_WXS_ALL_US_TARGET	FALSE	PROF						FALSE	DO49320	0	TARGET-10-PAPZNK-03A-01D	FALSE		7.39826e-06	7.70652e-08	1.31025e-06	2.34485e-08	5.99714e-06
DO49323_TARGET-10-PARAKF-03A-01D	blood_lymphoid	ICGC_WXS_ALL_US_TARGET	FALSE	PROF						FALSE	DO49323	0	TARGET-10-PARAKF-03A-01D	FALSE		1.53535e-05	1.59932e-07	2.83185e-06	4.37618e-08	1.53773e-05
DO49326_TARGET-10-PARBRK-03A-01D	blood_lymphoid	ICGC_WXS_ALL_US_TARGET	FALSE	PROF						FALSE	DO49326	0	TARGET-10-PARBRK-03A-01D	FALSE		1.35225e-05	1.40859e-07	2.50484e-06	3.80774e-08	1.25517e-05
DO49334_TARGET-10-PARFTR-03A-01D	blood_lymphoid	ICGC_WXS_ALL_US_TARGET	FALSE	PROF						FALSE	DO49334	0	TARGET-10-PARFTR-03A-01D	FALSE		2.44598e-06	2.54789e-08	4.88048e-07	5.36723e-09	3.51011e-06
DO49337_TARGET-10-PARGHW-03A-01D	blood_lymphoid	ICGC_WXS_ALL_US_TARGET	FALSE	PROF						FALSE	DO49337	0	TARGET-10-PARGHW-03A-01D	FALSE		1.18402e-05	1.23335e-07	1.59349e-06	5.94152e-08	1.10413e-05
DO49341_TARGET-10-PARIAD-03A-01D	blood_lymphoid	ICGC_WXS_ALL_US_TARGET	FALSE	PROF						FALSE	DO49341	0	TARGET-10-PARIAD-03A-01D	FALSE		9.78952e-06	1.01974e-07	2.44738e-06	0	9.56564e-06
DO49355_TARGET-10-PARPNM-03A-01D	blood_lymphoid	ICGC_WXS_ALL_US_TARGET	FALSE	PROF						FALSE	DO49355	0	TARGET-10-PARPNM-03A-01D	FALSE		3.56529e-06	3.71384e-08	2.86812e-07	2.62831e-08	4.40474e-06
DO49357_TARGET-10-PARPRW-03A-01D	blood_lymphoid	ICGC_WXS_ALL_US_TARGET	FALSE	PROF						FALSE	DO49357	0	TARGET-10-PARPRW-03A-01D	FALSE		7.7879e-06	8.11239e-08	2.86812e-07	7.2181e-08	6.7153e-06
DO49380_TARGET-10-PASFXA-03A-01D	blood_lymphoid	ICGC_WXS_ALL_US_TARGET	FALSE	PROF						FALSE	DO49380	0	TARGET-10-PASFXA-03A-01D	FALSE		6.71678e-06	6.99665e-08	9.04208e-07	3.36951e-08	6.04404e-06
DO49382_TARGET-10-PASKAY-03A-01D	blood_lymphoid	ICGC_WXS_ALL_US_TARGET	FALSE	PROF						FALSE	DO49382	0	TARGET-10-PASKAY-03A-01D	FALSE		3.90438e-06	4.06706e-08	9.76095e-07	0	3.62174e-06
DO74_TARGET-10-PAKSWW-03A-01D	blood_lymphoid	ICGC_WXS_ALL_US_TARGET	FALSE	PROF						FALSE	DO74	0	TARGET-10-PAKSWW-03A-01D	FALSE		1.43798e-05	1.49789e-07	2.41569e-06	5.12719e-08	1.38378e-05
DO221144_TARGET-20-PAEEYP-09A-01D	blood_myeloid	ICGC_WXS_AML_US_TARGET	FALSE	PROF						FALSE	DO221144	0	TARGET-20-PAEEYP-09A-01D	FALSE		1.6097e-06	1.67677e-08	2.86812e-07	5.02662e-09	1.31562e-06
DO221148_TARGET-20-PAERAH-09A-01D	blood_myeloid	ICGC_WXS_AML_US_TARGET	FALSE	PROF						FALSE	DO221148	0	TARGET-20-PAERAH-09A-01D	FALSE		9.57836e-06	9.97745e-08	1.31025e-06	4.71452e-08	1.0118e-05
DO221154_TARGET-20-PAKKBK-09A-01D	blood_myeloid	ICGC_WXS_AML_US_TARGET	FALSE	PROF						FALSE	DO221154	0	TARGET-20-PAKKBK-09A-01D	FALSE		3.19606e-06	3.32923e-08	4.91619e-07	1.33651e-08	3.66899e-06
DO221157_TARGET-20-PAKRZG-04A-01D	blood_myeloid	ICGC_WXS_AML_US_TARGET	FALSE	PROF						FALSE	DO221157	0	TARGET-20-PAKRZG-04A-01D	FALSE		1.14725e-06	1.19505e-08	2.86812e-07	0	9.15285e-07
DO221157_TARGET-20-PAKRZG-09A-01D	blood_myeloid	ICGC_WXS_AML_US_TARGET	FALSE	PROF						FALSE	DO221157	0	TARGET-20-PAKRZG-09A-01D	FALSE		6.77061e-06	7.05271e-08	1.26291e-06	1.86845e-08	7.06137e-06
DO221166_TARGET-20-PAMYAS-09A-01D	blood_myeloid	ICGC_WXS_AML_US_TARGET	FALSE	PROF						FALSE	DO221166	0	TARGET-20-PAMYAS-09A-01D	FALSE		7.10264e-06	7.39859e-08	1.14921e-06	2.72368e-08	5.7801e-06
DO221181_TARGET-20-PANGTF-09A-01D	blood_myeloid	ICGC_WXS_AML_US_TARGET	FALSE	PROF						FALSE	DO221181	0	TARGET-20-PANGTF-09A-01D	FALSE		5.20113e-06	5.41785e-08	3.30583e-07	4.21609e-08	4.26907e-06
DO221192_TARGET-20-PANLIZ-09A-01D	blood_myeloid	ICGC_WXS_AML_US_TARGET	FALSE	PROF						FALSE	DO221192	0	TARGET-20-PANLIZ-09A-01D	FALSE		1.25277e-05	1.30497e-07	1.72641e-06	6.11099e-08	1.16628e-05
DO221196_TARGET-20-PANLRE-09A-01D	blood_myeloid	ICGC_WXS_AML_US_TARGET	FALSE	PROF						FALSE	DO221196	0	TARGET-20-PANLRE-09A-01D	FALSE		5.44123e-06	5.66795e-08	1.26648e-06	4.07947e-09	4.41039e-06
DO221199_TARGET-20-PANMEM-03A-01D	blood_myeloid	ICGC_WXS_AML_US_TARGET	FALSE	PROF						FALSE	DO221199	0	TARGET-20-PANMEM-03A-01D	FALSE						1.04747e-06
DO221220_TARGET-20-PANVGP-09A-01D	blood_myeloid	ICGC_WXS_AML_US_TARGET	FALSE	PROF						FALSE	DO221220	0	TARGET-20-PANVGP-09A-01D	FALSE		1.18849e-05	1.23801e-07	1.26291e-06	7.4275e-08	1.07691e-05
DO221259_TARGET-20-PARCVS-03A-01D	blood_myeloid	ICGC_WXS_AML_US_TARGET	FALSE	PROF						FALSE	DO221259	0	TARGET-20-PARCVS-03A-01D	FALSE		4.87262e-06	5.07564e-08	7.7486e-07	1.92737e-08	4.04951e-06
DO221259_TARGET-20-PARCVS-04A-01D	blood_myeloid	ICGC_WXS_AML_US_TARGET	FALSE	PROF						FALSE	DO221259	0	TARGET-20-PARCVS-04A-01D	FALSE		1.04245e-05	1.08589e-07	2.00965e-06	2.59341e-08	8.45884e-06
DO221273_TARGET-20-PARGVC-03A-01D	blood_myeloid	ICGC_WXS_AML_US_TARGET	FALSE	PROF						FALSE	DO221273	0	TARGET-20-PARGVC-03A-01D	FALSE		7.94039e-06	8.27124e-08	1.59349e-06	1.70264e-08	8.06145e-06
DO221279_TARGET-20-PARIEG-09A-04D	blood_myeloid	ICGC_WXS_AML_US_TARGET	FALSE	PROF						FALSE	DO221279	0	TARGET-20-PARIEG-09A-04D	FALSE		3.97346e-06	4.13902e-08	8.18631e-07	7.5971e-09	4.85838e-06
DO221308_TARGET-20-PARUNX-09A-01D	blood_myeloid	ICGC_WXS_AML_US_TARGET	FALSE	PROF						FALSE	DO221308	0	TARGET-20-PARUNX-09A-01D	FALSE		1.15451e-05	1.20262e-07	2.58524e-06	1.30888e-08	1.20038e-05
DO221317_TARGET-20-PARVUA-03A-01D	blood_myeloid	ICGC_WXS_AML_US_TARGET	FALSE	PROF						FALSE	DO221317	0	TARGET-20-PARVUA-03A-01D	FALSE		4.4239e-06	4.60823e-08	9.79667e-07	5.49171e-09	3.60481e-06
DO221322_TARGET-20-PARWXU-09A-01D	blood_myeloid	ICGC_WXS_AML_US_TARGET	FALSE	PROF						FALSE	DO221322	0	TARGET-20-PARWXU-09A-01D	FALSE		1.39473e-05	1.45284e-07	2.62705e-06	3.73813e-08	1.16794e-05
DO221359_TARGET-20-PASBBE-04A-02D	blood_myeloid	ICGC_WXS_AML_US_TARGET	FALSE	PROF						FALSE	DO221359	0	TARGET-20-PASBBE-04A-02D	FALSE		6.38825e-06	6.65443e-08	1.26648e-06	1.43732e-08	5.14564e-06
DO221359_TARGET-20-PASBBE-09A-01D	blood_myeloid	ICGC_WXS_AML_US_TARGET	FALSE	PROF						FALSE	DO221359	0	TARGET-20-PASBBE-09A-01D	FALSE		3.97346e-06	4.13902e-08	4.88048e-07	2.19703e-08	3.25845e-06
DO221399_TARGET-20-PASFEW-09A-01D	blood_myeloid	ICGC_WXS_AML_US_TARGET	FALSE	PROF						FALSE	DO221399	0	TARGET-20-PASFEW-09A-01D	FALSE		4.46956e-06	4.65579e-08	9.76095e-07	6.14324e-09	3.66092e-06
DO221449_TARGET-20-PASMYS-04A-02D	blood_myeloid	ICGC_WXS_AML_US_TARGET	FALSE	PROF						FALSE	DO221449	0	TARGET-20-PASMYS-04A-02D	FALSE		5.82727e-06	6.07007e-08	1.31025e-06	6.37248e-09	4.71862e-06
DO221449_TARGET-20-PASMYS-09A-02D	blood_myeloid	ICGC_WXS_AML_US_TARGET	FALSE	PROF						FALSE	DO221449	0	TARGET-20-PASMYS-09A-02D	FALSE		1.96648e-06	2.04841e-08	4.91619e-07	0	1.58294e-06
DO221468_TARGET-20-PASRTP-09A-01D	blood_myeloid	ICGC_WXS_AML_US_TARGET	FALSE	PROF						FALSE	DO221468	0	TARGET-20-PASRTP-09A-01D	FALSE		3.74251e-06	3.89845e-08	4.88048e-07	1.946e-08	3.55524e-06
DO221490_TARGET-20-PASZZE-04A-01D	blood_myeloid	ICGC_WXS_AML_US_TARGET	FALSE	PROF						FALSE	DO221490	0	TARGET-20-PASZZE-04A-01D	FALSE		7.94668e-06	8.2778e-08	1.8401e-06	6.37248e-09	6.417e-06
DO221490_TARGET-20-PASZZE-09A-01D	blood_myeloid	ICGC_WXS_AML_US_TARGET	FALSE	PROF						FALSE	DO221490	0	TARGET-20-PASZZE-09A-01D	FALSE		6.79943e-06	7.08274e-08	1.55329e-06	6.37248e-09	5.50171e-06
DO223858_TARGET-20-PARDEV-03A-01D	blood_myeloid	ICGC_WXS_AML_US_TARGET	FALSE	PROF						FALSE	DO223858	0	TARGET-20-PARDEV-03A-01D	FALSE		1.96648e-06	2.04841e-08	4.91619e-07	0	2.00122e-06
DO223861_TARGET-20-PARNNT-09A-01D	blood_myeloid	ICGC_WXS_AML_US_TARGET	FALSE	PROF						FALSE	DO223861	0	TARGET-20-PARNNT-09A-01D	FALSE		3.91867e-06	4.08194e-08	9.79667e-07	0	3.18288e-06
DO223864_TARGET-20-PARPPY-09A-02D	blood_myeloid	ICGC_WXS_AML_US_TARGET	FALSE	PROF						FALSE	DO223864	0	TARGET-20-PARPPY-09A-02D	FALSE		1.78478e-06	1.85915e-08	3.30583e-07	5.02662e-09	1.44781e-06
DO223864_TARGET-20-PARPPY-40A-01D	blood_myeloid	ICGC_WXS_AML_US_TARGET	FALSE	PROF						FALSE	DO223864	0	TARGET-20-PARPPY-40A-01D	FALSE		1.78478e-06	1.85915e-08	3.30583e-07	5.02662e-09	1.44781e-06
DO223874_TARGET-20-PASCRZ-03A-01D	blood_myeloid	ICGC_WXS_AML_US_TARGET	FALSE	PROF						FALSE	DO223874	0	TARGET-20-PASCRZ-03A-01D	FALSE		1.95219e-06	2.03353e-08	4.88048e-07	0	1.59994e-06
DO223879_TARGET-20-PASINN-04A-02D	blood_myeloid	ICGC_WXS_AML_US_TARGET	FALSE	PROF						FALSE	DO223879	0	TARGET-20-PASINN-04A-02D	FALSE		2.40111e-06	2.50116e-08	4.88048e-07	4.87961e-09	2.88175e-06
DO223879_TARGET-20-PASINN-09A-01D	blood_myeloid	ICGC_WXS_AML_US_TARGET	FALSE	PROF						FALSE	DO223879	0	TARGET-20-PASINN-09A-01D	FALSE		3.04096e-06	3.16766e-08	4.88048e-07	1.18344e-08	2.46061e-06
DO233954_7_1	blood_lymphoid	ICGC_WXS_BPLL_FR	FALSE	PROF						FALSE	DO233954	0	7_1	FALSE		1.65269e-05	1.72155e-07	1.83653e-06	9.97907e-08	1.45692e-05
DO233955_8_1	blood_lymphoid	ICGC_WXS_BPLL_FR	FALSE	PROF						FALSE	DO233955	0	8_1	FALSE		1.07426e-05	1.11902e-07	1.4798e-06	5.24283e-08	1.03514e-05
DO233956_9_1	blood_lymphoid	ICGC_WXS_BPLL_FR	FALSE	PROF						FALSE	DO233956	0	9_1	FALSE		8.30134e-06	8.64723e-08	6.61167e-07	6.14856e-08	7.89212e-06
DO233957_10_1	blood_lymphoid	ICGC_WXS_BPLL_FR	FALSE	PROF						FALSE	DO233957	0	10_1	FALSE		1.49178e-05	1.55394e-07	1.59706e-06	9.27123e-08	1.2995e-05
DO233958_11_1	blood_lymphoid	ICGC_WXS_BPLL_FR	FALSE	PROF						FALSE	DO233958	0	11_1	FALSE		1.88177e-05	1.96018e-07	2.74985e-06	8.49819e-08	1.92009e-05
DO233960_12_1	blood_lymphoid	ICGC_WXS_BPLL_FR	FALSE	PROF						FALSE	DO233960	0	12_1	FALSE		1.22179e-05	1.2727e-07	9.04208e-07	9.34901e-08	1.20432e-05
DO233961_13_1	blood_lymphoid	ICGC_WXS_BPLL_FR	FALSE	PROF						FALSE	DO233961	0	13_1	FALSE		1.4321e-05	1.49177e-07	2.12692e-06	6.31886e-08	1.19906e-05
DO233963_14_1	blood_lymphoid	ICGC_WXS_BPLL_FR	FALSE	PROF						FALSE	DO233963	0	14_1	FALSE		1.60624e-05	1.67317e-07	1.6444e-06	1.03095e-07	1.57311e-05
DO233964_15_1	blood_lymphoid	ICGC_WXS_BPLL_FR	FALSE	PROF						FALSE	DO233964	0	15_1	FALSE		1.08261e-05	1.12772e-07	1.67907e-06	4.46724e-08	1.13792e-05
DO233967_16_1	blood_lymphoid	ICGC_WXS_BPLL_FR	FALSE	PROF						FALSE	DO233967	0	16_1	FALSE		1.89528e-05	1.97425e-07	3.14321e-06	6.93471e-08	1.57809e-05
DO234447_1_1	blood_lymphoid	ICGC_WXS_BPLL_FR	FALSE	PROF						FALSE	DO234447	0	1_1	FALSE		1.35895e-05	1.41558e-07	1.59706e-06	7.8275e-08	1.29434e-05
DO234452_2_1	blood_lymphoid	ICGC_WXS_BPLL_FR	FALSE	PROF						FALSE	DO234452	0	2_1	FALSE		1.82155e-05	1.89745e-07	1.55329e-06	1.3046e-07	1.63014e-05
DO234454_3_1	blood_lymphoid	ICGC_WXS_BPLL_FR	FALSE	PROF						FALSE	DO234454	0	3_1	FALSE		1.81214e-05	1.88765e-07	2.28992e-06	9.74106e-08	1.56468e-05
DO234456_4_1	blood_lymphoid	ICGC_WXS_BPLL_FR	FALSE	PROF						FALSE	DO234456	0	4_1	FALSE		6.81865e-06	7.10276e-08	3.30583e-07	5.97426e-08	6.19452e-06
DO234458_5_1	blood_lymphoid	ICGC_WXS_BPLL_FR	FALSE	PROF						FALSE	DO234458	0	5_1	FALSE		7.14047e-06	7.43799e-08	9.9175e-07	3.44943e-08	7.85664e-06
DO234460_6_1	blood_lymphoid	ICGC_WXS_BPLL_FR	FALSE	PROF						FALSE	DO234460	0	6_1	FALSE		9.46917e-06	9.86372e-08	1.47783e-06	3.86722e-08	8.54707e-06
DO223355_142-06-01TD	blood_lymphoid	ICGC_WXS_CLLE_ES	FALSE	PROF						FALSE	DO223355	0	142-06-01TD	FALSE		1.14625e-05	1.19401e-07	1.93122e-06	4.06263e-08	1.15578e-05
DO223356_365-1951-01TD	blood_lymphoid	ICGC_WXS_CLLE_ES	FALSE	PROF						FALSE	DO223356	0	365-1951-01TD	FALSE		3.12431e-05	3.25449e-07	4.296e-06	1.52816e-07	2.6793e-05
DO223357_384-02-01TD	blood_lymphoid	ICGC_WXS_CLLE_ES	FALSE	PROF						FALSE	DO223357	0	384-02-01TD	FALSE		1.49555e-05	1.55786e-07	1.6444e-06	9.10637e-08	1.62539e-05
DO223358_397-01-1TD	blood_lymphoid	ICGC_WXS_CLLE_ES	FALSE	PROF						FALSE	DO223358	0	397-01-1TD	FALSE		1.02679e-05	1.06958e-07	1.27856e-06	5.60184e-08	9.40766e-06
DO223359_560-01-5TD	blood_lymphoid	ICGC_WXS_CLLE_ES	FALSE	PROF						FALSE	DO223359	0	560-01-5TD	FALSE		1.95831e-05	2.03991e-07	2.08511e-06	1.22203e-07	2.09093e-05
DO223360_566-01-12TD	blood_lymphoid	ICGC_WXS_CLLE_ES	FALSE	PROF						FALSE	DO223360	0	566-01-12TD	FALSE		1.31918e-05	1.37415e-07	1.7581e-06	6.69501e-08	1.07669e-05
DO223361_567-01-4TD	blood_lymphoid	ICGC_WXS_CLLE_ES	FALSE	PROF						FALSE	DO223361	0	567-01-4TD	FALSE		2.41389e-05	2.51447e-07	4.44989e-06	6.89055e-08	2.41964e-05
DO223362_595-01-1TD	blood_lymphoid	ICGC_WXS_CLLE_ES	FALSE	PROF						FALSE	DO223362	0	595-01-1TD	FALSE		1.71768e-05	1.78925e-07	2.83185e-06	6.35799e-08	1.69462e-05
DO223363_664-02-5TD	blood_lymphoid	ICGC_WXS_CLLE_ES	FALSE	PROF						FALSE	DO223363	0	664-02-5TD	FALSE		4.81965e-06	5.02046e-08	4.91619e-07	3.10127e-08	4.63644e-06
DO223364_676-01-1TD	blood_lymphoid	ICGC_WXS_CLLE_ES	FALSE	PROF						FALSE	DO223364	0	676-01-1TD	FALSE		7.63358e-06	7.95165e-08	3.30583e-07	6.86005e-08	9.5068e-06
DO223365_689-02-6TD	blood_lymphoid	ICGC_WXS_CLLE_ES	FALSE	PROF						FALSE	DO223365	0	689-02-6TD	FALSE		1.63927e-05	1.70757e-07	2.65516e-06	6.27394e-08	1.67614e-05
DO223366_715-03-4TD	blood_lymphoid	ICGC_WXS_CLLE_ES	FALSE	PROF						FALSE	DO223366	0	715-03-4TD	FALSE		2.11364e-05	2.20171e-07	2.53296e-06	1.19615e-07	2.02614e-05
DO223367_725-02-3TD	blood_lymphoid	ICGC_WXS_CLLE_ES	FALSE	PROF						FALSE	DO223367	0	725-02-3TD	FALSE		2.02275e-05	2.10703e-07	2.57316e-06	1.07988e-07	2.30112e-05
DO223368_732-02-5TD	blood_lymphoid	ICGC_WXS_CLLE_ES	FALSE	PROF						FALSE	DO223368	0	732-02-5TD	FALSE		1.00306e-05	1.04485e-07	4.91619e-07	8.76533e-08	1.08068e-05
DO223369_765-01-1TD	blood_lymphoid	ICGC_WXS_CLLE_ES	FALSE	PROF						FALSE	DO223369	0	765-01-1TD	FALSE		2.54827e-05	2.65445e-07	3.69426e-06	1.16366e-07	2.45602e-05
DO223370_777-01-2TD	blood_lymphoid	ICGC_WXS_CLLE_ES	FALSE	PROF						FALSE	DO223370	0	777-01-2TD	FALSE		4.87249e-06	5.07551e-08	8.22202e-07	1.72139e-08	3.92216e-06
DO223371_812-01-5TD	blood_lymphoid	ICGC_WXS_CLLE_ES	FALSE	PROF						FALSE	DO223371	0	812-01-5TD	FALSE		2.07187e-05	2.1582e-07	2.45589e-06	1.18425e-07	2.02929e-05
DO223372_820-01-11TD	blood_lymphoid	ICGC_WXS_CLLE_ES	FALSE	PROF						FALSE	DO223372	0	820-01-11TD	FALSE		1.36183e-05	1.41857e-07	1.75096e-06	7.18964e-08	1.19786e-05
DO223376_854-01-6TD	blood_lymphoid	ICGC_WXS_CLLE_ES	FALSE	PROF						FALSE	DO223376	0	854-01-6TD	FALSE		2.15154e-05	2.24119e-07	8.18631e-07	1.9827e-07	2.12818e-05
DO223377_861-01-12TD	blood_lymphoid	ICGC_WXS_CLLE_ES	FALSE	PROF						FALSE	DO223377	0	861-01-12TD	FALSE		1.33355e-05	1.38911e-07	1.27856e-06	8.93613e-08	1.46138e-05
DO223379_873-01-5TD	blood_lymphoid	ICGC_WXS_CLLE_ES	FALSE	PROF						FALSE	DO223379	0	873-01-5TD	FALSE		1.58521e-05	1.65126e-07	1.92407e-06	8.86497e-08	1.51306e-05
DO223380_874-01-5TD	blood_lymphoid	ICGC_WXS_CLLE_ES	FALSE	PROF						FALSE	DO223380	0	874-01-5TD	FALSE		2.20197e-05	2.29372e-07	1.72641e-06	1.64283e-07	1.94863e-05
DO223382_881-01-6TD	blood_lymphoid	ICGC_WXS_CLLE_ES	FALSE	PROF						FALSE	DO223382	0	881-01-6TD	FALSE		1.2698e-05	1.32271e-07	6.17396e-07	1.11178e-07	1.04885e-05
DO223383_882-01-9TD	blood_lymphoid	ICGC_WXS_CLLE_ES	FALSE	PROF						FALSE	DO223383	0	882-01-9TD	FALSE		2.93596e-05	3.05829e-07	3.54568e-06	1.64966e-07	2.57561e-05
DO223384_884-01-8TD	blood_lymphoid	ICGC_WXS_CLLE_ES	FALSE	PROF						FALSE	DO223384	0	884-01-8TD	FALSE		1.99237e-05	2.07538e-07	1.92407e-06	1.32906e-07	1.99411e-05
DO223385_886-01-8TD	blood_lymphoid	ICGC_WXS_CLLE_ES	FALSE	PROF						FALSE	DO223385	0	886-01-8TD	FALSE		1.99654e-05	2.07973e-07	2.83185e-06	9.38912e-08	2.13864e-05
DO223389_1062-01-04TD	blood_lymphoid	ICGC_WXS_CLLE_ES	FALSE	PROF						FALSE	DO223389	0	1062-01-04TD	FALSE		1.1912e-05	1.24084e-07	8.22202e-07	9.37306e-08	1.62894e-05
DO223392_1098-01-02TD	blood_lymphoid	ICGC_WXS_CLLE_ES	FALSE	PROF						FALSE	DO223392	0	1098-01-02TD	FALSE		1.62342e-05	1.69106e-07	2.36835e-06	7.34865e-08	1.57534e-05
DO223393_1161-01-01TD	blood_lymphoid	ICGC_WXS_CLLE_ES	FALSE	PROF						FALSE	DO223393	0	1161-01-01TD	FALSE		1.47288e-05	1.53425e-07	1.54972e-06	9.27163e-08	1.63867e-05
DO223394_1162-01-01TD	blood_lymphoid	ICGC_WXS_CLLE_ES	FALSE	PROF						FALSE	DO223394	0	1162-01-01TD	FALSE		1.05648e-05	1.1005e-07	1.83653e-06	3.49856e-08	1.28134e-05
DO223396_1177-01-02TD	blood_lymphoid	ICGC_WXS_CLLE_ES	FALSE	PROF						FALSE	DO223396	0	1177-01-02TD	FALSE		9.22162e-06	9.60586e-08	1.34848e-06	4.16053e-08	1.084e-05
DO223406_1338-01-02TD	blood_lymphoid	ICGC_WXS_CLLE_ES	FALSE	PROF						FALSE	DO223406	0	1338-01-02TD	FALSE		9.16337e-06	9.54518e-08	1.59706e-06	3.01644e-08	1.1986e-05
DO223408_1343-01-04TD	blood_lymphoid	ICGC_WXS_CLLE_ES	FALSE	PROF						FALSE	DO223408	0	1343-01-04TD	FALSE		1.9187e-05	1.99865e-07	1.59706e-06	1.39117e-07	2.33206e-05
DO223415_1386-01-3TD	blood_lymphoid	ICGC_WXS_CLLE_ES	FALSE	PROF						FALSE	DO223415	0	1386-01-3TD	FALSE		1.09315e-05	1.13869e-07	1.14921e-06	6.88543e-08	1.57677e-05
DO223416_1403-01-01TD	blood_lymphoid	ICGC_WXS_CLLE_ES	FALSE	PROF						FALSE	DO223416	0	1403-01-01TD	FALSE		1.00836e-05	1.05038e-07	1.59349e-06	4.03223e-08	1.44349e-05
DO223417_1407-01-03TD	blood_lymphoid	ICGC_WXS_CLLE_ES	FALSE	PROF						FALSE	DO223417	0	1407-01-03TD	FALSE		1.08197e-05	1.12705e-07	1.06167e-06	7.14453e-08	1.15851e-05
DO223418_1413-01-03TD	blood_lymphoid	ICGC_WXS_CLLE_ES	FALSE	PROF						FALSE	DO223418	0	1413-01-03TD	FALSE		7.27055e-06	7.57349e-08	9.04208e-07	3.97143e-08	1.18684e-05
DO223419_1418-01-01TD	blood_lymphoid	ICGC_WXS_CLLE_ES	FALSE	PROF						FALSE	DO223419	0	1418-01-01TD	FALSE		2.75371e-05	2.86845e-07	2.57673e-06	1.87285e-07	3.36453e-05
DO223423_1437-01-03TD	blood_lymphoid	ICGC_WXS_CLLE_ES	FALSE	PROF						FALSE	DO223423	0	1437-01-03TD	FALSE		1.01606e-05	1.0584e-07	1.26648e-06	5.5377e-08	1.0352e-05
DO223424_1441-01-03TD	blood_lymphoid	ICGC_WXS_CLLE_ES	FALSE	PROF						FALSE	DO223424	0	1441-01-03TD	FALSE		7.29192e-06	7.59575e-08	2.86812e-07	6.67899e-08	9.00167e-06
DO223425_1442-01-03TD	blood_lymphoid	ICGC_WXS_CLLE_ES	FALSE	PROF						FALSE	DO223425	0	1442-01-03TD	FALSE		6.24775e-06	6.50807e-08	4.91619e-07	4.65356e-08	9.71561e-06
DO223427_1447-01-02TD	blood_lymphoid	ICGC_WXS_CLLE_ES	FALSE	PROF						FALSE	DO223427	0	1447-01-02TD	FALSE		1.02015e-05	1.06266e-07	4.88048e-07	8.96668e-08	1.24671e-05
DO223428_1448-01-1TD	blood_lymphoid	ICGC_WXS_CLLE_ES	FALSE	PROF						FALSE	DO223428	0	1448-01-1TD	FALSE		1.54898e-05	1.61352e-07	2.09719e-06	7.71852e-08	1.68194e-05
DO223429_1452-01-04TD	blood_lymphoid	ICGC_WXS_CLLE_ES	FALSE	PROF						FALSE	DO223429	0	1452-01-04TD	FALSE		1.74428e-05	1.81696e-07	2.57673e-06	7.75642e-08	2.05662e-05
DO223430_1459-01-01TD	blood_lymphoid	ICGC_WXS_CLLE_ES	FALSE	PROF						FALSE	DO223430	0	1459-01-01TD	FALSE		1.04107e-05	1.08445e-07	1.39226e-06	5.2627e-08	1.30412e-05
DO223431_1462-01-01TD	blood_lymphoid	ICGC_WXS_CLLE_ES	FALSE	PROF						FALSE	DO223431	0	1462-01-01TD	FALSE		1.70121e-05	1.7721e-07	1.39226e-06	1.24381e-07	2.43503e-05
DO223432_1465-01-03TD	blood_lymphoid	ICGC_WXS_CLLE_ES	FALSE	PROF						FALSE	DO223432	0	1465-01-03TD	FALSE		1.51215e-05	1.57516e-07	1.6444e-06	9.28687e-08	1.93353e-05
DO223434_1479-01-3TD	blood_lymphoid	ICGC_WXS_CLLE_ES	FALSE	PROF						FALSE	DO223434	0	1479-01-3TD	FALSE		1.45021e-05	1.51064e-07	1.31025e-06	1.00664e-07	1.64274e-05
DO223436_1507-01-1TD	blood_lymphoid	ICGC_WXS_CLLE_ES	FALSE	PROF						FALSE	DO223436	0	1507-01-1TD	FALSE		1.55525e-05	1.62006e-07	2.54147e-06	5.85505e-08	1.50618e-05
DO223437_1512-01-1TD	blood_lymphoid	ICGC_WXS_CLLE_ES	FALSE	PROF						FALSE	DO223437	0	1512-01-1TD	FALSE		1.004e-05	1.04583e-07	1.10901e-06	6.09119e-08	1.42702e-05
DO223439_1533-01-03TD	blood_lymphoid	ICGC_WXS_CLLE_ES	FALSE	PROF						FALSE	DO223439	0	1533-01-03TD	FALSE		1.2438e-05	1.29562e-07	1.8401e-06	5.51911e-08	1.55034e-05
DO223440_1534-01-02TD	blood_lymphoid	ICGC_WXS_CLLE_ES	FALSE	PROF						FALSE	DO223440	0	1534-01-02TD	FALSE		1.55502e-05	1.61982e-07	1.47129e-06	1.05055e-07	1.7318e-05
DO223441_1535-01-03TD	blood_lymphoid	ICGC_WXS_CLLE_ES	FALSE	PROF						FALSE	DO223441	0	1535-01-03TD	FALSE		1.29189e-05	1.34572e-07	1.80842e-06	6.17962e-08	1.54493e-05
DO223442_1543-01-01TD	blood_lymphoid	ICGC_WXS_CLLE_ES	FALSE	PROF						FALSE	DO223442	0	1543-01-01TD	FALSE		2.05513e-05	2.14076e-07	2.41926e-06	1.18198e-07	2.2055e-05
DO223443_1545-01-01TD	blood_lymphoid	ICGC_WXS_CLLE_ES	FALSE	PROF						FALSE	DO223443	0	1545-01-01TD	FALSE		1.83194e-05	1.90828e-07	1.64083e-06	1.27784e-07	2.30348e-05
DO223444_034-0071-01TD	blood_lymphoid	ICGC_WXS_CLLE_ES	FALSE	PROF						FALSE	DO223444	0	034-0071-01TD	FALSE		1.23128e-05	1.28258e-07	1.26291e-06	7.89259e-08	1.42514e-05
DO223445_057-0119-01TD	blood_lymphoid	ICGC_WXS_CLLE_ES	FALSE	PROF						FALSE	DO223445	0	057-0119-01TD	FALSE		1.4066e-05	1.46521e-07	9.79667e-07	1.10297e-07	1.26067e-05
DO223446_070-05-01TD	blood_lymphoid	ICGC_WXS_CLLE_ES	FALSE	PROF						FALSE	DO223446	0	070-05-01TD	FALSE		2.30887e-05	2.40507e-07	3.50905e-06	9.83964e-08	2.71021e-05
DO223447_111-03-1TD	blood_lymphoid	ICGC_WXS_CLLE_ES	FALSE	PROF						FALSE	DO223447	0	111-03-1TD	FALSE		1.3923e-05	1.45031e-07	8.22202e-07	1.15589e-07	1.74809e-05
DO223448_114-1920-01TD	blood_lymphoid	ICGC_WXS_CLLE_ES	FALSE	PROF						FALSE	DO223448	0	114-1920-01TD	FALSE		1.17843e-05	1.22753e-07	9.79667e-07	8.54963e-08	1.75836e-05
DO223449_127-06-01TD	blood_lymphoid	ICGC_WXS_CLLE_ES	FALSE	PROF						FALSE	DO223449	0	127-06-01TD	FALSE		9.32425e-06	9.71276e-08	3.30583e-07	8.69774e-08	1.08067e-05
DO223452_190-07-01TD	blood_lymphoid	ICGC_WXS_CLLE_ES	FALSE	PROF						FALSE	DO223452	0	190-07-01TD	FALSE		1.42249e-05	1.48176e-07	7.7486e-07	1.20929e-07	1.64603e-05
DO223453_284-01-1TD	blood_lymphoid	ICGC_WXS_CLLE_ES	FALSE	PROF						FALSE	DO223453	0	284-01-1TD	FALSE		1.34832e-05	1.4045e-07	1.7983e-06	6.83692e-08	1.41883e-05
DO223454_287-01-4TD	blood_lymphoid	ICGC_WXS_CLLE_ES	FALSE	PROF						FALSE	DO223454	0	287-01-4TD	FALSE		7.05326e-06	7.34715e-08	6.61167e-07	4.79195e-08	6.72478e-06
DO223455_289-01-3TD	blood_lymphoid	ICGC_WXS_CLLE_ES	FALSE	PROF						FALSE	DO223455	0	289-01-3TD	FALSE		1.66574e-05	1.73515e-07	1.31025e-06	1.24091e-07	1.84344e-05
DO223457_376-01-4TD	blood_lymphoid	ICGC_WXS_CLLE_ES	FALSE	PROF						FALSE	DO223457	0	376-01-4TD	FALSE		7.6127e-06	7.9299e-08	3.30583e-07	6.83736e-08	7.19036e-06
DO223458_380-01-1TD	blood_lymphoid	ICGC_WXS_CLLE_ES	FALSE	PROF						FALSE	DO223458	0	380-01-1TD	FALSE		1.13448e-05	1.18175e-07	5.73625e-07	9.83729e-08	1.32667e-05
DO223459_385-05-01TD	blood_lymphoid	ICGC_WXS_CLLE_ES	FALSE	PROF						FALSE	DO223459	0	385-05-01TD	FALSE		2.11689e-05	2.2051e-07	2.50127e-06	1.21346e-07	2.29476e-05
DO223460_474-02-1TD	blood_lymphoid	ICGC_WXS_CLLE_ES	FALSE	PROF						FALSE	DO223460	0	474-02-1TD	FALSE		1.05511e-05	1.09907e-07	2.86812e-07	1.02216e-07	1.66961e-05
DO223462_504-04-02TD	blood_lymphoid	ICGC_WXS_CLLE_ES	FALSE	PROF						FALSE	DO223462	0	504-04-02TD	FALSE		9.25724e-06	9.64296e-08	9.79667e-07	5.8028e-08	1.05773e-05
DO223463_505-02-2TD	blood_lymphoid	ICGC_WXS_CLLE_ES	FALSE	PROF						FALSE	DO223463	0	505-02-2TD	FALSE		1.41486e-05	1.47382e-07	1.43603e-06	9.13535e-08	1.46492e-05
DO223464_591-01-1TD	blood_lymphoid	ICGC_WXS_CLLE_ES	FALSE	PROF						FALSE	DO223464	0	591-01-1TD	FALSE		1.89562e-05	1.9746e-07	2.08154e-06	1.15544e-07	2.71653e-05
DO223465_598-03-01TD	blood_lymphoid	ICGC_WXS_CLLE_ES	FALSE	PROF						FALSE	DO223465	0	598-03-01TD	FALSE		6.03851e-06	6.29012e-08	1.10544e-06	1.75733e-08	7.28303e-06
DO223466_599-01-1TD	blood_lymphoid	ICGC_WXS_CLLE_ES	FALSE	PROF						FALSE	DO223466	0	599-01-1TD	FALSE		1.75429e-05	1.82739e-07	2.24972e-06	9.28703e-08	1.81749e-05
DO223467_658-03-03TD	blood_lymphoid	ICGC_WXS_CLLE_ES	FALSE	PROF						FALSE	DO223467	0	658-03-03TD	FALSE		1.08958e-05	1.13498e-07	7.78431e-07	8.45881e-08	1.39721e-05
DO223468_709-02-4TD	blood_lymphoid	ICGC_WXS_CLLE_ES	FALSE	PROF						FALSE	DO223468	0	709-02-4TD	FALSE		1.38974e-05	1.44765e-07	1.31025e-06	9.40912e-08	1.64735e-05
DO223469_721-06-01TD	blood_lymphoid	ICGC_WXS_CLLE_ES	FALSE	PROF						FALSE	DO223469	0	721-06-01TD	FALSE		1.91525e-05	1.99505e-07	5.73625e-07	1.83239e-07	2.33154e-05
DO223470_727-02-4TD	blood_lymphoid	ICGC_WXS_CLLE_ES	FALSE	PROF						FALSE	DO223470	0	727-02-4TD	FALSE		1.4693e-05	1.53052e-07	1.31025e-06	1.02739e-07	1.24149e-05
DO223471_760-03-01TD	blood_lymphoid	ICGC_WXS_CLLE_ES	FALSE	PROF						FALSE	DO223471	0	760-03-01TD	FALSE		1.77267e-05	1.84653e-07	1.10901e-06	1.44464e-07	1.95954e-05
DO223472_764-01-9TD	blood_lymphoid	ICGC_WXS_CLLE_ES	FALSE	PROF						FALSE	DO223472	0	764-01-9TD	FALSE		1.2866e-05	1.34021e-07	9.47979e-07	9.86316e-08	1.55991e-05
DO223473_775-05-01TD	blood_lymphoid	ICGC_WXS_CLLE_ES	FALSE	PROF						FALSE	DO223473	0	775-05-01TD	FALSE		8.1208e-06	8.45916e-08	1.10544e-06	4.02068e-08	8.55239e-06
DO223474_829-01-3TD	blood_lymphoid	ICGC_WXS_CLLE_ES	FALSE	PROF						FALSE	DO223474	0	829-01-3TD	FALSE		1.01616e-05	1.0585e-07	1.64083e-06	3.91117e-08	1.18626e-05
DO223475_830-01-3TD	blood_lymphoid	ICGC_WXS_CLLE_ES	FALSE	PROF						FALSE	DO223475	0	830-01-3TD	FALSE		1.02177e-05	1.06435e-07	9.83238e-07	6.83128e-08	1.02406e-05
DO223476_831-01-4TD	blood_lymphoid	ICGC_WXS_CLLE_ES	FALSE	PROF						FALSE	DO223476	0	831-01-4TD	FALSE		1.23721e-05	1.28877e-07	4.88048e-07	1.1326e-07	1.17687e-05
DO223477_850-01-6TD	blood_lymphoid	ICGC_WXS_CLLE_ES	FALSE	PROF						FALSE	DO223477	0	850-01-6TD	FALSE		1.86757e-05	1.94539e-07	1.5216e-06	1.36841e-07	2.68194e-05
DO223478_852-01-1TD	blood_lymphoid	ICGC_WXS_CLLE_ES	FALSE	PROF						FALSE	DO223478	0	852-01-1TD	FALSE		1.04422e-05	1.08772e-07	5.73625e-07	8.85615e-08	1.69111e-05
DO223479_860-01-8TD	blood_lymphoid	ICGC_WXS_CLLE_ES	FALSE	PROF						FALSE	DO223479	0	860-01-8TD	FALSE		6.92669e-06	7.2153e-08	9.76095e-07	3.28512e-08	5.6718e-06
DO223480_868-01-7TD	blood_lymphoid	ICGC_WXS_CLLE_ES	FALSE	PROF						FALSE	DO223480	0	868-01-7TD	FALSE		1.9467e-05	2.02781e-07	3.03309e-06	7.97246e-08	1.76908e-05
DO223481_869-01-2TD	blood_lymphoid	ICGC_WXS_CLLE_ES	FALSE	PROF						FALSE	DO223481	0	869-01-2TD	FALSE		1.48709e-05	1.54905e-07	1.54972e-06	9.4261e-08	1.90515e-05
DO223483_1047-02-8TD	blood_lymphoid	ICGC_WXS_CLLE_ES	FALSE	PROF						FALSE	DO223483	0	1047-02-8TD	FALSE		9.28851e-06	9.67553e-08	7.7486e-07	6.72725e-08	1.10133e-05
DO223484_1050-03-02TD	blood_lymphoid	ICGC_WXS_CLLE_ES	FALSE	PROF						FALSE	DO223484	0	1050-03-02TD	FALSE		1.86534e-05	1.94306e-07	3.43556e-06	5.33821e-08	1.97203e-05
DO223485_1052-01-5TD	blood_lymphoid	ICGC_WXS_CLLE_ES	FALSE	PROF						FALSE	DO223485	0	1052-01-5TD	FALSE		2.99052e-05	3.11512e-07	1.97142e-06	2.39342e-07	3.3287e-05
DO223486_1053-01-4TD	blood_lymphoid	ICGC_WXS_CLLE_ES	FALSE	PROF						FALSE	DO223486	0	1053-01-4TD	FALSE		1.75321e-05	1.82626e-07	2.54861e-06	7.97572e-08	1.84572e-05
DO223487_1054-01-8TD	blood_lymphoid	ICGC_WXS_CLLE_ES	FALSE	PROF						FALSE	DO223487	0	1054-01-8TD	FALSE		1.42252e-05	1.48179e-07	6.17396e-07	1.27778e-07	1.32752e-05
DO223489_1063-01-01TD	blood_lymphoid	ICGC_WXS_CLLE_ES	FALSE	PROF						FALSE	DO223489	0	1063-01-01TD	FALSE		1.61523e-05	1.68253e-07	2.74271e-06	5.63199e-08	1.69995e-05
DO223490_1066-01-6TD	blood_lymphoid	ICGC_WXS_CLLE_ES	FALSE	PROF						FALSE	DO223490	0	1066-01-6TD	FALSE		2.09168e-05	2.17884e-07	3.52471e-06	7.41089e-08	1.69406e-05
DO223491_1075-05-1TD	blood_lymphoid	ICGC_WXS_CLLE_ES	FALSE	PROF						FALSE	DO223491	0	1075-05-1TD	FALSE		1.83057e-05	1.90685e-07	1.06167e-06	1.52816e-07	1.7707e-05
DO223492_1080-01-04TD	blood_lymphoid	ICGC_WXS_CLLE_ES	FALSE	PROF						FALSE	DO223492	0	1080-01-04TD	FALSE		6.30413e-06	6.56681e-08	3.30583e-07	5.415e-08	9.962e-06
DO223493_1096-04-01TD	blood_lymphoid	ICGC_WXS_CLLE_ES	FALSE	PROF						FALSE	DO223493	0	1096-04-01TD	FALSE		1.5422e-05	1.60646e-07	3.03309e-06	3.57573e-08	2.27189e-05
DO223494_1141-02-01TD	blood_lymphoid	ICGC_WXS_CLLE_ES	FALSE	PROF						FALSE	DO223494	0	1141-02-01TD	FALSE		1.23237e-05	1.28372e-07	3.30583e-07	1.1958e-07	1.20653e-05
DO223495_1187-01-02TD	blood_lymphoid	ICGC_WXS_CLLE_ES	FALSE	PROF						FALSE	DO223495	0	1187-01-02TD	FALSE		3.61683e-06	3.76753e-08	9.04208e-07	0	4.00489e-06
DO223496_1188-01-02TD	blood_lymphoid	ICGC_WXS_CLLE_ES	FALSE	PROF						FALSE	DO223496	0	1188-01-02TD	FALSE		9.00909e-06	9.38447e-08	1.26291e-06	4.30159e-08	1.26808e-05
DO223497_1193-01-02TD	blood_lymphoid	ICGC_WXS_CLLE_ES	FALSE	PROF						FALSE	DO223497	0	1193-01-02TD	FALSE		9.27321e-06	9.65959e-08	2.86812e-07	8.83256e-08	1.12026e-05
DO223498_1195-01-01TD	blood_lymphoid	ICGC_WXS_CLLE_ES	FALSE	PROF						FALSE	DO223498	0	1195-01-01TD	FALSE		1.37227e-05	1.42945e-07	7.78431e-07	1.15315e-07	1.32244e-05
DO223499_1196-01-02TD	blood_lymphoid	ICGC_WXS_CLLE_ES	FALSE	PROF						FALSE	DO223499	0	1196-01-02TD	FALSE		1.14832e-05	1.19616e-07	5.73625e-07	9.98768e-08	1.7257e-05
DO223500_1198-03-03TD	blood_lymphoid	ICGC_WXS_CLLE_ES	FALSE	PROF						FALSE	DO223500	0	1198-03-03TD	FALSE		1.26183e-05	1.31441e-07	4.88048e-07	1.15936e-07	2.04943e-05
DO223502_1226-01-03TD	blood_lymphoid	ICGC_WXS_CLLE_ES	FALSE	PROF						FALSE	DO223502	0	1226-01-03TD	FALSE		8.19476e-06	8.53621e-08	6.61167e-07	6.03271e-08	9.70306e-06
DO223503_1229-01-02TD	blood_lymphoid	ICGC_WXS_CLLE_ES	FALSE	PROF						FALSE	DO223503	0	1229-01-02TD	FALSE		1.12421e-05	1.17105e-07	1.30668e-06	6.53845e-08	1.50969e-05
DO223504_1236-01-03TD	blood_lymphoid	ICGC_WXS_CLLE_ES	FALSE	PROF						FALSE	DO223504	0	1236-01-03TD	FALSE		2.10891e-05	2.19678e-07	2.90731e-06	1.02825e-07	2.45502e-05
DO223505_1237-01-03TD	blood_lymphoid	ICGC_WXS_CLLE_ES	FALSE	PROF						FALSE	DO223505	0	1237-01-03TD	FALSE		1.18551e-05	1.23491e-07	1.46414e-06	6.52018e-08	1.56708e-05
DO223506_1238-01-03TD	blood_lymphoid	ICGC_WXS_CLLE_ES	FALSE	PROF						FALSE	DO223506	0	1238-01-03TD	FALSE		2.25705e-05	2.3511e-07	3.52114e-06	9.22389e-08	2.15661e-05
DO223507_1239-01-2TD	blood_lymphoid	ICGC_WXS_CLLE_ES	FALSE	PROF						FALSE	DO223507	0	1239-01-2TD	FALSE		1.50995e-05	1.57286e-07	1.95576e-06	7.90916e-08	1.71371e-05
DO223508_1254-01-03TD	blood_lymphoid	ICGC_WXS_CLLE_ES	FALSE	PROF						FALSE	DO223508	0	1254-01-03TD	FALSE		1.07909e-05	1.12406e-07	1.30668e-06	6.04807e-08	1.34855e-05
DO223509_1256-01-01TD	blood_lymphoid	ICGC_WXS_CLLE_ES	FALSE	PROF						FALSE	DO223509	0	1256-01-01TD	FALSE		2.18516e-05	2.27621e-07	3.06478e-06	1.04266e-07	2.4037e-05
DO223510_1257-01-01TD	blood_lymphoid	ICGC_WXS_CLLE_ES	FALSE	PROF						FALSE	DO223510	0	1257-01-01TD	FALSE		1.11577e-05	1.16226e-07	1.55329e-06	5.37446e-08	1.88227e-05
DO223511_1260-01-01TD	blood_lymphoid	ICGC_WXS_CLLE_ES	FALSE	PROF						FALSE	DO223511	0	1260-01-01TD	FALSE		1.95196e-05	2.03329e-07	1.95933e-06	1.26981e-07	2.41397e-05
DO223512_1262-01-01TD	blood_lymphoid	ICGC_WXS_CLLE_ES	FALSE	PROF						FALSE	DO223512	0	1262-01-01TD	FALSE		1.59132e-05	1.65763e-07	2.70251e-06	5.54696e-08	2.31301e-05
DO223514_1266-01-04TD	blood_lymphoid	ICGC_WXS_CLLE_ES	FALSE	PROF						FALSE	DO223514	0	1266-01-04TD	FALSE		2.45192e-05	2.55409e-07	2.91088e-06	1.39953e-07	3.14161e-05
DO223515_1268-01-03TD	blood_lymphoid	ICGC_WXS_CLLE_ES	FALSE	PROF						FALSE	DO223515	0	1268-01-03TD	FALSE		1.2656e-05	1.31834e-07	1.30668e-06	8.07534e-08	1.67616e-05
DO223518_1270-01-03TD	blood_lymphoid	ICGC_WXS_CLLE_ES	FALSE	PROF						FALSE	DO223518	0	1270-01-03TD	FALSE		1.17908e-05	1.22821e-07	1.92765e-06	4.43502e-08	1.39417e-05
DO223519_1271-01-04TD	blood_lymphoid	ICGC_WXS_CLLE_ES	FALSE	PROF						FALSE	DO223519	0	1271-01-04TD	FALSE		2.30776e-05	2.40392e-07	2.61693e-06	1.37064e-07	2.75693e-05
DO223521_1277-01-02TD	blood_lymphoid	ICGC_WXS_CLLE_ES	FALSE	PROF						FALSE	DO223521	0	1277-01-02TD	FALSE		8.13629e-06	8.47531e-08	4.91619e-07	6.70633e-08	1.23412e-05
DO223522_1290-01-03TD	blood_lymphoid	ICGC_WXS_CLLE_ES	FALSE	PROF						FALSE	DO223522	0	1290-01-03TD	FALSE		1.8292e-05	1.90541e-07	3.03666e-06	6.67972e-08	2.07235e-05
DO223524_1291-01-05TD	blood_lymphoid	ICGC_WXS_CLLE_ES	FALSE	PROF						FALSE	DO223524	0	1291-01-05TD	FALSE		1.35805e-05	1.41464e-07	2.03777e-06	5.90158e-08	1.77208e-05
DO223525_1294-01-02TD	blood_lymphoid	ICGC_WXS_CLLE_ES	FALSE	PROF						FALSE	DO223525	0	1294-01-02TD	FALSE		4.93049e-06	5.13592e-08	6.17396e-07	2.6749e-08	8.79891e-06
DO223526_1295-01-02TD	blood_lymphoid	ICGC_WXS_CLLE_ES	FALSE	PROF						FALSE	DO223526	0	1295-01-02TD	FALSE		6.9838e-06	7.27479e-08	2.86812e-07	6.34407e-08	1.38655e-05
DO223528_1298-01-04TD	blood_lymphoid	ICGC_WXS_CLLE_ES	FALSE	PROF						FALSE	DO223528	0	1298-01-04TD	FALSE		1.08087e-05	1.12591e-07	1.7983e-06	3.92991e-08	1.74113e-05
DO223529_1307-01-03TD	blood_lymphoid	ICGC_WXS_CLLE_ES	FALSE	PROF						FALSE	DO223529	0	1307-01-03TD	FALSE		2.45299e-05	2.5552e-07	2.5803e-06	1.54443e-07	2.64371e-05
DO223530_1311-01-03TD	blood_lymphoid	ICGC_WXS_CLLE_ES	FALSE	PROF						FALSE	DO223530	0	1311-01-03TD	FALSE		1.22452e-05	1.27555e-07	8.60437e-07	9.56902e-08	1.52731e-05
DO223531_1312-01-04TD	blood_lymphoid	ICGC_WXS_CLLE_ES	FALSE	PROF						FALSE	DO223531	0	1312-01-04TD	FALSE		2.03146e-05	2.1161e-07	1.75096e-06	1.44682e-07	2.05775e-05
DO223532_1313-01-02TD	blood_lymphoid	ICGC_WXS_CLLE_ES	FALSE	PROF						FALSE	DO223532	0	1313-01-02TD	FALSE		1.9969e-05	2.0801e-07	2.41569e-06	1.12024e-07	2.54248e-05
DO223533_1317-01-03TD	blood_lymphoid	ICGC_WXS_CLLE_ES	FALSE	PROF						FALSE	DO223533	0	1317-01-03TD	FALSE		1.18323e-05	1.23253e-07	7.78431e-07	9.47667e-08	1.86075e-05
DO223534_1326-01-03TD	blood_lymphoid	ICGC_WXS_CLLE_ES	FALSE	PROF						FALSE	DO223534	0	1326-01-03TD	FALSE		1.39007e-05	1.44799e-07	1.26291e-06	9.61851e-08	2.01917e-05
DO223535_1327-01-03TD	blood_lymphoid	ICGC_WXS_CLLE_ES	FALSE	PROF						FALSE	DO223535	0	1327-01-03TD	FALSE		1.64146e-05	1.70986e-07	1.92407e-06	9.47646e-08	2.03091e-05
DO223536_1328-01-01TD	blood_lymphoid	ICGC_WXS_CLLE_ES	FALSE	PROF						FALSE	DO223536	0	1328-01-01TD	FALSE		1.52839e-05	1.59207e-07	1.97142e-06	8.04154e-08	1.46181e-05
DO223537_1345-01-03TD	blood_lymphoid	ICGC_WXS_CLLE_ES	FALSE	PROF						FALSE	DO223537	0	1345-01-03TD	FALSE		1.25609e-05	1.30843e-07	2.14096e-06	4.34464e-08	1.43408e-05
DO223538_1346-01-03TD	blood_lymphoid	ICGC_WXS_CLLE_ES	FALSE	PROF						FALSE	DO223538	0	1346-01-03TD	FALSE		2.15472e-05	2.2445e-07	1.95576e-06	1.49175e-07	2.64869e-05
DO223539_1444-01-02TD	blood_lymphoid	ICGC_WXS_CLLE_ES	FALSE	PROF						FALSE	DO223539	0	1444-01-02TD	FALSE		9.25084e-06	9.63629e-08	7.7486e-07	6.6863e-08	1.10247e-05
DO223541_1468-01-1TD	blood_lymphoid	ICGC_WXS_CLLE_ES	FALSE	PROF						FALSE	DO223541	0	1468-01-1TD	FALSE		1.56437e-05	1.62955e-07	1.59706e-06	1.00603e-07	1.7431e-05
DO223542_1471-01-3TD	blood_lymphoid	ICGC_WXS_CLLE_ES	FALSE	PROF						FALSE	DO223542	0	1471-01-3TD	FALSE		3.67334e-05	3.82639e-07	4.09476e-06	2.21243e-07	4.7734e-05
DO223543_1472-01-2TD	blood_lymphoid	ICGC_WXS_CLLE_ES	FALSE	PROF						FALSE	DO223543	0	1472-01-2TD	FALSE		2.19433e-05	2.28576e-07	2.37906e-06	1.35076e-07	2.56014e-05
DO223544_1481-01-1TD	blood_lymphoid	ICGC_WXS_CLLE_ES	FALSE	PROF						FALSE	DO223544	0	1481-01-1TD	FALSE		9.16182e-06	9.54356e-08	9.47979e-07	5.83685e-08	1.34842e-05
DO223545_1484-01-3TD	blood_lymphoid	ICGC_WXS_CLLE_ES	FALSE	PROF						FALSE	DO223545	0	1484-01-3TD	FALSE		1.11546e-05	1.16193e-07	1.75096e-06	4.51166e-08	1.08311e-05
DO223546_1489-01-3TD	blood_lymphoid	ICGC_WXS_CLLE_ES	FALSE	PROF						FALSE	DO223546	0	1489-01-3TD	FALSE		1.97854e-05	2.06098e-07	3.47737e-06	6.38688e-08	2.24499e-05
DO223548_1491-01-1TD	blood_lymphoid	ICGC_WXS_CLLE_ES	FALSE	PROF						FALSE	DO223548	0	1491-01-1TD	FALSE		1.8636e-05	1.94124e-07	2.45095e-06	9.60016e-08	2.19237e-05
DO223550_1564-01-03TD	blood_lymphoid	ICGC_WXS_CLLE_ES	FALSE	PROF						FALSE	DO223550	0	1564-01-03TD	FALSE		1.22529e-05	1.27634e-07	1.26648e-06	7.8119e-08	1.84054e-05
DO223551_1565-01-03TD	blood_lymphoid	ICGC_WXS_CLLE_ES	FALSE	PROF						FALSE	DO223551	0	1565-01-03TD	FALSE		2.21557e-05	2.30788e-07	3.07686e-06	1.07046e-07	2.63921e-05
DO223552_1566-01-03TD	blood_lymphoid	ICGC_WXS_CLLE_ES	FALSE	PROF						FALSE	DO223552	0	1566-01-03TD	FALSE		1.92187e-05	2.00195e-07	2.74271e-06	8.96507e-08	2.42709e-05
DO223553_1567-01-03TD	blood_lymphoid	ICGC_WXS_CLLE_ES	FALSE	PROF						FALSE	DO223553	0	1567-01-03TD	FALSE		7.26052e-06	7.56305e-08	9.47979e-07	3.77023e-08	1.05153e-05
DO223554_1568-01-03TD	blood_lymphoid	ICGC_WXS_CLLE_ES	FALSE	PROF						FALSE	DO223554	0	1568-01-03TD	FALSE		2.27907e-05	2.37403e-07	3.39179e-06	1.00256e-07	2.4455e-05
DO223555_1581-01-01TD	blood_lymphoid	ICGC_WXS_CLLE_ES	FALSE	PROF						FALSE	DO223555	0	1581-01-01TD	FALSE		1.83741e-05	1.91397e-07	2.24257e-06	1.02215e-07	2.10217e-05
DO223557_1587-01-03TD	blood_lymphoid	ICGC_WXS_CLLE_ES	FALSE	PROF						FALSE	DO223557	0	1587-01-03TD	FALSE		1.1693e-05	1.21802e-07	1.47129e-06	6.31292e-08	1.25736e-05
DO223566_011-0029-01TD	blood_lymphoid	ICGC_WXS_CLLE_ES	FALSE	PROF						FALSE	DO223566	0	011-0029-01TD	FALSE		7.73829e-06	8.06072e-08	1.26648e-06	2.90475e-08	1.02374e-05
DO223567_055-03-2TD	blood_lymphoid	ICGC_WXS_CLLE_ES	FALSE	PROF						FALSE	DO223567	0	055-03-2TD	FALSE		1.75277e-05	1.82581e-07	1.92407e-06	1.06863e-07	2.4433e-05
DO223568_116-1889-01TD	blood_lymphoid	ICGC_WXS_CLLE_ES	FALSE	PROF						FALSE	DO223568	0	116-1889-01TD	FALSE		6.1387e-06	6.39448e-08	8.60437e-07	2.93147e-08	9.14908e-06
DO223569_135-05-01TD	blood_lymphoid	ICGC_WXS_CLLE_ES	FALSE	PROF						FALSE	DO223569	0	135-05-01TD	FALSE		8.49089e-06	8.84467e-08	1.10901e-06	4.40742e-08	8.81044e-06
DO223570_160-01-5TD	blood_lymphoid	ICGC_WXS_CLLE_ES	FALSE	PROF						FALSE	DO223570	0	160-01-5TD	FALSE		1.30279e-05	1.35707e-07	1.43603e-06	7.91718e-08	1.83267e-05
DO223571_314-05-01TD	blood_lymphoid	ICGC_WXS_CLLE_ES	FALSE	PROF						FALSE	DO223571	0	314-05-01TD	FALSE		1.81075e-05	1.8862e-07	2.04491e-06	1.07912e-07	2.06458e-05
DO223572_317-05-01TD	blood_lymphoid	ICGC_WXS_CLLE_ES	FALSE	PROF						FALSE	DO223572	0	317-05-01TD	FALSE		1.26922e-05	1.32211e-07	1.32233e-06	8.04664e-08	1.48268e-05
DO223573_329-05-01TD	blood_lymphoid	ICGC_WXS_CLLE_ES	FALSE	PROF						FALSE	DO223573	0	329-05-01TD	FALSE		4.93332e-05	5.13888e-07	6.01747e-06	2.74602e-07	5.0569e-05
DO223574_382-09-01TD	blood_lymphoid	ICGC_WXS_CLLE_ES	FALSE	PROF						FALSE	DO223574	0	382-09-01TD	FALSE		1.2341e-05	1.28552e-07	1.39226e-06	7.36085e-08	1.5622e-05
DO223575_383-01-1TD	blood_lymphoid	ICGC_WXS_CLLE_ES	FALSE	PROF						FALSE	DO223575	0	383-01-1TD	FALSE		8.84017e-06	9.20851e-08	2.86812e-07	8.36187e-08	7.82362e-06
DO223576_571-01-9TD	blood_lymphoid	ICGC_WXS_CLLE_ES	FALSE	PROF						FALSE	DO223576	0	571-01-9TD	FALSE		7.15294e-06	7.45098e-08	6.61167e-07	4.9003e-08	7.11846e-06
DO223577_756-01-1TD	blood_lymphoid	ICGC_WXS_CLLE_ES	FALSE	PROF						FALSE	DO223577	0	756-01-1TD	FALSE		1.50225e-05	1.56484e-07	1.95576e-06	7.82545e-08	1.2745e-05
DO223578_757-01-9TD	blood_lymphoid	ICGC_WXS_CLLE_ES	FALSE	PROF						FALSE	DO223578	0	757-01-9TD	FALSE		1.99121e-05	2.07418e-07	2.66231e-06	1.00684e-07	1.66181e-05
DO223579_770-01-13TD	blood_lymphoid	ICGC_WXS_CLLE_ES	FALSE	PROF						FALSE	DO223579	0	770-01-13TD	FALSE		1.29901e-05	1.35313e-07	1.92407e-06	5.75408e-08	1.05454e-05
DO223580_813-01-9TD	blood_lymphoid	ICGC_WXS_CLLE_ES	FALSE	PROF						FALSE	DO223580	0	813-01-9TD	FALSE		9.80788e-06	1.02165e-07	4.88048e-07	8.53879e-08	9.53874e-06
DO223581_826-08-01TD	blood_lymphoid	ICGC_WXS_CLLE_ES	FALSE	PROF						FALSE	DO223581	0	826-08-01TD	FALSE		1.74706e-05	1.81986e-07	1.10901e-06	1.4168e-07	2.18076e-05
DO223582_898-05-01TD	blood_lymphoid	ICGC_WXS_CLLE_ES	FALSE	PROF						FALSE	DO223582	0	898-05-01TD	FALSE		4.7336e-06	4.93083e-08	6.61167e-07	2.27058e-08	5.93718e-06
DO223583_1079-02-01TD	blood_lymphoid	ICGC_WXS_CLLE_ES	FALSE	PROF						FALSE	DO223583	0	1079-02-01TD	FALSE		1.26229e-05	1.31489e-07	1.80187e-06	5.88638e-08	1.32379e-05
DO223585_1364-01-01TD	blood_lymphoid	ICGC_WXS_CLLE_ES	FALSE	PROF						FALSE	DO223585	0	1364-01-01TD	FALSE		1.25932e-05	1.31179e-07	8.60437e-07	9.94719e-08	1.51161e-05
DO223586_1365-01-01TD	blood_lymphoid	ICGC_WXS_CLLE_ES	FALSE	PROF						FALSE	DO223586	0	1365-01-01TD	FALSE		8.40591e-06	8.75615e-08	7.78431e-07	5.75237e-08	1.15564e-05
DO223587_1380-01-01TD	blood_lymphoid	ICGC_WXS_CLLE_ES	FALSE	PROF						FALSE	DO223587	0	1380-01-01TD	FALSE		2.42884e-05	2.53004e-07	2.24615e-06	1.66346e-07	2.94261e-05
DO230492_1263-01-01TD	blood_lymphoid	ICGC_WXS_CLLE_ES	FALSE	PROF						FALSE	DO230492	0	1263-01-01TD	FALSE		1.19702e-05	1.24689e-07	1.14921e-06	8.01447e-08	1.35104e-05
DO230493_1309-01-04TD	blood_lymphoid	ICGC_WXS_CLLE_ES	FALSE	PROF						FALSE	DO230493	0	1309-01-04TD	FALSE		1.03542e-05	1.07856e-07	1.43603e-06	5.01094e-08	1.61857e-05
DO51968_291-03-4TD	blood_lymphoid	ICGC_WXS_CLLE_ES	FALSE	PROF						FALSE	DO51968	0	291-03-4TD	FALSE		2.51471e-05	2.61949e-07	2.9194e-06	1.46408e-07	2.36493e-05
DO51969_353-03-2TD	blood_lymphoid	ICGC_WXS_CLLE_ES	FALSE	PROF						FALSE	DO51969	0	353-03-2TD	FALSE		6.31993e-06	6.58326e-08	5.73625e-07	4.37547e-08	5.14471e-06
DO51970_447-03-02TD	blood_lymphoid	ICGC_WXS_CLLE_ES	FALSE	PROF						FALSE	DO51970	0	447-03-02TD	FALSE		1.00909e-05	1.05113e-07	1.59706e-06	4.02459e-08	9.68252e-06
DO51971_510-03-01TD	blood_lymphoid	ICGC_WXS_CLLE_ES	FALSE	PROF						FALSE	DO51971	0	510-03-01TD	FALSE		3.18446e-05	3.31714e-07	4.82645e-06	1.36291e-07	2.86395e-05
DO51972_561-01-3TD	blood_lymphoid	ICGC_WXS_CLLE_ES	FALSE	PROF						FALSE	DO51972	0	561-01-3TD	FALSE		3.18241e-05	3.31501e-07	2.32458e-06	2.44845e-07	2.64895e-05
DO51973_565-01-4TD	blood_lymphoid	ICGC_WXS_CLLE_ES	FALSE	PROF						FALSE	DO51973	0	565-01-4TD	FALSE		1.54859e-05	1.61311e-07	7.7486e-07	1.34635e-07	1.30465e-05
DO51974_569-01-4TD	blood_lymphoid	ICGC_WXS_CLLE_ES	FALSE	PROF						FALSE	DO51974	0	569-01-4TD	FALSE		2.55404e-05	2.66046e-07	2.70054e-06	1.60198e-07	2.42842e-05
DO51975_578-01-2TD	blood_lymphoid	ICGC_WXS_CLLE_ES	FALSE	PROF						FALSE	DO51975	0	578-01-2TD	FALSE		9.4337e-06	9.82677e-08	9.76095e-07	6.01013e-08	8.18908e-06
DO51976_580-01-5TD	blood_lymphoid	ICGC_WXS_CLLE_ES	FALSE	PROF						FALSE	DO51976	0	580-01-5TD	FALSE		4.89238e-06	5.09622e-08	4.88048e-07	3.19585e-08	4.87336e-06
DO51977_584-01-1TD	blood_lymphoid	ICGC_WXS_CLLE_ES	FALSE	PROF						FALSE	DO51977	0	584-01-1TD	FALSE		9.18631e-06	9.56907e-08	8.18631e-07	6.42585e-08	9.28267e-06
DO51978_585-01-4TD	blood_lymphoid	ICGC_WXS_CLLE_ES	FALSE	PROF						FALSE	DO51978	0	585-01-4TD	FALSE		1.66432e-05	1.73366e-07	1.31382e-06	1.23781e-07	1.55294e-05
DO51979_588-01-10TD	blood_lymphoid	ICGC_WXS_CLLE_ES	FALSE	PROF						FALSE	DO51979	0	588-01-10TD	FALSE		1.48085e-05	1.54255e-07	1.39583e-06	1.00273e-07	1.32909e-05
DO51980_596-01-1TD	blood_lymphoid	ICGC_WXS_CLLE_ES	FALSE	PROF						FALSE	DO51980	0	596-01-1TD	FALSE		2.14592e-05	2.23533e-07	2.56959e-06	1.2153e-07	2.01576e-05
DO51981_626-02-2TD	blood_lymphoid	ICGC_WXS_CLLE_ES	FALSE	PROF						FALSE	DO51981	0	626-02-2TD	FALSE		7.52962e-06	7.84335e-08	4.88048e-07	6.06242e-08	7.94323e-06
DO51982_751-02-4TD	blood_lymphoid	ICGC_WXS_CLLE_ES	FALSE	PROF						FALSE	DO51982	0	751-02-4TD	FALSE		1.10912e-05	1.15534e-07	1.06524e-06	7.42418e-08	9.90552e-06
DO51983_754-01-8TD	blood_lymphoid	ICGC_WXS_CLLE_ES	FALSE	PROF						FALSE	DO51983	0	754-01-8TD	FALSE		2.07544e-05	2.16192e-07	2.25466e-06	1.27563e-07	1.8385e-05
DO51984_763-01-11TD	blood_lymphoid	ICGC_WXS_CLLE_ES	FALSE	PROF						FALSE	DO51984	0	763-01-11TD	FALSE		1.20455e-05	1.25473e-07	9.47979e-07	8.97124e-08	1.07451e-05
DO51985_766-01-1TD	blood_lymphoid	ICGC_WXS_CLLE_ES	FALSE	PROF						FALSE	DO51985	0	766-01-1TD	FALSE		1.1876e-05	1.23708e-07	1.30668e-06	7.22748e-08	1.16192e-05
DO51986_767-01-6TD	blood_lymphoid	ICGC_WXS_CLLE_ES	FALSE	PROF						FALSE	DO51986	0	767-01-6TD	FALSE		8.00003e-06	8.33336e-08	7.7486e-07	5.32673e-08	9.34462e-06
DO51987_769-01-5TD	blood_lymphoid	ICGC_WXS_CLLE_ES	FALSE	PROF						FALSE	DO51987	0	769-01-5TD	FALSE		1.3083e-05	1.36281e-07	2.73419e-06	2.33281e-08	1.05857e-05
DO51988_773-01-4TD	blood_lymphoid	ICGC_WXS_CLLE_ES	FALSE	PROF						FALSE	DO51988	0	773-01-4TD	FALSE		1.34544e-05	1.4015e-07	1.39226e-06	8.57108e-08	1.19406e-05
DO51990_778-01-4TD	blood_lymphoid	ICGC_WXS_CLLE_ES	FALSE	PROF						FALSE	DO51990	0	778-01-4TD	FALSE		2.28978e-05	2.38518e-07	2.57673e-06	1.36857e-07	1.9441e-05
DO51991_780-01-1TD	blood_lymphoid	ICGC_WXS_CLLE_ES	FALSE	PROF						FALSE	DO51991	0	780-01-1TD	FALSE		9.45201e-06	9.84585e-08	7.7486e-07	6.90497e-08	9.82443e-06
DO51993_784-01-12TD	blood_lymphoid	ICGC_WXS_CLLE_ES	FALSE	PROF						FALSE	DO51993	0	784-01-12TD	FALSE		1.41323e-05	1.47211e-07	1.7581e-06	7.71727e-08	1.38393e-05
DO51994_788-01-6TD	blood_lymphoid	ICGC_WXS_CLLE_ES	FALSE	PROF						FALSE	DO51994	0	788-01-6TD	FALSE		1.0698e-05	1.11437e-07	1.30668e-06	5.94703e-08	9.1691e-06
DO51995_794-01-9TD	blood_lymphoid	ICGC_WXS_CLLE_ES	FALSE	PROF						FALSE	DO51995	0	794-01-9TD	FALSE		1.35879e-05	1.41541e-07	1.72284e-06	7.27888e-08	1.27338e-05
DO51996_800-01-3TD	blood_lymphoid	ICGC_WXS_CLLE_ES	FALSE	PROF						FALSE	DO51996	0	800-01-3TD	FALSE		1.18864e-05	1.23817e-07	1.59349e-06	5.99176e-08	1.10335e-05
DO51998_801-01-7TD	blood_lymphoid	ICGC_WXS_CLLE_ES	FALSE	PROF						FALSE	DO51998	0	801-01-7TD	FALSE		1.18498e-05	1.23435e-07	9.9175e-07	8.56823e-08	1.16771e-05
DO52002_811-01-1TD	blood_lymphoid	ICGC_WXS_CLLE_ES	FALSE	PROF						FALSE	DO52002	0	811-01-1TD	FALSE		2.15088e-05	2.2405e-07	2.69893e-06	1.16446e-07	2.0703e-05
DO52003_814-01-10TD	blood_lymphoid	ICGC_WXS_CLLE_ES	FALSE	PROF						FALSE	DO52003	0	814-01-10TD	FALSE		1.3131e-05	1.36781e-07	2.24615e-06	4.50694e-08	1.15114e-05
DO52006_821-01-12TD	blood_lymphoid	ICGC_WXS_CLLE_ES	FALSE	PROF						FALSE	DO52006	0	821-01-12TD	FALSE		1.55244e-05	1.61712e-07	2.28635e-06	6.93369e-08	1.33471e-05
DO52007_841-01-9TD	blood_lymphoid	ICGC_WXS_CLLE_ES	FALSE	PROF						FALSE	DO52007	0	841-01-9TD	FALSE		1.57213e-05	1.63763e-07	1.10901e-06	1.22666e-07	1.81094e-05
DO52008_842-01-8TD	blood_lymphoid	ICGC_WXS_CLLE_ES	FALSE	PROF						FALSE	DO52008	0	842-01-8TD	FALSE		1.08228e-05	1.12738e-07	1.46771e-06	5.38259e-08	1.17599e-05
DO52013_857-01-3TD	blood_lymphoid	ICGC_WXS_CLLE_ES	FALSE	PROF						FALSE	DO52013	0	857-01-3TD	FALSE		2.12427e-05	2.21278e-07	2.85997e-06	1.06552e-07	1.82995e-05
DO52014_859-01-3TD	blood_lymphoid	ICGC_WXS_CLLE_ES	FALSE	PROF						FALSE	DO52014	0	859-01-3TD	FALSE		1.70301e-05	1.77397e-07	2.08511e-06	9.44532e-08	1.52254e-05
DO52016_878-01-5TD	blood_lymphoid	ICGC_WXS_CLLE_ES	FALSE	PROF						FALSE	DO52016	0	878-01-5TD	FALSE		1.768e-05	1.84167e-07	2.41569e-06	8.71441e-08	1.57267e-05
DO52697_885-01-7TD	blood_lymphoid	ICGC_WXS_CLLE_ES	FALSE	PROF						FALSE	DO52697	0	885-01-7TD	FALSE		1.54646e-05	1.6109e-07	1.7983e-06	8.99071e-08	1.30461e-05
DO6354_005-0015-01TD	blood_lymphoid	ICGC_WXS_CLLE_ES	FALSE	PROF						FALSE	DO6354	0	005-0015-01TD	FALSE		1.4989e-06	1.56136e-08	0	1.62924e-08	3.45779e-06
DO6356_007-0020-01TD	blood_lymphoid	ICGC_WXS_CLLE_ES	FALSE	PROF						FALSE	DO6356	0	007-0020-01TD	FALSE		2.72074e-05	2.8341e-07	1.80544e-06	2.17235e-07	2.98119e-05
DO6360_009-0026-02TD	blood_lymphoid	ICGC_WXS_CLLE_ES	FALSE	PROF						FALSE	DO6360	0	009-0026-02TD	FALSE		7.91334e-06	8.24306e-08	1.47129e-06	2.20456e-08	8.78685e-06
DO6370_016-0040-02TD	blood_lymphoid	ICGC_WXS_CLLE_ES	FALSE	PROF						FALSE	DO6370	0	016-0040-02TD	FALSE		1.21005e-05	1.26047e-07	9.76095e-07	8.90879e-08	1.09518e-05
DO6372_017-0042-01TD	blood_lymphoid	ICGC_WXS_CLLE_ES	FALSE	PROF						FALSE	DO6372	0	017-0042-01TD	FALSE		1.58129e-05	1.64717e-07	2.61693e-06	5.80995e-08	1.41014e-05
DO6374_018-0046-01TD	blood_lymphoid	ICGC_WXS_CLLE_ES	FALSE	PROF						FALSE	DO6374	0	018-0046-01TD	FALSE		1.37446e-05	1.43173e-07	1.43603e-06	8.69623e-08	1.39964e-05
DO6376_019-0047-01TD	blood_lymphoid	ICGC_WXS_CLLE_ES	FALSE	PROF						FALSE	DO6376	0	019-0047-01TD	FALSE		1.15947e-05	1.20778e-07	9.47979e-07	8.48129e-08	1.13046e-05
DO6378_020-0049-01TD	blood_lymphoid	ICGC_WXS_CLLE_ES	FALSE	PROF						FALSE	DO6378	0	020-0049-01TD	FALSE		5.3108e-06	5.53209e-08	9.76095e-07	1.52872e-08	5.51442e-06
DO6380_022-0053-01TD	blood_lymphoid	ICGC_WXS_CLLE_ES	FALSE	PROF						FALSE	DO6380	0	022-0053-01TD	FALSE		1.55311e-05	1.61782e-07	2.08868e-06	7.80036e-08	1.92875e-05
DO6382_023-0056-01TD	blood_lymphoid	ICGC_WXS_CLLE_ES	FALSE	PROF						FALSE	DO6382	0	023-0056-01TD	FALSE		4.77229e-06	4.97114e-08	8.22202e-07	1.61248e-08	4.31828e-06
DO6390_027-0063-01TD	blood_lymphoid	ICGC_WXS_CLLE_ES	FALSE	PROF						FALSE	DO6390	0	027-0063-01TD	FALSE		8.66964e-06	9.03088e-08	4.88048e-07	7.30158e-08	8.15013e-06
DO6392_029-0065-01TD	blood_lymphoid	ICGC_WXS_CLLE_ES	FALSE	PROF						FALSE	DO6392	0	029-0065-01TD	FALSE		7.98519e-06	8.3179e-08	5.73625e-07	6.18553e-08	7.442e-06
DO6394_030-0066-01TD	blood_lymphoid	ICGC_WXS_CLLE_ES	FALSE	PROF						FALSE	DO6394	0	030-0066-01TD	FALSE		8.48348e-06	8.83696e-08	2.86812e-07	7.97417e-08	1.11059e-05
DO6396_032-0069-01TD	blood_lymphoid	ICGC_WXS_CLLE_ES	FALSE	PROF						FALSE	DO6396	0	032-0069-01TD	FALSE		1.37357e-05	1.4308e-07	2.08511e-06	5.86441e-08	1.42219e-05
DO6402_039-0076-01TD	blood_lymphoid	ICGC_WXS_CLLE_ES	FALSE	PROF						FALSE	DO6402	0	039-0076-01TD	FALSE		1.22294e-05	1.27389e-07	6.61167e-07	1.04181e-07	1.29126e-05
DO6404_040-0088-01TD	blood_lymphoid	ICGC_WXS_CLLE_ES	FALSE	PROF						FALSE	DO6404	0	040-0088-01TD	FALSE		1.2681e-05	1.32094e-07	1.6353e-06	6.67373e-08	1.138e-05
DO6406_041-0090-01TD	blood_lymphoid	ICGC_WXS_CLLE_ES	FALSE	PROF						FALSE	DO6406	0	041-0090-01TD	FALSE		7.75815e-06	8.08141e-08	4.88048e-07	6.31083e-08	9.66942e-06
DO6408_043-0094-01TD	blood_lymphoid	ICGC_WXS_CLLE_ES	FALSE	PROF						FALSE	DO6408	0	043-0094-01TD	FALSE		1.32487e-05	1.38007e-07	1.10901e-06	9.57893e-08	1.39687e-05
DO6410_044-0092-01TD	blood_lymphoid	ICGC_WXS_CLLE_ES	FALSE	PROF						FALSE	DO6410	0	044-0092-01TD	FALSE		1.08934e-05	1.13473e-07	1.63726e-06	4.72209e-08	9.96311e-06
DO6412_045-0082-04TD	blood_lymphoid	ICGC_WXS_CLLE_ES	FALSE	PROF						FALSE	DO6412	0	045-0082-04TD	FALSE		8.6261e-06	8.98552e-08	1.30668e-06	3.69498e-08	7.50101e-06
DO6416_047-0084-06TD	blood_lymphoid	ICGC_WXS_CLLE_ES	FALSE	PROF						FALSE	DO6416	0	047-0084-06TD	FALSE		2.226e-05	2.31875e-07	2.56959e-06	1.30236e-07	3.06174e-05
DO6418_048-0089-01TD	blood_lymphoid	ICGC_WXS_CLLE_ES	FALSE	PROF						FALSE	DO6418	0	048-0089-01TD	FALSE		5.28949e-06	5.50988e-08	4.88048e-07	3.6275e-08	5.27111e-06
DO6420_049-0086-01TD	blood_lymphoid	ICGC_WXS_CLLE_ES	FALSE	PROF						FALSE	DO6420	0	049-0086-01TD	FALSE		7.30726e-06	7.61173e-08	7.7486e-07	4.57372e-08	8.88255e-06
DO6422_051-0099-05TD	blood_lymphoid	ICGC_WXS_CLLE_ES	FALSE	PROF						FALSE	DO6422	0	051-0099-05TD	FALSE		1.31143e-05	1.36607e-07	1.75453e-06	6.62627e-08	1.33101e-05
DO6426_053-0104-02TD	blood_lymphoid	ICGC_WXS_CLLE_ES	FALSE	PROF						FALSE	DO6426	0	053-0104-02TD	FALSE		1.48974e-05	1.55181e-07	2.32815e-06	6.07043e-08	1.72124e-05
DO6430_063-0127-01TD	blood_lymphoid	ICGC_WXS_CLLE_ES	FALSE	PROF						FALSE	DO6430	0	063-0127-01TD	FALSE		6.22261e-06	6.48188e-08	6.61167e-07	3.88907e-08	5.05111e-06
DO6432_064-0128-01TD	blood_lymphoid	ICGC_WXS_CLLE_ES	FALSE	PROF						FALSE	DO6432	0	064-0128-01TD	FALSE		1.28676e-05	1.34038e-07	1.31025e-06	8.28981e-08	1.0589e-05
DO6434_082-02-1TD	blood_lymphoid	ICGC_WXS_CLLE_ES	FALSE	PROF						FALSE	DO6434	0	082-02-1TD	FALSE		4.88496e-06	5.0885e-08	2.86812e-07	4.06272e-08	5.78854e-06
DO6436_083-01-2TD	blood_lymphoid	ICGC_WXS_CLLE_ES	FALSE	PROF						FALSE	DO6436	0	083-01-2TD	FALSE		9.35798e-06	9.7479e-08	6.17396e-07	7.48739e-08	8.12121e-06
DO6438_090-02-1TD	blood_lymphoid	ICGC_WXS_CLLE_ES	FALSE	PROF						FALSE	DO6438	0	090-02-1TD	FALSE		1.45115e-05	1.51161e-07	1.23479e-06	1.04047e-07	1.28856e-05
DO6440_100-02-2TD	blood_lymphoid	ICGC_WXS_CLLE_ES	FALSE	PROF						FALSE	DO6440	0	100-02-2TD	FALSE		7.21955e-06	7.52036e-08	8.22202e-07	4.27254e-08	6.60265e-06
DO6444_110-0218-04TD	blood_lymphoid	ICGC_WXS_CLLE_ES	FALSE	PROF						FALSE	DO6444	0	110-0218-04TD	FALSE		1.22314e-05	1.2741e-07	1.10544e-06	8.48869e-08	1.15677e-05
DO6446_117-01-1TD	blood_lymphoid	ICGC_WXS_CLLE_ES	FALSE	PROF						FALSE	DO6446	0	117-01-1TD	FALSE		1.33986e-05	1.39569e-07	9.76095e-07	1.03198e-07	1.3727e-05
DO6448_124-01-1TD	blood_lymphoid	ICGC_WXS_CLLE_ES	FALSE	PROF						FALSE	DO6448	0	124-01-1TD	FALSE		1.29477e-05	1.34871e-07	2.50127e-06	3.19846e-08	1.14731e-05
DO6452_131-02-5TD	blood_lymphoid	ICGC_WXS_CLLE_ES	FALSE	PROF						FALSE	DO6452	0	131-02-5TD	FALSE		2.85411e-05	2.97303e-07	3.06478e-06	1.76978e-07	3.71631e-05
DO6454_136-02-3TD	blood_lymphoid	ICGC_WXS_CLLE_ES	FALSE	PROF						FALSE	DO6454	0	136-02-3TD	FALSE		1.52498e-05	1.58852e-07	2.41569e-06	6.0729e-08	1.36022e-05
DO6458_144-01-1TD	blood_lymphoid	ICGC_WXS_CLLE_ES	FALSE	PROF						FALSE	DO6458	0	144-01-1TD	FALSE		6.63894e-06	6.91556e-08	9.79667e-07	2.95682e-08	6.8402e-06
DO6460_146-01-5TD	blood_lymphoid	ICGC_WXS_CLLE_ES	FALSE	PROF						FALSE	DO6460	0	146-01-5TD	FALSE		1.01282e-05	1.05502e-07	1.30668e-06	5.32765e-08	9.45635e-06
DO6462_147-02-3TD	blood_lymphoid	ICGC_WXS_CLLE_ES	FALSE	PROF						FALSE	DO6462	0	147-02-3TD	FALSE		1.16127e-05	1.20966e-07	1.75453e-06	4.99416e-08	1.61961e-05
DO6464_152-01-4TD	blood_lymphoid	ICGC_WXS_CLLE_ES	FALSE	PROF						FALSE	DO6464	0	152-01-4TD	FALSE		4.37035e-06	4.55245e-08	8.18631e-07	1.19112e-08	4.58347e-06
DO6466_155-01-1TD	blood_lymphoid	ICGC_WXS_CLLE_ES	FALSE	PROF						FALSE	DO6466	0	155-01-1TD	FALSE		9.58639e-06	9.98582e-08	1.46414e-06	4.05415e-08	8.23665e-06
DO6468_156-01-1TD	blood_lymphoid	ICGC_WXS_CLLE_ES	FALSE	PROF						FALSE	DO6468	0	156-01-1TD	FALSE		1.09838e-05	1.14414e-07	7.7486e-07	8.56991e-08	1.10683e-05
DO6470_157-01-1TD	blood_lymphoid	ICGC_WXS_CLLE_ES	FALSE	PROF						FALSE	DO6470	0	157-01-1TD	FALSE		1.06466e-05	1.10902e-07	1.34848e-06	5.70941e-08	1.11732e-05
DO6472_159-01-1TD	blood_lymphoid	ICGC_WXS_CLLE_ES	FALSE	PROF						FALSE	DO6472	0	159-01-1TD	FALSE		2.01487e-05	2.09882e-07	1.75096e-06	1.42879e-07	2.20888e-05
DO6474_166-01-4TD	blood_lymphoid	ICGC_WXS_CLLE_ES	FALSE	PROF						FALSE	DO6474	0	166-01-4TD	FALSE		2.53165e-06	2.63714e-08	4.91619e-07	6.14324e-09	2.04399e-06
DO6478_170-01-3TD	blood_lymphoid	ICGC_WXS_CLLE_ES	FALSE	PROF						FALSE	DO6478	0	170-01-3TD	FALSE		1.80826e-05	1.88361e-07	2.65516e-06	8.11085e-08	1.56851e-05
DO6482_172-01-1TD	blood_lymphoid	ICGC_WXS_CLLE_ES	FALSE	PROF						FALSE	DO6482	0	172-01-1TD	FALSE		2.37571e-05	2.47469e-07	2.73062e-06	1.39506e-07	2.0734e-05
DO6484_173-01-3TD	blood_lymphoid	ICGC_WXS_CLLE_ES	FALSE	PROF						FALSE	DO6484	0	173-01-3TD	FALSE		4.55468e-06	4.74446e-08	8.18631e-07	1.39147e-08	5.30647e-06
DO6488_175-01-3TD	blood_lymphoid	ICGC_WXS_CLLE_ES	FALSE	PROF						FALSE	DO6488	0	175-01-3TD	FALSE		1.47093e-05	1.53222e-07	9.83238e-07	1.17134e-07	1.18827e-05
DO6490_180-02-1TD	blood_lymphoid	ICGC_WXS_CLLE_ES	FALSE	PROF						FALSE	DO6490	0	180-02-1TD	FALSE		9.56183e-06	9.96024e-08	8.18631e-07	6.83403e-08	1.24418e-05
DO6492_181-01-3TD	blood_lymphoid	ICGC_WXS_CLLE_ES	FALSE	PROF						FALSE	DO6492	0	181-01-3TD	FALSE		1.14401e-05	1.19168e-07	1.59706e-06	5.49113e-08	1.1589e-05
DO6494_182-01-4TD	blood_lymphoid	ICGC_WXS_CLLE_ES	FALSE	PROF						FALSE	DO6494	0	182-01-4TD	FALSE		1.81349e-05	1.88905e-07	1.96588e-06	1.11645e-07	1.76355e-05
DO6496_184-01-4TD	blood_lymphoid	ICGC_WXS_CLLE_ES	FALSE	PROF						FALSE	DO6496	0	184-01-4TD	FALSE		1.51965e-05	1.58297e-07	2.77439e-06	4.45536e-08	1.27387e-05
DO6498_185-01-6TD	blood_lymphoid	ICGC_WXS_CLLE_ES	FALSE	PROF						FALSE	DO6498	0	185-01-6TD	FALSE		1.54609e-05	1.61051e-07	2.12888e-06	7.54936e-08	1.67998e-05
DO6501_186-01-6TD	blood_lymphoid	ICGC_WXS_CLLE_ES	FALSE	PROF						FALSE	DO6501	0	186-01-6TD	FALSE		1.61246e-05	1.67965e-07	1.54972e-06	1.07889e-07	1.64659e-05
DO6504_188-01-2TD	blood_lymphoid	ICGC_WXS_CLLE_ES	FALSE	PROF						FALSE	DO6504	0	188-01-2TD	FALSE		1.04675e-05	1.09037e-07	1.72284e-06	3.88712e-08	1.03378e-05
DO6507_189-01-1TD	blood_lymphoid	ICGC_WXS_CLLE_ES	FALSE	PROF						FALSE	DO6507	0	189-01-1TD	FALSE		2.24637e-05	2.33997e-07	1.39226e-06	1.83638e-07	2.27384e-05
DO6510_191-01-3TD	blood_lymphoid	ICGC_WXS_CLLE_ES	FALSE	PROF						FALSE	DO6510	0	191-01-3TD	FALSE		9.49451e-06	9.89012e-08	0	1.03201e-07	1.12145e-05
DO6513_192-01-4TD	blood_lymphoid	ICGC_WXS_CLLE_ES	FALSE	PROF						FALSE	DO6513	0	192-01-4TD	FALSE		6.0192e-06	6.27e-08	3.30583e-07	5.10529e-08	6.52393e-06
DO6519_194-01-2TD	blood_lymphoid	ICGC_WXS_CLLE_ES	FALSE	PROF						FALSE	DO6519	0	194-01-2TD	FALSE		2.96414e-05	3.08764e-07	1.95933e-06	2.37e-07	2.81556e-05
DO6522_195-01-5TD	blood_lymphoid	ICGC_WXS_CLLE_ES	FALSE	PROF						FALSE	DO6522	0	195-01-5TD	FALSE		2.7039e-05	2.81656e-07	4.1421e-06	1.1381e-07	2.70336e-05
DO6525_197-01-3TD	blood_lymphoid	ICGC_WXS_CLLE_ES	FALSE	PROF						FALSE	DO6525	0	197-01-3TD	FALSE		2.42949e-05	2.53072e-07	1.63726e-06	1.9289e-07	2.35847e-05
DO6528_264-01-7TD	blood_lymphoid	ICGC_WXS_CLLE_ES	FALSE	PROF						FALSE	DO6528	0	264-01-7TD	FALSE		2.18264e-05	2.27359e-07	2.6205e-06	1.23309e-07	1.88495e-05
DO6531_267-01-6TD	blood_lymphoid	ICGC_WXS_CLLE_ES	FALSE	PROF						FALSE	DO6531	0	267-01-6TD	FALSE		1.73261e-05	1.8048e-07	1.92407e-06	1.04672e-07	1.72282e-05
DO6534_270-01-2TD	blood_lymphoid	ICGC_WXS_CLLE_ES	FALSE	PROF						FALSE	DO6534	0	270-01-2TD	FALSE		2.32113e-05	2.41784e-07	3.03309e-06	1.20423e-07	2.11152e-05
DO6537_273-01-5TD	blood_lymphoid	ICGC_WXS_CLLE_ES	FALSE	PROF						FALSE	DO6537	0	273-01-5TD	FALSE		2.10014e-05	2.18764e-07	3.7188e-06	6.65889e-08	2.12055e-05
DO6540_274-01-3TD	blood_lymphoid	ICGC_WXS_CLLE_ES	FALSE	PROF						FALSE	DO6540	0	274-01-3TD	FALSE		1.77943e-05	1.85357e-07	2.86812e-07	1.80946e-07	1.76754e-05
DO6543_275-01-2TD	blood_lymphoid	ICGC_WXS_CLLE_ES	FALSE	PROF						FALSE	DO6543	0	275-01-2TD	FALSE		8.4435e-06	8.79531e-08	2.86812e-07	7.93071e-08	1.49515e-05
DO6546_276-01-4TD	blood_lymphoid	ICGC_WXS_CLLE_ES	FALSE	PROF						FALSE	DO6546	0	276-01-4TD	FALSE		1.18871e-05	1.23824e-07	1.26648e-06	7.41434e-08	1.28519e-05
DO6555_280-01-4TD	blood_lymphoid	ICGC_WXS_CLLE_ES	FALSE	PROF						FALSE	DO6555	0	280-01-4TD	FALSE		2.22799e-05	2.32082e-07	1.76661e-06	1.65364e-07	2.59571e-05
DO6558_282-01-12TD	blood_lymphoid	ICGC_WXS_CLLE_ES	FALSE	PROF						FALSE	DO6558	0	282-01-12TD	FALSE		1.267e-05	1.3198e-07	1.76661e-06	6.09088e-08	1.21743e-05
DO6561_290-1950-01TD	blood_lymphoid	ICGC_WXS_CLLE_ES	FALSE	PROF						FALSE	DO6561	0	290-1950-01TD	FALSE		1.66272e-05	1.732e-07	2.24615e-06	8.30723e-08	1.486e-05
DO6568_297-01-1TD	blood_lymphoid	ICGC_WXS_CLLE_ES	FALSE	PROF						FALSE	DO6568	0	297-01-1TD	FALSE		2.10351e-05	2.19115e-07	3.5966e-06	7.22681e-08	2.01731e-05
DO6572_298-01-5TD	blood_lymphoid	ICGC_WXS_CLLE_ES	FALSE	PROF						FALSE	DO6572	0	298-01-5TD	FALSE		1.15871e-05	1.20699e-07	1.6353e-06	5.4847e-08	1.2664e-05
DO6576_305-01-5TD	blood_lymphoid	ICGC_WXS_CLLE_ES	FALSE	PROF						FALSE	DO6576	0	305-01-5TD	FALSE		1.32732e-05	1.38263e-07	1.8401e-06	6.42699e-08	1.32562e-05
DO6590_312-01-5TD	blood_lymphoid	ICGC_WXS_CLLE_ES	FALSE	PROF						FALSE	DO6590	0	312-01-5TD	FALSE		7.10499e-06	7.40103e-08	8.18631e-07	4.16355e-08	6.24074e-06
DO6600_315-01-7TD	blood_lymphoid	ICGC_WXS_CLLE_ES	FALSE	PROF						FALSE	DO6600	0	315-01-7TD	FALSE		1.85421e-05	1.93147e-07	1.92407e-06	1.17889e-07	1.78131e-05
DO6605_316-01-8TD	blood_lymphoid	ICGC_WXS_CLLE_ES	FALSE	PROF						FALSE	DO6605	0	316-01-8TD	FALSE		2.61564e-05	2.72463e-07	3.96184e-06	1.12055e-07	2.32836e-05
DO6620_322-01-1TD	blood_lymphoid	ICGC_WXS_CLLE_ES	FALSE	PROF						FALSE	DO6620	0	322-01-1TD	FALSE		1.19623e-05	1.24607e-07	1.7983e-06	5.18381e-08	1.43476e-05
DO6625_323-01-1TD	blood_lymphoid	ICGC_WXS_CLLE_ES	FALSE	PROF						FALSE	DO6625	0	323-01-1TD	FALSE		1.27323e-05	1.32628e-07	2.16712e-06	4.41725e-08	1.26711e-05
DO6630_324-01-1TD	blood_lymphoid	ICGC_WXS_CLLE_ES	FALSE	PROF						FALSE	DO6630	0	324-01-1TD	FALSE		1.24283e-05	1.29461e-07	3.30583e-07	1.20717e-07	1.16719e-05
DO6635_325-01-1TD	blood_lymphoid	ICGC_WXS_CLLE_ES	FALSE	PROF						FALSE	DO6635	0	325-01-1TD	FALSE		1.12354e-05	1.17035e-07	3.30583e-07	1.0775e-07	1.44702e-05
DO6640_326-01-1TD	blood_lymphoid	ICGC_WXS_CLLE_ES	FALSE	PROF						FALSE	DO6640	0	326-01-1TD	FALSE		2.04919e-05	2.13457e-07	1.47486e-06	1.58613e-07	1.84296e-05
DO6645_330-01-1TD	blood_lymphoid	ICGC_WXS_CLLE_ES	FALSE	PROF						FALSE	DO6645	0	330-01-1TD	FALSE		1.02787e-05	1.0707e-07	1.06167e-06	6.5565e-08	9.33413e-06
DO6650_331-01-3TD	blood_lymphoid	ICGC_WXS_CLLE_ES	FALSE	PROF						FALSE	DO6650	0	331-01-3TD	FALSE		1.15692e-05	1.20513e-07	1.39226e-06	6.52195e-08	1.03239e-05
DO6655_338-01-5TD	blood_lymphoid	ICGC_WXS_CLLE_ES	FALSE	PROF						FALSE	DO6655	0	338-01-5TD	FALSE		2.14716e-05	2.23663e-07	2.302e-06	1.333e-07	1.998e-05
DO6660_341-01-2TD	blood_lymphoid	ICGC_WXS_CLLE_ES	FALSE	PROF						FALSE	DO6660	0	341-01-2TD	FALSE		1.7834e-05	1.85771e-07	3.10498e-06	5.88487e-08	1.70166e-05
DO6670_344-01-7TD	blood_lymphoid	ICGC_WXS_CLLE_ES	FALSE	PROF						FALSE	DO6670	0	344-01-7TD	FALSE		8.58171e-06	8.93928e-08	6.17396e-07	6.64362e-08	1.04158e-05
DO6675_345-01-3TD	blood_lymphoid	ICGC_WXS_CLLE_ES	FALSE	PROF						FALSE	DO6675	0	345-01-3TD	FALSE		1.70704e-05	1.77816e-07	1.34848e-06	1.26918e-07	1.79465e-05
DO6680_350-01-1TD	blood_lymphoid	ICGC_WXS_CLLE_ES	FALSE	PROF						FALSE	DO6680	0	350-01-1TD	FALSE		1.29841e-05	1.35251e-07	1.75096e-06	6.50035e-08	1.1564e-05
DO6685_351-01-4TD	blood_lymphoid	ICGC_WXS_CLLE_ES	FALSE	PROF						FALSE	DO6685	0	351-01-4TD	FALSE		1.55156e-05	1.61621e-07	1.75453e-06	9.23644e-08	1.64296e-05
DO6706_375-1099-15TD	blood_lymphoid	ICGC_WXS_CLLE_ES	FALSE	PROF						FALSE	DO6706	0	375-1099-15TD	FALSE		1.52305e-05	1.58651e-07	1.10544e-06	1.17486e-07	1.60065e-05
DO6712_475-02-10TD	blood_lymphoid	ICGC_WXS_CLLE_ES	FALSE	PROF						FALSE	DO6712	0	475-02-10TD	FALSE		1.22187e-05	1.27279e-07	1.10544e-06	8.47497e-08	1.19324e-05
DO6718_535-02-4TD	blood_lymphoid	ICGC_WXS_CLLE_ES	FALSE	PROF						FALSE	DO6718	0	535-02-4TD	FALSE		1.38239e-05	1.43998e-07	3.30583e-07	1.35886e-07	1.25697e-05
DO6730_618-1503-04TD	blood_lymphoid	ICGC_WXS_CLLE_ES	FALSE	PROF						FALSE	DO6730	0	618-1503-04TD	FALSE		1.03314e-05	1.07619e-07	1.46414e-06	4.86393e-08	1.196e-05
DO6736_680-1992-01TD	blood_lymphoid	ICGC_WXS_CLLE_ES	FALSE	PROF						FALSE	DO6736	0	680-1992-01TD	FALSE		4.0189e-05	4.18635e-07	4.99242e-06	2.19775e-07	4.05542e-05
DO6748_761-01-1TD	blood_lymphoid	ICGC_WXS_CLLE_ES	FALSE	PROF						FALSE	DO6748	0	761-01-1TD	FALSE		4.99681e-06	5.20501e-08	0	5.43132e-08	6.17618e-06
DO6754_785-1836-01TD	blood_lymphoid	ICGC_WXS_CLLE_ES	FALSE	PROF						FALSE	DO6754	0	785-1836-01TD	FALSE		8.4843e-06	8.83781e-08	1.26291e-06	3.73116e-08	8.03378e-06
DO6760_815-01-2TD	blood_lymphoid	ICGC_WXS_CLLE_ES	FALSE	PROF						FALSE	DO6760	0	815-01-2TD	FALSE		1.07928e-05	1.12425e-07	6.17396e-07	9.047e-08	1.16374e-05
DO6898_006-0018-01TD	blood_lymphoid	ICGC_WXS_CLLE_ES	FALSE	PROF						FALSE	DO6898	0	006-0018-01TD	FALSE		1.7851e-05	1.85948e-07	1.63726e-06	1.22848e-07	1.67112e-05
DO6904_013-0035-01TD	blood_lymphoid	ICGC_WXS_CLLE_ES	FALSE	PROF						FALSE	DO6904	0	013-0035-01TD	FALSE		1.87265e-05	1.95068e-07	2.58524e-06	9.11474e-08	1.6852e-05
DO6910_038-0087-01TD	blood_lymphoid	ICGC_WXS_CLLE_ES	FALSE	PROF						FALSE	DO6910	0	038-0087-01TD	FALSE		9.92838e-06	1.03421e-07	1.10544e-06	5.98545e-08	8.84772e-06
DO6922_054-0114-05TD	blood_lymphoid	ICGC_WXS_CLLE_ES	FALSE	PROF						FALSE	DO6922	0	054-0114-05TD	FALSE		1.42325e-05	1.48255e-07	1.10901e-06	1.06483e-07	1.41684e-05
DO6928_091-01-6TD	blood_lymphoid	ICGC_WXS_CLLE_ES	FALSE	PROF						FALSE	DO6928	0	091-01-6TD	FALSE		9.2076e-06	9.59125e-08	1.10544e-06	5.20199e-08	1.05874e-05
DO6928_091-03-01TD	blood_lymphoid	ICGC_WXS_CLLE_ES	FALSE	PROF						FALSE	DO6928	0	091-03-01TD	FALSE		7.09029e-06	7.38572e-08	2.86812e-07	6.45983e-08	1.09216e-05
DO6934_141-02-3TD	blood_lymphoid	ICGC_WXS_CLLE_ES	FALSE	PROF						FALSE	DO6934	0	141-02-3TD	FALSE		8.30852e-06	8.65471e-08	9.04208e-07	5.09966e-08	7.8524e-06
DO6940_145-01-1TD	blood_lymphoid	ICGC_WXS_CLLE_ES	FALSE	PROF						FALSE	DO6940	0	145-01-1TD	FALSE		7.58229e-06	7.89821e-08	8.22202e-07	4.66682e-08	1.02803e-05
DO6946_148-02-3TD	blood_lymphoid	ICGC_WXS_CLLE_ES	FALSE	PROF						FALSE	DO6946	0	148-02-3TD	FALSE		2.59203e-06	2.70003e-08	4.88048e-07	6.95479e-09	6.34144e-06
DO6952_165-01-5TD	blood_lymphoid	ICGC_WXS_CLLE_ES	FALSE	PROF						FALSE	DO6952	0	165-01-5TD	FALSE		1.34892e-05	1.40513e-07	2.08868e-06	5.58096e-08	1.0964e-05
DO6958_178-01-2TD	blood_lymphoid	ICGC_WXS_CLLE_ES	FALSE	PROF						FALSE	DO6958	0	178-01-2TD	FALSE		2.06718e-05	2.15331e-07	3.50191e-06	7.24363e-08	1.88707e-05
DO6964_266-01-7TD	blood_lymphoid	ICGC_WXS_CLLE_ES	FALSE	PROF						FALSE	DO6964	0	266-01-7TD	FALSE		9.13492e-06	9.51555e-08	2.86812e-07	8.68226e-08	9.08269e-06
DO6970_272-01-2TD	blood_lymphoid	ICGC_WXS_CLLE_ES	FALSE	PROF						FALSE	DO6970	0	272-01-2TD	FALSE		1.8094e-05	1.8848e-07	1.39583e-06	1.35986e-07	1.70678e-05
DO6976_279-01-4TD	blood_lymphoid	ICGC_WXS_CLLE_ES	FALSE	PROF						FALSE	DO6976	0	279-01-4TD	FALSE		1.02433e-05	1.06701e-07	1.10544e-06	6.32775e-08	1.00757e-05
DO6982_321-01-1TD	blood_lymphoid	ICGC_WXS_CLLE_ES	FALSE	PROF						FALSE	DO6982	0	321-01-1TD	FALSE		1.72207e-05	1.79382e-07	2.8564e-06	6.29899e-08	1.76035e-05
DO6988_328-01-1TD	blood_lymphoid	ICGC_WXS_CLLE_ES	FALSE	PROF						FALSE	DO6988	0	328-01-1TD	FALSE		3.83164e-05	3.99129e-07	2.93186e-06	2.8901e-07	3.56521e-05
DO6994_642-1991-01TD	blood_lymphoid	ICGC_WXS_CLLE_ES	FALSE	PROF						FALSE	DO6994	0	642-1991-01TD	FALSE		1.37923e-05	1.4367e-07	1.7983e-06	7.17294e-08	1.30644e-05
DO7000_758-2041-01TD	blood_lymphoid	ICGC_WXS_CLLE_ES	FALSE	PROF						FALSE	DO7000	0	758-2041-01TD	FALSE		2.05914e-05	2.14493e-07	3.02952e-06	9.21011e-08	2.11595e-05
DO7030_149-04-01TD	blood_lymphoid	ICGC_WXS_CLLE_ES	FALSE	PROF						FALSE	DO7030	0	149-04-01TD	FALSE		1.07543e-05	1.12024e-07	1.10544e-06	6.88314e-08	1.2914e-05
DO7042_158-01-1TD	blood_lymphoid	ICGC_WXS_CLLE_ES	FALSE	PROF						FALSE	DO7042	0	158-01-1TD	FALSE		1.70146e-05	1.77236e-07	1.95933e-06	9.97534e-08	1.74324e-05
DO7060_302-02-5TD	blood_lymphoid	ICGC_WXS_CLLE_ES	FALSE	PROF						FALSE	DO7060	0	302-02-5TD	FALSE		1.05545e-05	1.09942e-07	1.4798e-06	5.03835e-08	1.07974e-05
DO7066_307-02-01TD	blood_lymphoid	ICGC_WXS_CLLE_ES	FALSE	PROF						FALSE	DO7066	0	307-02-01TD	FALSE		1.01243e-05	1.05461e-07	9.04208e-07	7.07329e-08	1.58445e-05
DO7072_333-01-1TD	blood_lymphoid	ICGC_WXS_CLLE_ES	FALSE	PROF						FALSE	DO7072	0	333-01-1TD	FALSE		1.04768e-05	1.09134e-07	8.18631e-07	7.82861e-08	1.05624e-05
DO7078_352-02-3TD	blood_lymphoid	ICGC_WXS_CLLE_ES	FALSE	PROF						FALSE	DO7078	0	352-02-3TD	FALSE		7.47414e-06	7.78557e-08	3.30583e-07	6.68675e-08	7.67626e-06
DO7090_361-01-8TD	blood_lymphoid	ICGC_WXS_CLLE_ES	FALSE	PROF						FALSE	DO7090	0	361-01-8TD	FALSE		2.0023e-05	2.08572e-07	1.95933e-06	1.32452e-07	1.98214e-05
DO7096_362-01-4TD	blood_lymphoid	ICGC_WXS_CLLE_ES	FALSE	PROF						FALSE	DO7096	0	362-01-4TD	FALSE		1.45138e-05	1.51186e-07	1.7983e-06	7.95723e-08	1.61827e-05
DO7102_366-01-9TD	blood_lymphoid	ICGC_WXS_CLLE_ES	FALSE	PROF						FALSE	DO7102	0	366-01-9TD	FALSE		9.49544e-06	9.89109e-08	9.9175e-07	6.00918e-08	9.11254e-06
DO7118_381-01-3TD	blood_lymphoid	ICGC_WXS_CLLE_ES	FALSE	PROF						FALSE	DO7118	0	381-01-3TD	FALSE		2.02909e-05	2.11363e-07	1.8803e-06	1.38801e-07	1.82298e-05
DO7130_387-01-7TD	blood_lymphoid	ICGC_WXS_CLLE_ES	FALSE	PROF						FALSE	DO7130	0	387-01-7TD	FALSE		8.47572e-06	8.82887e-08	9.79667e-07	4.95332e-08	6.92115e-06
DO7142_395-01-9TD	blood_lymphoid	ICGC_WXS_CLLE_ES	FALSE	PROF						FALSE	DO7142	0	395-01-9TD	FALSE		6.15195e-06	6.40828e-08	7.7486e-07	3.31795e-08	5.5784e-06
DO7148_396-01-9TD	blood_lymphoid	ICGC_WXS_CLLE_ES	FALSE	PROF						FALSE	DO7148	0	396-01-9TD	FALSE		2.6151e-05	2.72406e-07	2.57673e-06	1.72218e-07	2.36015e-05
DO7160_422-02-2TD	blood_lymphoid	ICGC_WXS_CLLE_ES	FALSE	PROF						FALSE	DO7160	0	422-02-2TD	FALSE		1.76544e-05	1.839e-07	1.67907e-06	1.18892e-07	1.47078e-05
DO7178_464-02-5TD	blood_lymphoid	ICGC_WXS_CLLE_ES	FALSE	PROF						FALSE	DO7178	0	464-02-5TD	FALSE		1.62697e-05	1.69476e-07	9.04208e-07	1.37531e-07	2.08845e-05
DO7184_466-02-4TD	blood_lymphoid	ICGC_WXS_CLLE_ES	FALSE	PROF						FALSE	DO7184	0	466-02-4TD	FALSE		9.2207e-06	9.60489e-08	1.26291e-06	4.5316e-08	8.55087e-06
DO7190_472-02-5TD	blood_lymphoid	ICGC_WXS_CLLE_ES	FALSE	PROF						FALSE	DO7190	0	472-02-5TD	FALSE		1.69592e-05	1.76658e-07	2.90374e-06	5.80892e-08	1.37738e-05
DO7208_509-02-2TD	blood_lymphoid	ICGC_WXS_CLLE_ES	FALSE	PROF						FALSE	DO7208	0	509-02-2TD	FALSE		9.84583e-06	1.02561e-07	9.47979e-07	6.58034e-08	1.62103e-05
DO7220_544-02-01TD	blood_lymphoid	ICGC_WXS_CLLE_ES	FALSE	PROF						FALSE	DO7220	0	544-02-01TD	FALSE		1.2684e-05	1.32125e-07	4.91619e-07	1.16495e-07	1.40075e-05
DO7244_575-01-4TD	blood_lymphoid	ICGC_WXS_CLLE_ES	FALSE	PROF						FALSE	DO7244	0	575-01-4TD	FALSE		1.62519e-05	1.6929e-07	2.05342e-06	8.73713e-08	1.49152e-05
DO7250_583-01-1TD	blood_lymphoid	ICGC_WXS_CLLE_ES	FALSE	PROF						FALSE	DO7250	0	583-01-1TD	FALSE		6.48275e-06	6.75286e-08	4.88048e-07	4.92452e-08	6.28751e-06
DO7256_586-01-8TD	blood_lymphoid	ICGC_WXS_CLLE_ES	FALSE	PROF						FALSE	DO7256	0	586-01-8TD	FALSE		8.41357e-06	8.76414e-08	3.30583e-07	7.70787e-08	8.59638e-06
DO7262_593-01-1TD	blood_lymphoid	ICGC_WXS_CLLE_ES	FALSE	PROF						FALSE	DO7262	0	593-01-1TD	FALSE		8.60358e-06	8.96206e-08	4.91619e-07	7.21424e-08	9.25787e-06
DO7268_621-02-3TD	blood_lymphoid	ICGC_WXS_CLLE_ES	FALSE	PROF						FALSE	DO7268	0	621-02-3TD	FALSE		6.15561e-06	6.41209e-08	1.26291e-06	1.19998e-08	6.61364e-06
DO7274_629-07-01TD	blood_lymphoid	ICGC_WXS_CLLE_ES	FALSE	PROF						FALSE	DO7274	0	629-07-01TD	FALSE		1.37193e-05	1.42909e-07	1.26291e-06	9.42136e-08	1.86893e-05
DO7286_663-02-2TD	blood_lymphoid	ICGC_WXS_CLLE_ES	FALSE	PROF						FALSE	DO7286	0	663-02-2TD	FALSE		6.70648e-06	6.98592e-08	4.91619e-07	5.15218e-08	6.15692e-06
DO7298_669-02-3TD	blood_lymphoid	ICGC_WXS_CLLE_ES	FALSE	PROF						FALSE	DO7298	0	669-02-3TD	FALSE		1.03008e-05	1.073e-07	6.61167e-07	8.32189e-08	8.4742e-06
DO7310_722-1923-01TD	blood_lymphoid	ICGC_WXS_CLLE_ES	FALSE	PROF						FALSE	DO7310	0	722-1923-01TD	FALSE		7.15185e-06	7.44984e-08	8.18631e-07	4.21448e-08	6.8845e-06
DO7316_733-02-4TD	blood_lymphoid	ICGC_WXS_CLLE_ES	FALSE	PROF						FALSE	DO7316	0	733-02-4TD	FALSE		2.36204e-05	2.46046e-07	1.88745e-06	1.74681e-07	2.26282e-05
DO7340_762-01-9TD	blood_lymphoid	ICGC_WXS_CLLE_ES	FALSE	PROF						FALSE	DO7340	0	762-01-9TD	FALSE		1.11745e-05	1.16402e-07	1.72641e-06	4.64011e-08	9.9337e-06
DO7346_772-01-2TD	blood_lymphoid	ICGC_WXS_CLLE_ES	FALSE	PROF						FALSE	DO7346	0	772-01-2TD	FALSE		1.81598e-05	1.89164e-07	2.24257e-06	9.98854e-08	1.7886e-05
DO7364_809-01-5TD	blood_lymphoid	ICGC_WXS_CLLE_ES	FALSE	PROF						FALSE	DO7364	0	809-01-5TD	FALSE		8.90637e-06	9.27747e-08	4.88048e-07	7.55889e-08	1.12117e-05
DO7388_1100-01-2TD	blood_lymphoid	ICGC_WXS_CLLE_ES	FALSE	PROF						FALSE	DO7388	0	1100-01-2TD	FALSE		1.85004e-05	1.92712e-07	1.31025e-06	1.44124e-07	2.1675e-05
DO7400_1103-01-03TD	blood_lymphoid	ICGC_WXS_CLLE_ES	FALSE	PROF						FALSE	DO7400	0	1103-01-03TD	FALSE		1.19412e-05	1.24388e-07	2.21089e-06	3.36702e-08	1.05609e-05
DO7406_1163-01-01TD	blood_lymphoid	ICGC_WXS_CLLE_ES	FALSE	PROF						FALSE	DO7406	0	1163-01-01TD	FALSE		2.39317e-05	2.49289e-07	1.7983e-06	1.81941e-07	2.98708e-05
DO7418_1165-02-02TD	blood_lymphoid	ICGC_WXS_CLLE_ES	FALSE	PROF						FALSE	DO7418	0	1165-02-02TD	FALSE		4.9748e-06	5.18208e-08	9.76095e-07	1.16349e-08	6.02887e-06
DO7424_1166-01-01TD	blood_lymphoid	ICGC_WXS_CLLE_ES	FALSE	PROF						FALSE	DO7424	0	1166-01-01TD	FALSE		1.23078e-05	1.28206e-07	1.7983e-06	5.55936e-08	1.13136e-05
DO7430_1167-01-01TD	blood_lymphoid	ICGC_WXS_CLLE_ES	FALSE	PROF						FALSE	DO7430	0	1167-01-01TD	FALSE		6.41646e-06	6.68381e-08	6.17396e-07	4.29008e-08	8.33619e-06
DO7436_1168-01-01TD	blood_lymphoid	ICGC_WXS_CLLE_ES	FALSE	PROF						FALSE	DO7436	0	1168-01-01TD	FALSE		1.40605e-05	1.46464e-07	8.22202e-07	1.17084e-07	1.67992e-05
DO7448_1175-01-01TD	blood_lymphoid	ICGC_WXS_CLLE_ES	FALSE	PROF						FALSE	DO7448	0	1175-01-01TD	FALSE		6.45103e-06	6.71982e-08	4.88048e-07	4.89004e-08	1.14666e-05
DO7454_1178-01-04TD	blood_lymphoid	ICGC_WXS_CLLE_ES	FALSE	PROF						FALSE	DO7454	0	1178-01-04TD	FALSE		1.51137e-05	1.57435e-07	1.15279e-06	1.14159e-07	2.18037e-05
DO7466_1181-01-04TD	blood_lymphoid	ICGC_WXS_CLLE_ES	FALSE	PROF						FALSE	DO7466	0	1181-01-04TD	FALSE		9.54226e-06	9.93986e-08	1.27005e-06	4.85007e-08	1.74298e-05
DO7478_1184-01-04TD	blood_lymphoid	ICGC_WXS_CLLE_ES	FALSE	PROF						FALSE	DO7478	0	1184-01-04TD	FALSE		1.06606e-05	1.11048e-07	3.30583e-07	1.01503e-07	1.33263e-05
DO7484_1185-01-03TD	blood_lymphoid	ICGC_WXS_CLLE_ES	FALSE	PROF						FALSE	DO7484	0	1185-01-03TD	FALSE		1.75002e-05	1.82294e-07	1.92765e-06	1.06409e-07	1.88519e-05
DO7490_1220-01-03TD	blood_lymphoid	ICGC_WXS_CLLE_ES	FALSE	PROF						FALSE	DO7490	0	1220-01-03TD	FALSE		1.36636e-05	1.42329e-07	1.26291e-06	9.36078e-08	1.51332e-05
DO7496_1221-01-04TD	blood_lymphoid	ICGC_WXS_CLLE_ES	FALSE	PROF						FALSE	DO7496	0	1221-01-04TD	FALSE		9.857e-06	1.02677e-07	1.27005e-06	5.19217e-08	7.97019e-06
DO7502_1222-01-04TD	blood_lymphoid	ICGC_WXS_CLLE_ES	FALSE	PROF						FALSE	DO7502	0	1222-01-04TD	FALSE		1.36517e-05	1.42205e-07	9.04208e-07	1.09075e-07	1.85081e-05
DO7505_1223-01-03TD	blood_lymphoid	ICGC_WXS_CLLE_ES	FALSE	PROF						FALSE	DO7505	0	1223-01-03TD	FALSE		9.06669e-06	9.44447e-08	6.61167e-07	6.98046e-08	1.30789e-05
DO7511_1224-01-02TD	blood_lymphoid	ICGC_WXS_CLLE_ES	FALSE	PROF						FALSE	DO7511	0	1224-01-02TD	FALSE		8.46483e-06	8.81754e-08	1.34848e-06	3.33793e-08	1.0695e-05
DO7517_1228-01-03TD	blood_lymphoid	ICGC_WXS_CLLE_ES	FALSE	PROF						FALSE	DO7517	0	1228-01-03TD	FALSE		1.10811e-05	1.15429e-07	1.47129e-06	5.64783e-08	1.17294e-05
DO7529_PD6148a	blood_myeloid	ICGC_WXS_CMDI_UK	FALSE	PROF						FALSE	DO7529	0	PD6148a	FALSE		1.14725e-06	1.19505e-08	2.86812e-07	0	9.15285e-07
DO7531_PD4800a	blood_myeloid	ICGC_WXS_CMDI_UK	FALSE	PROF						FALSE	DO7531	0	PD4800a	FALSE		3.65932e-06	3.81179e-08	3.30583e-07	2.5402e-08	6.94751e-06
DO7547_PD4175a	blood_myeloid	ICGC_WXS_CMDI_UK	FALSE	PROF						FALSE	DO7547	0	PD4175a	FALSE		5.51544e-06	5.74525e-08	3.30583e-07	4.55772e-08	5.66907e-06
DO7549_PD4179a	blood_myeloid	ICGC_WXS_CMDI_UK	FALSE	PROF						FALSE	DO7549	0	PD4179a	FALSE		1.16711e-05	1.21574e-07	2.86812e-07	1.14389e-07	1.06919e-05
DO7581_PD2184a	blood_myeloid	ICGC_WXS_CMDI_UK	FALSE	PROF						FALSE	DO7581	0	PD2184a	FALSE		1.95219e-06	2.03353e-08	4.88048e-07	0	1.59994e-06
DO7615_PD4771a	blood_myeloid	ICGC_WXS_CMDI_UK	FALSE	PROF						FALSE	DO7615	0	PD4771a	FALSE		6.08018e-06	6.33352e-08	2.86812e-07	5.36188e-08	5.37473e-06
DO7633_PD4176a	blood_myeloid	ICGC_WXS_CMDI_UK	FALSE	PROF						FALSE	DO7633	0	PD4176a	FALSE		2.20056e-06	2.29225e-08	2.86812e-07	1.1449e-08	2.23568e-06
DO7669_PD4182a	blood_myeloid	ICGC_WXS_CMDI_UK	FALSE	PROF						FALSE	DO7669	0	PD4182a	FALSE		1.95219e-06	2.03353e-08	4.88048e-07	0	1.59994e-06
DO7769_PD6511a	blood_myeloid	ICGC_WXS_CMDI_UK	FALSE	PROF						FALSE	DO7769	0	PD6511a	FALSE		1.14725e-06	1.19505e-08	2.86812e-07	0	9.15285e-07
DO219884_TCGA-FA-8693-01A-11D-2397-10	blood_lymphoid	ICGC_WXS_DLBC_US_TCGA	FALSE	PROF					0.140303	FALSE	DO219884	0	TCGA-FA-8693	TRUE	TCGA-FA-8693-01A-11D-2397-10	0.000132243	1.37753e-06	1.21676e-05	9.08397e-07	0.000143138
DO219885_TCGA-FA-A4BB-01A-11D-A31X-10	blood_lymphoid	ICGC_WXS_DLBC_US_TCGA	FALSE	PROF					0.131774	FALSE	DO219885	0	TCGA-FA-A4BB	TRUE	TCGA-FA-A4BB-01A-11D-A31X-10	0.000130396	1.3583e-06	1.9529e-05	5.68266e-07	0.000129558
DO219886_TCGA-FA-A4XK-01A-11D-A31X-10	blood_lymphoid	ICGC_WXS_DLBC_US_TCGA	FALSE	PROF					0.113747	FALSE	DO219886	0	TCGA-FA-A4XK	TRUE	TCGA-FA-A4XK-01A-11D-A31X-10	8.9442e-05	9.31688e-07	1.021e-05	5.28281e-07	9.73815e-05
DO219887_TCGA-FA-A6HN-01A-11D-A31X-10	blood_lymphoid	ICGC_WXS_DLBC_US_TCGA	FALSE	PROF					0.123858	FALSE	DO219887	0	TCGA-FA-A6HN	TRUE	TCGA-FA-A6HN-01A-11D-A31X-10	0.000150009	1.56259e-06	1.18945e-05	1.11338e-06	0.000160131
DO219888_TCGA-FA-A6HO-01A-11D-A31X-10	blood_lymphoid	ICGC_WXS_DLBC_US_TCGA	FALSE	PROF					0.127234	FALSE	DO219888	0	TCGA-FA-A6HO	TRUE	TCGA-FA-A6HO-01A-11D-A31X-10	5.82723e-05	6.07003e-07	7.25363e-06	3.18019e-07	6.04965e-05
DO219889_TCGA-FA-A7DS-01A-11D-A382-10	blood_lymphoid	ICGC_WXS_DLBC_US_TCGA	FALSE	PROF					0.112429	FALSE	DO219889	0	TCGA-FA-A7DS	TRUE	TCGA-FA-A7DS-01A-11D-A382-10	9.23206e-05	9.61673e-07	1.07195e-05	5.37419e-07	0.000107988
DO219890_TCGA-FA-A7Q1-01A-11D-A382-10	blood_lymphoid	ICGC_WXS_DLBC_US_TCGA	FALSE	PROF					0.110652	FALSE	DO219890	0	TCGA-FA-A7Q1	TRUE	TCGA-FA-A7Q1-01A-11D-A382-10	0.000175771	1.83095e-06	2.38377e-05	8.74138e-07	0.000189153
DO219891_TCGA-FA-A82F-01A-11D-A382-10	blood_lymphoid	ICGC_WXS_DLBC_US_TCGA	FALSE	PROF					0.110793	FALSE	DO219891	0	TCGA-FA-A82F	TRUE	TCGA-FA-A82F-01A-11D-A382-10	0.000161206	1.67923e-06	2.00984e-05	8.78396e-07	0.000162132
DO219892_TCGA-FA-A86F-01A-11D-A382-10	blood_lymphoid	ICGC_WXS_DLBC_US_TCGA	FALSE	PROF					0.135134	FALSE	DO219892	0	TCGA-FA-A86F	TRUE	TCGA-FA-A86F-01A-11D-A382-10	0.000100707	1.04903e-06	9.78498e-06	6.69205e-07	9.81066e-05
DO219893_TCGA-FF-A7CQ-01A-11D-A382-10	blood_lymphoid	ICGC_WXS_DLBC_US_TCGA	FALSE	PROF					0.111657	FALSE	DO219893	0	TCGA-FF-A7CQ	TRUE	TCGA-FF-A7CQ-01A-11D-A382-10	0.000112655	1.17349e-06	1.20187e-05	7.01964e-07	0.000127766
DO219894_TCGA-FF-A7CR-01A-11D-A382-10	blood_lymphoid	ICGC_WXS_DLBC_US_TCGA	FALSE	PROF					0.117678	FALSE	DO219894	0	TCGA-FF-A7CR	TRUE	TCGA-FF-A7CR-01A-11D-A382-10	0.000173703	1.80941e-06	1.88617e-05	1.068e-06	0.000204094
DO219895_TCGA-FF-A7CW-01A-11D-A382-10	blood_lymphoid	ICGC_WXS_DLBC_US_TCGA	FALSE	PROF					0.122739	FALSE	DO219895	0	TCGA-FF-A7CW	TRUE	TCGA-FF-A7CW-01A-11D-A382-10	4.95942e-05	5.16607e-07	7.66324e-06	2.05883e-07	4.78314e-05
DO219896_TCGA-FF-A7CX-01A-12D-A382-10	blood_lymphoid	ICGC_WXS_DLBC_US_TCGA	FALSE	PROF					0.103503	FALSE	DO219896	0	TCGA-FF-A7CX	TRUE	TCGA-FF-A7CX-01A-12D-A382-10	0.000135237	1.40872e-06	2.13198e-05	5.4302e-07	0.00013896
DO219907_TCGA-GR-A4D4-01A-11D-A31X-10	blood_lymphoid	ICGC_WXS_DLBC_US_TCGA	FALSE	PROF					0.126642	FALSE	DO219907	0	TCGA-GR-A4D4	TRUE	TCGA-GR-A4D4-01A-11D-A31X-10	7.17168e-05	7.4705e-07	4.06665e-06	6.02719e-07	8.18456e-05
DO219908_TCGA-GR-A4D5-01A-11D-A31X-10	blood_lymphoid	ICGC_WXS_DLBC_US_TCGA	FALSE	PROF					0.132987	FALSE	DO219908	0	TCGA-GR-A4D5	TRUE	TCGA-GR-A4D5-01A-11D-A31X-10	6.51291e-05	6.78428e-07	1.18299e-05	1.93582e-07	6.91001e-05
DO219909_TCGA-GR-A4D6-01A-11D-A31X-10	blood_lymphoid	ICGC_WXS_DLBC_US_TCGA	FALSE	PROF					0.146253	FALSE	DO219909	0	TCGA-GR-A4D6	TRUE	TCGA-GR-A4D6-01A-11D-A31X-10	5.56386e-05	5.79568e-07	8.11406e-06	2.51981e-07	5.9629e-05
DO219910_TCGA-GR-A4D9-01B-11D-A31X-10	blood_lymphoid	ICGC_WXS_DLBC_US_TCGA	FALSE	PROF					0.112719	FALSE	DO219910	0	TCGA-GR-A4D9	TRUE	TCGA-GR-A4D9-01B-11D-A31X-10	6.95725e-05	7.24713e-07	8.74946e-06	3.75811e-07	6.93318e-05
DO219911_TCGA-GS-A9TQ-01A-11D-A382-10	blood_lymphoid	ICGC_WXS_DLBC_US_TCGA	FALSE	PROF					0.10447	FALSE	DO219911	0	TCGA-GS-A9TQ	TRUE	TCGA-GS-A9TQ-01A-11D-A382-10	0.000176003	1.83336e-06	2.33132e-05	8.99457e-07	0.000189415
DO219912_TCGA-GS-A9TT-01A-11D-A382-10	blood_lymphoid	ICGC_WXS_DLBC_US_TCGA	FALSE	PROF					0.0887811	FALSE	DO219912	0	TCGA-GS-A9TT	TRUE	TCGA-GS-A9TT-01A-11D-A382-10	0.000226962	2.36419e-06	2.53214e-05	1.36605e-06	0.0002411
DO219913_TCGA-GS-A9TU-01A-11D-A382-10	blood_lymphoid	ICGC_WXS_DLBC_US_TCGA	FALSE	PROF					0.141892	FALSE	DO219913	0	TCGA-GS-A9TU	TRUE	TCGA-GS-A9TU-01A-11D-A382-10	6.17565e-05	6.43297e-07	7.74227e-06	3.34645e-07	6.71417e-05
DO219914_TCGA-GS-A9TV-01A-11D-A382-10	blood_lymphoid	ICGC_WXS_DLBC_US_TCGA	FALSE	PROF					0.136626	FALSE	DO219914	0	TCGA-GS-A9TV	TRUE	TCGA-GS-A9TV-01A-11D-A382-10	9.23465e-05	9.61943e-07	8.15129e-06	6.49363e-07	8.72889e-05
DO219915_TCGA-GS-A9TW-01A-11D-A382-10	blood_lymphoid	ICGC_WXS_DLBC_US_TCGA	FALSE	PROF					0.11529	FALSE	DO219915	0	TCGA-GS-A9TW	TRUE	TCGA-GS-A9TW-01A-11D-A382-10	0.000293518	3.05748e-06	3.17069e-05	1.81185e-06	0.000303077
DO219916_TCGA-GS-A9TX-01A-11D-A382-10	blood_lymphoid	ICGC_WXS_DLBC_US_TCGA	FALSE	PROF					0.135494	FALSE	DO219916	0	TCGA-GS-A9TX	TRUE	TCGA-GS-A9TX-01A-11D-A382-10	7.71622e-05	8.03773e-07	1.04915e-05	3.82566e-07	8.21268e-05
DO219917_TCGA-GS-A9TY-01A-11D-A38X-10	blood_lymphoid	ICGC_WXS_DLBC_US_TCGA	FALSE	PROF					0.110938	FALSE	DO219917	0	TCGA-GS-A9TY	TRUE	TCGA-GS-A9TY-01A-11D-A38X-10	0.000152294	1.5864e-06	2.06172e-05	7.58971e-07	0.000154786
DO219918_TCGA-GS-A9TZ-01A-11D-A38X-10	blood_lymphoid	ICGC_WXS_DLBC_US_TCGA	FALSE	PROF					0.115286	FALSE	DO219918	0	TCGA-GS-A9TZ	TRUE	TCGA-GS-A9TZ-01A-11D-A38X-10	0.000393827	4.10237e-06	4.11226e-05	2.49279e-06	0.000412076
DO219919_TCGA-GS-A9U3-01A-11D-A38X-10	blood_lymphoid	ICGC_WXS_DLBC_US_TCGA	FALSE	PROF					0.153021	FALSE	DO219919	0	TCGA-GS-A9U3	TRUE	TCGA-GS-A9U3-01A-11D-A38X-10	9.53312e-05	9.93033e-07	1.49666e-05	3.85489e-07	8.97678e-05
DO219920_TCGA-GS-A9U4-01A-11D-A38X-10	blood_lymphoid	ICGC_WXS_DLBC_US_TCGA	FALSE	PROF					0.14629	FALSE	DO219920	0	TCGA-GS-A9U4	TRUE	TCGA-GS-A9U4-01A-11D-A38X-10	4.37928e-05	4.56175e-07	7.8942e-06	1.32783e-07	4.76116e-05
DO219921_TCGA-RQ-A68N-01A-11D-A31X-10	blood_lymphoid	ICGC_WXS_DLBC_US_TCGA	FALSE	PROF					0.1176	FALSE	DO219921	0	TCGA-RQ-A68N	TRUE	TCGA-RQ-A68N-01A-11D-A31X-10	0.000200347	2.08695e-06	2.52388e-05	1.08035e-06	0.000209386
DO219922_TCGA-RQ-A6JB-01A-11D-A31X-10	blood_lymphoid	ICGC_WXS_DLBC_US_TCGA	FALSE	PROF					0.120444	FALSE	DO219922	0	TCGA-RQ-A6JB	TRUE	TCGA-RQ-A6JB-01A-11D-A31X-10	8.52737e-05	8.88267e-07	7.85596e-06	5.85324e-07	9.02546e-05
DO219924_TCGA-RQ-AAAT-01A-11D-A38X-10	blood_lymphoid	ICGC_WXS_DLBC_US_TCGA	FALSE	PROF					0.104241	FALSE	DO219924	0	TCGA-RQ-AAAT	TRUE	TCGA-RQ-AAAT-01A-11D-A38X-10	0.000162997	1.69788e-06	1.7702e-05	1.00205e-06	0.000169035
DO222303_TCGA-FF-8046-01A-11D-2210-10	blood_lymphoid	ICGC_WXS_DLBC_US_TCGA	FALSE	PROF					0.12496	FALSE	DO222303	0	TCGA-FF-8046	TRUE	TCGA-FF-8046-01A-11D-2210-10	6.40951e-05	6.67657e-07	8.38939e-06	3.31929e-07	7.12685e-05
DO222304_TCGA-FF-8047-01A-11D-2210-10	blood_lymphoid	ICGC_WXS_DLBC_US_TCGA	FALSE	PROF					0.224156	FALSE	DO222304	0	TCGA-FF-8047	TRUE	TCGA-FF-8047-01A-11D-2210-10	0.000118525	1.23464e-06	1.57182e-05	6.04919e-07	0.000119227
DO222305_TCGA-FF-8041-01A-11D-2210-10	blood_lymphoid	ICGC_WXS_DLBC_US_TCGA	FALSE	PROF					0.1247	FALSE	DO222305	0	TCGA-FF-8041	TRUE	TCGA-FF-8041-01A-11D-2210-10	0.000178172	1.85596e-06	2.18353e-05	9.87293e-07	0.000185859
DO222306_TCGA-FF-8042-01A-11D-2210-10	blood_lymphoid	ICGC_WXS_DLBC_US_TCGA	FALSE	PROF					0.112743	FALSE	DO222306	0	TCGA-FF-8042	TRUE	TCGA-FF-8042-01A-11D-2210-10	0.000206203	2.14795e-06	1.96662e-05	1.38628e-06	0.000210676
DO222307_TCGA-FF-8061-01A-11D-2210-10	blood_lymphoid	ICGC_WXS_DLBC_US_TCGA	FALSE	PROF					0.145509	FALSE	DO222307	0	TCGA-FF-8061	TRUE	TCGA-FF-8061-01A-11D-2210-10	0.000117436	1.22329e-06	1.28216e-05	7.19015e-07	0.000118965
DO222308_TCGA-FF-8043-01A-11D-2210-10	blood_lymphoid	ICGC_WXS_DLBC_US_TCGA	FALSE	PROF					0.114983	FALSE	DO222308	0	TCGA-FF-8043	TRUE	TCGA-FF-8043-01A-11D-2210-10	8.56572e-05	8.92262e-07	1.13801e-05	4.3627e-07	0.000101804
DO223730_TCGA-VB-A8QN-01A-11D-A382-10	blood_lymphoid	ICGC_WXS_DLBC_US_TCGA	FALSE	PROF					0.237956	FALSE	DO223730	0	TCGA-VB-A8QN	TRUE	TCGA-VB-A8QN-01A-11D-A382-10	0.00016054	1.67229e-06	2.08272e-05	8.39467e-07	0.000170511
DO224550_CML001T	blood_myeloid	ICGC_WXS_LAML_CN	FALSE	PROF						FALSE	DO224550	0	CML001T	FALSE		5.43446e-06	5.6609e-08	8.18631e-07	2.34776e-08	4.41603e-06
DO224559_CML003T	blood_myeloid	ICGC_WXS_LAML_CN	FALSE	PROF						FALSE	DO224559	0	CML003T	FALSE		6.64009e-06	6.91676e-08	4.88048e-07	5.09554e-08	5.95597e-06
DO224562_CML004T	blood_myeloid	ICGC_WXS_LAML_CN	FALSE	PROF						FALSE	DO224562	0	CML004T	FALSE		5.56192e-07	5.79366e-09	0	6.04556e-09	2.03922e-06
DO224568_CML005T	blood_myeloid	ICGC_WXS_LAML_CN	FALSE	PROF						FALSE	DO224568	0	CML005T	FALSE		5.45619e-06	5.68354e-08	6.17396e-07	3.24632e-08	5.95588e-06
DO224574_CML006T	blood_myeloid	ICGC_WXS_LAML_CN	FALSE	PROF						FALSE	DO224574	0	CML006T	FALSE		6.00396e-06	6.25413e-08	1.15279e-06	1.51393e-08	5.34805e-06
DO224586_CML008T	blood_myeloid	ICGC_WXS_LAML_CN	FALSE	PROF						FALSE	DO224586	0	CML008T	FALSE		4.92536e-06	5.13058e-08	8.22202e-07	1.77886e-08	3.93336e-06
DO224591_CML009T	blood_myeloid	ICGC_WXS_LAML_CN	FALSE	PROF						FALSE	DO224591	0	CML009T	FALSE		9.13942e-06	9.52023e-08	1.30668e-06	4.25294e-08	7.44247e-06
DO224607_CML012T	blood_myeloid	ICGC_WXS_LAML_CN	FALSE	PROF						FALSE	DO224607	0	CML012T	FALSE		6.3394e-06	6.60354e-08	9.79667e-07	2.63123e-08	5.21362e-06
DO224611_CML013T	blood_myeloid	ICGC_WXS_LAML_CN	FALSE	PROF						FALSE	DO224611	0	CML013T	FALSE		8.50581e-06	8.86022e-08	9.83238e-07	4.9705e-08	7.41406e-06
DO224627_CML015T	blood_myeloid	ICGC_WXS_LAML_CN	FALSE	PROF						FALSE	DO224627	0	CML015T	FALSE		9.72451e-06	1.01297e-07	1.31025e-06	4.87339e-08	9.30258e-06
DO224631_CML016T	blood_myeloid	ICGC_WXS_LAML_CN	FALSE	PROF						FALSE	DO224631	0	CML016T	FALSE		6.0936e-06	6.3475e-08	4.91619e-07	4.48601e-08	6.07008e-06
DO224635_CML017T	blood_myeloid	ICGC_WXS_LAML_CN	FALSE	PROF						FALSE	DO224635	0	CML017T	FALSE		2.5459e-06	2.65197e-08	0	2.76728e-08	4.62621e-06
DO224641_CML019T	blood_myeloid	ICGC_WXS_LAML_CN	FALSE	PROF						FALSE	DO224641	0	CML019T	FALSE		1.81738e-06	1.89311e-08	3.30583e-07	5.38096e-09	2.52487e-06
DO224644_CML020T	blood_myeloid	ICGC_WXS_LAML_CN	FALSE	PROF						FALSE	DO224644	0	CML020T	FALSE		7.38178e-06	7.68935e-08	9.83238e-07	3.74872e-08	9.14622e-06
DO224649_CML021T	blood_myeloid	ICGC_WXS_LAML_CN	FALSE	PROF						FALSE	DO224649	0	CML021T	FALSE		1.00439e-05	1.04624e-07	1.26291e-06	5.42636e-08	1.21122e-05
DO224653_CML022T	blood_myeloid	ICGC_WXS_LAML_CN	FALSE	PROF						FALSE	DO224653	0	CML022T	FALSE		1.08141e-05	1.12647e-07	1.75096e-06	4.14162e-08	9.34721e-06
DO224659_CML023T	blood_myeloid	ICGC_WXS_LAML_CN	FALSE	PROF						FALSE	DO224659	0	CML023T	FALSE		6.41521e-06	6.68251e-08	7.7486e-07	3.6041e-08	5.24758e-06
DO224665_CML024T	blood_myeloid	ICGC_WXS_LAML_CN	FALSE	PROF						FALSE	DO224665	0	CML024T	FALSE		2.6099e-05	2.71865e-07	4.02841e-06	1.08537e-07	2.37246e-05
DO224673_CML025T	blood_myeloid	ICGC_WXS_LAML_CN	FALSE	PROF						FALSE	DO224673	0	CML025T	FALSE		8.20383e-06	8.54566e-08	4.88048e-07	6.79526e-08	7.16099e-06
DO224678_CML026T	blood_myeloid	ICGC_WXS_LAML_CN	FALSE	PROF						FALSE	DO224678	0	CML026T	FALSE		2.77028e-06	2.88571e-08	3.30583e-07	1.57386e-08	2.70262e-06
DO224683_CML027T	blood_myeloid	ICGC_WXS_LAML_CN	FALSE	PROF						FALSE	DO224683	0	CML027T	FALSE		1.07712e-05	1.122e-07	1.64083e-06	4.57381e-08	8.73934e-06
DO224686_CML028T	blood_myeloid	ICGC_WXS_LAML_CN	FALSE	PROF						FALSE	DO224686	0	CML028T	FALSE		1.58255e-06	1.64849e-08	0	1.72016e-08	2.51221e-06
DO224691_CML029T	blood_myeloid	ICGC_WXS_LAML_CN	FALSE	PROF						FALSE	DO224691	0	CML029T	FALSE		7.19662e-06	7.49648e-08	4.88048e-07	5.70047e-08	7.8747e-06
DO224703_CML030T	blood_myeloid	ICGC_WXS_LAML_CN	FALSE	PROF						FALSE	DO224703	0	CML030T	FALSE		2.82515e-06	2.94287e-08	5.73625e-07	5.76795e-09	2.62464e-06
DO224706_CML031T	blood_myeloid	ICGC_WXS_LAML_CN	FALSE	PROF						FALSE	DO224706	0	CML031T	FALSE		3.68392e-06	3.83741e-08	3.30583e-07	2.56694e-08	4.43312e-06
DO224715_CML033T	blood_myeloid	ICGC_WXS_LAML_CN	FALSE	PROF						FALSE	DO224715	0	CML033T	FALSE		4.94242e-06	5.14835e-08	4.88048e-07	3.25025e-08	5.91984e-06
DO224720_CML034T	blood_myeloid	ICGC_WXS_LAML_CN	FALSE	PROF						FALSE	DO224720	0	CML034T	FALSE		1.09549e-05	1.14114e-07	7.7486e-07	8.53856e-08	9.04349e-06
DO224729_CML036T	blood_myeloid	ICGC_WXS_LAML_CN	FALSE	PROF						FALSE	DO224729	0	CML036T	FALSE		8.89881e-06	9.26959e-08	3.30583e-07	8.2353e-08	9.9491e-06
DO224733_CML037T	blood_myeloid	ICGC_WXS_LAML_CN	FALSE	PROF						FALSE	DO224733	0	CML037T	FALSE		1.31289e-05	1.36759e-07	1.31025e-06	8.57379e-08	1.25475e-05
DO224738_CML038T	blood_myeloid	ICGC_WXS_LAML_CN	FALSE	PROF						FALSE	DO224738	0	CML038T	FALSE		1.52805e-05	1.59172e-07	1.88387e-06	8.41852e-08	1.35003e-05
DO224743_CML039T	blood_myeloid	ICGC_WXS_LAML_CN	FALSE	PROF						FALSE	DO224743	0	CML039T	FALSE		7.37007e-06	7.67716e-08	7.7486e-07	4.64199e-08	6.97475e-06
DO224749_CML040T	blood_myeloid	ICGC_WXS_LAML_CN	FALSE	PROF						FALSE	DO224749	0	CML040T	FALSE		8.17158e-06	8.51206e-08	7.78431e-07	5.49766e-08	7.14402e-06
DO224756_CML041T	blood_myeloid	ICGC_WXS_LAML_CN	FALSE	PROF						FALSE	DO224756	0	CML041T	FALSE		1.19888e-05	1.24884e-07	4.88048e-07	1.09094e-07	1.06649e-05
DO224759_CML042T	blood_myeloid	ICGC_WXS_LAML_CN	FALSE	PROF						FALSE	DO224759	0	CML042T	FALSE		6.26293e-06	6.52388e-08	0	6.80753e-08	6.63506e-06
DO224773_CML044T	blood_myeloid	ICGC_WXS_LAML_CN	FALSE	PROF						FALSE	DO224773	0	CML044T	FALSE		6.03436e-06	6.28579e-08	3.30583e-07	5.12177e-08	6.55693e-06
DO224778_CML045T	blood_myeloid	ICGC_WXS_LAML_CN	FALSE	PROF						FALSE	DO224778	0	CML045T	FALSE		1.29688e-05	1.35092e-07	1.95576e-06	5.59322e-08	1.56378e-05
DO224790_CML047T	blood_myeloid	ICGC_WXS_LAML_CN	FALSE	PROF						FALSE	DO224790	0	CML047T	FALSE		6.2491e-06	6.50948e-08	5.73625e-07	4.29848e-08	5.05047e-06
DO224792_CML048T	blood_myeloid	ICGC_WXS_LAML_CN	FALSE	PROF						FALSE	DO224792	0	CML048T	FALSE		6.09192e-06	6.34575e-08	4.88048e-07	4.4997e-08	7.70932e-06
DO224795_CML049T	blood_myeloid	ICGC_WXS_LAML_CN	FALSE	PROF						FALSE	DO224795	0	CML049T	FALSE		2.78828e-06	2.90446e-08	5.73625e-07	5.36723e-09	2.71087e-06
DO224799_CML050T	blood_myeloid	ICGC_WXS_LAML_CN	FALSE	PROF						FALSE	DO224799	0	CML050T	FALSE		3.19803e-06	3.33128e-08	4.88048e-07	1.35417e-08	3.18973e-06
DO224804_CML051T	blood_myeloid	ICGC_WXS_LAML_CN	FALSE	PROF						FALSE	DO224804	0	CML051T	FALSE		8.39043e-06	8.74003e-08	1.06167e-06	4.50407e-08	6.83922e-06
DO224809_CML052T	blood_myeloid	ICGC_WXS_LAML_CN	FALSE	PROF						FALSE	DO224809	0	CML052T	FALSE		4.44035e-06	4.62536e-08	2.86812e-07	3.57945e-08	3.52819e-06
DO224813_CML053T	blood_myeloid	ICGC_WXS_LAML_CN	FALSE	PROF						FALSE	DO224813	0	CML053T	FALSE		2.9801e-06	3.10427e-08	4.88048e-07	1.11729e-08	2.80016e-06
DO224826_CML056T	blood_myeloid	ICGC_WXS_LAML_CN	FALSE	PROF						FALSE	DO224826	0	CML056T	FALSE		2.58501e-06	2.69272e-08	2.86812e-07	1.56278e-08	2.58515e-06
DO224829_CML057T	blood_myeloid	ICGC_WXS_LAML_CN	FALSE	PROF						FALSE	DO224829	0	CML057T	FALSE		5.54518e-06	5.77622e-08	2.86812e-07	4.78035e-08	5.86553e-06
DO224831_CML058T	blood_myeloid	ICGC_WXS_LAML_CN	FALSE	PROF						FALSE	DO224831	0	CML058T	FALSE		7.49055e-06	7.80266e-08	1.4798e-06	1.708e-08	6.08748e-06
DO224834_CML059T	blood_myeloid	ICGC_WXS_LAML_CN	FALSE	PROF						FALSE	DO224834	0	CML059T	FALSE		4.35462e-06	4.53606e-08	2.86812e-07	3.48627e-08	3.98683e-06
DO224846_CML063T	blood_myeloid	ICGC_WXS_LAML_CN	FALSE	PROF						FALSE	DO224846	0	CML063T	FALSE		5.01583e-06	5.22482e-08	9.04208e-07	1.52065e-08	5.12171e-06
DO224907_CML083T	blood_myeloid	ICGC_WXS_LAML_CN	FALSE	PROF						FALSE	DO224907	0	CML083T	FALSE		3.19891e-06	3.3322e-08	4.88048e-07	1.35513e-08	2.65324e-06
DO224908_CML084T	blood_myeloid	ICGC_WXS_LAML_CN	FALSE	PROF						FALSE	DO224908	0	CML084T	FALSE		3.84251e-06	4.00262e-08	2.86812e-07	2.92963e-08	4.16019e-06
DO224913_CML085T	blood_myeloid	ICGC_WXS_LAML_CN	FALSE	PROF						FALSE	DO224913	0	CML085T	FALSE		6.64677e-06	6.92372e-08	1.14921e-06	2.22817e-08	5.42707e-06
DO224916_CML086T	blood_myeloid	ICGC_WXS_LAML_CN	FALSE	PROF						FALSE	DO224916	0	CML086T	FALSE		1.02062e-05	1.06315e-07	1.59706e-06	4.14995e-08	8.30728e-06
DO224919_CML087T	blood_myeloid	ICGC_WXS_LAML_CN	FALSE	PROF						FALSE	DO224919	0	CML087T	FALSE		8.67841e-06	9.04001e-08	5.73625e-07	6.93904e-08	8.96472e-06
DO224922_CML088T	blood_myeloid	ICGC_WXS_LAML_CN	FALSE	PROF						FALSE	DO224922	0	CML088T	FALSE		5.57429e-06	5.80656e-08	1.06167e-06	1.44305e-08	4.95495e-06
DO224924_CML089T	blood_myeloid	ICGC_WXS_LAML_CN	FALSE	PROF						FALSE	DO224924	0	CML089T	FALSE		3.32152e-06	3.45991e-08	2.86812e-07	2.36333e-08	3.11635e-06
DO224926_CML090T	blood_myeloid	ICGC_WXS_LAML_CN	FALSE	PROF						FALSE	DO224926	0	CML090T	FALSE		1.09961e-05	1.14542e-07	1.88387e-06	3.7615e-08	1.1434e-05
DO224931_CML091T	blood_myeloid	ICGC_WXS_LAML_CN	FALSE	PROF						FALSE	DO224931	0	CML091T	FALSE		6.41211e-06	6.67928e-08	1.14921e-06	1.9731e-08	5.61061e-06
DO224933_CML092T	blood_myeloid	ICGC_WXS_LAML_CN	FALSE	PROF						FALSE	DO224933	0	CML092T	FALSE		1.06923e-05	1.11378e-07	1.35206e-06	5.74352e-08	8.72116e-06
DO224935_CML093T	blood_myeloid	ICGC_WXS_LAML_CN	FALSE	PROF						FALSE	DO224935	0	CML093T	FALSE		7.40866e-06	7.71735e-08	1.30668e-06	2.37168e-08	6.07353e-06
DO224940_CML095T	blood_myeloid	ICGC_WXS_LAML_CN	FALSE	PROF						FALSE	DO224940	0	CML095T	FALSE		9.80985e-06	1.02186e-07	1.31025e-06	4.96614e-08	1.11733e-05
DO224945_CML097T	blood_myeloid	ICGC_WXS_LAML_CN	FALSE	PROF						FALSE	DO224945	0	CML097T	FALSE		9.68017e-06	1.00835e-07	1.06524e-06	5.89043e-08	8.80166e-06
DO224949_CML098T	blood_myeloid	ICGC_WXS_LAML_CN	FALSE	PROF						FALSE	DO224949	0	CML098T	FALSE		8.75432e-06	9.11908e-08	9.79667e-07	5.25615e-08	8.17661e-06
DO224952_CML099T	blood_myeloid	ICGC_WXS_LAML_CN	FALSE	PROF						FALSE	DO224952	0	CML099T	FALSE		1.02137e-05	1.06392e-07	1.26648e-06	5.59538e-08	1.05066e-05
DO225399_CN-AML-01-T	blood_myeloid	ICGC_WXS_LAML_KR	FALSE	PROF						FALSE	DO225399	0	CN-AML-01-T	FALSE		1.29621e-05	1.35022e-07	1.96785e-06	5.5334e-08	3.75395e-05
DO225400_CN-AML-03-T	blood_myeloid	ICGC_WXS_LAML_KR	FALSE	PROF						FALSE	DO225400	0	CN-AML-03-T	FALSE		9.57305e-06	9.97192e-08	1.47129e-06	4.00859e-08	4.20868e-05
DO225401_CN-AML-05-T	blood_myeloid	ICGC_WXS_LAML_KR	FALSE	PROF						FALSE	DO225401	0	CN-AML-05-T	FALSE		3.24725e-06	3.38255e-08	0	3.52962e-08	2.61091e-05
DO225402_CN-AML-06-T	blood_myeloid	ICGC_WXS_LAML_KR	FALSE	PROF						FALSE	DO225402	0	CN-AML-06-T	FALSE		3.26875e-05	3.40495e-07	4.16665e-06	1.7414e-07	5.22102e-05
DO225403_CN-AML-07-T	blood_myeloid	ICGC_WXS_LAML_KR	FALSE	PROF						FALSE	DO225403	0	CN-AML-07-T	FALSE		3.54222e-05	3.68981e-07	6.20442e-06	1.15267e-07	7.66441e-05
DO225404_CN-AML-08-T	blood_myeloid	ICGC_WXS_LAML_KR	FALSE	PROF						FALSE	DO225404	0	CN-AML-08-T	FALSE		0.00186935	1.94724e-05	0.000188646	1.2117e-05	0.00286576
DO225405_CN-AML-09-T	blood_myeloid	ICGC_WXS_LAML_KR	FALSE	PROF						FALSE	DO225405	0	CN-AML-09-T	FALSE		1.60237e-05	1.66914e-07	0	1.74171e-07	5.57552e-05
DO225406_CN-AML-10-T	blood_myeloid	ICGC_WXS_LAML_KR	FALSE	PROF						FALSE	DO225406	0	CN-AML-10-T	FALSE		3.22045e-06	3.35464e-08	4.91619e-07	1.36302e-08	3.60361e-05
DO225407_CN-AML-11-T	blood_myeloid	ICGC_WXS_LAML_KR	FALSE	PROF						FALSE	DO225407	0	CN-AML-11-T	FALSE		2.22e-05	2.3125e-07	1.97142e-06	1.55591e-07	7.0284e-05
DO225408_CN-AML-12-T	blood_myeloid	ICGC_WXS_LAML_KR	FALSE	PROF						FALSE	DO225408	0	CN-AML-12-T	FALSE		1.6335e-05	1.70156e-07	1.31025e-06	1.20587e-07	5.86834e-05
DO225409_CN-AML-13-T	blood_myeloid	ICGC_WXS_LAML_KR	FALSE	PROF						FALSE	DO225409	0	CN-AML-13-T	FALSE		2.16454e-05	2.25473e-07	3.23075e-06	9.48089e-08	4.86838e-05
DO225410_CN-AML-14-T	blood_myeloid	ICGC_WXS_LAML_KR	FALSE	PROF						FALSE	DO225410	0	CN-AML-14-T	FALSE		3.276e-06	3.4125e-08	0	3.56087e-08	2.5516e-05
DO225411_CN-AML-15-T	blood_myeloid	ICGC_WXS_LAML_KR	FALSE	PROF						FALSE	DO225411	0	CN-AML-15-T	FALSE		3.44768e-05	3.59133e-07	4.88048e-07	3.53528e-07	6.95422e-05
DO225412_CN-AML-16-T	blood_myeloid	ICGC_WXS_LAML_KR	FALSE	PROF						FALSE	DO225412	0	CN-AML-16-T	FALSE		2.50368e-05	2.608e-07	2.08868e-06	1.81327e-07	6.85722e-05
DO225413_CN-AML-17-T	blood_myeloid	ICGC_WXS_LAML_KR	FALSE	PROF						FALSE	DO225413	0	CN-AML-17-T	FALSE		2.84676e-05	2.96538e-07	3.30425e-06	1.65768e-07	5.75635e-05
DO225414_CN-AML-18-T	blood_myeloid	ICGC_WXS_LAML_KR	FALSE	PROF						FALSE	DO225414	0	CN-AML-18-T	FALSE		1.87743e-05	1.95566e-07	1.77018e-06	1.27104e-07	5.40908e-05
DO225415_CN-AML-19-T	blood_myeloid	ICGC_WXS_LAML_KR	FALSE	PROF						FALSE	DO225415	0	CN-AML-19-T	FALSE		2.9809e-05	3.10511e-07	2.86711e-06	1.99354e-07	6.64802e-05
DO225416_CN-AML-20-T	blood_myeloid	ICGC_WXS_LAML_KR	FALSE	PROF						FALSE	DO225416	0	CN-AML-20-T	FALSE		8.77511e-06	9.14074e-08	6.17396e-07	6.85383e-08	2.78711e-05
DO225417_CN-AML-21-T	blood_myeloid	ICGC_WXS_LAML_KR	FALSE	PROF						FALSE	DO225417	0	CN-AML-21-T	FALSE		1.2928e-05	1.34667e-07	6.61167e-07	1.11775e-07	4.98464e-05
DO225418_CN-AML-22-T	blood_myeloid	ICGC_WXS_LAML_KR	FALSE	PROF						FALSE	DO225418	0	CN-AML-22-T	FALSE		2.35943e-05	2.45773e-07	2.8162e-06	1.34016e-07	5.90925e-05
DO225419_CN-AML-23-T	blood_myeloid	ICGC_WXS_LAML_KR	FALSE	PROF						FALSE	DO225419	0	CN-AML-23-T	FALSE		1.47584e-05	1.53733e-07	9.04208e-07	1.21104e-07	7.65995e-05
DO225420_CN-AML-24-T	blood_myeloid	ICGC_WXS_LAML_KR	FALSE	PROF						FALSE	DO225420	0	CN-AML-24-T	FALSE		3.00595e-05	3.1312e-07	2.45589e-06	2.19956e-07	8.47705e-05
DO225421_CN-AML-25-T	blood_myeloid	ICGC_WXS_LAML_KR	FALSE	PROF						FALSE	DO225421	0	CN-AML-25-T	FALSE		2.65289e-05	2.76342e-07	2.41569e-06	1.83327e-07	6.109e-05
DO225422_CN-AML-26-T	blood_myeloid	ICGC_WXS_LAML_KR	FALSE	PROF						FALSE	DO225422	0	CN-AML-26-T	FALSE		1.16788e-05	1.21655e-07	7.7486e-07	9.32544e-08	4.2708e-05
DO225423_CN-AML-27-T	blood_myeloid	ICGC_WXS_LAML_KR	FALSE	PROF						FALSE	DO225423	0	CN-AML-27-T	FALSE		1.75778e-05	1.83103e-07	2.13245e-06	9.83482e-08	4.40134e-05
DO225424_CN-AML-28-T	blood_myeloid	ICGC_WXS_LAML_KR	FALSE	PROF						FALSE	DO225424	0	CN-AML-28-T	FALSE		1.16893e-05	1.21763e-07	8.18631e-07	9.14644e-08	2.86731e-05
DO225425_CN-AML-29-T	blood_myeloid	ICGC_WXS_LAML_KR	FALSE	PROF						FALSE	DO225425	0	CN-AML-29-T	FALSE		1.77966e-05	1.85381e-07	1.19102e-06	1.41658e-07	4.81601e-05
DO225426_CN-AML-30-T	blood_myeloid	ICGC_WXS_LAML_KR	FALSE	PROF						FALSE	DO225426	0	CN-AML-30-T	FALSE		1.00809e-05	1.05009e-07	1.26291e-06	5.46655e-08	3.23704e-05
DO225427_CN-AML-31-T	blood_myeloid	ICGC_WXS_LAML_KR	FALSE	PROF						FALSE	DO225427	0	CN-AML-31-T	FALSE		1.0298e-05	1.07271e-07	1.06524e-06	6.56196e-08	3.28858e-05
DO225428_CN-AML-32-T	blood_myeloid	ICGC_WXS_LAML_KR	FALSE	PROF						FALSE	DO225428	0	CN-AML-32-T	FALSE		2.2884e-05	2.38375e-07	3.72237e-06	8.68965e-08	4.03899e-05
DO225429_CN-AML-33-T	blood_myeloid	ICGC_WXS_LAML_KR	FALSE	PROF						FALSE	DO225429	0	CN-AML-33-T	FALSE		2.42428e-05	2.52529e-07	2.08868e-06	1.72696e-07	6.30758e-05
DO225430_CN-AML-34-T	blood_myeloid	ICGC_WXS_LAML_KR	FALSE	PROF						FALSE	DO225430	0	CN-AML-34-T	FALSE		2.83869e-05	2.95697e-07	2.86711e-06	1.83896e-07	6.36107e-05
DO225431_CN-AML-35-T	blood_myeloid	ICGC_WXS_LAML_KR	FALSE	PROF						FALSE	DO225431	0	CN-AML-35-T	FALSE		4.7433e-06	4.94094e-08	6.17396e-07	2.47143e-08	1.99275e-05
DO225432_CN-AML-36-T	blood_myeloid	ICGC_WXS_LAML_KR	FALSE	PROF						FALSE	DO225432	0	CN-AML-36-T	FALSE		1.29549e-05	1.34946e-07	7.78431e-07	1.06969e-07	7.65387e-05
DO225433_CN-AML-37-T	blood_myeloid	ICGC_WXS_LAML_KR	FALSE	PROF						FALSE	DO225433	0	CN-AML-37-T	FALSE		1.58091e-05	1.64678e-07	1.4396e-06	1.09246e-07	3.76325e-05
DO225434_CN-AML-38-T	blood_myeloid	ICGC_WXS_LAML_KR	FALSE	PROF						FALSE	DO225434	0	CN-AML-38-T	FALSE		1.17845e-05	1.22755e-07	1.26648e-06	7.30279e-08	4.25434e-05
DO225435_CN-AML-39-T	blood_myeloid	ICGC_WXS_LAML_KR	FALSE	PROF						FALSE	DO225435	0	CN-AML-39-T	FALSE		3.211e-05	3.34479e-07	4.21756e-06	1.6565e-07	7.08617e-05
DO225436_CN-AML-45-T	blood_myeloid	ICGC_WXS_LAML_KR	FALSE	PROF						FALSE	DO225436	0	CN-AML-45-T	FALSE		1.79283e-05	1.86753e-07	1.7983e-06	1.16686e-07	4.47965e-05
DO225437_CN-AML-46-T	blood_myeloid	ICGC_WXS_LAML_KR	FALSE	PROF						FALSE	DO225437	0	CN-AML-46-T	FALSE		1.46879e-05	1.52998e-07	1.46771e-06	9.58369e-08	4.70788e-05
DO225438_CN-AML-47-T	blood_myeloid	ICGC_WXS_LAML_KR	FALSE	PROF						FALSE	DO225438	0	CN-AML-47-T	FALSE		1.89626e-05	1.97527e-07	2.24615e-06	1.08457e-07	6.22724e-05
DO228005_Pros_WES_01_DX	blood_myeloid	ICGC_WXS_LAML_KR	FALSE	PROF						FALSE	DO228005	0	Pros_WES_01_DX	FALSE		7.2098e-06	7.51021e-08	2.86812e-07	6.58973e-08	8.61816e-05
DO228006_Pros_WES_02_DX	blood_myeloid	ICGC_WXS_LAML_KR	FALSE	PROF						FALSE	DO228006	0	Pros_WES_02_DX	FALSE		1.96163e-05	2.04337e-07	1.23479e-06	1.59534e-07	0.000122937
DO228007_Pros_WES_03_DX	blood_myeloid	ICGC_WXS_LAML_KR	FALSE	PROF						FALSE	DO228007	0	Pros_WES_03_DX	FALSE		9.79094e-06	1.01989e-07	1.26648e-06	5.13589e-08	9.49069e-05
DO228008_Pros_WES_04_DX	blood_myeloid	ICGC_WXS_LAML_KR	FALSE	PROF						FALSE	DO228008	0	Pros_WES_04_DX	FALSE		7.46542e-05	7.77648e-07	3.97613e-06	6.38584e-07	0.000170132
DO228009_Pros_WES_05_DX	blood_myeloid	ICGC_WXS_LAML_KR	FALSE	PROF						FALSE	DO228009	0	Pros_WES_05_DX	FALSE		3.41413e-05	3.55638e-07	3.96541e-06	1.98691e-07	0.000134028
DO229473_pros_01_dx	blood_myeloid	ICGC_WXS_LAML_KR	FALSE	PROF						FALSE	DO229473	0	pros_01_dx	FALSE		0.000406555	4.23495e-06	4.60811e-05	2.41555e-06	0.000551135
DO229480_pros_02_dx	blood_myeloid	ICGC_WXS_LAML_KR	FALSE	PROF						FALSE	DO229480	0	pros_02_dx	FALSE		0.00512316	5.33662e-05	0.000534699	3.24387e-05	0.00666916
DO229486_pros_03_dx	blood_myeloid	ICGC_WXS_LAML_KR	FALSE	PROF						FALSE	DO229486	0	pros_03_dx	FALSE		3.46488e-05	3.60925e-07	4.74027e-06	1.70518e-07	0.000142293
DO229489_pros_04_dx	blood_myeloid	ICGC_WXS_LAML_KR	FALSE	PROF						FALSE	DO229489	0	pros_04_dx	FALSE		0.00447718	4.66373e-05	0.000445231	2.93071e-05	0.0062439
DO229493_pros_05_dx	blood_myeloid	ICGC_WXS_LAML_KR	FALSE	PROF						FALSE	DO229493	0	pros_05_dx	FALSE		0.000483813	5.03972e-06	2.5083e-05	4.16827e-06	0.000623292
DO229496_pros_06_dx	blood_myeloid	ICGC_WXS_LAML_KR	FALSE	PROF						FALSE	DO229496	0	pros_06_dx	FALSE		0.000663559	6.91207e-06	3.08686e-05	5.87048e-06	0.00676156
DO229501_pros_07_dx	blood_myeloid	ICGC_WXS_LAML_KR	FALSE	PROF						FALSE	DO229501	0	pros_07_dx	FALSE		5.91526e-05	6.16173e-07	6.89888e-06	3.43012e-07	0.000158626
DO229505_pros_08_dx	blood_myeloid	ICGC_WXS_LAML_KR	FALSE	PROF						FALSE	DO229505	0	pros_08_dx	FALSE		0.00805951	8.39532e-05	0.00082868	5.15738e-05	0.0102213
DO229508_pros_09_dx	blood_myeloid	ICGC_WXS_LAML_KR	FALSE	PROF						FALSE	DO229508	0	pros_09_dx	FALSE		1.7834e-05	1.85771e-07	1.79473e-06	1.15816e-07	9.00718e-05
DO229512_pros_10_dx	blood_myeloid	ICGC_WXS_LAML_KR	FALSE	PROF						FALSE	DO229512	0	pros_10_dx	FALSE		0.000561045	5.84422e-06	2.70415e-05	4.9226e-06	0.00558271
DO231081_2014_SWES_01_DX	blood_myeloid	ICGC_WXS_LAML_KR	FALSE	PROF						FALSE	DO231081	0	2014_SWES_01_DX	FALSE		6.80655e-06	7.09016e-08	4.88048e-07	5.27648e-08	5.52727e-05
DO231090_2014_SWES_02_DX	blood_myeloid	ICGC_WXS_LAML_KR	FALSE	PROF						FALSE	DO231090	0	2014_SWES_02_DX	FALSE		1.41984e-05	1.479e-07	1.80187e-06	7.59879e-08	5.71188e-05
DO231093_2014_SWES_03_DX	blood_myeloid	ICGC_WXS_LAML_KR	FALSE	PROF						FALSE	DO231093	0	2014_SWES_03_DX	FALSE		3.93503e-06	4.09899e-08	2.86812e-07	3.0302e-08	6.25634e-05
DO231098_2014_SWES_04_DX	blood_myeloid	ICGC_WXS_LAML_KR	FALSE	PROF						FALSE	DO231098	0	2014_SWES_04_DX	FALSE		9.42731e-06	9.82011e-08	9.79667e-07	5.98765e-08	8.21147e-05
DO231101_2014_SWES_05_DX	blood_myeloid	ICGC_WXS_LAML_KR	FALSE	PROF						FALSE	DO231101	0	2014_SWES_05_DX	FALSE		6.02759e-05	6.27874e-07	5.48208e-06	4.16822e-07	0.000177682
DO231108_2014_SWES_06_DX	blood_myeloid	ICGC_WXS_LAML_KR	FALSE	PROF						FALSE	DO231108	0	2014_SWES_06_DX	FALSE		1.48903e-05	1.55107e-07	9.79667e-07	1.19256e-07	8.76467e-05
DO231113_2014_SWES_07_DX	blood_myeloid	ICGC_WXS_LAML_KR	FALSE	PROF						FALSE	DO231113	0	2014_SWES_07_DX	FALSE		1.09238e-05	1.1379e-07	1.92407e-06	3.5082e-08	3.99686e-05
DO231117_2014_SWES_08_DX	blood_myeloid	ICGC_WXS_LAML_KR	FALSE	PROF						FALSE	DO231117	0	2014_SWES_08_DX	FALSE		2.26328e-05	2.35759e-07	2.41926e-06	1.40823e-07	9.27344e-05
DO231123_2014_SWES_09_DX	blood_myeloid	ICGC_WXS_LAML_KR	FALSE	PROF						FALSE	DO231123	0	2014_SWES_09_DX	FALSE		2.20363e-05	2.29544e-07	2.85997e-06	1.15178e-07	9.49189e-05
DO231129_2014_SWES_10_DX	blood_myeloid	ICGC_WXS_LAML_KR	FALSE	PROF						FALSE	DO231129	0	2014_SWES_10_DX	FALSE		2.60482e-05	2.71336e-07	2.45946e-06	1.762e-07	9.4513e-05
DO231134_2014_SWES_11_DX	blood_myeloid	ICGC_WXS_LAML_KR	FALSE	PROF						FALSE	DO231134	0	2014_SWES_11_DX	FALSE		1.86353e-05	1.94117e-07	2.34023e-06	1.00808e-07	8.79085e-05
DO231138_2014_SWES_12_DX	blood_myeloid	ICGC_WXS_LAML_KR	FALSE	PROF						FALSE	DO231138	0	2014_SWES_12_DX	FALSE		1.0376e-05	1.08083e-07	9.04208e-07	7.34688e-08	9.54025e-05
DO231140_2014_SWES_13_DX	blood_myeloid	ICGC_WXS_LAML_KR	FALSE	PROF						FALSE	DO231140	0	2014_SWES_13_DX	FALSE		0.00527435	5.49411e-05	0.000497007	3.57209e-05	0.00849067
DO231144_2014_SWES_14_DX	blood_myeloid	ICGC_WXS_LAML_KR	FALSE	PROF						FALSE	DO231144	0	2014_SWES_14_DX	FALSE		1.16169e-05	1.2101e-07	4.88048e-07	1.05051e-07	7.07775e-05
DO231147_2014_SWES_15_DX	blood_myeloid	ICGC_WXS_LAML_KR	FALSE	PROF						FALSE	DO231147	0	2014_SWES_15_DX	FALSE		2.24795e-05	2.34161e-07	3.27256e-06	1.02057e-07	0.000100758
DO231150_2014_SWES_16_DX	blood_myeloid	ICGC_WXS_LAML_KR	FALSE	PROF						FALSE	DO231150	0	2014_SWES_16_DX	FALSE		9.83581e-06	1.02456e-07	3.30583e-07	9.25378e-08	5.44427e-05
DO231154_2014_SWES_17_DX	blood_myeloid	ICGC_WXS_LAML_KR	FALSE	PROF						FALSE	DO231154	0	2014_SWES_17_DX	FALSE		9.60962e-06	1.001e-07	3.30583e-07	9.00792e-08	7.82706e-05
DO231159_2014_SWES_18_DX	blood_myeloid	ICGC_WXS_LAML_KR	FALSE	PROF						FALSE	DO231159	0	2014_SWES_18_DX	FALSE		1.97769e-05	2.0601e-07	2.21446e-06	1.18686e-07	9.37013e-05
DO231161_2014_SWES_19_DX	blood_myeloid	ICGC_WXS_LAML_KR	FALSE	PROF						FALSE	DO231161	0	2014_SWES_19_DX	FALSE		1.2948e-05	1.34875e-07	4.88048e-07	1.1952e-07	5.81048e-05
DO231166_2014_SWES_20_DX	blood_myeloid	ICGC_WXS_LAML_KR	FALSE	PROF						FALSE	DO231166	0	2014_SWES_20_DX	FALSE		1.86456e-05	1.94225e-07	1.39583e-06	1.41982e-07	9.21743e-05
DO231171_2014_SWES_21_DX	blood_myeloid	ICGC_WXS_LAML_KR	FALSE	PROF						FALSE	DO231171	0	2014_SWES_21_DX	FALSE		1.48465e-05	1.54651e-07	9.9175e-07	1.18255e-07	8.19678e-05
DO231175_2014_SWES_22_DX	blood_myeloid	ICGC_WXS_LAML_KR	FALSE	PROF						FALSE	DO231175	0	2014_SWES_22_DX	FALSE		2.06497e-05	2.15101e-07	6.61167e-07	1.95707e-07	5.702e-05
DO231180_2014_SWES_23_DX	blood_myeloid	ICGC_WXS_LAML_KR	FALSE	PROF						FALSE	DO231180	0	2014_SWES_23_DX	FALSE		2.67376e-05	2.78516e-07	4.25223e-06	1.05747e-07	0.000103706
DO231184_2014_SWES_24_DX	blood_myeloid	ICGC_WXS_LAML_KR	FALSE	PROF						FALSE	DO231184	0	2014_SWES_24_DX	FALSE		1.8595e-05	1.93698e-07	2.21446e-06	1.05838e-07	8.23958e-05
DO231188_2014_SWES_25_DX	blood_myeloid	ICGC_WXS_LAML_KR	FALSE	PROF						FALSE	DO231188	0	2014_SWES_25_DX	FALSE		8.33461e-06	8.68188e-08	7.78431e-07	5.67487e-08	6.23672e-05
DO231193_2014_SWES_26_DX	blood_myeloid	ICGC_WXS_LAML_KR	FALSE	PROF						FALSE	DO231193	0	2014_SWES_26_DX	FALSE		1.71722e-05	1.78877e-07	8.18631e-07	1.51062e-07	0.000121436
DO231198_2014_SWES_27_DX	blood_myeloid	ICGC_WXS_LAML_KR	FALSE	PROF						FALSE	DO231198	0	2014_SWES_27_DX	FALSE		2.80492e-05	2.9218e-07	4.05653e-06	1.28512e-07	0.000114579
DO231202_2014_SWES_28_DX	blood_myeloid	ICGC_WXS_LAML_KR	FALSE	PROF						FALSE	DO231202	0	2014_SWES_28_DX	FALSE		1.40475e-05	1.46328e-07	1.75453e-06	7.6406e-08	9.26848e-05
DO231206_2014_SWES_29_DX	blood_myeloid	ICGC_WXS_LAML_KR	FALSE	PROF						FALSE	DO231206	0	2014_SWES_29_DX	FALSE		8.9697e-06	9.34344e-08	9.76095e-07	5.50578e-08	5.33135e-05
DO231211_2014_SWES_30_DX	blood_myeloid	ICGC_WXS_LAML_KR	FALSE	PROF						FALSE	DO231211	0	2014_SWES_30_DX	FALSE		2.68793e-05	2.79993e-07	1.10544e-06	2.44104e-07	0.00013134
DO231214_2014_SWES_31_DX	blood_myeloid	ICGC_WXS_LAML_KR	FALSE	PROF						FALSE	DO231214	0	2014_SWES_31_DX	FALSE		1.59225e-05	1.65859e-07	9.79667e-07	1.30476e-07	6.89776e-05
DO231215_2014_SWES_32_DX	blood_myeloid	ICGC_WXS_LAML_KR	FALSE	PROF						FALSE	DO231215	0	2014_SWES_32_DX	FALSE		4.02383e-05	4.19149e-07	5.73625e-07	4.12433e-07	9.49314e-05
DO231218_2014_SWES_33_DX	blood_myeloid	ICGC_WXS_LAML_KR	FALSE	PROF						FALSE	DO231218	0	2014_SWES_33_DX	FALSE		1.55357e-05	1.6183e-07	1.46771e-06	1.05053e-07	6.60997e-05
DO231220_2014_SWES_34_DX	blood_myeloid	ICGC_WXS_LAML_KR	FALSE	PROF						FALSE	DO231220	0	2014_SWES_34_DX	FALSE		3.04861e-05	3.17563e-07	3.68217e-06	1.71276e-07	0.000114478
DO231223_2014_SWES_35_DX	blood_myeloid	ICGC_WXS_LAML_KR	FALSE	PROF						FALSE	DO231223	0	2014_SWES_35_DX	FALSE		6.03142e-05	6.28272e-07	5.14632e-06	4.31836e-07	0.000132243
DO231226_2014_SWES_36_DX	blood_myeloid	ICGC_WXS_LAML_KR	FALSE	PROF						FALSE	DO231226	0	2014_SWES_36_DX	FALSE		2.31929e-05	2.41592e-07	2.74628e-06	1.32693e-07	0.00010073
DO231230_2014_SWES_37_DX	blood_myeloid	ICGC_WXS_LAML_KR	FALSE	PROF						FALSE	DO231230	0	2014_SWES_37_DX	FALSE		5.30419e-06	5.52519e-08	0	5.76542e-08	7.00162e-05
DO231233_2014_SWES_38_DX	blood_myeloid	ICGC_WXS_LAML_KR	FALSE	PROF						FALSE	DO231233	0	2014_SWES_38_DX	FALSE		1.85934e-05	1.93681e-07	1.77018e-06	1.25138e-07	8.92797e-05
DO231235_2014_SWES_39_DX	blood_myeloid	ICGC_WXS_LAML_KR	FALSE	PROF						FALSE	DO231235	0	2014_SWES_39_DX	FALSE		1.76046e-05	1.83381e-07	1.31025e-06	1.34387e-07	8.60903e-05
DO231239_2014_SWES_40_DX	blood_myeloid	ICGC_WXS_LAML_KR	FALSE	PROF						FALSE	DO231239	0	2014_SWES_40_DX	FALSE		1.44452e-05	1.50471e-07	8.18631e-07	1.21421e-07	0.000172864
DO231243_2014_SWES_41_DX	blood_myeloid	ICGC_WXS_LAML_KR	FALSE	PROF						FALSE	DO231243	0	2014_SWES_41_DX	FALSE		5.00419e-05	5.2127e-07	6.58234e-06	2.57745e-07	0.000112364
DO231248_2014_SWES_42_DX	blood_myeloid	ICGC_WXS_LAML_KR	FALSE	PROF						FALSE	DO231248	0	2014_SWES_42_DX	FALSE		4.37202e-05	4.55419e-07	6.8763e-06	1.7625e-07	8.40082e-05
DO231255_2014_SWES_43_DX	blood_myeloid	ICGC_WXS_LAML_KR	FALSE	PROF						FALSE	DO231255	0	2014_SWES_43_DX	FALSE		2.65336e-05	2.76392e-07	3.02101e-06	1.57061e-07	9.31199e-05
DO231260_2014_SWES_44_DX	blood_myeloid	ICGC_WXS_LAML_KR	FALSE	PROF						FALSE	DO231260	0	2014_SWES_44_DX	FALSE		2.17068e-05	2.26113e-07	1.64083e-06	1.64603e-07	9.4126e-05
DO231265_2014_SWES_45_DX	blood_myeloid	ICGC_WXS_LAML_KR	FALSE	PROF						FALSE	DO231265	0	2014_SWES_45_DX	FALSE		2.6477e-05	2.75802e-07	3.48094e-06	1.36448e-07	7.01756e-05
DO231268_2014_SWES_47_DX	blood_myeloid	ICGC_WXS_LAML_KR	FALSE	PROF						FALSE	DO231268	0	2014_SWES_47_DX	FALSE		4.51929e-05	4.70759e-07	6.7535e-06	1.97597e-07	8.44429e-05
DO231271_2014_SWES_48_DX	blood_myeloid	ICGC_WXS_LAML_KR	FALSE	PROF						FALSE	DO231271	0	2014_SWES_48_DX	FALSE		3.27935e-05	3.41599e-07	2.78808e-06	2.3523e-07	0.000116051
DO231275_2014_SWES_49_DX	blood_myeloid	ICGC_WXS_LAML_KR	FALSE	PROF						FALSE	DO231275	0	2014_SWES_49_DX	FALSE		1.36114e-05	1.41786e-07	1.68264e-06	7.47921e-08	9.05764e-05
DO231281_2014_SWES_50_DX	blood_myeloid	ICGC_WXS_LAML_KR	FALSE	PROF						FALSE	DO231281	0	2014_SWES_50_DX	FALSE		7.8618e-06	8.18937e-08	2.86812e-07	7.29842e-08	8.95571e-05
DO231287_2014_SWES_51_DX	blood_myeloid	ICGC_WXS_LAML_KR	FALSE	PROF						FALSE	DO231287	0	2014_SWES_51_DX	FALSE		1.92963e-05	2.01003e-07	0	2.09742e-07	0.000100504
DO231293_2014_SWES_52_DX	blood_myeloid	ICGC_WXS_LAML_KR	FALSE	PROF						FALSE	DO231293	0	2014_SWES_52_DX	FALSE		2.1499e-05	2.23948e-07	1.97142e-06	1.47971e-07	0.000108742
DO50977_CN-AML-CR-1-Dx	blood_myeloid	ICGC_WXS_LAML_KR	FALSE	PROF						FALSE	DO50977	0	CN-AML-CR-1-Dx	FALSE		7.82646e-05	8.15257e-07	5.73917e-06	6.01174e-07	0.000420115
DO50978_CN-AML-CR-2-Dx	blood_myeloid	ICGC_WXS_LAML_KR	FALSE	PROF						FALSE	DO50978	0	CN-AML-CR-2-Dx	FALSE		4.4272e-05	4.61166e-07	2.58328e-06	3.68901e-07	0.000419233
DO50979_CN-AML-CR-3-Dx	blood_myeloid	ICGC_WXS_LAML_KR	FALSE	PROF						FALSE	DO50979	0	CN-AML-CR-3-Dx	FALSE		3.05241e-05	3.17959e-07	9.47979e-07	2.90567e-07	0.000352854
DO50980_CN-AML-CR-4-Dx	blood_myeloid	ICGC_WXS_LAML_KR	FALSE	PROF						FALSE	DO50980	0	CN-AML-CR-4-Dx	FALSE		7.09224e-05	7.38775e-07	4.00918e-06	5.96584e-07	0.000426873
DO50981_CN-AML-CR-5-Dx	blood_myeloid	ICGC_WXS_LAML_KR	FALSE	PROF						FALSE	DO50981	0	CN-AML-CR-5-Dx	FALSE		7.59294e-05	7.90931e-07	8.76017e-06	4.44442e-07	0.000458225
DO50982_CN-AML-CR-6-Dx	blood_myeloid	ICGC_WXS_LAML_KR	FALSE	PROF						FALSE	DO50982	0	CN-AML-CR-6-Dx	FALSE		8.02034e-05	8.35452e-07	8.49062e-06	5.02618e-07	0.000422146
DO50983_CN-AML-CR-7-Dx	blood_myeloid	ICGC_WXS_LAML_KR	FALSE	PROF						FALSE	DO50983	0	CN-AML-CR-7-Dx	FALSE		8.20759e-05	8.54958e-07	8.19667e-06	5.35753e-07	0.000466022
DO50984_CN-AML-CR-8-Dx	blood_myeloid	ICGC_WXS_LAML_KR	FALSE	PROF						FALSE	DO50984	0	CN-AML-CR-8-Dx	FALSE		6.72889e-05	7.00926e-07	4.32411e-06	5.43396e-07	0.000445657
DO50985_CN-AML-CR-9-Dx	blood_myeloid	ICGC_WXS_LAML_KR	FALSE	PROF						FALSE	DO50985	0	CN-AML-CR-9-Dx	FALSE		5.15106e-05	5.36568e-07	1.80187e-06	4.81555e-07	0.000349036
DO50986_CN-AML-CR-10-Dx	blood_myeloid	ICGC_WXS_LAML_KR	FALSE	PROF						FALSE	DO50986	0	CN-AML-CR-10-Dx	FALSE		5.92696e-05	6.17391e-07	2.67082e-06	5.28112e-07	0.00042748
DO50987_CN-AML-CR-11-Dx	blood_myeloid	ICGC_WXS_LAML_KR	FALSE	PROF						FALSE	DO50987	0	CN-AML-CR-11-Dx	FALSE		5.41938e-05	5.64519e-07	3.15035e-06	4.52091e-07	0.000409795
DO50988_CN-AML-CR-13-Dx	blood_myeloid	ICGC_WXS_LAML_KR	FALSE	PROF						FALSE	DO50988	0	CN-AML-CR-13-Dx	FALSE		5.24697e-05	5.4656e-07	5.73917e-06	3.20794e-07	0.000402336
DO50989_CN-AML-CR-14-Dx	blood_myeloid	ICGC_WXS_LAML_KR	FALSE	PROF						FALSE	DO50989	0	CN-AML-CR-14-Dx	FALSE		6.16589e-05	6.42281e-07	5.50464e-06	4.30874e-07	0.000432249
DO50990_CN-AML-CR-15-Dx	blood_myeloid	ICGC_WXS_LAML_KR	FALSE	PROF						FALSE	DO50990	0	CN-AML-CR-15-Dx	FALSE		3.78475e-05	3.94245e-07	4.0199e-06	2.36608e-07	0.000336017
DO50991_CN-AML-CR-16-Dx	blood_myeloid	ICGC_WXS_LAML_KR	FALSE	PROF						FALSE	DO50991	0	CN-AML-CR-16-Dx	FALSE		7.63284e-05	7.95088e-07	6.30922e-06	5.55343e-07	0.00044816
DO50992_CN-AML-CR-17-Dx	blood_myeloid	ICGC_WXS_LAML_KR	FALSE	PROF						FALSE	DO50992	0	CN-AML-CR-17-Dx	FALSE		6.65859e-05	6.93603e-07	3.72951e-06	5.61607e-07	0.000413478
DO50993_CN-AML-CR-18-Dx	blood_myeloid	ICGC_WXS_LAML_KR	FALSE	PROF						FALSE	DO50993	0	CN-AML-CR-18-Dx	FALSE		7.04425e-05	7.33776e-07	7.78902e-06	4.27027e-07	0.000464106
DO50994_CN-AML-CR-19-Dx	blood_myeloid	ICGC_WXS_LAML_KR	FALSE	PROF						FALSE	DO50994	0	CN-AML-CR-19-Dx	FALSE		6.82055e-05	7.10474e-07	7.24708e-06	4.26273e-07	0.000419497
DO50995_CN-AML-CR-20-Dx	blood_myeloid	ICGC_WXS_LAML_KR	FALSE	PROF						FALSE	DO50995	0	CN-AML-CR-20-Dx	FALSE		4.83063e-05	5.03191e-07	2.86354e-06	4.00567e-07	0.000483318
DO50996_CN-AML-CR-21-Dx	blood_myeloid	ICGC_WXS_LAML_KR	FALSE	PROF						FALSE	DO50996	0	CN-AML-CR-21-Dx	FALSE		6.95831e-05	7.24824e-07	5.40305e-06	5.21423e-07	0.000455012
DO50997_CN-AML-CR-22-Dx	blood_myeloid	ICGC_WXS_LAML_KR	FALSE	PROF						FALSE	DO50997	0	CN-AML-CR-22-Dx	FALSE		5.3175e-05	5.53906e-07	3.65048e-06	4.19272e-07	0.000373825
DO50998_CN-AML-CR-23-Dx	blood_myeloid	ICGC_WXS_LAML_KR	FALSE	PROF						FALSE	DO50998	0	CN-AML-CR-23-Dx	FALSE		4.95986e-05	5.16652e-07	3.52114e-06	3.86022e-07	0.000404169
DO50999_CN-AML-CR-24-Dx	blood_myeloid	ICGC_WXS_LAML_KR	FALSE	PROF						FALSE	DO50999	0	CN-AML-CR-24-Dx	FALSE		6.43954e-05	6.70785e-07	5.35767e-06	4.67008e-07	0.000414211
DO51000_CN-AML-CR-25-Dx	blood_myeloid	ICGC_WXS_LAML_KR	FALSE	PROF						FALSE	DO51000	0	CN-AML-CR-25-Dx	FALSE		4.53933e-05	4.72847e-07	3.72041e-06	3.31648e-07	0.000368209
DO51001_CN-AML-CR-26-Dx	blood_myeloid	ICGC_WXS_LAML_KR	FALSE	PROF						FALSE	DO51001	0	CN-AML-CR-26-Dx	FALSE		5.33564e-05	5.55795e-07	3.39893e-06	4.32181e-07	0.00042817
DO51002_CN-AML-CR-27-Dx	blood_myeloid	ICGC_WXS_LAML_KR	FALSE	PROF						FALSE	DO51002	0	CN-AML-CR-27-Dx	FALSE		5.39931e-05	5.62428e-07	4.95222e-06	3.71567e-07	0.000464381
DO51003_CN-AML-CR-28-Dx	blood_myeloid	ICGC_WXS_LAML_KR	FALSE	PROF						FALSE	DO51003	0	CN-AML-CR-28-Dx	FALSE		6.54116e-05	6.81371e-07	3.96541e-06	5.38586e-07	0.000468895
DO51004_CN-AML-CR-29-Dx	blood_myeloid	ICGC_WXS_LAML_KR	FALSE	PROF						FALSE	DO51004	0	CN-AML-CR-29-Dx	FALSE		8.83931e-05	9.20761e-07	5.39293e-06	7.26319e-07	0.000492197
DO51005_CN-AML-CR-30-Dx	blood_myeloid	ICGC_WXS_LAML_KR	FALSE	PROF						FALSE	DO51005	0	CN-AML-CR-30-Dx	FALSE		8.98107e-05	9.35528e-07	7.99025e-06	6.288e-07	0.000514706
DO51006_CN-AML-CR-31-Dx	blood_myeloid	ICGC_WXS_LAML_KR	FALSE	PROF						FALSE	DO51006	0	CN-AML-CR-31-Dx	FALSE		3.94217e-05	4.10643e-07	3.23432e-06	2.87874e-07	0.000386013
DO51007_CN-AML-CR-32-Dx	blood_myeloid	ICGC_WXS_LAML_KR	FALSE	PROF						FALSE	DO51007	0	CN-AML-CR-32-Dx	FALSE		4.70456e-05	4.90059e-07	2.65516e-06	3.95924e-07	0.000430338
DO51008_CN-AML-CR-33-Dx	blood_myeloid	ICGC_WXS_LAML_KR	FALSE	PROF						FALSE	DO51008	0	CN-AML-CR-33-Dx	FALSE		5.38691e-05	5.61136e-07	4.33977e-06	3.96848e-07	0.000455316
DO51009_CN-AML-CR-34-Dx	blood_myeloid	ICGC_WXS_LAML_KR	FALSE	PROF						FALSE	DO51009	0	CN-AML-CR-34-Dx	FALSE		5.82353e-05	6.06617e-07	5.65162e-06	3.87269e-07	0.000422701
DO51010_CN-AML-CR-35-Dx	blood_myeloid	ICGC_WXS_LAML_KR	FALSE	PROF						FALSE	DO51010	0	CN-AML-CR-35-Dx	FALSE		3.48271e-05	3.62783e-07	2.65873e-06	2.62959e-07	0.000338822
DO51011_CN-AML-CR-36-Dx	blood_myeloid	ICGC_WXS_LAML_KR	FALSE	PROF						FALSE	DO51011	0	CN-AML-CR-36-Dx	FALSE		5.54483e-05	5.77587e-07	4.99242e-06	3.85637e-07	0.000434046
DO51012_CN-AML-CR-37-Dx	blood_myeloid	ICGC_WXS_LAML_KR	FALSE	PROF						FALSE	DO51012	0	CN-AML-CR-37-Dx	FALSE		6.54374e-05	6.8164e-07	6.16065e-06	4.43422e-07	0.000430512
DO51013_CN-AML-CR-38-Dx	blood_myeloid	ICGC_WXS_LAML_KR	FALSE	PROF						FALSE	DO51013	0	CN-AML-CR-38-Dx	FALSE		3.97235e-05	4.13787e-07	2.82828e-06	3.08808e-07	0.000437416
DO51014_CN-AML-CR-39-Dx	blood_myeloid	ICGC_WXS_LAML_KR	FALSE	PROF						FALSE	DO51014	0	CN-AML-CR-39-Dx	FALSE		3.98764e-05	4.15379e-07	3.73249e-06	2.71157e-07	0.000363802
DO51015_CN-AML-CR-40-Dx	blood_myeloid	ICGC_WXS_LAML_KR	FALSE	PROF						FALSE	DO51015	0	CN-AML-CR-40-Dx	FALSE		6.30247e-05	6.56508e-07	6.55226e-06	4.00171e-07	0.000439521
DO51016_CN-AML-CR-41-Dx	blood_myeloid	ICGC_WXS_LAML_KR	FALSE	PROF						FALSE	DO51016	0	CN-AML-CR-41-Dx	FALSE		7.26607e-05	7.56882e-07	5.7372e-06	5.40347e-07	0.000448946
DO51017_CN-AML-CR-42-Dx	blood_myeloid	ICGC_WXS_LAML_KR	FALSE	PROF						FALSE	DO51017	0	CN-AML-CR-42-Dx	FALSE		7.31403e-05	7.61878e-07	7.04942e-06	4.88507e-07	0.000498291
DO51018_CN-AML-CR-43-Dx	blood_myeloid	ICGC_WXS_LAML_KR	FALSE	PROF						FALSE	DO51018	0	CN-AML-CR-43-Dx	FALSE		5.78476e-05	6.02579e-07	6.94265e-06	3.26924e-07	0.000414901
DO51019_CN-AML-CR-44-Dx	blood_myeloid	ICGC_WXS_LAML_KR	FALSE	PROF						FALSE	DO51019	0	CN-AML-CR-44-Dx	FALSE		6.21506e-05	6.47402e-07	4.96788e-06	4.59556e-07	0.000433683
DO51020_CN-AML-CR-45-Dx	blood_myeloid	ICGC_WXS_LAML_KR	FALSE	PROF						FALSE	DO51020	0	CN-AML-CR-45-Dx	FALSE		7.29853e-05	7.60264e-07	7.28531e-06	4.76566e-07	0.000462173
DO51021_CN-AML-CR-46-Dx	blood_myeloid	ICGC_WXS_LAML_KR	FALSE	PROF						FALSE	DO51021	0	CN-AML-CR-46-Dx	FALSE		5.54328e-05	5.77425e-07	5.48345e-06	3.64119e-07	0.000368677
DO51022_CN-AML-CR-47-Dx	blood_myeloid	ICGC_WXS_LAML_KR	FALSE	PROF						FALSE	DO51022	0	CN-AML-CR-47-Dx	FALSE		6.91735e-05	7.20558e-07	4.87319e-06	5.40008e-07	0.000435892
DO51023_CN-AML-CR-48-Dx	blood_myeloid	ICGC_WXS_LAML_KR	FALSE	PROF						FALSE	DO51023	0	CN-AML-CR-48-Dx	FALSE		4.8583e-05	5.06073e-07	4.58638e-06	3.28668e-07	0.000388603
DO51024_CN-AML-CR-49-Dx	blood_myeloid	ICGC_WXS_LAML_KR	FALSE	PROF						FALSE	DO51024	0	CN-AML-CR-49-Dx	FALSE		4.7211e-05	4.91781e-07	2.21803e-06	4.16726e-07	0.000404447
DO51025_CN-AML-CR-50-Dx	blood_myeloid	ICGC_WXS_LAML_KR	FALSE	PROF						FALSE	DO51025	0	CN-AML-CR-50-Dx	FALSE		7.22177e-05	7.52267e-07	6.97039e-06	4.81914e-07	0.000412667
DO51026_CN-AML-CR-51-Dx	blood_myeloid	ICGC_WXS_LAML_KR	FALSE	PROF						FALSE	DO51026	0	CN-AML-CR-51-Dx	FALSE		6.46712e-05	6.73659e-07	7.1948e-06	3.90131e-07	0.000431257
DO51027_CN-AML-CR-52-Dx	blood_myeloid	ICGC_WXS_LAML_KR	FALSE	PROF						FALSE	DO51027	0	CN-AML-CR-52-Dx	FALSE		5.17428e-05	5.38987e-07	5.72155e-06	3.13659e-07	0.000447026
DO51028_CN-AML-CR-53-Dx	blood_myeloid	ICGC_WXS_LAML_KR	FALSE	PROF						FALSE	DO51028	0	CN-AML-CR-53-Dx	FALSE		6.88774e-05	7.17473e-07	5.7774e-06	4.97476e-07	0.000449236
DO51029_CN-AML-CR-54-Dx	blood_myeloid	ICGC_WXS_LAML_KR	FALSE	PROF						FALSE	DO51029	0	CN-AML-CR-54-Dx	FALSE		5.12899e-05	5.3427e-07	4.34495e-06	3.68588e-07	0.000396438
DO51030_CN-AML-CR-55-Dx	blood_myeloid	ICGC_WXS_LAML_KR	FALSE	PROF						FALSE	DO51030	0	CN-AML-CR-55-Dx	FALSE		6.11666e-05	6.37153e-07	5.77937e-06	4.13578e-07	0.000422949
DO51031_CN-AML-CR-56-Dx	blood_myeloid	ICGC_WXS_LAML_KR	FALSE	PROF						FALSE	DO51031	0	CN-AML-CR-56-Dx	FALSE		5.42835e-05	5.65453e-07	3.61683e-06	4.32785e-07	0.000428648
DO51032_CN-AML-CR-57-Dx	blood_myeloid	ICGC_WXS_LAML_KR	FALSE	PROF						FALSE	DO51032	0	CN-AML-CR-57-Dx	FALSE		5.7423e-05	5.98156e-07	5.72708e-06	3.75159e-07	0.00042139
DO51033_CN-AML-CR-58-Dx	blood_myeloid	ICGC_WXS_LAML_KR	FALSE	PROF						FALSE	DO51033	0	CN-AML-CR-58-Dx	FALSE		6.0589e-05	6.31136e-07	6.18344e-06	3.89731e-07	0.000453786
DO51034_CN-AML-CR-59-Dx	blood_myeloid	ICGC_WXS_LAML_KR	FALSE	PROF						FALSE	DO51034	0	CN-AML-CR-59-Dx	FALSE		6.71756e-05	6.99745e-07	5.16554e-06	5.0558e-07	0.000419353
DO51035_CN-AML-CR-60-Dx	blood_myeloid	ICGC_WXS_LAML_KR	FALSE	PROF						FALSE	DO51035	0	CN-AML-CR-60-Dx	FALSE		6.0432e-05	6.295e-07	7.00564e-06	3.52276e-07	0.000496546
DO51036_CN-AML-CR-61-Dx	blood_myeloid	ICGC_WXS_LAML_KR	FALSE	PROF						FALSE	DO51036	0	CN-AML-CR-61-Dx	FALSE		2.7682e-05	2.88354e-07	2.139e-06	2.07891e-07	0.000341276
DO51037_CN-AML-CR-62-Dx	blood_myeloid	ICGC_WXS_LAML_KR	FALSE	PROF						FALSE	DO51037	0	CN-AML-CR-62-Dx	FALSE		0.000181361	1.88917e-06	1.54526e-05	1.29946e-06	0.000632544
DO51038_CN-AML-CR-63-Dx	blood_myeloid	ICGC_WXS_LAML_KR	FALSE	PROF						FALSE	DO51038	0	CN-AML-CR-63-Dx	FALSE		7.57387e-05	7.88945e-07	7.13499e-06	5.1303e-07	0.000436349
DO51039_CN-AML-CR-64-Dx	blood_myeloid	ICGC_WXS_LAML_KR	FALSE	PROF						FALSE	DO51039	0	CN-AML-CR-64-Dx	FALSE		5.53808e-05	5.76883e-07	3.31633e-06	4.57777e-07	0.000430763
DO51040_CN-AML-CR-65-Dx	blood_myeloid	ICGC_WXS_LAML_KR	FALSE	PROF						FALSE	DO51040	0	CN-AML-CR-65-Dx	FALSE		6.0711e-05	6.32407e-07	4.96073e-06	4.44219e-07	0.000440461
DO51041_CN-AML-CR-66-Dx	blood_myeloid	ICGC_WXS_LAML_KR	FALSE	PROF						FALSE	DO51041	0	CN-AML-CR-66-Dx	FALSE		6.07406e-05	6.32714e-07	4.20488e-06	4.77403e-07	0.00042376
DO51042_CN-AML-CR-67-Dx	blood_myeloid	ICGC_WXS_LAML_KR	FALSE	PROF						FALSE	DO51042	0	CN-AML-CR-67-Dx	FALSE		5.91157e-05	6.15788e-07	6.32722e-06	3.67465e-07	0.000433093
DO51043_CN-AML-CR-68-Dx	blood_myeloid	ICGC_WXS_LAML_KR	FALSE	PROF						FALSE	DO51043	0	CN-AML-CR-68-Dx	FALSE		6.67132e-05	6.94929e-07	4.25223e-06	5.40264e-07	0.000410417
DO21023_TCGA-AB-2843-03B-01W-0728-08	blood_myeloid	ICGC_WXS_LAML_US_TCGA	FALSE						0.265324	FALSE	DO21023	0	TCGA-AB-2843	TRUE	TCGA-AB-2843-03B-01W-0728-08	2.19286e-05	2.28423e-07	2.08868e-06	1.47542e-07	2.47425e-05
DO21025_TCGA-AB-2911-03A-01W-0732-08	blood_myeloid	ICGC_WXS_LAML_US_TCGA	FALSE						0.312599	FALSE	DO21025	0	TCGA-AB-2911	TRUE	TCGA-AB-2911-03A-01W-0732-08	1.04221e-05	1.08564e-07	4.88048e-07	9.20646e-08	1.46259e-05
DO21031_TCGA-AB-2916-03A-01W-0732-08	blood_myeloid	ICGC_WXS_LAML_US_TCGA	FALSE						0.299694	FALSE	DO21031	0	TCGA-AB-2916	TRUE	TCGA-AB-2916-03A-01W-0732-08	1.20723e-05	1.25754e-07	1.26291e-06	7.63121e-08	1.46923e-05
DO21037_TCGA-AB-2877-03A-01W-0732-08	blood_myeloid	ICGC_WXS_LAML_US_TCGA	FALSE						0.339172	FALSE	DO21037	0	TCGA-AB-2877	TRUE	TCGA-AB-2877-03A-01W-0732-08	1.59737e-05	1.66393e-07	2.32458e-06	7.25588e-08	1.59357e-05
DO21041_TCGA-AB-2893-03A-01W-0733-08	blood_myeloid	ICGC_WXS_LAML_US_TCGA	FALSE						0.332132	FALSE	DO21041	0	TCGA-AB-2893	TRUE	TCGA-AB-2893-03A-01W-0733-08	5.30651e-07	5.52762e-09	0	5.76795e-09	2.75683e-06
DO21043_TCGA-AB-2861-03B-01W-0728-08	blood_myeloid	ICGC_WXS_LAML_US_TCGA	FALSE	PROF					0.0709551	FALSE	DO21043	0	TCGA-AB-2861	TRUE	TCGA-AB-2861-03B-01W-0728-08	2.95743e-05	3.08066e-07	3.39893e-06	1.7368e-07	2.62042e-05
DO21045_TCGA-AB-2903-03A-01W-0761-09	blood_myeloid	ICGC_WXS_LAML_US_TCGA	FALSE	PROF					0.125461	FALSE	DO21045	0	TCGA-AB-2903	TRUE	TCGA-AB-2903-03A-01W-0761-09	1.32233e-06	1.37743e-08	3.30583e-07	0	1.04747e-06
DO21047_TCGA-AB-2917-03A-01W-0732-08	blood_myeloid	ICGC_WXS_LAML_US_TCGA	FALSE	PROF					0.170708	FALSE	DO21047	0	TCGA-AB-2917	TRUE	TCGA-AB-2917-03A-01W-0732-08	1.51581e-05	1.57897e-07	3.10498e-06	2.97634e-08	1.51416e-05
DO21053_TCGA-AB-2803-03B-01W-0728-08	blood_myeloid	ICGC_WXS_LAML_US_TCGA	FALSE						0.330706	FALSE	DO21053	0	TCGA-AB-2803	TRUE	TCGA-AB-2803-03B-01W-0728-08	1.13055e-05	1.17766e-07	1.75453e-06	4.66026e-08	1.28419e-05
DO21055_TCGA-AB-2921-03A-01W-0755-09	blood_myeloid	ICGC_WXS_LAML_US_TCGA	FALSE						0.334086	FALSE	DO21055	0	TCGA-AB-2921	TRUE	TCGA-AB-2921-03A-01W-0755-09	3.67258e-06	3.8256e-08	6.61167e-07	1.11729e-08	3.40697e-06
DO21057_TCGA-AB-2860-03B-01W-0728-08	blood_myeloid	ICGC_WXS_LAML_US_TCGA	FALSE						0.301248	FALSE	DO21057	0	TCGA-AB-2860	TRUE	TCGA-AB-2860-03B-01W-0728-08	2.49315e-05	2.59703e-07	9.83238e-07	2.28245e-07	2.65642e-05
DO21069_TCGA-AB-2804-03B-01W-0728-08	blood_myeloid	ICGC_WXS_LAML_US_TCGA	FALSE	PROF					0.245496	FALSE	DO21069	0	TCGA-AB-2804	TRUE	TCGA-AB-2804-03B-01W-0728-08	5.37682e-05	5.60086e-07	2.08154e-06	4.93936e-07	4.93792e-05
DO21073_TCGA-AB-2824-03B-01W-0728-08	blood_myeloid	ICGC_WXS_LAML_US_TCGA	FALSE						0.309205	FALSE	DO21073	0	TCGA-AB-2824	TRUE	TCGA-AB-2824-03B-01W-0728-08	5.51396e-05	5.74371e-07	3.30583e-07	5.8497e-07	5.52286e-05
DO21081_TCGA-AB-2866-03B-01W-0728-08	blood_myeloid	ICGC_WXS_LAML_US_TCGA	FALSE						0.336413	FALSE	DO21081	0	TCGA-AB-2866	TRUE	TCGA-AB-2866-03B-01W-0728-08	2.19508e-05	2.28654e-07	3.30583e-07	2.24222e-07	2.0012e-05
DO21085_TCGA-AB-2938-03A-01W-0732-08	blood_myeloid	ICGC_WXS_LAML_US_TCGA	FALSE	PROF					0.165096	FALSE	DO21085	0	TCGA-AB-2938	TRUE	TCGA-AB-2938-03A-01W-0732-08	3.19401e-05	3.3271e-07	1.85219e-06	2.66645e-07	3.51513e-05
DO21107_TCGA-AB-2959-03A-01W-0733-08	blood_myeloid	ICGC_WXS_LAML_US_TCGA	FALSE						0.372338	FALSE	DO21107	0	TCGA-AB-2959	TRUE	TCGA-AB-2959-03A-01W-0733-08	2.52674e-05	2.63202e-07	3.72951e-06	1.12493e-07	2.29203e-05
DO21131_TCGA-AB-2830-03B-01W-0728-08	blood_myeloid	ICGC_WXS_LAML_US_TCGA	FALSE	PROF					0.215061	FALSE	DO21131	0	TCGA-AB-2830	TRUE	TCGA-AB-2830-03B-01W-0728-08	2.75199e-05	2.86665e-07	2.36835e-06	1.96157e-07	2.74634e-05
DO21137_TCGA-AB-2909-03A-01W-0745-08	blood_myeloid	ICGC_WXS_LAML_US_TCGA	FALSE						0.279267	FALSE	DO21137	0	TCGA-AB-2909	TRUE	TCGA-AB-2909-03A-01W-0745-08	3.82231e-06	3.98157e-08	3.30583e-07	2.71737e-08	3.96169e-06
DO21143_TCGA-AB-2898-03A-01W-0733-08	blood_myeloid	ICGC_WXS_LAML_US_TCGA	FALSE						0.335322	FALSE	DO21143	0	TCGA-AB-2898	TRUE	TCGA-AB-2898-03A-01W-0733-08	4.09479e-05	4.2654e-07	3.40387e-06	2.97091e-07	4.64677e-05
DO21161_TCGA-AB-2928-03A-01W-0745-08	blood_myeloid	ICGC_WXS_LAML_US_TCGA	FALSE						0.259442	FALSE	DO21161	0	TCGA-AB-2928	TRUE	TCGA-AB-2928-03A-01W-0745-08	1.32233e-06	1.37743e-08	3.30583e-07	0	1.04747e-06
DO21164_TCGA-AB-2846-03B-01W-0728-08	blood_myeloid	ICGC_WXS_LAML_US_TCGA	FALSE						0.310804	FALSE	DO21164	0	TCGA-AB-2846	TRUE	TCGA-AB-2846-03B-01W-0728-08	3.84523e-05	4.00545e-07	7.78431e-07	3.84115e-07	3.78305e-05
DO21176_TCGA-AB-2935-03A-01W-0745-08	blood_myeloid	ICGC_WXS_LAML_US_TCGA	FALSE						0.315461	FALSE	DO21176	0	TCGA-AB-2935	TRUE	TCGA-AB-2935-03A-01W-0745-08	1.91851e-05	1.99845e-07	3.35159e-06	6.28129e-08	1.89641e-05
DO21181_TCGA-AB-2845-03D-01W-0755-09	blood_myeloid	ICGC_WXS_LAML_US_TCGA	FALSE						0.324682	FALSE	DO21181	0	TCGA-AB-2845	TRUE	TCGA-AB-2845-03D-01W-0755-09	1.1273e-06	1.17427e-08	0	1.22532e-08	2.51017e-06
DO21193_TCGA-AB-2908-03A-01W-0745-08	blood_myeloid	ICGC_WXS_LAML_US_TCGA	FALSE						0.315619	FALSE	DO21193	0	TCGA-AB-2908	TRUE	TCGA-AB-2908-03A-01W-0745-08	7.83221e-06	8.15855e-08	4.91619e-07	6.3758e-08	7.39149e-06
DO21211_TCGA-AB-2880-03A-01W-0732-08	blood_myeloid	ICGC_WXS_LAML_US_TCGA	FALSE						0.332814	FALSE	DO21211	0	TCGA-AB-2880	TRUE	TCGA-AB-2880-03A-01W-0732-08	3.05384e-06	3.18108e-08	2.86812e-07	2.07238e-08	3.37147e-06
DO21235_TCGA-AB-2864-03B-01W-0728-08	blood_myeloid	ICGC_WXS_LAML_US_TCGA	FALSE	PROF						FALSE	DO21235	0	TCGA-AB-2864	TRUE	TCGA-AB-2864-03B-01W-0728-08	3.03511e-05	3.16158e-07	6.17396e-07	3.0306e-07	3.12084e-05
DO21241_TCGA-AB-2862-03B-01W-0728-08	blood_myeloid	ICGC_WXS_LAML_US_TCGA	FALSE						0.322034	FALSE	DO21241	0	TCGA-AB-2862	TRUE	TCGA-AB-2862-03B-01W-0728-08	2.38312e-05	2.48242e-07	1.59349e-06	1.89753e-07	2.55038e-05
DO21253_TCGA-AB-2957-03A-01W-0733-08	blood_myeloid	ICGC_WXS_LAML_US_TCGA	FALSE	PROF					0.179117	FALSE	DO21253	0	TCGA-AB-2957	TRUE	TCGA-AB-2957-03A-01W-0733-08	9.28977e-06	9.67684e-08	8.22202e-07	6.52278e-08	9.32193e-06
DO21259_TCGA-AB-2819-03B-01W-0728-08	blood_myeloid	ICGC_WXS_LAML_US_TCGA	FALSE						0.321283	FALSE	DO21259	0	TCGA-AB-2819	TRUE	TCGA-AB-2819-03B-01W-0728-08	1.65065e-05	1.71943e-07	2.74985e-06	5.98599e-08	1.49875e-05
DO21265_TCGA-AB-2901-03A-01W-0733-08	blood_myeloid	ICGC_WXS_LAML_US_TCGA	FALSE						0.326056	FALSE	DO21265	0	TCGA-AB-2901	TRUE	TCGA-AB-2901-03A-01W-0733-08	9.61269e-06	1.00132e-07	5.73625e-07	7.95456e-08	1.04099e-05
DO21271_TCGA-AB-2813-03B-01W-0728-08	blood_myeloid	ICGC_WXS_LAML_US_TCGA	FALSE						0.256758	FALSE	DO21271	0	TCGA-AB-2813	TRUE	TCGA-AB-2813-03B-01W-0728-08	1.40316e-05	1.46162e-07	1.59349e-06	8.32348e-08	1.26126e-05
DO21283_TCGA-AB-2806-03B-01W-0728-08	blood_myeloid	ICGC_WXS_LAML_US_TCGA	FALSE	PROF					0.206641	FALSE	DO21283	0	TCGA-AB-2806	TRUE	TCGA-AB-2806-03B-01W-0728-08	0.000394046	4.10465e-06	2.47567e-05	3.20673e-06	0.000384138
DO21301_TCGA-AB-2888-03A-01W-0732-08	blood_myeloid	ICGC_WXS_LAML_US_TCGA	FALSE						0.320598	FALSE	DO21301	0	TCGA-AB-2888	TRUE	TCGA-AB-2888-03A-01W-0732-08	1.64246e-05	1.7109e-07	2.87068e-06	5.37159e-08	1.40538e-05
DO21313_TCGA-AB-2945-03A-01W-0733-08	blood_myeloid	ICGC_WXS_LAML_US_TCGA	FALSE						0.261827	FALSE	DO21313	0	TCGA-AB-2945	TRUE	TCGA-AB-2945-03A-01W-0733-08	6.918e-06	7.20625e-08	1.46414e-06	1.15373e-08	5.67802e-06
DO21319_TCGA-AB-2838-03A-01W-0726-08	blood_myeloid	ICGC_WXS_LAML_US_TCGA	FALSE						0.421759	FALSE	DO21319	0	TCGA-AB-2838	TRUE	TCGA-AB-2838-03A-01W-0726-08	2.32692e-05	2.42387e-07	3.06478e-06	1.19675e-07	2.08747e-05
DO21331_TCGA-AB-2889-03A-01W-0732-08	blood_myeloid	ICGC_WXS_LAML_US_TCGA	FALSE						0.315599	FALSE	DO21331	0	TCGA-AB-2889	TRUE	TCGA-AB-2889-03A-01W-0732-08	1.87012e-06	1.94804e-08	3.30583e-07	5.95421e-09	2.06061e-06
DO21343_TCGA-AB-2865-03B-01W-0728-08	blood_myeloid	ICGC_WXS_LAML_US_TCGA	FALSE	PROF						FALSE	DO21343	0	TCGA-AB-2865	TRUE	TCGA-AB-2865-03B-01W-0728-08	7.96082e-06	8.29252e-08	1.75453e-06	1.02468e-08	8.0886e-06
DO21349_TCGA-AB-2936-03A-01W-0745-08	blood_myeloid	ICGC_WXS_LAML_US_TCGA	FALSE						0.326392	FALSE	DO21349	0	TCGA-AB-2936	TRUE	TCGA-AB-2936-03A-01W-0745-08	1.53866e-05	1.60277e-07	1.60063e-06	9.76525e-08	2.11809e-05
DO21355_TCGA-AB-2820-03B-01W-0728-08	blood_myeloid	ICGC_WXS_LAML_US_TCGA	FALSE						0.273252	FALSE	DO21355	0	TCGA-AB-2820	TRUE	TCGA-AB-2820-03B-01W-0728-08	6.59052e-06	6.86513e-08	1.10544e-06	2.35734e-08	5.77699e-06
DO21361_TCGA-AB-2875-03A-01W-0732-08	blood_myeloid	ICGC_WXS_LAML_US_TCGA	FALSE						0.261961	FALSE	DO21361	0	TCGA-AB-2875	TRUE	TCGA-AB-2875-03A-01W-0732-08	2.01003e-05	2.09379e-07	1.10901e-06	1.70264e-07	2.17686e-05
DO21379_TCGA-AB-2912-03A-01W-0732-08	blood_myeloid	ICGC_WXS_LAML_US_TCGA	FALSE	PROF					0.157601	FALSE	DO21379	0	TCGA-AB-2912	TRUE	TCGA-AB-2912-03A-01W-0732-08	4.06021e-05	4.22938e-07	1.59706e-06	3.71889e-07	4.39167e-05
DO21397_TCGA-AB-2885-03A-01W-0732-08	blood_myeloid	ICGC_WXS_LAML_US_TCGA	FALSE	PROF					0.198322	FALSE	DO21397	0	TCGA-AB-2885	TRUE	TCGA-AB-2885-03A-01W-0732-08	3.27349e-05	3.40989e-07	3.3199e-06	2.11471e-07	3.06516e-05
DO21403_TCGA-AB-2849-03B-01W-0728-08	blood_myeloid	ICGC_WXS_LAML_US_TCGA	FALSE	PROF					0.215733	FALSE	DO21403	0	TCGA-AB-2849	TRUE	TCGA-AB-2849-03B-01W-0728-08	2.71919e-05	2.83248e-07	3.10498e-06	1.60565e-07	3.00321e-05
DO21421_TCGA-AB-2844-03B-01W-0728-08	blood_myeloid	ICGC_WXS_LAML_US_TCGA	FALSE						0.329719	FALSE	DO21421	0	TCGA-AB-2844	TRUE	TCGA-AB-2844-03B-01W-0728-08	1.11078e-05	1.15707e-07	5.73625e-07	9.57971e-08	1.17893e-05
DO21433_TCGA-AB-2942-03A-01W-0733-08	blood_myeloid	ICGC_WXS_LAML_US_TCGA	FALSE						0.31545	FALSE	DO21433	0	TCGA-AB-2942	TRUE	TCGA-AB-2942-03A-01W-0733-08	7.48707e-06	7.79903e-08	4.91619e-07	6.00065e-08	8.7971e-06
DO21445_TCGA-AB-2883-03A-01W-0732-08	blood_myeloid	ICGC_WXS_LAML_US_TCGA	FALSE						0.267008	FALSE	DO21445	0	TCGA-AB-2883	TRUE	TCGA-AB-2883-03A-01W-0732-08	1.33769e-05	1.39343e-07	8.18631e-07	1.09808e-07	1.59873e-05
DO21451_TCGA-AB-2859-03B-01W-0728-08	blood_myeloid	ICGC_WXS_LAML_US_TCGA	FALSE	PROF						FALSE	DO21451	0	TCGA-AB-2859	TRUE	TCGA-AB-2859-03B-01W-0728-08	2.69636e-05	2.80871e-07	1.46414e-06	2.29424e-07	2.6681e-05
DO21457_TCGA-AB-2950-03A-01W-0733-08	blood_myeloid	ICGC_WXS_LAML_US_TCGA	FALSE						0.25649	FALSE	DO21457	0	TCGA-AB-2950	TRUE	TCGA-AB-2950-03A-01W-0733-08	3.64012e-05	3.79179e-07	3.32704e-06	2.51011e-07	3.26617e-05
DO21475_TCGA-AB-2841-03B-01W-0728-08	blood_myeloid	ICGC_WXS_LAML_US_TCGA	FALSE						0.335001	FALSE	DO21475	0	TCGA-AB-2841	TRUE	TCGA-AB-2841-03B-01W-0728-08	1.19577e-05	1.2456e-07	3.30583e-07	1.15602e-07	1.06376e-05
DO21481_TCGA-AB-2881-03A-01W-0732-08	blood_myeloid	ICGC_WXS_LAML_US_TCGA	FALSE						0.306366	FALSE	DO21481	0	TCGA-AB-2881	TRUE	TCGA-AB-2881-03A-01W-0732-08	7.39949e-06	7.7078e-08	1.31025e-06	2.34619e-08	8.26593e-06
DO21487_TCGA-AB-2808-03B-01W-0728-08	blood_myeloid	ICGC_WXS_LAML_US_TCGA	FALSE						0.331096	FALSE	DO21487	0	TCGA-AB-2808	TRUE	TCGA-AB-2808-03B-01W-0728-08	0.000541373	5.6393e-06	2.62158e-05	4.74468e-06	0.000527448
DO21493_TCGA-AB-2913-03A-01W-0732-08	blood_myeloid	ICGC_WXS_LAML_US_TCGA	FALSE						0.313629	FALSE	DO21493	0	TCGA-AB-2913	TRUE	TCGA-AB-2913-03A-01W-0732-08	1.22373e-05	1.27472e-07	1.31025e-06	7.60472e-08	1.69552e-05
DO21505_TCGA-AB-2863-03D-01W-0755-09	blood_myeloid	ICGC_WXS_LAML_US_TCGA	FALSE						0.342476	FALSE	DO21505	0	TCGA-AB-2863	TRUE	TCGA-AB-2863-03D-01W-0755-09	3.03537e-06	3.16184e-08	3.30583e-07	1.862e-08	2.9101e-06
DO21517_TCGA-AB-2890-03A-01W-0732-08	blood_myeloid	ICGC_WXS_LAML_US_TCGA	FALSE	PROF					0.223057	FALSE	DO21517	0	TCGA-AB-2890	TRUE	TCGA-AB-2890-03A-01W-0732-08	6.24768e-06	6.508e-08	1.26291e-06	1.30006e-08	6.41312e-06
DO21523_TCGA-AB-2836-03B-01W-0728-08	blood_myeloid	ICGC_WXS_LAML_US_TCGA	FALSE						0.306699	FALSE	DO21523	0	TCGA-AB-2836	TRUE	TCGA-AB-2836-03B-01W-0728-08	5.21921e-06	5.43668e-08	4.88048e-07	3.55111e-08	5.58525e-06
DO21529_TCGA-AB-2899-03A-01W-0733-08	blood_myeloid	ICGC_WXS_LAML_US_TCGA	FALSE						0.340731	FALSE	DO21529	0	TCGA-AB-2899	TRUE	TCGA-AB-2899-03A-01W-0733-08	1.01584e-05	1.05817e-07	1.06524e-06	6.41025e-08	1.30512e-05
DO21535_TCGA-AB-2894-03A-01W-0733-08	blood_myeloid	ICGC_WXS_LAML_US_TCGA	FALSE	PROF					0.0905223	FALSE	DO21535	0	TCGA-AB-2894	TRUE	TCGA-AB-2894-03A-01W-0733-08	1.87853e-06	1.9568e-08	3.30583e-07	6.04556e-09	3.04537e-06
DO21547_TCGA-AB-2939-03A-01W-0745-08	blood_myeloid	ICGC_WXS_LAML_US_TCGA	FALSE	PROF					0.202339	FALSE	DO21547	0	TCGA-AB-2939	TRUE	TCGA-AB-2939-03A-01W-0745-08	1.24607e-05	1.29799e-07	3.30583e-07	1.21069e-07	1.55899e-05
DO21559_TCGA-AB-2818-03B-01W-0728-08	blood_myeloid	ICGC_WXS_LAML_US_TCGA	FALSE						0.27592	FALSE	DO21559	0	TCGA-AB-2818	TRUE	TCGA-AB-2818-03B-01W-0728-08	5.49646e-06	5.72548e-08	0	5.97441e-08	7.70895e-06
DO21571_TCGA-AB-2828-03B-01W-0728-08	blood_myeloid	ICGC_WXS_LAML_US_TCGA	FALSE						0.273523	FALSE	DO21571	0	TCGA-AB-2828	TRUE	TCGA-AB-2828-03B-01W-0728-08	0.000518101	5.39688e-06	2.55687e-05	4.51985e-06	0.000515546
DO21589_TCGA-AB-2807-03B-01W-0728-08	blood_myeloid	ICGC_WXS_LAML_US_TCGA	FALSE						0.368007	FALSE	DO21589	0	TCGA-AB-2807	TRUE	TCGA-AB-2807-03B-01W-0728-08	0.000198703	2.06982e-06	1.42979e-05	1.53816e-06	0.000198278
DO21595_TCGA-AB-2868-03B-01W-0728-08	blood_myeloid	ICGC_WXS_LAML_US_TCGA	FALSE						0.317888	FALSE	DO21595	0	TCGA-AB-2868	TRUE	TCGA-AB-2868-03B-01W-0728-08	0.000169597	1.76664e-06	1.26648e-06	1.78839e-06	0.000169112
DO21601_TCGA-AB-2932-03A-01W-0745-08	blood_myeloid	ICGC_WXS_LAML_US_TCGA	FALSE						0.310616	FALSE	DO21601	0	TCGA-AB-2932	TRUE	TCGA-AB-2932-03A-01W-0745-08	3.20732e-06	3.34095e-08	4.88048e-07	1.36427e-08	4.14675e-06
DO21613_TCGA-AB-2920-03A-01W-0732-08	blood_myeloid	ICGC_WXS_LAML_US_TCGA	FALSE						0.407075	FALSE	DO21613	0	TCGA-AB-2920	TRUE	TCGA-AB-2920-03A-01W-0732-08	1.04189e-05	1.0853e-07	3.30583e-07	9.88758e-08	9.53794e-06
DO21619_TCGA-AB-2816-03B-01W-0728-08	blood_myeloid	ICGC_WXS_LAML_US_TCGA	FALSE						0.345232	FALSE	DO21619	0	TCGA-AB-2816	TRUE	TCGA-AB-2816-03B-01W-0728-08	2.93177e-06	3.05392e-08	4.88048e-07	1.06476e-08	3.44148e-06
DO21625_TCGA-AB-2854-03B-01W-0728-08	blood_myeloid	ICGC_WXS_LAML_US_TCGA	FALSE						0.284607	FALSE	DO21625	0	TCGA-AB-2854	TRUE	TCGA-AB-2854-03B-01W-0728-08	0.000253191	2.63741e-06	1.71068e-05	2.0083e-06	0.000242378
DO21637_TCGA-AB-2822-03D-01W-0755-09	blood_myeloid	ICGC_WXS_LAML_US_TCGA	FALSE						0.342054	FALSE	DO21637	0	TCGA-AB-2822	TRUE	TCGA-AB-2822-03D-01W-0755-09	2.18728e-05	2.27842e-07	3.25887e-06	9.60578e-08	2.24212e-05
DO21643_TCGA-AB-2855-03B-01W-0728-08	blood_myeloid	ICGC_WXS_LAML_US_TCGA	FALSE						0.337387	FALSE	DO21643	0	TCGA-AB-2855	TRUE	TCGA-AB-2855-03B-01W-0728-08	3.12637e-05	3.25664e-07	6.61167e-07	3.11077e-07	2.70777e-05
DO21649_TCGA-AB-2904-03A-01W-0732-08	blood_myeloid	ICGC_WXS_LAML_US_TCGA	FALSE						0.340277	FALSE	DO21649	0	TCGA-AB-2904	TRUE	TCGA-AB-2904-03A-01W-0732-08	4.97397e-05	5.18122e-07	3.06121e-06	4.07553e-07	4.86483e-05
DO21655_TCGA-AB-2821-03B-01W-0728-08	blood_myeloid	ICGC_WXS_LAML_US_TCGA	FALSE						0.31106	FALSE	DO21655	0	TCGA-AB-2821	TRUE	TCGA-AB-2821-03B-01W-0728-08	1.00682e-05	1.04877e-07	4.88048e-07	8.82177e-08	1.25435e-05
DO21661_TCGA-AB-2872-03A-01W-0732-08	blood_myeloid	ICGC_WXS_LAML_US_TCGA	FALSE						0.298074	FALSE	DO21661	0	TCGA-AB-2872	TRUE	TCGA-AB-2872-03A-01W-0732-08	3.01369e-05	3.13926e-07	2.36835e-06	2.24603e-07	2.92175e-05
DO21673_TCGA-AB-2910-03A-01W-0745-08	blood_myeloid	ICGC_WXS_LAML_US_TCGA	FALSE	PROF					0.0914041	FALSE	DO21673	0	TCGA-AB-2910	TRUE	TCGA-AB-2910-03A-01W-0745-08	9.67656e-06	1.00798e-07	1.26648e-06	5.01157e-08	8.38247e-06
DO21679_TCGA-AB-2833-03B-01W-0728-08	blood_myeloid	ICGC_WXS_LAML_US_TCGA	FALSE						0.380094	FALSE	DO21679	0	TCGA-AB-2833	TRUE	TCGA-AB-2833-03B-01W-0728-08	0.000353606	3.68339e-06	1.83582e-05	3.04536e-06	0.000337341
DO21685_TCGA-AB-2923-03A-01W-0745-08	blood_myeloid	ICGC_WXS_LAML_US_TCGA	FALSE						0.257934	FALSE	DO21685	0	TCGA-AB-2923	TRUE	TCGA-AB-2923-03A-01W-0745-08	1.03263e-05	1.07566e-07	1.4396e-06	4.96513e-08	1.03007e-05
DO21703_TCGA-AB-2949-03A-01W-0733-08	blood_myeloid	ICGC_WXS_LAML_US_TCGA	FALSE						0.344298	FALSE	DO21703	0	TCGA-AB-2949	TRUE	TCGA-AB-2949-03A-01W-0733-08	1.36398e-05	1.42081e-07	1.26291e-06	9.33491e-08	1.49184e-05
DO21715_TCGA-AB-2811-03B-01W-0728-08	blood_myeloid	ICGC_WXS_LAML_US_TCGA	FALSE	PROF					0.24363	FALSE	DO21715	0	TCGA-AB-2811	TRUE	TCGA-AB-2811-03B-01W-0728-08	4.69117e-06	4.88664e-08	7.7486e-07	1.73015e-08	4.6786e-06
DO21721_TCGA-AB-2857-03B-01W-0728-08	blood_myeloid	ICGC_WXS_LAML_US_TCGA	FALSE	PROF					0.121998	FALSE	DO21721	0	TCGA-AB-2857	TRUE	TCGA-AB-2857-03B-01W-0728-08	3.4207e-05	3.56323e-07	1.23479e-06	3.18129e-07	3.86636e-05
DO21733_TCGA-AB-2915-03A-01W-0745-08	blood_myeloid	ICGC_WXS_LAML_US_TCGA	FALSE						0.285249	FALSE	DO21733	0	TCGA-AB-2915	TRUE	TCGA-AB-2915-03A-01W-0745-08	2.16829e-05	2.25863e-07	2.04491e-06	1.46774e-07	1.93931e-05
DO21737_TCGA-AB-2886-03A-01W-0732-08	blood_myeloid	ICGC_WXS_LAML_US_TCGA	FALSE						0.336598	FALSE	DO21737	0	TCGA-AB-2886	TRUE	TCGA-AB-2886-03A-01W-0732-08	2.6746e-05	2.78604e-07	1.92407e-06	2.07062e-07	2.60414e-05
DO21749_TCGA-AB-2834-03B-01W-0728-08	blood_myeloid	ICGC_WXS_LAML_US_TCGA	FALSE						0.336839	FALSE	DO21749	0	TCGA-AB-2834	TRUE	TCGA-AB-2834-03B-01W-0728-08	3.09015e-05	3.21891e-07	3.30583e-07	3.21513e-07	3.28125e-05
DO21755_TCGA-AB-2874-03A-01W-0732-08	blood_myeloid	ICGC_WXS_LAML_US_TCGA	FALSE						0.34398	FALSE	DO21755	0	TCGA-AB-2874	TRUE	TCGA-AB-2874-03A-01W-0732-08	1.74406e-05	1.81673e-07	7.78431e-07	1.55727e-07	1.76565e-05
DO21761_TCGA-AB-2924-03A-01W-0745-08	blood_myeloid	ICGC_WXS_LAML_US_TCGA	FALSE						0.276424	FALSE	DO21761	0	TCGA-AB-2924	TRUE	TCGA-AB-2924-03A-01W-0745-08	2.77373e-06	2.8893e-08	2.86812e-07	1.76791e-08	5.10945e-06
DO21773_TCGA-AB-2940-03A-01W-0733-08	blood_myeloid	ICGC_WXS_LAML_US_TCGA	FALSE						0.32767	FALSE	DO21773	0	TCGA-AB-2940	TRUE	TCGA-AB-2940-03A-01W-0733-08	1.09171e-05	1.13719e-07	1.31025e-06	6.16964e-08	1.2949e-05
DO21791_TCGA-AB-2925-03A-01W-0732-08	blood_myeloid	ICGC_WXS_LAML_US_TCGA	FALSE						0.31395	FALSE	DO21791	0	TCGA-AB-2925	TRUE	TCGA-AB-2925-03A-01W-0732-08	1.58346e-05	1.64944e-07	2.13245e-06	7.94e-08	1.6253e-05
DO21809_TCGA-AB-2829-03B-01W-0728-08	blood_myeloid	ICGC_WXS_LAML_US_TCGA	FALSE						0.267264	FALSE	DO21809	0	TCGA-AB-2829	TRUE	TCGA-AB-2829-03B-01W-0728-08	2.1441e-05	2.23344e-07	1.63726e-06	1.6187e-07	2.01919e-05
DO21821_TCGA-AB-2805-03B-01W-0728-08	blood_myeloid	ICGC_WXS_LAML_US_TCGA	FALSE	PROF					0.233678	FALSE	DO21821	0	TCGA-AB-2805	TRUE	TCGA-AB-2805-03B-01W-0728-08	5.1729e-05	5.38844e-07	4.0193e-06	3.87519e-07	5.18457e-05
DO21827_TCGA-AB-2839-03B-01W-0728-08	blood_myeloid	ICGC_WXS_LAML_US_TCGA	FALSE						0.326798	FALSE	DO21827	0	TCGA-AB-2839	TRUE	TCGA-AB-2839-03B-01W-0728-08	1.01493e-05	1.05722e-07	1.75453e-06	3.40349e-08	8.77781e-06
DO21833_TCGA-AB-2826-03B-01W-0728-08	blood_myeloid	ICGC_WXS_LAML_US_TCGA	FALSE						0.344803	FALSE	DO21833	0	TCGA-AB-2826	TRUE	TCGA-AB-2826-03B-01W-0728-08	0.000477367	4.97257e-06	3.25713e-05	3.77262e-06	0.000451119
DO21839_TCGA-AB-2891-03A-01W-0733-08	blood_myeloid	ICGC_WXS_LAML_US_TCGA	FALSE						0.323035	FALSE	DO21839	0	TCGA-AB-2891	TRUE	TCGA-AB-2891-03A-01W-0733-08	1.00929e-05	1.05135e-07	3.30583e-07	9.53325e-08	9.1532e-06
DO21845_TCGA-AB-2802-03B-01W-0728-08	blood_myeloid	ICGC_WXS_LAML_US_TCGA	FALSE						0.278457	FALSE	DO21845	0	TCGA-AB-2802	TRUE	TCGA-AB-2802-03B-01W-0728-08	5.44607e-06	5.67298e-08	2.86812e-07	4.67263e-08	8.951e-06
DO21863_TCGA-AB-2937-03A-01W-0732-08	blood_myeloid	ICGC_WXS_LAML_US_TCGA	FALSE	PROF					0.190262	FALSE	DO21863	0	TCGA-AB-2937	TRUE	TCGA-AB-2937-03A-01W-0732-08	3.80693e-06	3.96555e-08	5.73625e-07	1.64394e-08	5.09853e-06
DO21869_TCGA-AB-2814-03D-01W-0755-09	blood_myeloid	ICGC_WXS_LAML_US_TCGA	FALSE						0.266728	FALSE	DO21869	0	TCGA-AB-2814	TRUE	TCGA-AB-2814-03D-01W-0755-09	1.29099e-05	1.34478e-07	2.08868e-06	4.95131e-08	1.08671e-05
DO21893_TCGA-AB-2927-03A-01W-0755-09	blood_myeloid	ICGC_WXS_LAML_US_TCGA	FALSE						0.325927	FALSE	DO21893	0	TCGA-AB-2927	TRUE	TCGA-AB-2927-03A-01W-0755-09	2.08631e-05	2.17324e-07	2.8162e-06	1.04329e-07	1.90088e-05
DO21899_TCGA-AB-2887-03A-01W-0732-08	blood_myeloid	ICGC_WXS_LAML_US_TCGA	FALSE						0.339543	FALSE	DO21899	0	TCGA-AB-2887	TRUE	TCGA-AB-2887-03A-01W-0732-08	5.31948e-07	5.54112e-09	0	5.78204e-09	1.91768e-06
DO21905_TCGA-AB-2952-03A-01W-0733-08	blood_myeloid	ICGC_WXS_LAML_US_TCGA	FALSE	PROF					0.216863	FALSE	DO21905	0	TCGA-AB-2952	TRUE	TCGA-AB-2952-03A-01W-0733-08	1.17529e-05	1.22426e-07	2.86812e-07	1.15279e-07	1.02158e-05
DO21906_TCGA-AB-2817-03B-01W-0728-08	blood_myeloid	ICGC_WXS_LAML_US_TCGA	FALSE						0.339123	FALSE	DO21906	0	TCGA-AB-2817	TRUE	TCGA-AB-2817-03B-01W-0728-08	1.10407e-05	1.15007e-07	1.30668e-06	6.31953e-08	9.86286e-06
DO21912_TCGA-AB-2897-03A-01W-0733-08	blood_myeloid	ICGC_WXS_LAML_US_TCGA	FALSE						0.328311	FALSE	DO21912	0	TCGA-AB-2897	TRUE	TCGA-AB-2897-03A-01W-0733-08	1.23106e-05	1.28236e-07	1.43603e-06	7.13751e-08	1.23113e-05
DO21918_TCGA-AB-2900-03A-01W-0733-08	blood_myeloid	ICGC_WXS_LAML_US_TCGA	FALSE	PROF					0.180564	FALSE	DO21918	0	TCGA-AB-2900	TRUE	TCGA-AB-2900-03A-01W-0733-08	1.5666e-05	1.63187e-07	6.61167e-07	1.41536e-07	1.49763e-05
DO21936_TCGA-AB-2871-03A-01W-0732-08	blood_myeloid	ICGC_WXS_LAML_US_TCGA	FALSE	PROF					0.229151	FALSE	DO21936	0	TCGA-AB-2871	TRUE	TCGA-AB-2871-03A-01W-0732-08	2.1328e-05	2.22167e-07	2.04134e-06	1.43072e-07	2.19808e-05
DO21942_TCGA-AB-2810-03B-01W-0728-08	blood_myeloid	ICGC_WXS_LAML_US_TCGA	FALSE						0.289515	FALSE	DO21942	0	TCGA-AB-2810	TRUE	TCGA-AB-2810-03B-01W-0728-08	6.27867e-06	6.54028e-08	8.18631e-07	3.26537e-08	5.95699e-06
DO21960_TCGA-AB-2873-03A-01W-0732-08	blood_myeloid	ICGC_WXS_LAML_US_TCGA	FALSE	PROF					0.17711	FALSE	DO21960	0	TCGA-AB-2873	TRUE	TCGA-AB-2873-03A-01W-0732-08	6.66747e-06	6.94528e-08	3.30583e-07	5.80993e-08	7.33804e-06
DO21966_TCGA-AB-2943-03A-01W-0745-08	blood_myeloid	ICGC_WXS_LAML_US_TCGA	FALSE						0.323026	FALSE	DO21966	0	TCGA-AB-2943	TRUE	TCGA-AB-2943-03A-01W-0745-08	1.80795e-05	1.88328e-07	2.08511e-06	1.05859e-07	2.54167e-05
DO21972_TCGA-AB-2929-03A-01W-0732-08	blood_myeloid	ICGC_WXS_LAML_US_TCGA	FALSE						0.299524	FALSE	DO21972	0	TCGA-AB-2929	TRUE	TCGA-AB-2929-03A-01W-0732-08	2.82793e-05	2.94576e-07	4.88048e-07	2.86164e-07	2.90167e-05
DO21978_TCGA-AB-2918-03A-01W-0745-08	blood_myeloid	ICGC_WXS_LAML_US_TCGA	FALSE						0.366596	FALSE	DO21978	0	TCGA-AB-2918	TRUE	TCGA-AB-2918-03A-01W-0745-08	1.85017e-05	1.92726e-07	1.10544e-06	1.53043e-07	1.91245e-05
DO21996_TCGA-AB-2850-03B-01W-0728-08	blood_myeloid	ICGC_WXS_LAML_US_TCGA	FALSE	PROF						FALSE	DO21996	0	TCGA-AB-2850	TRUE	TCGA-AB-2850-03B-01W-0728-08	1.9131e-05	1.99282e-07	3.70672e-06	4.67844e-08	1.69672e-05
DO22032_TCGA-AB-2827-03B-01W-0728-08	blood_myeloid	ICGC_WXS_LAML_US_TCGA	FALSE	PROF					0.224934	FALSE	DO22032	0	TCGA-AB-2827	TRUE	TCGA-AB-2827-03B-01W-0728-08	4.79411e-05	4.99386e-07	1.72641e-06	4.46037e-07	4.99996e-05
DO22038_TCGA-AB-2919-03A-01W-0745-08	blood_myeloid	ICGC_WXS_LAML_US_TCGA	FALSE						0.333607	FALSE	DO22038	0	TCGA-AB-2919	TRUE	TCGA-AB-2919-03A-01W-0745-08	1.07122e-05	1.11586e-07	1.10544e-06	6.83744e-08	1.29967e-05
DO22044_TCGA-AB-2847-03B-01W-0728-08	blood_myeloid	ICGC_WXS_LAML_US_TCGA	FALSE	PROF					0.221002	FALSE	DO22044	0	TCGA-AB-2847	TRUE	TCGA-AB-2847-03B-01W-0728-08	1.81354e-05	1.88911e-07	6.17396e-07	1.70281e-07	1.65846e-05
DO22050_TCGA-AB-2895-03A-01W-0733-08	blood_myeloid	ICGC_WXS_LAML_US_TCGA	FALSE	PROF					0.189888	FALSE	DO22050	0	TCGA-AB-2895	TRUE	TCGA-AB-2895-03A-01W-0733-08	1.82971e-05	1.90595e-07	2.74271e-06	7.96333e-08	1.57359e-05
DO22062_TCGA-AB-2867-03B-01W-0728-08	blood_myeloid	ICGC_WXS_LAML_US_TCGA	FALSE						0.312398	FALSE	DO22062	0	TCGA-AB-2867	TRUE	TCGA-AB-2867-03B-01W-0728-08	9.54123e-05	9.93879e-07	7.78431e-07	1.00325e-06	9.33131e-05
DO22068_TCGA-AB-2914-03A-01W-0732-08	blood_myeloid	ICGC_WXS_LAML_US_TCGA	FALSE						0.315629	FALSE	DO22068	0	TCGA-AB-2914	TRUE	TCGA-AB-2914-03A-01W-0732-08	1.7073e-05	1.77844e-07	1.43603e-06	1.23141e-07	1.92063e-05
DO22074_TCGA-AB-2931-03A-01W-0745-08	blood_myeloid	ICGC_WXS_LAML_US_TCGA	FALSE	PROF					0.139617	FALSE	DO22074	0	TCGA-AB-2931	TRUE	TCGA-AB-2931-03A-01W-0745-08	8.13303e-06	8.47191e-08	2.86812e-07	7.59324e-08	7.88157e-06
DO22098_TCGA-AB-2956-03A-01W-0733-08	blood_myeloid	ICGC_WXS_LAML_US_TCGA	FALSE	PROF					0.191694	FALSE	DO22098	0	TCGA-AB-2956	TRUE	TCGA-AB-2956-03A-01W-0733-08	2.89483e-05	3.01545e-07	0	3.14656e-07	2.72055e-05
DO868_PD3790a	bone	ICGC_WXS_BOCA_UK	FALSE	PROF						FALSE	DO868	0	PD3790a	FALSE		2.51668e-05	2.62154e-07	2.78808e-06	1.52331e-07	2.42031e-05
DO869_PD4912a	bone	ICGC_WXS_BOCA_UK	FALSE	PROF						FALSE	DO869	0	PD4912a	FALSE		1.94235e-05	2.02329e-07	1.27856e-06	1.55536e-07	1.97763e-05
DO871_PD6342a	bone	ICGC_WXS_BOCA_UK	FALSE	PROF						FALSE	DO871	0	PD6342a	FALSE		3.20269e-05	3.33614e-07	2.57316e-06	2.36242e-07	3.29104e-05
DO872_PD6343a	bone	ICGC_WXS_BOCA_UK	FALSE	PROF						FALSE	DO872	0	PD6343a	FALSE		9.62346e-06	1.00244e-07	8.22202e-07	6.88549e-08	1.2646e-05
DO873_PD6344a	bone	ICGC_WXS_BOCA_UK	FALSE	PROF						FALSE	DO873	0	PD6344a	FALSE		1.6097e-06	1.67677e-08	2.86812e-07	5.02662e-09	2.89856e-06
DO874_PD6345a	bone	ICGC_WXS_BOCA_UK	FALSE	PROF						FALSE	DO874	0	PD6345a	FALSE		9.39854e-06	9.79015e-08	4.88048e-07	8.09386e-08	8.44025e-06
DO875_PD6346a	bone	ICGC_WXS_BOCA_UK	FALSE	PROF						FALSE	DO875	0	PD6346a	FALSE		3.39232e-05	3.53367e-07	3.92718e-06	1.97984e-07	3.32101e-05
DO876_PD6349a	bone	ICGC_WXS_BOCA_UK	FALSE	PROF						FALSE	DO876	0	PD6349a	FALSE		4.54565e-07	4.73505e-09	0	4.94092e-09	1.97034e-06
DO877_PD6350a	bone	ICGC_WXS_BOCA_UK	FALSE	PROF						FALSE	DO877	0	PD6350a	FALSE		1.69133e-05	1.7618e-07	2.24615e-06	8.61816e-08	1.49131e-05
DO878_PD6351a	bone	ICGC_WXS_BOCA_UK	FALSE	PROF						FALSE	DO878	0	PD6351a	FALSE		1.72149e-05	1.79322e-07	2.302e-06	8.7032e-08	1.85014e-05
DO879_PD6353a	bone	ICGC_WXS_BOCA_UK	FALSE	PROF						FALSE	DO879	0	PD6353a	FALSE		3.98037e-06	4.14622e-08	6.61167e-07	1.45185e-08	4.74146e-06
DO880_PD6354a	bone	ICGC_WXS_BOCA_UK	FALSE	PROF						FALSE	DO880	0	PD6354a	FALSE		1.72315e-05	1.79495e-07	2.74985e-06	6.77408e-08	1.39365e-05
DO881_PD6355a	bone	ICGC_WXS_BOCA_UK	FALSE	PROF						FALSE	DO881	0	PD6355a	FALSE		2.55383e-05	2.66024e-07	2.28992e-06	1.78028e-07	2.57778e-05
DO882_PD6358a	bone	ICGC_WXS_BOCA_UK	FALSE	PROF						FALSE	DO882	0	PD6358a	FALSE		1.99862e-05	2.0819e-07	1.46771e-06	1.53428e-07	2.00775e-05
DO883_PD6359a	bone	ICGC_WXS_BOCA_UK	FALSE	PROF						FALSE	DO883	0	PD6359a	FALSE		9.50248e-06	9.89842e-08	9.47979e-07	6.20714e-08	1.43611e-05
DO884_PD6360a	bone	ICGC_WXS_BOCA_UK	FALSE	PROF						FALSE	DO884	0	PD6360a	FALSE		1.03765e-05	1.08088e-07	1.47129e-06	4.88188e-08	1.2759e-05
DO885_PD6361a	bone	ICGC_WXS_BOCA_UK	FALSE	PROF						FALSE	DO885	0	PD6361a	FALSE		1.02218e-05	1.06477e-07	1.10544e-06	6.3044e-08	1.24753e-05
DO886_PD6362a	bone	ICGC_WXS_BOCA_UK	FALSE	PROF						FALSE	DO886	0	PD6362a	FALSE		1.29153e-05	1.34535e-07	1.26648e-06	8.53198e-08	1.26815e-05
DO887_PD6363a	bone	ICGC_WXS_BOCA_UK	FALSE	PROF						FALSE	DO887	0	PD6363a	FALSE		2.89501e-05	3.01564e-07	2.58881e-06	2.02118e-07	2.58688e-05
DO888_PD6365a	bone	ICGC_WXS_BOCA_UK	FALSE	PROF						FALSE	DO888	0	PD6365a	FALSE		5.26921e-05	5.48876e-07	6.22067e-06	3.02276e-07	5.82049e-05
DO889_PD6366a	bone	ICGC_WXS_BOCA_UK	FALSE	PROF						FALSE	DO889	0	PD6366a	FALSE		2.72325e-05	2.83672e-07	3.60314e-06	1.39347e-07	2.58093e-05
DO890_PD6367a	bone	ICGC_WXS_BOCA_UK	FALSE	PROF						FALSE	DO890	0	PD6367a	FALSE		2.30126e-05	2.39715e-07	2.70251e-06	1.32637e-07	2.35154e-05
DO891_PD6744a	bone	ICGC_WXS_BOCA_UK	FALSE	PROF						FALSE	DO891	0	PD6744a	FALSE		3.06188e-05	3.18946e-07	3.35159e-06	1.87092e-07	3.18332e-05
DO892_PD6745a	bone	ICGC_WXS_BOCA_UK	FALSE	PROF						FALSE	DO892	0	PD6745a	FALSE		8.30581e-06	8.65188e-08	1.6444e-06	1.87846e-08	8.88402e-06
DO894_PD6746a	bone	ICGC_WXS_BOCA_UK	FALSE	PROF						FALSE	DO894	0	PD6746a	FALSE		2.77032e-05	2.88575e-07	2.59238e-06	1.8841e-07	2.59589e-05
DO896_PD6747a	bone	ICGC_WXS_BOCA_UK	FALSE	PROF						FALSE	DO896	0	PD6747a	FALSE		1.86386e-05	1.94152e-07	1.59706e-06	1.33156e-07	2.04232e-05
DO898_PD6748a	bone	ICGC_WXS_BOCA_UK	FALSE	PROF						FALSE	DO898	0	PD6748a	FALSE		8.03443e-06	8.3692e-08	8.22202e-07	5.15828e-08	6.60621e-06
DO900_PD6749a	bone	ICGC_WXS_BOCA_UK	FALSE	PROF						FALSE	DO900	0	PD6749a	FALSE		4.21631e-05	4.39199e-07	3.20264e-06	3.19049e-07	3.94582e-05
DO902_PD6750a	bone	ICGC_WXS_BOCA_UK	FALSE	PROF						FALSE	DO902	0	PD6750a	FALSE		1.91304e-05	1.99275e-07	1.59349e-06	1.38656e-07	2.36265e-05
DO904_PD6751a	bone	ICGC_WXS_BOCA_UK	FALSE	PROF						FALSE	DO904	0	PD6751a	FALSE		9.10069e-06	9.47988e-08	8.18631e-07	6.33278e-08	1.01767e-05
DO906_PD6752a	bone	ICGC_WXS_BOCA_UK	FALSE	PROF						FALSE	DO906	0	PD6752a	FALSE		1.20808e-05	1.25842e-07	1.31382e-06	7.41902e-08	1.07727e-05
DO908_PD6753a	bone	ICGC_WXS_BOCA_UK	FALSE	PROF						FALSE	DO908	0	PD6753a	FALSE		1.63597e-05	1.70414e-07	1.59706e-06	1.08385e-07	1.5941e-05
DO910_PD6754a	bone	ICGC_WXS_BOCA_UK	FALSE	PROF						FALSE	DO910	0	PD6754a	FALSE		2.95729e-05	3.08051e-07	3.6786e-06	1.61506e-07	2.84317e-05
DO912_PD6755a	bone	ICGC_WXS_BOCA_UK	FALSE	PROF						FALSE	DO912	0	PD6755a	FALSE		2.70672e-05	2.8195e-07	1.59349e-06	2.24927e-07	2.67288e-05
DO914_PD6756a	bone	ICGC_WXS_BOCA_UK	FALSE	PROF						FALSE	DO914	0	PD6756a	FALSE		1.07486e-05	1.11965e-07	9.79667e-07	7.42386e-08	9.50902e-06
DO916_PD6757a	bone	ICGC_WXS_BOCA_UK	FALSE	PROF						FALSE	DO916	0	PD6757a	FALSE		3.54937e-06	3.69726e-08	3.30583e-07	2.42069e-08	2.92826e-06
DO918_PD6759a	bone	ICGC_WXS_BOCA_UK	FALSE	PROF						FALSE	DO918	0	PD6759a	FALSE		1.91441e-05	1.99417e-07	2.21089e-06	1.11962e-07	1.85305e-05
DO920_PD6760a	bone	ICGC_WXS_BOCA_UK	FALSE	PROF						FALSE	DO920	0	PD6760a	FALSE		2.58924e-05	2.69713e-07	1.92765e-06	1.97629e-07	2.49609e-05
DO922_PD6761a	bone	ICGC_WXS_BOCA_UK	FALSE	PROF						FALSE	DO922	0	PD6761a	FALSE		3.33157e-05	3.47039e-07	4.37146e-06	1.72064e-07	3.37432e-05
DO924_PD6762a	bone	ICGC_WXS_BOCA_UK	FALSE	PROF						FALSE	DO924	0	PD6762a	FALSE		6.9202e-06	7.20854e-08	1.59706e-06	5.78204e-09	6.63579e-06
DO926_PD6763a	bone	ICGC_WXS_BOCA_UK	FALSE	PROF						FALSE	DO926	0	PD6763a	FALSE		7.72015e-06	8.04182e-08	3.30583e-07	6.95415e-08	1.25953e-05
DO928_PD6765a	bone	ICGC_WXS_BOCA_UK	FALSE	PROF						FALSE	DO928	0	PD6765a	FALSE		9.75497e-06	1.01614e-07	1.06167e-06	5.98726e-08	9.69386e-06
DO930_PD6767a	bone	ICGC_WXS_BOCA_UK	FALSE	PROF						FALSE	DO930	0	PD6767a	FALSE		1.15308e-06	1.20112e-08	0	1.25335e-08	3.57577e-06
DO932_PD7054a	bone	ICGC_WXS_BOCA_UK	FALSE	PROF						FALSE	DO932	0	PD7054a	FALSE						1.58294e-06
DO936_PD7299a	bone	ICGC_WXS_BOCA_UK	FALSE	PROF						FALSE	DO936	0	PD7299a	FALSE		6.25102e-05	6.51148e-07	3.93373e-06	5.08427e-07	6.37059e-05
DO938_PD7300a	bone	ICGC_WXS_BOCA_UK	FALSE	PROF						FALSE	DO938	0	PD7300a	FALSE		1.89836e-05	1.97746e-07	1.97142e-06	1.2063e-07	1.99956e-05
DO940_PD7301a	bone	ICGC_WXS_BOCA_UK	FALSE	PROF						FALSE	DO940	0	PD7301a	FALSE		1.64997e-05	1.71872e-07	1.06524e-06	1.3303e-07	1.70641e-05
DO942_PD7302a	bone	ICGC_WXS_BOCA_UK	FALSE	PROF						FALSE	DO942	0	PD7302a	FALSE		2.25398e-05	2.3479e-07	2.08154e-06	1.54496e-07	2.23552e-05
DO949_PD9036a	bone	ICGC_WXS_BOCA_UK	FALSE	PROF						FALSE	DO949	0	PD9036a	FALSE		2.92628e-06	3.04821e-08	4.91619e-07	1.04326e-08	2.84854e-06
DO961_PD9042a	bone	ICGC_WXS_BOCA_UK	FALSE	PROF						FALSE	DO961	0	PD9042a	FALSE						1.58294e-06
DO964_PD9044a	bone	ICGC_WXS_BOCA_UK	FALSE	PROF						FALSE	DO964	0	PD9044a	FALSE		1.32233e-06	1.37743e-08	3.30583e-07	0	1.04747e-06
DO976_PD9115a	bone	ICGC_WXS_BOCA_UK	FALSE	PROF						FALSE	DO976	0	PD9115a	FALSE		1.14725e-06	1.19505e-08	2.86812e-07	0	9.15285e-07
DO985_PD9394a	bone	ICGC_WXS_BOCA_UK	FALSE	PROF						FALSE	DO985	0	PD9394a	FALSE						2.19398e-06
DO991_PD9610a	bone	ICGC_WXS_BOCA_UK	FALSE	PROF						FALSE	DO991	0	PD9610a	FALSE						1.58294e-06
DO994_PD9611a	bone	ICGC_WXS_BOCA_UK	FALSE	PROF						FALSE	DO994	0	PD9611a	FALSE						1.58294e-06
DO10871_TCGA-12-1598-01A-01W-0643-08	brain	ICGC_WXS_GBM_US_TCGA	FALSE	PROF					0.0413664	FALSE	DO10871	0	TCGA-12-1598	TRUE	TCGA-12-1598-01A-01W-0643-08	6.51414e-05	6.78556e-07	8.87881e-06	3.22023e-07	6.52412e-05
DO10873_TCGA-02-0055-01A-01D-1490-08	brain	ICGC_WXS_GBM_US_TCGA	FALSE	PROF					0.111615	FALSE	DO10873	0	TCGA-02-0055	TRUE	TCGA-02-0055-01A-01D-1490-08	6.27734e-05	6.5389e-07	1.06892e-05	2.17572e-07	6.69043e-05
DO10874_TCGA-41-2575-01A-01D-1495-08	brain	ICGC_WXS_GBM_US_TCGA	FALSE	PROF					0.0427712	FALSE	DO10874	0	TCGA-41-2575	TRUE	TCGA-41-2575-01A-01D-1495-08	5.21038e-05	5.42748e-07	6.66631e-06	2.76506e-07	5.82465e-05
DO10875_TCGA-14-0736-01A-01D-2280-08	brain	ICGC_WXS_GBM_US_TCGA	FALSE	PROF					0.124717	FALSE	DO10875	0	TCGA-14-0736	TRUE	TCGA-14-0736-01A-01D-2280-08	6.3097e-05	6.57261e-07	1.00489e-05	2.48931e-07	6.25215e-05
DO10875_TCGA-14-0736-02A-01D-2280-08	brain	ICGC_WXS_GBM_US_TCGA	FALSE	PROF					0.124717	FALSE	DO10875	0	TCGA-14-0736	TRUE	TCGA-14-0736-02A-01D-2280-08	4.82631e-05	5.02741e-07	7.90985e-06	1.80692e-07	4.68178e-05
DO10880_TCGA-06-5416-01A-01D-1486-08	brain	ICGC_WXS_GBM_US_TCGA	FALSE	POLEd	V411L				0.101501	FALSE	DO10880	0	TCGA-06-5416	TRUE	TCGA-06-5416-01A-01D-1486-08	0.0148034	0.000154202	0.00239353	5.68399e-05	0.0144359
DO10882_TCGA-28-2509-01A-01D-1494-08	brain	ICGC_WXS_GBM_US_TCGA	FALSE	PROF					0.0901287	FALSE	DO10882	0	TCGA-28-2509	TRUE	TCGA-28-2509-01A-01D-1494-08	5.81951e-05	6.06199e-07	9.52985e-06	2.18214e-07	5.95655e-05
DO10886_TCGA-06-0173-01A-01D-1491-08	brain	ICGC_WXS_GBM_US_TCGA	FALSE	PROF						FALSE	DO10886	0	TCGA-06-0173	TRUE	TCGA-06-0173-01A-01D-1491-08	8.25481e-05	8.59877e-07	1.33675e-05	3.16066e-07	7.75023e-05
DO10888_TCGA-28-5220-01A-01D-1486-08	brain	ICGC_WXS_GBM_US_TCGA	FALSE	PROF					0.113225	FALSE	DO10888	0	TCGA-28-5220	TRUE	TCGA-28-5220-01A-01D-1486-08	3.82126e-05	3.98048e-07	5.5399e-06	1.74489e-07	3.51967e-05
DO10892_TCGA-06-5858-01A-01D-1696-08	brain	ICGC_WXS_GBM_US_TCGA	FALSE	PROF					0.112897	FALSE	DO10892	0	TCGA-06-5858	TRUE	TCGA-06-5858-01A-01D-1696-08	0.000294813	3.07097e-06	6.92891e-05	1.91919e-07	0.000287158
DO10898_TCGA-76-6193-01A-11D-1696-08	brain	ICGC_WXS_GBM_US_TCGA	FALSE	PROF					0.11805	FALSE	DO10898	0	TCGA-76-6193	TRUE	TCGA-76-6193-01A-11D-1696-08	4.92252e-05	5.12763e-07	7.04227e-06	2.28871e-07	4.47313e-05
DO10900_TCGA-14-0786-01B-01D-1492-08	brain	ICGC_WXS_GBM_US_TCGA	FALSE	PROF					0.121992	FALSE	DO10900	0	TCGA-14-0786	TRUE	TCGA-14-0786-01B-01D-1492-08	3.95534e-05	4.12015e-07	6.2795e-06	1.56907e-07	3.71726e-05
DO10902_TCGA-19-1386-01A-01W-0643-08	brain	ICGC_WXS_GBM_US_TCGA	FALSE	PROF					0.143667	FALSE	DO10902	0	TCGA-19-1386	TRUE	TCGA-19-1386-01A-01W-0643-08	0.00012541	1.30636e-06	9.66474e-06	9.42948e-07	0.000122447
DO10906_TCGA-28-2514-01A-02D-1494-08	brain	ICGC_WXS_GBM_US_TCGA	FALSE	PROF					0.0432662	FALSE	DO10906	0	TCGA-28-2514	TRUE	TCGA-28-2514-01A-02D-1494-08	6.04317e-05	6.29497e-07	1.14856e-05	1.57491e-07	6.53777e-05
DO10908_TCGA-27-2523-01A-01D-1494-08	brain	ICGC_WXS_GBM_US_TCGA	FALSE	PROF					0.0594759	FALSE	DO10908	0	TCGA-27-2523	TRUE	TCGA-27-2523-01A-01D-1494-08	5.12545e-05	5.33901e-07	8.26141e-06	1.97922e-07	5.65449e-05
DO10912_TCGA-27-1832-01A-01D-1494-08	brain	ICGC_WXS_GBM_US_TCGA	FALSE	PROF					0.10255	FALSE	DO10912	0	TCGA-27-1832	TRUE	TCGA-27-1832-01A-01D-1494-08	3.5021e-05	3.64802e-07	6.00675e-06	1.195e-07	4.00197e-05
DO10930_TCGA-28-1750-01A-01W-0643-08	brain	ICGC_WXS_GBM_US_TCGA	FALSE	PROF					0.0897658	FALSE	DO10930	0	TCGA-28-1750	TRUE	TCGA-28-1750-01A-01W-0643-08	8.30259e-05	8.64853e-07	7.11934e-06	5.92919e-07	7.42052e-05
DO10955_TCGA-32-1982-01A-01D-1494-08	brain	ICGC_WXS_GBM_US_TCGA	FALSE	PROF					0.106979	FALSE	DO10955	0	TCGA-32-1982	TRUE	TCGA-32-1982-01A-01D-1494-08	8.6223e-05	8.98156e-07	1.67926e-05	2.07094e-07	8.87733e-05
DO10960_TCGA-06-0214-01A-02D-1491-08	brain	ICGC_WXS_GBM_US_TCGA	FALSE	PROF						FALSE	DO10960	0	TCGA-06-0214	TRUE	TCGA-06-0214-01A-02D-1491-08	8.01455e-05	8.34849e-07	1.22238e-05	3.39676e-07	7.87905e-05
DO10965_TCGA-76-6282-01A-11D-1696-08	brain	ICGC_WXS_GBM_US_TCGA	FALSE	PROF					0.131778	FALSE	DO10965	0	TCGA-76-6282	TRUE	TCGA-76-6282-01A-11D-1696-08	4.95359e-05	5.15998e-07	7.6159e-06	2.07307e-07	4.74736e-05
DO10975_TCGA-06-0190-01A-01D-1491-08	brain	ICGC_WXS_GBM_US_TCGA	FALSE	PROF					0.136064	FALSE	DO10975	0	TCGA-06-0190	TRUE	TCGA-06-0190-01A-01D-1491-08	7.49577e-05	7.8081e-07	1.55473e-05	1.38787e-07	7.8836e-05
DO10975_TCGA-06-0190-02A-01D-2280-08	brain	ICGC_WXS_GBM_US_TCGA	FALSE	PROF					0.136064	FALSE	DO10975	0	TCGA-06-0190	TRUE	TCGA-06-0190-02A-01D-2280-08	0.000108117	1.12622e-06	1.52167e-05	5.1359e-07	0.000107233
DO10986_TCGA-14-0865-01B-01W-0643-08	brain	ICGC_WXS_GBM_US_TCGA	FALSE	PROF					0.0317341	FALSE	DO10986	0	TCGA-14-0865	TRUE	TCGA-14-0865-01B-01W-0643-08	6.10258e-05	6.35685e-07	6.43559e-06	3.83515e-07	5.86357e-05
DO10992_TCGA-06-0185-01A-01D-1491-08	brain	ICGC_WXS_GBM_US_TCGA	FALSE	PROF						FALSE	DO10992	0	TCGA-06-0185	TRUE	TCGA-06-0185-01A-01D-1491-08	6.87695e-05	7.16349e-07	1.26727e-05	1.96507e-07	6.69334e-05
DO11004_TCGA-02-0003-01A-01D-1490-08	brain	ICGC_WXS_GBM_US_TCGA	FALSE	PROF					0.0760067	FALSE	DO11004	0	TCGA-02-0003	TRUE	TCGA-02-0003-01A-01D-1490-08	5.10784e-05	5.32066e-07	8.37867e-06	1.90909e-07	5.77485e-05
DO11016_TCGA-28-5211-01C-11D-1845-08	brain	ICGC_WXS_GBM_US_TCGA	FALSE	PROF					0.15053	FALSE	DO11016	0	TCGA-28-5211	TRUE	TCGA-28-5211-01C-11D-1845-08	0.000325186	3.38736e-06	8.97881e-06	3.14425e-06	0.000316438
DO11022_TCGA-06-0648-01A-01D-1492-08	brain	ICGC_WXS_GBM_US_TCGA	FALSE	PROF						FALSE	DO11022	0	TCGA-06-0648	TRUE	TCGA-06-0648-01A-01D-1492-08	6.37683e-05	6.64253e-07	1.00698e-05	2.55315e-07	6.45879e-05
DO11028_TCGA-19-0957-01C-01W-0643-08	brain	ICGC_WXS_GBM_US_TCGA	FALSE	PROF					0.0809917	FALSE	DO11028	0	TCGA-19-0957	TRUE	TCGA-19-0957-01C-01W-0643-08	0.000126715	1.31995e-06	1.48665e-05	7.30965e-07	0.000126393
DO11034_TCGA-12-1602-01A-01W-0643-08	brain	ICGC_WXS_GBM_US_TCGA	FALSE	PROF					0.0452387	FALSE	DO11034	0	TCGA-12-1602	TRUE	TCGA-12-1602-01A-01W-0643-08	5.76121e-05	6.00126e-07	9.25733e-06	2.23726e-07	5.22764e-05
DO11046_TCGA-19-2629-01A-01D-1495-08	brain	ICGC_WXS_GBM_US_TCGA	FALSE	PROF					0.0765629	FALSE	DO11046	0	TCGA-19-2629	TRUE	TCGA-19-2629-01A-01D-1495-08	6.3514e-05	6.61604e-07	7.97976e-06	3.43424e-07	6.23424e-05
DO11052_TCGA-06-6694-01A-12D-1845-08	brain	ICGC_WXS_GBM_US_TCGA	FALSE	PROF					0.1255	FALSE	DO11052	0	TCGA-06-6694	TRUE	TCGA-06-6694-01A-12D-1845-08	9.34289e-05	9.73218e-07	1.46041e-05	3.80572e-07	9.25583e-05
DO11064_TCGA-12-0822-01A-01W-0424-08	brain	ICGC_WXS_GBM_US_TCGA	FALSE	PROF					0.125368	FALSE	DO11064	0	TCGA-12-0822	TRUE	TCGA-12-0822-01A-01W-0424-08	5.81307e-05	6.05528e-07	5.45729e-06	3.94581e-07	6.08741e-05
DO11076_TCGA-26-6174-01A-21D-1845-08	brain	ICGC_WXS_GBM_US_TCGA	FALSE	PROF					0.12899	FALSE	DO11076	0	TCGA-26-6174	TRUE	TCGA-26-6174-01A-21D-1845-08	8.07725e-05	8.41381e-07	1.06706e-05	4.14025e-07	8.50709e-05
DO11082_TCGA-76-6661-01B-11D-1845-08	brain	ICGC_WXS_GBM_US_TCGA	FALSE	PROF					0.152635	FALSE	DO11082	0	TCGA-76-6661	TRUE	TCGA-76-6661-01B-11D-1845-08	5.32035e-05	5.54203e-07	8.75142e-06	1.97802e-07	5.97899e-05
DO11088_TCGA-12-0688-01A-02D-1492-08	brain	ICGC_WXS_GBM_US_TCGA	FALSE	PROF						FALSE	DO11088	0	TCGA-12-0688	TRUE	TCGA-12-0688-01A-02D-1492-08	6.086e-05	6.33959e-07	9.77647e-06	2.36458e-07	6.47883e-05
DO11100_TCGA-19-2621-01B-01W-0922-08	brain	ICGC_WXS_GBM_US_TCGA	FALSE	PROF					0.0437098	FALSE	DO11100	0	TCGA-19-2621	TRUE	TCGA-19-2621-01B-01W-0922-08	0.000125569	1.30801e-06	1.07718e-05	8.96543e-07	0.000126354
DO11106_TCGA-06-1084-01A-01W-0611-08	brain	ICGC_WXS_GBM_US_TCGA	FALSE	PROF					0.149689	FALSE	DO11106	0	TCGA-06-1084	TRUE	TCGA-06-1084-01A-01W-0611-08	7.1303e-05	7.4274e-07	3.88341e-06	6.06189e-07	6.57494e-05
DO11112_TCGA-87-5896-01A-01D-1696-08	brain	ICGC_WXS_GBM_US_TCGA	FALSE	PROF					0.111113	FALSE	DO11112	0	TCGA-87-5896	TRUE	TCGA-87-5896-01A-01D-1696-08	6.15645e-05	6.41297e-07	1.09574e-05	1.92772e-07	6.46069e-05
DO11124_TCGA-06-2558-01A-01D-1494-08	brain	ICGC_WXS_GBM_US_TCGA	FALSE	PROF					0.0589112	FALSE	DO11124	0	TCGA-06-2558	TRUE	TCGA-06-2558-01A-01D-1494-08	8.65354e-05	9.01411e-07	1.36406e-05	3.47531e-07	8.88753e-05
DO11136_TCGA-74-6573-01A-12D-1845-08	brain	ICGC_WXS_GBM_US_TCGA	FALSE	PROF					0.133264	FALSE	DO11136	0	TCGA-74-6573	TRUE	TCGA-74-6573-01A-12D-1845-08	5.14248e-05	5.35675e-07	8.90752e-06	1.71682e-07	5.06052e-05
DO11142_TCGA-06-0649-01B-01D-1492-08	brain	ICGC_WXS_GBM_US_TCGA	FALSE	PROF						FALSE	DO11142	0	TCGA-06-0649	TRUE	TCGA-06-0649-01B-01D-1492-08	0.000123358	1.28498e-06	9.74478e-06	9.17159e-07	0.000122398
DO11148_TCGA-14-1034-01A-01D-1492-08	brain	ICGC_WXS_GBM_US_TCGA	FALSE	PROF					0.110025	FALSE	DO11148	0	TCGA-14-1034	TRUE	TCGA-14-1034-01A-01D-1492-08	8.95379e-05	9.32687e-07	1.76691e-05	2.05018e-07	9.37319e-05
DO11148_TCGA-14-1034-02B-01D-2280-08	brain	ICGC_WXS_GBM_US_TCGA	FALSE	PROF					0.110025	FALSE	DO11148	0	TCGA-14-1034	TRUE	TCGA-14-1034-02B-01D-2280-08	9.75751e-05	1.01641e-06	1.78859e-05	2.82949e-07	9.69816e-05
DO11154_TCGA-76-6657-01A-11D-1845-08	brain	ICGC_WXS_GBM_US_TCGA	FALSE	PROF					0.131644	FALSE	DO11154	0	TCGA-76-6657	TRUE	TCGA-76-6657-01A-11D-1845-08	5.93452e-05	6.18179e-07	9.99139e-06	2.10648e-07	5.46359e-05
DO11166_TCGA-12-0829-01A-01W-0424-08	brain	ICGC_WXS_GBM_US_TCGA	FALSE	PROF					0.137853	FALSE	DO11166	0	TCGA-12-0829	TRUE	TCGA-12-0829-01A-01W-0424-08	0.00048752	5.07834e-06	1.81868e-05	4.5084e-06	0.000479885
DO11172_TCGA-32-2615-01A-01D-1495-08	brain	ICGC_WXS_GBM_US_TCGA	FALSE	PROF					0.0633825	FALSE	DO11172	0	TCGA-32-2615	TRUE	TCGA-32-2615-01A-01D-1495-08	4.55393e-05	4.74367e-07	8.7322e-06	1.15331e-07	4.29553e-05
DO11178_TCGA-28-5219-01A-01D-1486-08	brain	ICGC_WXS_GBM_US_TCGA	FALSE	PROF					0.111028	FALSE	DO11178	0	TCGA-28-5219	TRUE	TCGA-28-5219-01A-01D-1486-08	5.59431e-05	5.82741e-07	1.01352e-05	1.67418e-07	5.82703e-05
DO11196_TCGA-76-4935-01A-01D-1486-08	brain	ICGC_WXS_GBM_US_TCGA	FALSE	PROF					0.110294	FALSE	DO11196	0	TCGA-76-4935	TRUE	TCGA-76-4935-01A-01D-1486-08	5.9376e-05	6.185e-07	9.58434e-06	2.28681e-07	5.68479e-05
DO11202_TCGA-14-2554-01A-01D-1494-08	brain	ICGC_WXS_GBM_US_TCGA	FALSE	PROF					0.10102	FALSE	DO11202	0	TCGA-14-2554	TRUE	TCGA-14-2554-01A-01D-1494-08	8.18683e-05	8.52795e-07	1.3917e-05	2.84787e-07	8.08608e-05
DO11208_TCGA-27-1835-01A-01D-1494-08	brain	ICGC_WXS_GBM_US_TCGA	FALSE	PROF					0.0529182	FALSE	DO11208	0	TCGA-27-1835	TRUE	TCGA-27-1835-01A-01D-1494-08	6.40402e-05	6.67086e-07	9.55797e-06	2.80525e-07	6.81504e-05
DO11238_TCGA-06-0152-01A-02D-1492-08	brain	ICGC_WXS_GBM_US_TCGA	FALSE	PROF					0.135853	FALSE	DO11238	0	TCGA-06-0152	TRUE	TCGA-06-0152-01A-02D-1492-08	7.14202e-05	7.4396e-07	1.17705e-05	2.64547e-07	6.67095e-05
DO11238_TCGA-06-0152-02A-01D-2280-08	brain	ICGC_WXS_GBM_US_TCGA	FALSE	PROF					0.135853	FALSE	DO11238	0	TCGA-06-0152	TRUE	TCGA-06-0152-02A-01D-2280-08	7.99742e-05	8.33065e-07	1.44521e-05	2.40931e-07	8.14939e-05
DO11280_TCGA-28-5209-01A-01D-1486-08	brain	ICGC_WXS_GBM_US_TCGA	FALSE	PROF					0.119588	FALSE	DO11280	0	TCGA-28-5209	TRUE	TCGA-28-5209-01A-01D-1486-08	8.94887e-05	9.32174e-07	1.62063e-05	2.68083e-07	9.76058e-05
DO11292_TCGA-06-0155-01B-01D-1492-08	brain	ICGC_WXS_GBM_US_TCGA	FALSE	PROF					0.0730208	FALSE	DO11292	0	TCGA-06-0155	TRUE	TCGA-06-0155-01B-01D-1492-08	8.12042e-05	8.45877e-07	1.31278e-05	3.1188e-07	8.12568e-05
DO11298_TCGA-12-0691-01A-01W-0348-08	brain	ICGC_WXS_GBM_US_TCGA	FALSE	PROF						FALSE	DO11298	0	TCGA-12-0691	TRUE	TCGA-12-0691-01A-01W-0348-08	5.96656e-05	6.21517e-07	7.6741e-06	3.14883e-07	6.10122e-05
DO11310_TCGA-76-6664-01A-11D-1845-08	brain	ICGC_WXS_GBM_US_TCGA	FALSE	PROF					0.152518	FALSE	DO11310	0	TCGA-76-6664	TRUE	TCGA-76-6664-01A-11D-1845-08	5.51968e-05	5.74967e-07	9.55601e-06	1.84487e-07	5.94534e-05
DO11316_TCGA-28-5207-01A-01D-1486-08	brain	ICGC_WXS_GBM_US_TCGA	FALSE	PROF					0.125146	FALSE	DO11316	0	TCGA-28-5207	TRUE	TCGA-28-5207-01A-01D-1486-08	5.29377e-05	5.51434e-07	6.98642e-06	2.71652e-07	4.93034e-05
DO11322_TCGA-12-0615-01A-01D-1492-08	brain	ICGC_WXS_GBM_US_TCGA	FALSE	PROF						FALSE	DO11322	0	TCGA-12-0615	TRUE	TCGA-12-0615-01A-01D-1492-08	7.47505e-05	7.78651e-07	1.22203e-05	2.81189e-07	7.23167e-05
DO11346_TCGA-19-2625-01A-01D-1495-08	brain	ICGC_WXS_GBM_US_TCGA	FALSE	PROF					0.138577	FALSE	DO11346	0	TCGA-19-2625	TRUE	TCGA-19-2625-01A-01D-1495-08	5.89827e-05	6.14404e-07	7.85436e-06	2.99623e-07	5.62084e-05
DO11352_TCGA-32-4208-01A-01D-1353-08	brain	ICGC_WXS_GBM_US_TCGA	FALSE	PROF					0.0746103	FALSE	DO11352	0	TCGA-32-4208	TRUE	TCGA-32-4208-01A-01D-1353-08	3.02801e-05	3.15418e-07	3.20621e-06	1.89731e-07	3.28849e-05
DO11358_TCGA-12-0662-01A-01W-0348-08	brain	ICGC_WXS_GBM_US_TCGA	FALSE	PROF						FALSE	DO11358	0	TCGA-12-0662	TRUE	TCGA-12-0662-01A-01W-0348-08	2.88895e-05	3.00933e-07	4.58638e-06	1.14609e-07	2.64746e-05
DO11382_TCGA-06-0171-01A-02D-1491-08	brain	ICGC_WXS_GBM_US_TCGA	FALSE	PROF					0.133412	FALSE	DO11382	0	TCGA-06-0171	TRUE	TCGA-06-0171-01A-02D-1491-08	6.30164e-05	6.56421e-07	1.11586e-05	1.99804e-07	5.98776e-05
DO11382_TCGA-06-0171-02A-11D-2280-08	brain	ICGC_WXS_GBM_US_TCGA	FALSE	PROF					0.133412	FALSE	DO11382	0	TCGA-06-0171	TRUE	TCGA-06-0171-02A-11D-2280-08	4.34023e-05	4.52107e-07	8.5381e-06	1.00542e-07	3.90635e-05
DO11388_TCGA-06-0216-01B-01D-1492-08	brain	ICGC_WXS_GBM_US_TCGA	FALSE	PROF						FALSE	DO11388	0	TCGA-06-0216	TRUE	TCGA-06-0216-01B-01D-1492-08	6.61492e-05	6.89054e-07	1.02081e-05	2.75184e-07	5.82535e-05
DO11394_TCGA-06-0166-01A-01D-1491-08	brain	ICGC_WXS_GBM_US_TCGA	FALSE	PROF						FALSE	DO11394	0	TCGA-06-0166	TRUE	TCGA-06-0166-01A-01D-1491-08	3.57232e-05	3.72116e-07	5.35112e-06	1.55638e-07	3.65598e-05
DO11406_TCGA-32-4719-01A-01D-1353-08	brain	ICGC_WXS_GBM_US_TCGA	FALSE	PROF					0.0990977	FALSE	DO11406	0	TCGA-32-4719	TRUE	TCGA-32-4719-01A-01D-1353-08	5.29441e-05	5.51501e-07	9.66277e-06	1.55359e-07	5.73215e-05
DO11411_TCGA-12-0778-01A-01W-0348-08	brain	ICGC_WXS_GBM_US_TCGA	FALSE	PROF						FALSE	DO11411	0	TCGA-12-0778	TRUE	TCGA-12-0778-01A-01W-0348-08	0.000261606	2.72507e-06	1.74959e-05	2.08285e-06	0.000255116
DO11417_TCGA-14-3476-01B-01D-1353-08	brain	ICGC_WXS_GBM_US_TCGA	FALSE	PROF					0.102944	FALSE	DO11417	0	TCGA-14-3476	TRUE	TCGA-14-3476-01B-01D-1353-08	6.70937e-05	6.98893e-07	1.01293e-05	2.88877e-07	6.60933e-05
DO11423_TCGA-28-1749-01A-01W-0643-08	brain	ICGC_WXS_GBM_US_TCGA	FALSE	PROF					0.13908	FALSE	DO11423	0	TCGA-28-1749	TRUE	TCGA-28-1749-01A-01W-0643-08	5.53659e-05	5.76728e-07	9.48448e-06	1.89434e-07	6.00477e-05
DO11429_TCGA-14-1396-01A-01W-0611-08	brain	ICGC_WXS_GBM_US_TCGA	FALSE	PROF					0.0812485	FALSE	DO11429	0	TCGA-14-1396	TRUE	TCGA-14-1396-01A-01W-0611-08	0.000233426	2.43153e-06	1.19442e-05	2.01793e-06	0.000236657
DO11435_TCGA-81-5910-01A-11D-1696-08	brain	ICGC_WXS_GBM_US_TCGA	FALSE	PROF					0.116963	FALSE	DO11435	0	TCGA-81-5910	TRUE	TCGA-81-5910-01A-11D-1696-08	5.41541e-05	5.64105e-07	1.01122e-05	1.48969e-07	5.4122e-05
DO11447_TCGA-26-5135-01A-01D-1486-08	brain	ICGC_WXS_GBM_US_TCGA	FALSE	PROF					0.119386	FALSE	DO11447	0	TCGA-26-5135	TRUE	TCGA-26-5135-01A-01D-1486-08	7.81721e-05	8.14292e-07	1.55647e-05	1.72969e-07	7.28115e-05
DO11459_TCGA-19-5954-01A-11D-1696-08	brain	ICGC_WXS_GBM_US_TCGA	FALSE	PROF					0.121019	FALSE	DO11459	0	TCGA-19-5954	TRUE	TCGA-19-5954-01A-11D-1696-08	7.30771e-05	7.6122e-07	1.14238e-05	2.97627e-07	8.17617e-05
DO11465_TCGA-41-2572-01A-01D-1353-08	brain	ICGC_WXS_GBM_US_TCGA	FALSE	PROF					0.079485	FALSE	DO11465	0	TCGA-41-2572	TRUE	TCGA-41-2572-01A-01D-1353-08	6.67318e-05	6.95123e-07	1.09992e-05	2.47121e-07	7.36955e-05
DO11471_TCGA-26-5136-01B-01D-1486-08	brain	ICGC_WXS_GBM_US_TCGA	FALSE	PROF					0.113473	FALSE	DO11471	0	TCGA-26-5136	TRUE	TCGA-26-5136-01B-01D-1486-08	4.86558e-05	5.06831e-07	8.29149e-06	1.68367e-07	5.71598e-05
DO11477_TCGA-14-1043-01B-11D-1845-08	brain	ICGC_WXS_GBM_US_TCGA	FALSE	PROF					0.17576	FALSE	DO11477	0	TCGA-14-1043	TRUE	TCGA-14-1043-01B-11D-1845-08	2.56469e-05	2.67155e-07	3.60017e-06	1.22242e-07	2.2682e-05
DO11483_TCGA-32-4213-01A-01D-1353-08	brain	ICGC_WXS_GBM_US_TCGA	FALSE	PROF					0.131883	FALSE	DO11483	0	TCGA-32-4213	TRUE	TCGA-32-4213-01A-01D-1353-08	5.50042e-05	5.72961e-07	8.18792e-06	2.41876e-07	6.12507e-05
DO11489_TCGA-19-1791-01A-01W-0643-08	brain	ICGC_WXS_GBM_US_TCGA	FALSE	PROF					0.0375027	FALSE	DO11489	0	TCGA-19-1791	TRUE	TCGA-19-1791-01A-01W-0643-08	7.35799e-05	7.66457e-07	5.81564e-06	5.46928e-07	8.24937e-05
DO11501_TCGA-41-5651-01A-01D-1696-08	brain	ICGC_WXS_GBM_US_TCGA	FALSE	PROF					0.129439	FALSE	DO11501	0	TCGA-41-5651	TRUE	TCGA-41-5651-01A-01D-1696-08	9.32893e-05	9.71763e-07	1.6026e-05	3.1723e-07	9.93231e-05
DO11507_TCGA-06-2566-01A-01W-0837-08	brain	ICGC_WXS_GBM_US_TCGA	FALSE	PROF					0.142456	FALSE	DO11507	0	TCGA-06-2566	TRUE	TCGA-06-2566-01A-01W-0837-08	0.000163177	1.69976e-06	3.85886e-06	1.60589e-06	0.00016051
DO11513_TCGA-28-5216-01A-01D-1486-08	brain	ICGC_WXS_GBM_US_TCGA	FALSE	PROF					0.106596	FALSE	DO11513	0	TCGA-28-5216	TRUE	TCGA-28-5216-01A-01D-1486-08	4.87814e-05	5.08139e-07	6.62254e-06	2.42296e-07	4.7274e-05
DO11519_TCGA-06-0126-01A-01D-1490-08	brain	ICGC_WXS_GBM_US_TCGA	FALSE	PROF					0.150866	FALSE	DO11519	0	TCGA-06-0126	TRUE	TCGA-06-0126-01A-01D-1490-08	5.57035e-05	5.80245e-07	7.72959e-06	2.69404e-07	6.17736e-05
DO11525_TCGA-06-2563-01A-01D-1494-08	brain	ICGC_WXS_GBM_US_TCGA	FALSE	PROF					0.208842	FALSE	DO11525	0	TCGA-06-2563	TRUE	TCGA-06-2563-01A-01D-1494-08	7.52524e-05	7.83879e-07	1.13807e-05	3.23149e-07	7.57313e-05
DO11531_TCGA-74-6581-01A-11D-1845-08	brain	ICGC_WXS_GBM_US_TCGA	FALSE	PROF					0.128132	FALSE	DO11531	0	TCGA-74-6581	TRUE	TCGA-74-6581-01A-11D-1845-08	5.04418e-05	5.25435e-07	8.70271e-06	1.69901e-07	5.39352e-05
DO11537_TCGA-06-0129-01A-01D-1490-08	brain	ICGC_WXS_GBM_US_TCGA	FALSE	PROF					0.10325	FALSE	DO11537	0	TCGA-06-0129	TRUE	TCGA-06-0129-01A-01D-1490-08	2.90855e-05	3.02974e-07	4.96073e-06	1.00463e-07	3.05432e-05
DO11549_TCGA-06-1087-01A-02W-0611-08	brain	ICGC_WXS_GBM_US_TCGA	FALSE	PROF					0.0426026	FALSE	DO11549	0	TCGA-06-1087	TRUE	TCGA-06-1087-01A-02W-0611-08	8.78005e-05	9.14589e-07	9.37596e-06	5.46703e-07	8.05445e-05
DO11567_TCGA-06-1805-01A-01W-0643-08	brain	ICGC_WXS_GBM_US_TCGA	FALSE	PROF					0.0589118	FALSE	DO11567	0	TCGA-06-1805	TRUE	TCGA-06-1805-01A-01W-0643-08	0.000231749	2.41405e-06	4.02287e-06	2.3441e-06	0.000232104
DO11573_TCGA-19-1387-01A-01W-0643-08	brain	ICGC_WXS_GBM_US_TCGA	FALSE	PROF					0.0441003	FALSE	DO11573	0	TCGA-19-1387	TRUE	TCGA-19-1387-01A-01W-0643-08	9.05118e-05	9.42831e-07	8.66745e-06	6.06978e-07	9.61758e-05
DO11585_TCGA-28-2506-01A-02W-0837-08	brain	ICGC_WXS_GBM_US_TCGA	FALSE	PROF					0.075117	FALSE	DO11585	0	TCGA-28-2506	TRUE	TCGA-28-2506-01A-02W-0837-08	0.000251834	2.62327e-06	8.89309e-06	2.35067e-06	0.000247692
DO11591_TCGA-19-4065-01A-01D-2280-08	brain	ICGC_WXS_GBM_US_TCGA	FALSE	PROF					0.1246	FALSE	DO11591	0	TCGA-19-4065	TRUE	TCGA-19-4065-01A-01D-2280-08	5.47606e-05	5.70423e-07	9.73627e-06	1.71908e-07	5.47921e-05
DO11591_TCGA-19-4065-02A-11D-2280-08	brain	ICGC_WXS_GBM_US_TCGA	FALSE	PROF					0.1246	FALSE	DO11591	0	TCGA-19-4065	TRUE	TCGA-19-4065-02A-11D-2280-08	9.75154e-05	1.01579e-06	9.08361e-06	6.6501e-07	8.99639e-05
DO11603_TCGA-26-1799-01A-02W-0643-08	brain	ICGC_WXS_GBM_US_TCGA	FALSE	PROF					0.0526983	FALSE	DO11603	0	TCGA-26-1799	TRUE	TCGA-26-1799-01A-02W-0643-08	7.45884e-05	7.76962e-07	1.03279e-05	3.61705e-07	7.64496e-05
DO11621_TCGA-06-6697-01A-11D-1845-08	brain	ICGC_WXS_GBM_US_TCGA	FALSE	PROF					0.151504	FALSE	DO11621	0	TCGA-06-6697	TRUE	TCGA-06-6697-01A-11D-1845-08	5.53917e-05	5.76997e-07	7.56004e-06	2.73386e-07	5.95647e-05
DO11627_TCGA-76-6663-01A-11D-1845-08	brain	ICGC_WXS_GBM_US_TCGA	FALSE	PROF					0.147009	FALSE	DO11627	0	TCGA-76-6663	TRUE	TCGA-76-6663-01A-11D-1845-08	6.23265e-05	6.49234e-07	1.08839e-05	2.0425e-07	6.70054e-05
DO11639_TCGA-12-0773-01A-01W-0348-08	brain	ICGC_WXS_GBM_US_TCGA	FALSE	PROF						FALSE	DO11639	0	TCGA-12-0773	TRUE	TCGA-12-0773-01A-01W-0348-08	5.53885e-05	5.76963e-07	7.04942e-06	2.95552e-07	6.3296e-05
DO11645_TCGA-32-4210-01A-01D-1353-08	brain	ICGC_WXS_GBM_US_TCGA	FALSE	PROF					0.0656634	FALSE	DO11645	0	TCGA-32-4210	TRUE	TCGA-32-4210-01A-01D-1353-08	7.82927e-05	8.15549e-07	1.16492e-05	3.44518e-07	7.85168e-05
DO11651_TCGA-19-5959-01A-11D-1696-08	brain	ICGC_WXS_GBM_US_TCGA	FALSE	PROF					0.112717	FALSE	DO11651	0	TCGA-19-5959	TRUE	TCGA-19-5959-01A-11D-1696-08	0.000106565	1.11005e-06	2.13807e-05	2.28716e-07	0.000101978
DO11657_TCGA-74-6575-01A-11D-1845-08	brain	ICGC_WXS_GBM_US_TCGA	FALSE	PROF					0.132791	FALSE	DO11657	0	TCGA-74-6575	TRUE	TCGA-74-6575-01A-11D-1845-08	0.000106105	1.10526e-06	1.69204e-05	4.17642e-07	0.000108351
DO11669_TCGA-02-0047-01A-01D-1490-08	brain	ICGC_WXS_GBM_US_TCGA	FALSE	PROF					0.113679	FALSE	DO11669	0	TCGA-02-0047	TRUE	TCGA-02-0047-01A-01D-1490-08	6.4507e-05	6.71948e-07	9.37757e-06	2.93443e-07	6.66377e-05
DO11675_TCGA-14-0867-01A-01W-0424-08	brain	ICGC_WXS_GBM_US_TCGA	FALSE	PROF					0.0476352	FALSE	DO11675	0	TCGA-14-0867	TRUE	TCGA-14-0867-01A-01W-0424-08	9.15612e-05	9.53762e-07	9.81113e-06	5.68659e-07	9.41876e-05
DO11681_TCGA-76-6662-01A-11D-1845-08	brain	ICGC_WXS_GBM_US_TCGA	FALSE	PROF					0.151925	FALSE	DO11681	0	TCGA-76-6662	TRUE	TCGA-76-6662-01A-11D-1845-08	3.49217e-05	3.63768e-07	6.50034e-06	9.69603e-08	4.55716e-05
DO11687_TCGA-28-1753-01A-01D-1494-08	brain	ICGC_WXS_GBM_US_TCGA	FALSE	PROF					0.128775	FALSE	DO11687	0	TCGA-28-1753	TRUE	TCGA-28-1753-01A-01D-1494-08	7.09697e-05	7.39268e-07	1.38294e-05	1.70131e-07	6.57575e-05
DO11699_TCGA-14-1395-01B-11D-1845-08	brain	ICGC_WXS_GBM_US_TCGA	FALSE	PROF					0.127498	FALSE	DO11699	0	TCGA-14-1395	TRUE	TCGA-14-1395-01B-11D-1845-08	5.96994e-05	6.21869e-07	1.30601e-05	8.10765e-08	5.83519e-05
DO11705_TCGA-41-4097-01A-01D-1353-08	brain	ICGC_WXS_GBM_US_TCGA	FALSE	PROF					0.203099	FALSE	DO11705	0	TCGA-41-4097	TRUE	TCGA-41-4097-01A-01D-1353-08	4.89842e-05	5.10253e-07	5.1182e-06	3.09907e-07	5.1215e-05
DO11711_TCGA-06-5413-01A-01D-1696-08	brain	ICGC_WXS_GBM_US_TCGA	FALSE	PROF					0.122956	FALSE	DO11711	0	TCGA-06-5413	TRUE	TCGA-06-5413-01A-01D-1696-08	5.16038e-05	5.37539e-07	8.83343e-06	1.76848e-07	5.23991e-05
DO11735_TCGA-12-3644-01A-01W-0922-08	brain	ICGC_WXS_GBM_US_TCGA	FALSE	PROF					0.0356794	FALSE	DO11735	0	TCGA-12-3644	TRUE	TCGA-12-3644-01A-01W-0922-08	0.000116922	1.21793e-06	1.36981e-05	6.75316e-07	0.000111679
DO11746_TCGA-12-5301-01A-01D-1486-08	brain	ICGC_WXS_GBM_US_TCGA	FALSE	PROF					0.113974	FALSE	DO11746	0	TCGA-12-5301	TRUE	TCGA-12-5301-01A-01D-1486-08	8.66479e-05	9.02582e-07	1.64565e-05	2.26326e-07	8.41042e-05
DO11764_TCGA-06-0879-01A-01D-1492-08	brain	ICGC_WXS_GBM_US_TCGA	FALSE	PROF					0.0789759	FALSE	DO11764	0	TCGA-06-0879	TRUE	TCGA-06-0879-01A-01D-1492-08	5.2963e-05	5.51697e-07	9.20582e-06	1.75431e-07	6.24788e-05
DO11782_TCGA-27-2528-01A-01D-1494-08	brain	ICGC_WXS_GBM_US_TCGA	FALSE	PROF					0.0976817	FALSE	DO11782	0	TCGA-27-2528	TRUE	TCGA-27-2528-01A-01D-1494-08	5.0372e-05	5.24708e-07	8.55376e-06	1.75619e-07	5.39274e-05
DO11794_TCGA-06-0211-01B-01D-1491-08	brain	ICGC_WXS_GBM_US_TCGA	FALSE	PROF					0.16735	FALSE	DO11794	0	TCGA-06-0211	TRUE	TCGA-06-0211-01B-01D-1491-08	6.73477e-05	7.01539e-07	1.08417e-05	2.60662e-07	6.70512e-05
DO11794_TCGA-06-0211-02A-02D-2280-08	brain	ICGC_WXS_GBM_US_TCGA	FALSE	PROF					0.16735	FALSE	DO11794	0	TCGA-06-0211	TRUE	TCGA-06-0211-02A-02D-2280-08	6.14996e-05	6.40621e-07	1.1204e-05	1.81344e-07	6.16401e-05
DO11800_TCGA-16-1045-01B-01D-1492-08	brain	ICGC_WXS_GBM_US_TCGA	FALSE	PROF					0.0885745	FALSE	DO11800	0	TCGA-16-1045	TRUE	TCGA-16-1045-01B-01D-1492-08	8.87877e-05	9.24872e-07	1.49172e-05	3.16508e-07	8.41814e-05
DO11806_TCGA-06-0747-01A-01D-1492-08	brain	ICGC_WXS_GBM_US_TCGA	FALSE	PROF						FALSE	DO11806	0	TCGA-06-0747	TRUE	TCGA-06-0747-01A-01D-1492-08	5.74485e-05	5.98421e-07	8.33292e-06	2.62139e-07	6.79954e-05
DO11830_TCGA-06-0875-01A-01D-1492-08	brain	ICGC_WXS_GBM_US_TCGA	FALSE	PROF					0.0479083	FALSE	DO11830	0	TCGA-06-0875	TRUE	TCGA-06-0875-01A-01D-1492-08	6.77115e-05	7.05328e-07	1.11831e-05	2.49771e-07	7.20138e-05
DO11836_TCGA-06-0213-01A-01D-1491-08	brain	ICGC_WXS_GBM_US_TCGA	FALSE	PROF						FALSE	DO11836	0	TCGA-06-0213	TRUE	TCGA-06-0213-01A-01D-1491-08	5.07944e-05	5.29108e-07	6.10144e-06	2.86833e-07	5.34157e-05
DO11842_TCGA-32-1979-01A-01D-1696-08	brain	ICGC_WXS_GBM_US_TCGA	FALSE	PROF					0.154	FALSE	DO11842	0	TCGA-32-1979	TRUE	TCGA-32-1979-01A-01D-1696-08	0.000102978	1.07268e-06	2.06405e-05	2.21908e-07	9.61452e-05
DO11848_TCGA-12-5295-01A-01D-1486-08	brain	ICGC_WXS_GBM_US_TCGA	FALSE	PROF					0.129852	FALSE	DO11848	0	TCGA-12-5295	TRUE	TCGA-12-5295-01A-01D-1486-08	6.48497e-05	6.75518e-07	8.21109e-06	3.47884e-07	6.66723e-05
DO11860_TCGA-06-0744-01A-01D-1492-08	brain	ICGC_WXS_GBM_US_TCGA	FALSE	PROF						FALSE	DO11860	0	TCGA-06-0744	TRUE	TCGA-06-0744-01A-01D-1492-08	6.42578e-05	6.69353e-07	1.09883e-05	2.20702e-07	7.03543e-05
DO11866_TCGA-02-2486-01A-01D-1494-08	brain	ICGC_WXS_GBM_US_TCGA	FALSE	PROF					0.102413	FALSE	DO11866	0	TCGA-02-2486	TRUE	TCGA-02-2486-01A-01D-1494-08	7.03672e-05	7.32992e-07	1.44203e-05	1.37891e-07	7.04041e-05
DO11878_TCGA-14-0866-01B-01W-0643-08	brain	ICGC_WXS_GBM_US_TCGA	FALSE	PROF					0.0616705	FALSE	DO11878	0	TCGA-14-0866	TRUE	TCGA-14-0866-01B-01W-0643-08	0.000340001	3.54167e-06	2.40716e-05	2.64907e-06	0.000339952
DO11884_TCGA-28-5204-01A-01D-1486-08	brain	ICGC_WXS_GBM_US_TCGA	FALSE	PROF					0.123074	FALSE	DO11884	0	TCGA-28-5204	TRUE	TCGA-28-5204-01A-01D-1486-08	4.40133e-05	4.58471e-07	6.43006e-06	1.98837e-07	4.56964e-05
DO11890_TCGA-76-6280-01A-21D-1845-08	brain	ICGC_WXS_GBM_US_TCGA	FALSE	PROF					0.1562	FALSE	DO11890	0	TCGA-76-6280	TRUE	TCGA-76-6280-01A-21D-1845-08	6.45282e-05	6.72169e-07	1.23771e-05	1.63257e-07	6.82104e-05
DO11902_TCGA-06-2561-01A-02D-1494-08	brain	ICGC_WXS_GBM_US_TCGA	FALSE	PROF					0.0873943	FALSE	DO11902	0	TCGA-06-2561	TRUE	TCGA-06-2561-01A-02D-1494-08	3.34805e-05	3.48755e-07	5.78294e-06	1.12487e-07	3.36894e-05
DO11908_TCGA-32-2495-01A-01D-1353-08	brain	ICGC_WXS_GBM_US_TCGA	FALSE	PROF					0.094153	FALSE	DO11908	0	TCGA-32-2495	TRUE	TCGA-32-2495-01A-01D-1353-08	7.02111e-05	7.31365e-07	9.61186e-06	3.45257e-07	7.19624e-05
DO11914_TCGA-19-5950-01A-11D-1696-08	brain	ICGC_WXS_GBM_US_TCGA	FALSE	PROF					0.130079	FALSE	DO11914	0	TCGA-19-5950	TRUE	TCGA-19-5950-01A-11D-1696-08	7.63972e-05	7.95804e-07	1.44312e-05	2.02963e-07	7.31252e-05
DO11956_TCGA-19-1786-01A-01W-0643-08	brain	ICGC_WXS_GBM_US_TCGA	FALSE	PROF					0.101643	FALSE	DO11956	0	TCGA-19-1786	TRUE	TCGA-19-1786-01A-01W-0643-08	7.16795e-05	7.46661e-07	1.24653e-05	2.37156e-07	7.27727e-05
DO11962_TCGA-76-6285-01A-11D-1696-08	brain	ICGC_WXS_GBM_US_TCGA	FALSE	PROF					0.102522	FALSE	DO11962	0	TCGA-76-6285	TRUE	TCGA-76-6285-01A-11D-1696-08	7.09273e-05	7.38826e-07	1.35828e-05	1.80392e-07	6.98409e-05
DO11968_TCGA-06-6693-01A-11D-1845-08	brain	ICGC_WXS_GBM_US_TCGA	FALSE	PROF					0.125959	FALSE	DO11968	0	TCGA-06-6693	TRUE	TCGA-06-6693-01A-11D-1845-08	4.95765e-05	5.16422e-07	8.15843e-06	1.84161e-07	5.18699e-05
DO11986_TCGA-06-1801-01A-02W-0643-08	brain	ICGC_WXS_GBM_US_TCGA	FALSE	PROF					0.0657182	FALSE	DO11986	0	TCGA-06-1801	TRUE	TCGA-06-1801-01A-02W-0643-08	0.000228282	2.37794e-06	1.27139e-05	1.92855e-06	0.000215337
DO11992_TCGA-12-1092-01B-01W-0611-08	brain	ICGC_WXS_GBM_US_TCGA	FALSE	PROF					0.065586	FALSE	DO11992	0	TCGA-12-1092	TRUE	TCGA-12-1092-01B-01W-0611-08	5.12953e-05	5.34326e-07	7.65967e-06	2.24529e-07	5.14803e-05
DO11998_TCGA-32-2494-01A-01D-1353-08	brain	ICGC_WXS_GBM_US_TCGA	FALSE	PROF					0.138304	FALSE	DO11998	0	TCGA-32-2494	TRUE	TCGA-32-2494-01A-01D-1353-08	6.40642e-05	6.67336e-07	8.03045e-06	3.472e-07	6.03296e-05
DO12010_TCGA-27-1837-01A-01D-1494-08	brain	ICGC_WXS_GBM_US_TCGA	FALSE	PROF					0.0533759	FALSE	DO12010	0	TCGA-27-1837	TRUE	TCGA-27-1837-01A-01D-1494-08	4.0709e-05	4.24052e-07	6.7133e-06	1.50607e-07	4.47885e-05
DO12022_TCGA-28-5208-01A-01D-1486-08	brain	ICGC_WXS_GBM_US_TCGA	FALSE	PROF					0.111448	FALSE	DO12022	0	TCGA-28-5208	TRUE	TCGA-28-5208-01A-01D-1486-08	8.05927e-05	8.39508e-07	1.74417e-05	1.17674e-07	8.00823e-05
DO12028_TCGA-19-4068-01A-01D-1353-08	brain	ICGC_WXS_GBM_US_TCGA	FALSE	PROF					0.167935	FALSE	DO12028	0	TCGA-19-4068	TRUE	TCGA-19-4068-01A-01D-1353-08	7.33588e-05	7.64154e-07	1.26802e-05	2.46065e-07	7.59457e-05
DO12034_TCGA-06-0745-01A-01D-1492-08	brain	ICGC_WXS_GBM_US_TCGA	FALSE	PROF						FALSE	DO12034	0	TCGA-06-0745	TRUE	TCGA-06-0745-01A-01D-1492-08	4.83585e-05	5.03734e-07	5.67456e-06	2.78916e-07	4.686e-05
DO12046_TCGA-14-1827-01A-01W-0643-08	brain	ICGC_WXS_GBM_US_TCGA	FALSE	PROF					0.0807604	FALSE	DO12046	0	TCGA-14-1827	TRUE	TCGA-14-1827-01A-01W-0643-08	5.28416e-05	5.50434e-07	8.0572e-06	2.24053e-07	5.74555e-05
DO12052_TCGA-06-0130-01A-01D-1490-08	brain	ICGC_WXS_GBM_US_TCGA	FALSE	PROF					0.211002	FALSE	DO12052	0	TCGA-06-0130	TRUE	TCGA-06-0130-01A-01D-1490-08	2.70996e-05	2.82288e-07	3.96541e-06	1.22152e-07	2.94103e-05
DO12058_TCGA-14-0740-01B-01D-1845-08	brain	ICGC_WXS_GBM_US_TCGA	FALSE	PROF					0.111475	FALSE	DO12058	0	TCGA-14-0740	TRUE	TCGA-14-0740-01B-01D-1845-08	4.40601e-05	4.58959e-07	5.09897e-06	2.57219e-07	4.33253e-05
DO12064_TCGA-16-0861-01A-01D-1492-08	brain	ICGC_WXS_GBM_US_TCGA	FALSE	PROF					0.0413794	FALSE	DO12064	0	TCGA-16-0861	TRUE	TCGA-16-0861-01A-01D-1492-08	6.0511e-05	6.30323e-07	8.75142e-06	2.77232e-07	5.4928e-05
DO12070_TCGA-14-1823-01A-01D-1494-08	brain	ICGC_WXS_GBM_US_TCGA	FALSE	PROF					0.198113	FALSE	DO12070	0	TCGA-14-1823	TRUE	TCGA-14-1823-01A-01D-1494-08	6.43315e-05	6.70119e-07	1.07124e-05	2.335e-07	6.10763e-05
DO12076_TCGA-32-1977-01A-01D-1353-08	brain	ICGC_WXS_GBM_US_TCGA	FALSE	PROF					0.209727	FALSE	DO12076	0	TCGA-32-1977	TRUE	TCGA-32-1977-01A-01D-1353-08	8.02793e-05	8.36243e-07	1.25715e-05	3.26016e-07	8.34952e-05
DO12100_TCGA-06-1802-01A-01W-0643-08	brain	ICGC_WXS_GBM_US_TCGA	FALSE	PROF					0.0587037	FALSE	DO12100	0	TCGA-06-1802	TRUE	TCGA-06-1802-01A-01W-0643-08	0.000398942	4.15565e-06	1.61311e-05	3.63498e-06	0.000403987
DO12112_TCGA-06-0187-01A-01D-1491-08	brain	ICGC_WXS_GBM_US_TCGA	FALSE	PROF						FALSE	DO12112	0	TCGA-06-0187	TRUE	TCGA-06-0187-01A-01D-1491-08	3.94979e-05	4.11436e-07	5.81403e-06	1.76541e-07	4.1849e-05
DO12118_TCGA-76-4932-01A-01D-1486-08	brain	ICGC_WXS_GBM_US_TCGA	FALSE	PROF					0.11898	FALSE	DO12118	0	TCGA-76-4932	TRUE	TCGA-76-4932-01A-01D-1486-08	7.23168e-05	7.533e-07	1.49264e-05	1.3708e-07	7.53743e-05
DO12124_TCGA-76-4925-01A-01D-1486-08	brain	ICGC_WXS_GBM_US_TCGA	FALSE	PROF					0.135955	FALSE	DO12124	0	TCGA-76-4925	TRUE	TCGA-76-4925-01A-01D-1486-08	6.04436e-05	6.29621e-07	8.22121e-06	2.99551e-07	5.79226e-05
DO12130_TCGA-06-0939-01A-01D-1353-08	brain	ICGC_WXS_GBM_US_TCGA	FALSE	PROF					0.115438	FALSE	DO12130	0	TCGA-06-0939	TRUE	TCGA-06-0939-01A-01D-1353-08	0.000105607	1.10007e-06	1.96894e-05	2.91839e-07	9.60198e-05
DO12142_TCGA-32-1976-01A-01W-0837-08	brain	ICGC_WXS_GBM_US_TCGA	FALSE	PROF					0.031839	FALSE	DO12142	0	TCGA-32-1976	TRUE	TCGA-32-1976-01A-01W-0837-08	6.45271e-05	6.72158e-07	1.16496e-05	1.94876e-07	7.33823e-05
DO12154_TCGA-27-1838-01A-01D-1494-08	brain	ICGC_WXS_GBM_US_TCGA	FALSE	PROF					0.0606286	FALSE	DO12154	0	TCGA-27-1838	TRUE	TCGA-27-1838-01A-01D-1494-08	9.72313e-05	1.01283e-06	1.2967e-05	4.93079e-07	9.4791e-05
DO12160_TCGA-16-0850-01A-01W-0424-08	brain	ICGC_WXS_GBM_US_TCGA	FALSE						0.286584	FALSE	DO12160	0	TCGA-16-0850	TRUE	TCGA-16-0850-01A-01W-0424-08	5.01097e-05	5.21976e-07	6.80084e-06	2.48982e-07	5.29295e-05
DO12166_TCGA-28-1757-01A-02W-0643-08	brain	ICGC_WXS_GBM_US_TCGA	FALSE	PROF					0.177734	FALSE	DO12166	0	TCGA-28-1757	TRUE	TCGA-28-1757-01A-02W-0643-08	0.000166706	1.73652e-06	1.12931e-05	1.32101e-06	0.000162408
DO12172_TCGA-12-3650-01A-01D-1495-08	brain	ICGC_WXS_GBM_US_TCGA	FALSE	PROF					0.100974	FALSE	DO12172	0	TCGA-12-3650	TRUE	TCGA-12-3650-01A-01D-1495-08	6.74066e-05	7.02152e-07	1.37771e-05	1.33674e-07	6.46106e-05
DO12184_TCGA-12-3646-01A-01W-0922-08	brain	ICGC_WXS_GBM_US_TCGA	FALSE	PROF					0.0323411	FALSE	DO12184	0	TCGA-12-3646	TRUE	TCGA-12-3646-01A-01W-0922-08	7.22502e-05	7.52607e-07	8.51356e-06	4.15174e-07	7.44092e-05
DO12196_TCGA-16-0848-01A-01D-1492-08	brain	ICGC_WXS_GBM_US_TCGA	FALSE					MSH6	0.0547962	FALSE	DO12196	0	TCGA-16-0848	TRUE	TCGA-16-0848-01A-01D-1492-08	0.000581849	6.06093e-06	0.0001359	4.15747e-07	0.000578016
DO12202_TCGA-06-2569-01A-01D-1494-08	brain	ICGC_WXS_GBM_US_TCGA	FALSE						0.303712	FALSE	DO12202	0	TCGA-06-2569	TRUE	TCGA-06-2569-01A-01D-1494-08	2.60131e-05	2.7097e-07	2.81977e-06	1.60152e-07	2.60274e-05
DO12208_TCGA-19-5955-01A-11D-1696-08	brain	ICGC_WXS_GBM_US_TCGA	FALSE	PROF					0.12098	FALSE	DO12208	0	TCGA-19-5955	TRUE	TCGA-19-5955-01A-11D-1696-08	7.57079e-05	7.88624e-07	1.30262e-05	2.56554e-07	7.79181e-05
DO12214_TCGA-06-0124-01A-01D-1490-08	brain	ICGC_WXS_GBM_US_TCGA	FALSE	PROF					0.159833	FALSE	DO12214	0	TCGA-06-0124	TRUE	TCGA-06-0124-01A-01D-1490-08	5.53212e-05	5.76262e-07	9.21356e-06	2.00728e-07	6.71406e-05
DO12220_TCGA-06-0174-01A-01D-1491-08	brain	ICGC_WXS_GBM_US_TCGA	FALSE	PROF						FALSE	DO12220	0	TCGA-06-0174	TRUE	TCGA-06-0174-01A-01D-1491-08	7.91049e-05	8.2401e-07	1.36648e-05	2.65714e-07	8.00679e-05
DO12226_TCGA-12-0670-01B-01W-0424-08	brain	ICGC_WXS_GBM_US_TCGA	FALSE	PROF					0.100848	FALSE	DO12226	0	TCGA-12-0670	TRUE	TCGA-12-0670-01B-01W-0424-08	6.9082e-05	7.19604e-07	1.15641e-05	2.48106e-07	7.10421e-05
DO12250_TCGA-32-2632-01A-01D-1495-08	brain	ICGC_WXS_GBM_US_TCGA	FALSE	PROF					0.0869851	FALSE	DO12250	0	TCGA-32-2632	TRUE	TCGA-32-2632-01A-01D-1495-08	0.000104101	1.08439e-06	1.74205e-05	3.74124e-07	0.00011008
DO12256_TCGA-14-0812-01B-01W-0643-08	brain	ICGC_WXS_GBM_US_TCGA	FALSE	PROF					0.0804884	FALSE	DO12256	0	TCGA-14-0812	TRUE	TCGA-14-0812-01B-01W-0643-08	6.53383e-05	6.80607e-07	7.36434e-06	3.9001e-07	6.45097e-05
DO12268_TCGA-12-0828-01A-01W-0424-08	brain	ICGC_WXS_GBM_US_TCGA	FALSE	PROF					0.077807	FALSE	DO12268	0	TCGA-12-0828	TRUE	TCGA-12-0828-01A-01W-0424-08	8.43374e-05	8.78514e-07	9.08718e-06	5.21616e-07	8.58797e-05
DO12274_TCGA-06-5418-01A-01D-1486-08	brain	ICGC_WXS_GBM_US_TCGA	FALSE	PROF					0.12604	FALSE	DO12274	0	TCGA-06-5418	TRUE	TCGA-06-5418-01A-01D-1486-08	5.96609e-05	6.21467e-07	1.20664e-05	1.23862e-07	6.13994e-05
DO12286_TCGA-76-4934-01A-01D-1486-08	brain	ICGC_WXS_GBM_US_TCGA	FALSE	PROF					0.123369	FALSE	DO12286	0	TCGA-76-4934	TRUE	TCGA-76-4934-01A-01D-1486-08	4.34798e-05	4.52915e-07	7.00404e-06	1.68084e-07	5.77384e-05
DO12292_TCGA-06-0154-01A-03D-1491-08	brain	ICGC_WXS_GBM_US_TCGA	FALSE	PROF						FALSE	DO12292	0	TCGA-06-0154	TRUE	TCGA-06-0154-01A-03D-1491-08	6.48288e-05	6.753e-07	1.3343e-05	1.24531e-07	6.60995e-05
DO12298_TCGA-27-2527-01A-01D-1494-08	brain	ICGC_WXS_GBM_US_TCGA	FALSE	PROF					0.182641	FALSE	DO12298	0	TCGA-27-2527	TRUE	TCGA-27-2527-01A-01D-1494-08	5.34178e-05	5.56435e-07	7.38e-06	2.59759e-07	5.78693e-05
DO12304_TCGA-06-1804-01A-01D-1696-08	brain	ICGC_WXS_GBM_US_TCGA	FALSE	PROF					0.105637	FALSE	DO12304	0	TCGA-06-1804	TRUE	TCGA-06-1804-01A-01D-1696-08	8.97948e-05	9.35363e-07	1.44227e-05	3.48959e-07	9.0212e-05
DO12310_TCGA-76-4931-01A-01D-1486-08	brain	ICGC_WXS_GBM_US_TCGA	FALSE	PROF					0.166801	FALSE	DO12310	0	TCGA-76-4931	TRUE	TCGA-76-4931-01A-01D-1486-08	5.43871e-05	5.66532e-07	9.54551e-06	1.76142e-07	5.85331e-05
DO12328_TCGA-19-1790-01B-01D-1353-08	brain	ICGC_WXS_GBM_US_TCGA	FALSE	PROF					0.147578	FALSE	DO12328	0	TCGA-19-1790	TRUE	TCGA-19-1790-01B-01D-1353-08	0.000100163	1.04336e-06	1.05722e-05	6.29066e-07	0.000107663
DO12334_TCGA-06-0128-01A-01D-1490-08	brain	ICGC_WXS_GBM_US_TCGA	FALSE	PROF					0.113926	FALSE	DO12334	0	TCGA-06-0128	TRUE	TCGA-06-0128-01A-01D-1490-08	4.73945e-05	4.93692e-07	5.10909e-06	2.93023e-07	4.89394e-05
DO12346_TCGA-12-1089-01A-01W-0611-08	brain	ICGC_WXS_GBM_US_TCGA	FALSE	PROF					0.123291	FALSE	DO12346	0	TCGA-12-1089	TRUE	TCGA-12-1089-01A-01W-0611-08	0.000102412	1.06679e-06	5.96298e-06	8.53915e-07	0.000106541
DO12352_TCGA-02-2483-01A-01D-1494-08	brain	ICGC_WXS_GBM_US_TCGA	FALSE	PROF					0.0613743	FALSE	DO12352	0	TCGA-02-2483	TRUE	TCGA-02-2483-01A-01D-1494-08	4.22553e-05	4.4016e-07	3.87984e-06	2.90608e-07	4.6917e-05
DO12358_TCGA-26-5139-01A-01D-1486-08	brain	ICGC_WXS_GBM_US_TCGA	FALSE	PROF					0.121092	FALSE	DO12358	0	TCGA-26-5139	TRUE	TCGA-26-5139-01A-01D-1486-08	5.99487e-05	6.24466e-07	1.04376e-05	1.97806e-07	6.382e-05
DO12364_TCGA-06-0743-01A-01D-1492-08	brain	ICGC_WXS_GBM_US_TCGA	FALSE	PROF						FALSE	DO12364	0	TCGA-06-0743	TRUE	TCGA-06-0743-01A-01D-1492-08	9.08113e-05	9.45951e-07	1.53288e-05	3.20609e-07	0.000105428
DO12370_TCGA-19-5960-01A-11D-1696-08	brain	ICGC_WXS_GBM_US_TCGA	FALSE	PROF					0.126984	FALSE	DO12370	0	TCGA-19-5960	TRUE	TCGA-19-5960-01A-11D-1696-08	4.72993e-05	4.92702e-07	8.32616e-06	1.52117e-07	4.04714e-05
DO12376_TCGA-26-5134-01A-01D-1486-08	brain	ICGC_WXS_GBM_US_TCGA	FALSE	PROF					0.11036	FALSE	DO12376	0	TCGA-26-5134	TRUE	TCGA-26-5134-01A-01D-1486-08	3.76666e-05	3.92361e-07	3.15035e-06	2.72448e-07	4.43208e-05
DO12382_TCGA-19-1389-01A-01W-0643-08	brain	ICGC_WXS_GBM_US_TCGA	FALSE	PROF					0.173808	FALSE	DO12382	0	TCGA-19-1389	TRUE	TCGA-19-1389-01A-01W-0643-08	0.000212377	2.21226e-06	9.87276e-06	1.8792e-06	0.000207922
DO12388_TCGA-28-1752-01A-01W-0643-08	brain	ICGC_WXS_GBM_US_TCGA	FALSE	PROF					0.100864	FALSE	DO12388	0	TCGA-28-1752	TRUE	TCGA-28-1752-01A-01W-0643-08	8.13941e-05	8.47855e-07	1.13369e-05	3.91809e-07	8.43501e-05
DO12394_TCGA-12-1600-01A-01W-0643-08	brain	ICGC_WXS_GBM_US_TCGA	FALSE	PROF					0.241174	FALSE	DO12394	0	TCGA-12-1600	TRUE	TCGA-12-1600-01A-01W-0643-08	8.9098e-05	9.28104e-07	1.69498e-05	2.31507e-07	8.32474e-05
DO12418_TCGA-14-0790-01B-01D-1494-08	brain	ICGC_WXS_GBM_US_TCGA	FALSE	PROF					0.085972	FALSE	DO12418	0	TCGA-14-0790	TRUE	TCGA-14-0790-01B-01D-1494-08	7.48633e-05	7.79826e-07	1.44436e-05	1.85748e-07	7.99815e-05
DO12424_TCGA-12-1597-01B-01D-1495-08	brain	ICGC_WXS_GBM_US_TCGA	FALSE	PROF					0.047392	FALSE	DO12424	0	TCGA-12-1597	TRUE	TCGA-12-1597-01B-01D-1495-08	8.36202e-05	8.71044e-07	1.4246e-05	2.89526e-07	8.35878e-05
DO12430_TCGA-14-0862-01B-01D-1845-08	brain	ICGC_WXS_GBM_US_TCGA	FALSE	PROF					0.144672	FALSE	DO12430	0	TCGA-14-0862	TRUE	TCGA-14-0862-01B-01D-1845-08	3.67758e-05	3.83081e-07	5.5187e-06	1.59793e-07	3.60463e-05
DO12442_TCGA-06-0750-01A-01D-1492-08	brain	ICGC_WXS_GBM_US_TCGA	FALSE	PROF						FALSE	DO12442	0	TCGA-06-0750	TRUE	TCGA-06-0750-01A-01D-1492-08	4.73084e-05	4.92795e-07	8.0974e-06	1.6216e-07	4.41815e-05
DO12454_TCGA-06-5415-01A-01D-1486-08	brain	ICGC_WXS_GBM_US_TCGA	FALSE	PROF					0.126333	FALSE	DO12454	0	TCGA-06-5415	TRUE	TCGA-06-5415-01A-01D-1486-08	6.01033e-05	6.26076e-07	1.24303e-05	1.1285e-07	6.69858e-05
DO12460_TCGA-06-0241-01A-02D-1491-08	brain	ICGC_WXS_GBM_US_TCGA	FALSE	PROF						FALSE	DO12460	0	TCGA-06-0241	TRUE	TCGA-06-0241-01A-02D-1491-08	6.27425e-05	6.53568e-07	9.15907e-06	2.83764e-07	6.06978e-05
DO12466_TCGA-06-5859-01A-01D-1696-08	brain	ICGC_WXS_GBM_US_TCGA	FALSE	PROF					0.130821	FALSE	DO12466	0	TCGA-06-5859	TRUE	TCGA-06-5859-01A-01D-1696-08	4.67343e-05	4.86816e-07	8.75005e-06	1.27545e-07	5.21449e-05
DO12478_TCGA-76-4926-01B-01D-1486-08	brain	ICGC_WXS_GBM_US_TCGA	FALSE	PROF					0.114192	FALSE	DO12478	0	TCGA-76-4926	TRUE	TCGA-76-4926-01B-01D-1486-08	6.96695e-05	7.25724e-07	1.27289e-05	2.03846e-07	6.38287e-05
DO12484_TCGA-06-5411-01A-01D-1696-08	brain	ICGC_WXS_GBM_US_TCGA	FALSE	PROF					0.108896	FALSE	DO12484	0	TCGA-06-5411	TRUE	TCGA-06-5411-01A-01D-1696-08	3.2252e-05	3.35958e-07	4.83496e-06	1.4035e-07	3.23528e-05
DO12490_TCGA-15-1446-01A-01W-0611-08	brain	ICGC_WXS_GBM_US_TCGA	FALSE	PROF					0.118964	FALSE	DO12490	0	TCGA-15-1446	TRUE	TCGA-15-1446-01A-01W-0611-08	0.000154878	1.61331e-06	1.05741e-05	1.22371e-06	0.000151339
DO12496_TCGA-06-0184-01A-01D-1491-08	brain	ICGC_WXS_GBM_US_TCGA	FALSE	PROF						FALSE	DO12496	0	TCGA-06-0184	TRUE	TCGA-06-0184-01A-01D-1491-08	5.66289e-05	5.89885e-07	9.64712e-06	1.96092e-07	5.97735e-05
DO12514_TCGA-06-0122-01A-01D-1490-08	brain	ICGC_WXS_GBM_US_TCGA	FALSE	PROF					0.0806462	FALSE	DO12514	0	TCGA-06-0122	TRUE	TCGA-06-0122-01A-01D-1490-08	9.38354e-05	9.77452e-07	1.57428e-05	3.35481e-07	8.77966e-05
DO12520_TCGA-06-0209-01A-01D-1491-08	brain	ICGC_WXS_GBM_US_TCGA	FALSE	PROF						FALSE	DO12520	0	TCGA-06-0209	TRUE	TCGA-06-0209-01A-01D-1491-08	9.16056e-05	9.54225e-07	1.77511e-05	2.23928e-07	8.8321e-05
DO12538_TCGA-12-0827-01A-01W-0424-08	brain	ICGC_WXS_GBM_US_TCGA	FALSE	PROF					0.0859641	FALSE	DO12538	0	TCGA-12-0827	TRUE	TCGA-12-0827-01A-01W-0424-08	3.44967e-05	3.5934e-07	2.74134e-06	2.55775e-07	3.76863e-05
DO12556_TCGA-76-4927-01A-01D-1486-08	brain	ICGC_WXS_GBM_US_TCGA	FALSE	PROF					0.150322	FALSE	DO12556	0	TCGA-76-4927	TRUE	TCGA-76-4927-01A-01D-1486-08	5.90366e-05	6.14965e-07	1.04533e-05	1.87212e-07	5.94096e-05
DO12568_TCGA-06-0644-01A-02D-1492-08	brain	ICGC_WXS_GBM_US_TCGA	FALSE	PROF						FALSE	DO12568	0	TCGA-06-0644	TRUE	TCGA-06-0644-01A-02D-1492-08	6.93837e-05	7.22747e-07	1.40095e-05	1.45063e-07	6.69592e-05
DO12574_TCGA-06-1800-01A-01W-0643-08	brain	ICGC_WXS_GBM_US_TCGA	FALSE	PROF					0.061402	FALSE	DO12574	0	TCGA-06-1800	TRUE	TCGA-06-1800-01A-01W-0643-08	7.26566e-05	7.5684e-07	9.46154e-06	3.78375e-07	7.5602e-05
DO12580_TCGA-26-5133-01A-01D-1486-08	brain	ICGC_WXS_GBM_US_TCGA	FALSE	PROF					0.112091	FALSE	DO12580	0	TCGA-26-5133	TRUE	TCGA-26-5133-01A-01D-1486-08	4.34351e-05	4.52449e-07	5.65716e-06	2.26157e-07	4.00587e-05
DO12586_TCGA-14-4157-01A-01D-1353-08	brain	ICGC_WXS_GBM_US_TCGA	FALSE	PROF					0.216176	FALSE	DO12586	0	TCGA-14-4157	TRUE	TCGA-14-4157-01A-01D-1353-08	2.941e-05	3.06354e-07	3.52114e-06	1.66581e-07	3.21353e-05
DO12592_TCGA-19-5952-01A-11D-1696-08	brain	ICGC_WXS_GBM_US_TCGA	FALSE	PROF					0.124039	FALSE	DO12592	0	TCGA-19-5952	TRUE	TCGA-19-5952-01A-11D-1696-08	5.07621e-05	5.28772e-07	9.52985e-06	1.3742e-07	5.17762e-05
DO12604_TCGA-12-3648-01A-01W-0922-08	brain	ICGC_WXS_GBM_US_TCGA	FALSE	PROF					0.166435	FALSE	DO12604	0	TCGA-12-3648	TRUE	TCGA-12-3648-01A-01W-0922-08	5.31766e-05	5.53923e-07	8.055e-06	2.27789e-07	5.35426e-05
DO12610_TCGA-06-2559-01A-01D-1494-08	brain	ICGC_WXS_GBM_US_TCGA	FALSE	PROF					0.0337608	FALSE	DO12610	0	TCGA-06-2559	TRUE	TCGA-06-2559-01A-01D-1494-08	6.42472e-05	6.69242e-07	9.87252e-06	2.691e-07	6.36231e-05
DO12628_TCGA-06-0650-01A-02D-1696-08	brain	ICGC_WXS_GBM_US_TCGA	FALSE	PROF					0.125609	FALSE	DO12628	0	TCGA-06-0650	TRUE	TCGA-06-0650-01A-02D-1696-08	4.24111e-05	4.41782e-07	8.97881e-06	7.06072e-08	4.29759e-05
DO12634_TCGA-12-0707-01A-01W-0348-08	brain	ICGC_WXS_GBM_US_TCGA	FALSE	PROF						FALSE	DO12634	0	TCGA-12-0707	TRUE	TCGA-12-0707-01A-01W-0348-08	6.61073e-05	6.88617e-07	8.49927e-06	3.49024e-07	6.59044e-05
DO12640_TCGA-14-0871-01A-01D-1492-08	brain	ICGC_WXS_GBM_US_TCGA	FALSE	PROF					0.0692306	FALSE	DO12640	0	TCGA-14-0871	TRUE	TCGA-14-0871-01A-01D-1492-08	3.95369e-05	4.11842e-07	2.28635e-06	3.30342e-07	3.9034e-05
DO12646_TCGA-41-3393-01A-01D-1353-08	brain	ICGC_WXS_GBM_US_TCGA	FALSE	PROF					0.12335	FALSE	DO12646	0	TCGA-41-3393	TRUE	TCGA-41-3393-01A-01D-1353-08	9.1078e-05	9.48729e-07	1.82284e-05	1.97439e-07	8.42287e-05
DO12658_TCGA-06-0188-01A-01D-1491-08	brain	ICGC_WXS_GBM_US_TCGA	FALSE	PROF						FALSE	DO12658	0	TCGA-06-0188	TRUE	TCGA-06-0188-01A-01D-1491-08	5.42259e-05	5.64853e-07	9.65206e-06	1.69758e-07	5.87045e-05
DO12664_TCGA-06-0237-01A-02D-1491-08	brain	ICGC_WXS_GBM_US_TCGA	FALSE	PROF						FALSE	DO12664	0	TCGA-06-0237	TRUE	TCGA-06-0237-01A-02D-1491-08	5.19976e-05	5.41642e-07	1.01316e-05	1.24688e-07	5.3343e-05
DO12670_TCGA-19-1390-01A-01D-1495-08	brain	ICGC_WXS_GBM_US_TCGA	FALSE	PROF					0.0348289	FALSE	DO12670	0	TCGA-19-1390	TRUE	TCGA-19-1390-01A-01D-1495-08	0.000104461	1.08813e-06	1.60213e-05	4.38862e-07	0.000108345
DO12676_TCGA-06-5412-01A-01D-1696-08	brain	ICGC_WXS_GBM_US_TCGA	FALSE	PROF					0.142341	FALSE	DO12676	0	TCGA-06-5412	TRUE	TCGA-06-5412-01A-01D-1696-08	5.3003e-05	5.52115e-07	8.20395e-06	2.19426e-07	5.50791e-05
DO12694_TCGA-06-0749-01A-01D-1492-08	brain	ICGC_WXS_GBM_US_TCGA	FALSE	PROF						FALSE	DO12694	0	TCGA-06-0749	TRUE	TCGA-06-0749-01A-01D-1492-08	6.00367e-05	6.25382e-07	1.2185e-05	1.22789e-07	6.18367e-05
DO12700_TCGA-27-2524-01A-01D-1494-08	brain	ICGC_WXS_GBM_US_TCGA	FALSE	PROF					0.066178	FALSE	DO12700	0	TCGA-27-2524	TRUE	TCGA-27-2524-01A-01D-1494-08	5.2193e-05	5.43677e-07	6.94461e-06	2.65375e-07	4.77806e-05
DO12712_TCGA-19-1788-01A-01W-0643-08	brain	ICGC_WXS_GBM_US_TCGA	FALSE	PROF					0.137935	FALSE	DO12712	0	TCGA-19-1788	TRUE	TCGA-19-1788-01A-01W-0643-08	0.000139881	1.45709e-06	7.06682e-06	1.21319e-06	0.000132598
DO12718_TCGA-12-0616-01A-01D-1492-08	brain	ICGC_WXS_GBM_US_TCGA	FALSE	PROF						FALSE	DO12718	0	TCGA-12-0616	TRUE	TCGA-12-0616-01A-01D-1492-08	4.66505e-05	4.85943e-07	8.70408e-06	1.28632e-07	4.93391e-05
DO12724_TCGA-41-2573-01A-01D-1495-08	brain	ICGC_WXS_GBM_US_TCGA	FALSE	PROF					0.0617818	FALSE	DO12724	0	TCGA-41-2573	TRUE	TCGA-41-2573-01A-01D-1495-08	4.3167e-05	4.49656e-07	5.82314e-06	2.16027e-07	4.34116e-05
DO12730_TCGA-06-2565-01A-01D-1494-08	brain	ICGC_WXS_GBM_US_TCGA	FALSE	PROF					0.0367272	FALSE	DO12730	0	TCGA-06-2565	TRUE	TCGA-06-2565-01A-01D-1494-08	5.69872e-05	5.93617e-07	9.7729e-06	1.94517e-07	5.59109e-05
DO12742_TCGA-02-2485-01A-01D-1494-08	brain	ICGC_WXS_GBM_US_TCGA	FALSE	PROF					0.0644393	FALSE	DO12742	0	TCGA-02-2485	TRUE	TCGA-02-2485-01A-01D-1494-08	7.7079e-05	8.02906e-07	1.52462e-05	1.74936e-07	7.21265e-05
DO12754_TCGA-32-1991-01A-01D-1353-08	brain	ICGC_WXS_GBM_US_TCGA	FALSE	PROF					0.210195	FALSE	DO12754	0	TCGA-32-1991	TRUE	TCGA-32-1991-01A-01D-1353-08	4.80164e-05	5.00171e-07	6.09072e-06	2.57103e-07	5.16906e-05
DO12766_TCGA-28-2513-01A-01D-1494-08	brain	ICGC_WXS_GBM_US_TCGA	FALSE	PROF					0.236315	FALSE	DO12766	0	TCGA-28-2513	TRUE	TCGA-28-2513-01A-01D-1494-08	7.95786e-05	8.28944e-07	1.34426e-05	2.80524e-07	7.77451e-05
DO12772_TCGA-76-4929-01A-01D-1486-08	brain	ICGC_WXS_GBM_US_TCGA	FALSE	PROF					0.111839	FALSE	DO12772	0	TCGA-76-4929	TRUE	TCGA-76-4929-01A-01D-1486-08	6.767e-05	7.04896e-07	1.0632e-05	2.73285e-07	6.55331e-05
DO12778_TCGA-74-6584-01A-11D-1845-08	brain	ICGC_WXS_GBM_US_TCGA	FALSE	PROF					0.157163	FALSE	DO12778	0	TCGA-74-6584	TRUE	TCGA-74-6584-01A-11D-1845-08	3.36329e-05	3.50343e-07	4.49723e-06	1.70043e-07	3.29708e-05
DO12790_TCGA-27-2519-01A-01D-1494-08	brain	ICGC_WXS_GBM_US_TCGA	FALSE	PROF					0.129101	FALSE	DO12790	0	TCGA-27-2519	TRUE	TCGA-27-2519-01A-01D-1494-08	4.51951e-05	4.70782e-07	8.99446e-06	1.00187e-07	4.83561e-05
DO12802_TCGA-26-1442-01A-01D-1696-08	brain	ICGC_WXS_GBM_US_TCGA	FALSE	PROF					0.122608	FALSE	DO12802	0	TCGA-26-1442	TRUE	TCGA-26-1442-01A-01D-1696-08	4.77308e-05	4.97195e-07	5.69022e-06	2.71412e-07	4.34297e-05
DO12814_TCGA-06-0157-01A-01D-1491-08	brain	ICGC_WXS_GBM_US_TCGA	FALSE	PROF						FALSE	DO12814	0	TCGA-06-0157	TRUE	TCGA-06-0157-01A-01D-1491-08	5.35774e-05	5.58098e-07	9.3407e-06	1.76246e-07	6.25418e-05
DO12820_TCGA-14-1455-01A-01W-0643-08	brain	ICGC_WXS_GBM_US_TCGA	FALSE	PROF					0.0357708	FALSE	DO12820	0	TCGA-14-1455	TRUE	TCGA-14-1455-01A-01W-0643-08	6.82444e-05	7.10879e-07	8.95784e-06	3.52316e-07	6.87958e-05
DO12826_TCGA-19-2619-01A-01D-1495-08	brain	ICGC_WXS_GBM_US_TCGA	FALSE	PROF					0.0454521	FALSE	DO12826	0	TCGA-19-2619	TRUE	TCGA-19-2619-01A-01D-1495-08	5.22946e-05	5.44735e-07	8.11641e-06	2.15532e-07	5.96088e-05
DO12832_TCGA-32-5222-01A-01D-1486-08	brain	ICGC_WXS_GBM_US_TCGA	FALSE	PROF					0.139683	FALSE	DO12832	0	TCGA-32-5222	TRUE	TCGA-32-5222-01A-01D-1486-08	7.52944e-05	7.84317e-07	1.23124e-05	2.83096e-07	8.07375e-05
DO12838_TCGA-12-0820-01A-01W-0424-08	brain	ICGC_WXS_GBM_US_TCGA	FALSE	PROF					0.0724017	FALSE	DO12838	0	TCGA-12-0820	TRUE	TCGA-12-0820-01A-01W-0424-08	7.73717e-05	8.05955e-07	7.2768e-06	5.24614e-07	7.01686e-05
DO12850_TCGA-06-6700-01A-12D-1845-08	brain	ICGC_WXS_GBM_US_TCGA	FALSE	PROF					0.138775	FALSE	DO12850	0	TCGA-06-6700	TRUE	TCGA-06-6700-01A-12D-1845-08	6.05246e-05	6.30465e-07	1.05759e-05	1.98056e-07	6.08792e-05
DO12862_TCGA-06-5408-01A-01D-1696-08	brain	ICGC_WXS_GBM_US_TCGA	FALSE	PROF					0.109072	FALSE	DO12862	0	TCGA-06-5408	TRUE	TCGA-06-5408-01A-01D-1696-08	5.66874e-05	5.90494e-07	9.75032e-06	1.92241e-07	5.84185e-05
DO12874_TCGA-41-2571-01A-01D-1495-08	brain	ICGC_WXS_GBM_US_TCGA	FALSE	PROF					0.0929898	FALSE	DO12874	0	TCGA-41-2571	TRUE	TCGA-41-2571-01A-01D-1495-08	5.25954e-05	5.47868e-07	8.14218e-06	2.17681e-07	5.28997e-05
DO12892_TCGA-12-0818-01A-01W-0424-08	brain	ICGC_WXS_GBM_US_TCGA	FALSE	PROF					0.17046	FALSE	DO12892	0	TCGA-12-0818	TRUE	TCGA-12-0818-01A-01W-0424-08	0.00011423	1.1899e-06	7.49209e-06	9.15893e-07	0.000112888
DO12898_TCGA-12-0619-01A-01D-1492-08	brain	ICGC_WXS_GBM_US_TCGA	FALSE	PROF						FALSE	DO12898	0	TCGA-12-0619	TRUE	TCGA-12-0619-01A-01D-1492-08	6.51019e-05	6.78145e-07	1.1055e-05	2.26976e-07	6.33199e-05
DO12922_TCGA-12-0821-01A-01D-1492-08	brain	ICGC_WXS_GBM_US_TCGA	FALSE	PROF					0.0315558	FALSE	DO12922	0	TCGA-12-0821	TRUE	TCGA-12-0821-01A-01D-1492-08	6.65762e-05	6.93502e-07	7.90825e-06	3.79817e-07	6.64895e-05
DO12928_TCGA-06-0219-01A-01D-1491-08	brain	ICGC_WXS_GBM_US_TCGA	FALSE	PROF						FALSE	DO12928	0	TCGA-06-0219	TRUE	TCGA-06-0219-01A-01D-1491-08	4.51572e-05	4.70388e-07	6.79727e-06	1.95306e-07	4.34605e-05
DO12934_TCGA-12-3652-01A-01D-1495-08	brain	ICGC_WXS_GBM_US_TCGA	FALSE	PROF					0.0359938	FALSE	DO12934	0	TCGA-12-3652	TRUE	TCGA-12-3652-01A-01D-1495-08	7.87714e-05	8.20535e-07	1.2934e-05	2.93865e-07	7.1464e-05
DO12946_TCGA-06-0158-01A-01D-1491-08	brain	ICGC_WXS_GBM_US_TCGA	FALSE	PROF						FALSE	DO12946	0	TCGA-06-0158	TRUE	TCGA-06-0158-01A-01D-1491-08	6.10467e-05	6.35903e-07	1.11897e-05	1.77042e-07	6.6143e-05
DO12952_TCGA-19-2620-01A-01D-1495-08	brain	ICGC_WXS_GBM_US_TCGA	FALSE	PROF					0.0875708	FALSE	DO12952	0	TCGA-19-2620	TRUE	TCGA-19-2620-01A-01D-1495-08	8.06373e-05	8.39972e-07	1.39114e-05	2.71648e-07	8.36676e-05
DO12964_TCGA-76-6192-01A-11D-1696-08	brain	ICGC_WXS_GBM_US_TCGA	FALSE	PROF					0.118805	FALSE	DO12964	0	TCGA-76-6192	TRUE	TCGA-76-6192-01A-11D-1696-08	5.25063e-05	5.46941e-07	9.34959e-06	1.64217e-07	6.08289e-05
DO12970_TCGA-32-2638-01A-01D-1495-08	brain	ICGC_WXS_GBM_US_TCGA	FALSE	PROF					0.0836414	FALSE	DO12970	0	TCGA-32-2638	TRUE	TCGA-32-2638-01A-01D-1495-08	5.78072e-05	6.02158e-07	9.44193e-06	2.1782e-07	6.2043e-05
DO12976_TCGA-27-1833-01A-01D-1494-08	brain	ICGC_WXS_GBM_US_TCGA	FALSE	PROF					0.213403	FALSE	DO12976	0	TCGA-27-1833	TRUE	TCGA-27-1833-01A-01D-1494-08	8.17999e-05	8.52082e-07	1.58303e-05	2.00854e-07	8.40647e-05
DO13024_TCGA-14-1794-01A-01W-0643-08	brain	ICGC_WXS_GBM_US_TCGA	FALSE	PROF					0.0927739	FALSE	DO13024	0	TCGA-14-1794	TRUE	TCGA-14-1794-01A-01W-0643-08	0.000166626	1.73568e-06	1.12896e-05	1.3203e-06	0.000172137
DO13042_TCGA-06-0238-01A-02D-1492-08	brain	ICGC_WXS_GBM_US_TCGA	FALSE	PROF						FALSE	DO13042	0	TCGA-06-0238	TRUE	TCGA-06-0238-01A-02D-1492-08	3.72115e-05	3.8762e-07	4.78762e-06	1.96316e-07	3.91705e-05
DO13054_TCGA-28-2499-01A-01D-1494-08	brain	ICGC_WXS_GBM_US_TCGA	FALSE	PROF					0.0867032	FALSE	DO13054	0	TCGA-28-2499	TRUE	TCGA-28-2499-01A-01D-1494-08	2.98731e-05	3.11178e-07	5.32301e-06	9.32725e-08	3.15949e-05
DO13060_TCGA-28-5213-01A-01D-1486-08	brain	ICGC_WXS_GBM_US_TCGA	FALSE	PROF					0.14268	FALSE	DO13060	0	TCGA-28-5213	TRUE	TCGA-28-5213-01A-01D-1486-08	5.21275e-05	5.42995e-07	8.30322e-06	2.05594e-07	5.32201e-05
DO13066_TCGA-06-0141-01A-01D-1490-08	brain	ICGC_WXS_GBM_US_TCGA	FALSE	PROF					0.243942	FALSE	DO13066	0	TCGA-06-0141	TRUE	TCGA-06-0141-01A-01D-1490-08	1.75292e-05	1.82596e-07	2.12531e-06	9.81304e-08	1.82019e-05
DO13078_TCGA-27-2521-01A-01D-1494-08	brain	ICGC_WXS_GBM_US_TCGA	FALSE	PROF					0.044156	FALSE	DO13078	0	TCGA-27-2521	TRUE	TCGA-27-2521-01A-01D-1494-08	5.4394e-05	5.66605e-07	5.70391e-06	3.43244e-07	5.60168e-05
DO13084_TCGA-19-5958-01A-11D-1696-08	brain	ICGC_WXS_GBM_US_TCGA	FALSE	PROF					0.123954	FALSE	DO13084	0	TCGA-19-5958	TRUE	TCGA-19-5958-01A-11D-1696-08	4.48441e-05	4.67126e-07	7.57409e-06	1.58127e-07	4.5094e-05
DO13090_TCGA-14-1825-01A-01D-1494-08	brain	ICGC_WXS_GBM_US_TCGA	FALSE	PROF					0.0292628	FALSE	DO13090	0	TCGA-14-1825	TRUE	TCGA-14-1825-01A-01D-1494-08	4.83414e-05	5.03556e-07	7.74525e-06	1.887e-07	5.90641e-05
DO13096_TCGA-28-1747-01C-01D-1494-08	brain	ICGC_WXS_GBM_US_TCGA	FALSE	PROF					0.0480216	FALSE	DO13096	0	TCGA-28-1747	TRUE	TCGA-28-1747-01C-01D-1494-08	5.33994e-05	5.56244e-07	1.03119e-05	1.32087e-07	5.34721e-05
DO13102_TCGA-06-0169-01A-01D-1490-08	brain	ICGC_WXS_GBM_US_TCGA	FALSE	PROF					0.166662	FALSE	DO13102	0	TCGA-06-0169	TRUE	TCGA-06-0169-01A-01D-1490-08	5.18644e-05	5.40254e-07	8.42245e-06	1.9755e-07	5.49758e-05
DO13108_TCGA-06-0877-01A-01D-1492-08	brain	ICGC_WXS_GBM_US_TCGA	FALSE	PROF					0.213281	FALSE	DO13108	0	TCGA-06-0877	TRUE	TCGA-06-0877-01A-01D-1492-08	6.91821e-05	7.20646e-07	1.12105e-05	2.64565e-07	7.31603e-05
DO13114_TCGA-14-1795-01A-01W-0643-08	brain	ICGC_WXS_GBM_US_TCGA	FALSE	PROF					0.13233	FALSE	DO13114	0	TCGA-14-1795	TRUE	TCGA-14-1795-01A-01W-0643-08	0.000317843	3.31087e-06	2.69451e-05	2.28329e-06	0.000322101
DO13132_TCGA-27-1831-01A-01D-1494-08	brain	ICGC_WXS_GBM_US_TCGA	FALSE	PROF					0.16805	FALSE	DO13132	0	TCGA-27-1831	TRUE	TCGA-27-1831-01A-01D-1494-08	5.73562e-05	5.9746e-07	1.01423e-05	1.82467e-07	5.79072e-05
DO13138_TCGA-27-1836-01A-01D-1494-08	brain	ICGC_WXS_GBM_US_TCGA	FALSE	PROF					0.0647199	FALSE	DO13138	0	TCGA-27-1836	TRUE	TCGA-27-1836-01A-01D-1494-08	4.12537e-05	4.29727e-07	7.55844e-06	1.19783e-07	4.17524e-05
DO13144_TCGA-32-1970-01A-01D-1494-08	brain	ICGC_WXS_GBM_US_TCGA	FALSE	PROF					0.162117	FALSE	DO13144	0	TCGA-32-1970	TRUE	TCGA-32-1970-01A-01D-1494-08	9.33661e-05	9.72563e-07	1.90704e-05	1.857e-07	9.42414e-05
DO13150_TCGA-06-0876-01A-01D-1492-08	brain	ICGC_WXS_GBM_US_TCGA	FALSE	PROF					0.168109	FALSE	DO13150	0	TCGA-06-0876	TRUE	TCGA-06-0876-01A-01D-1492-08	6.5184e-05	6.79e-07	9.90224e-06	2.7799e-07	7.17555e-05
DO13162_TCGA-12-3653-01A-01D-1495-08	brain	ICGC_WXS_GBM_US_TCGA	FALSE	PROF					0.0436395	FALSE	DO13162	0	TCGA-12-3653	TRUE	TCGA-12-3653-01A-01D-1495-08	2.6845e-05	2.79635e-07	4.56023e-06	9.35224e-08	2.78915e-05
DO13168_TCGA-02-0033-01A-01D-1490-08	brain	ICGC_WXS_GBM_US_TCGA	FALSE	PROF					0.219984	FALSE	DO13168	0	TCGA-02-0033	TRUE	TCGA-02-0033-01A-01D-1490-08	3.68066e-05	3.83402e-07	7.27877e-06	8.3604e-08	3.40186e-05
DO13174_TCGA-19-5953-01B-12D-1845-08	brain	ICGC_WXS_GBM_US_TCGA	FALSE	PROF					0.152525	FALSE	DO13174	0	TCGA-19-5953	TRUE	TCGA-19-5953-01B-12D-1845-08	6.11186e-05	6.36652e-07	1.16328e-05	1.58557e-07	6.17872e-05
DO13210_TCGA-19-1789-01A-01W-0643-08	brain	ICGC_WXS_GBM_US_TCGA	FALSE	PROF					0.0587512	FALSE	DO13210	0	TCGA-19-1789	TRUE	TCGA-19-1789-01A-01W-0643-08	6.8643e-05	7.15031e-07	9.60335e-06	3.28583e-07	7.49677e-05
DO13216_TCGA-14-3477-01A-01W-0922-08	brain	ICGC_WXS_GBM_US_TCGA	FALSE	PROF					0.0345131	FALSE	DO13216	0	TCGA-14-3477	TRUE	TCGA-14-3477-01A-01W-0922-08	3.56337e-05	3.71184e-07	2.87205e-06	2.62451e-07	3.65646e-05
DO13252_TCGA-19-5947-01A-11D-1696-08	brain	ICGC_WXS_GBM_US_TCGA	FALSE	PROF					0.129621	FALSE	DO13252	0	TCGA-19-5947	TRUE	TCGA-19-5947-01A-11D-1696-08	3.03492e-05	3.16138e-07	5.2182e-06	1.03004e-07	3.03459e-05
DO13264_TCGA-06-6701-01A-11D-1845-08	brain	ICGC_WXS_GBM_US_TCGA	FALSE	PROF					0.171856	FALSE	DO13264	0	TCGA-06-6701	TRUE	TCGA-06-6701-01A-11D-1845-08	3.71719e-05	3.87207e-07	5.18098e-06	1.78783e-07	3.76471e-05
DO13270_TCGA-14-1450-01B-01D-1845-08	brain	ICGC_WXS_GBM_US_TCGA	FALSE	PROF					0.135407	FALSE	DO13270	0	TCGA-14-1450	TRUE	TCGA-14-1450-01B-01D-1845-08	6.30695e-05	6.56974e-07	1.17515e-05	1.74606e-07	6.12751e-05
DO13282_TCGA-28-5215-01A-01D-1486-08	brain	ICGC_WXS_GBM_US_TCGA	FALSE	PROF					0.118346	FALSE	DO13282	0	TCGA-28-5215	TRUE	TCGA-28-5215-01A-01D-1486-08	4.35741e-05	4.53897e-07	7.73513e-06	1.37322e-07	4.31348e-05
DO13300_TCGA-27-1834-01A-01D-1494-08	brain	ICGC_WXS_GBM_US_TCGA	FALSE	PROF					0.0835051	FALSE	DO13300	0	TCGA-27-1834	TRUE	TCGA-27-1834-01A-01D-1494-08	6.24834e-05	6.50868e-07	9.38842e-06	2.70975e-07	5.96333e-05
DO13318_TCGA-06-2557-01A-01D-1494-08	brain	ICGC_WXS_GBM_US_TCGA	FALSE	PROF					0.0647214	FALSE	DO13318	0	TCGA-06-2557	TRUE	TCGA-06-2557-01A-01D-1494-08	4.98537e-05	5.19309e-07	7.40454e-06	2.19951e-07	5.19846e-05
DO13324_TCGA-06-2567-01A-01D-1494-08	brain	ICGC_WXS_GBM_US_TCGA	FALSE	PROF					0.123457	FALSE	DO13324	0	TCGA-06-2567	TRUE	TCGA-06-2567-01A-01D-1494-08	5.15184e-05	5.3665e-07	8.9925e-06	1.69005e-07	5.91696e-05
DO13330_TCGA-12-5299-01A-02D-1486-08	brain	ICGC_WXS_GBM_US_TCGA	FALSE	PROF					0.135904	FALSE	DO13330	0	TCGA-12-5299	TRUE	TCGA-12-5299-01A-02D-1486-08	4.45603e-05	4.6417e-07	8.84057e-06	9.99783e-08	4.66474e-05
DO13336_TCGA-32-4209-01A-01D-1353-08	brain	ICGC_WXS_GBM_US_TCGA	FALSE	PROF					0.227276	FALSE	DO13336	0	TCGA-32-4209	TRUE	TCGA-32-4209-01A-01D-1353-08	3.28334e-05	3.42015e-07	5.4997e-06	1.17768e-07	3.40922e-05
DO13348_TCGA-06-0686-01A-01D-1492-08	brain	ICGC_WXS_GBM_US_TCGA	FALSE	PROF						FALSE	DO13348	0	TCGA-06-0686	TRUE	TCGA-06-0686-01A-01D-1492-08	6.50617e-05	6.77726e-07	8.71837e-06	3.28133e-07	6.60598e-05
DO13354_TCGA-32-2491-01A-01D-1353-08	brain	ICGC_WXS_GBM_US_TCGA	FALSE	PROF					0.153331	FALSE	DO13354	0	TCGA-32-2491	TRUE	TCGA-32-2491-01A-01D-1353-08	9.82269e-05	1.0232e-06	1.63115e-05	3.58489e-07	9.74401e-05
DO13360_TCGA-16-1460-01A-01W-0643-08	brain	ICGC_WXS_GBM_US_TCGA	FALSE	PROF					0.115674	FALSE	DO13360	0	TCGA-16-1460	TRUE	TCGA-16-1460-01A-01W-0643-08	8.88057e-05	9.2506e-07	4.59846e-06	7.65347e-07	8.36993e-05
DO13366_TCGA-28-1755-01A-01W-0643-08	brain	ICGC_WXS_GBM_US_TCGA	FALSE	PROF					0.0386464	FALSE	DO13366	0	TCGA-28-1755	TRUE	TCGA-28-1755-01A-01W-0643-08	8.61453e-05	8.97347e-07	1.12145e-05	4.48777e-07	8.31108e-05
DO13372_TCGA-32-1980-01A-01D-1696-08	brain	ICGC_WXS_GBM_US_TCGA	FALSE	PROF					0.124269	FALSE	DO13372	0	TCGA-32-1980	TRUE	TCGA-32-1980-01A-01D-1696-08	2.06466e-05	2.15068e-07	3.06478e-06	9.11681e-08	1.84645e-05
DO13378_TCGA-06-2564-01A-01D-1494-08	brain	ICGC_WXS_GBM_US_TCGA	FALSE	PROF					0.0802243	FALSE	DO13378	0	TCGA-06-2564	TRUE	TCGA-06-2564-01A-01D-1494-08	6.6781e-05	6.95636e-07	1.1711e-05	2.16706e-07	7.0615e-05
DO13384_TCGA-14-1451-01A-01W-0611-08	brain	ICGC_WXS_GBM_US_TCGA	FALSE	PROF					0.0767874	FALSE	DO13384	0	TCGA-14-1451	TRUE	TCGA-14-1451-01A-01W-0611-08	4.04588e-05	4.21446e-07	6.79429e-06	1.44366e-07	3.79964e-05
DO13402_TCGA-12-3649-01A-01D-1495-08	brain	ICGC_WXS_GBM_US_TCGA	FALSE	PROF					0.0721822	FALSE	DO13402	0	TCGA-12-3649	TRUE	TCGA-12-3649-01A-01D-1495-08	8.31052e-05	8.6568e-07	1.37438e-05	3.05759e-07	8.01852e-05
DO13414_TCGA-27-1830-01A-01D-1494-08	brain	ICGC_WXS_GBM_US_TCGA	FALSE	PROF					0.116379	FALSE	DO13414	0	TCGA-27-1830	TRUE	TCGA-27-1830-01A-01D-1494-08	4.62782e-05	4.82065e-07	7.70505e-06	1.68022e-07	5.14447e-05
DO13420_TCGA-06-0192-01B-01D-1492-08	brain	ICGC_WXS_GBM_US_TCGA	FALSE	PROF						FALSE	DO13420	0	TCGA-06-0192	TRUE	TCGA-06-0192-01B-01D-1492-08	7.89491e-05	8.22387e-07	1.47199e-05	2.18145e-07	7.99463e-05
DO13426_TCGA-12-0656-01A-03W-0348-08	brain	ICGC_WXS_GBM_US_TCGA	FALSE	PROF						FALSE	DO13426	0	TCGA-12-0656	TRUE	TCGA-12-0656-01A-03W-0348-08	5.16526e-05	5.38047e-07	7.78247e-06	2.23073e-07	5.38998e-05
DO13432_TCGA-06-0139-01A-01D-1490-08	brain	ICGC_WXS_GBM_US_TCGA	FALSE						0.286297	FALSE	DO13432	0	TCGA-06-0139	TRUE	TCGA-06-0139-01A-01D-1490-08	2.33644e-06	2.43379e-08	3.30583e-07	1.10228e-08	2.31771e-06
DO13450_TCGA-06-0132-01A-02D-1491-08	brain	ICGC_WXS_GBM_US_TCGA	FALSE	PROF						FALSE	DO13450	0	TCGA-06-0132	TRUE	TCGA-06-0132-01A-02D-1491-08	2.81784e-05	2.93525e-07	4.82424e-06	9.65371e-08	2.53901e-05
DO13456_TCGA-06-5856-01A-01D-1696-08	brain	ICGC_WXS_GBM_US_TCGA	FALSE	PROF					0.129729	FALSE	DO13456	0	TCGA-06-5856	TRUE	TCGA-06-5856-01A-01D-1696-08	4.78857e-05	4.9881e-07	4.01633e-06	3.45874e-07	4.60568e-05
DO13462_TCGA-32-2616-01A-01D-1495-08	brain	ICGC_WXS_GBM_US_TCGA	FALSE	PROF					0.078599	FALSE	DO13462	0	TCGA-32-2616	TRUE	TCGA-32-2616-01A-01D-1495-08	0.00189755	1.97662e-05	0.000459175	6.61458e-07	0.00183703
DO13468_TCGA-06-0195-01B-01D-1491-08	brain	ICGC_WXS_GBM_US_TCGA	FALSE	PROF						FALSE	DO13468	0	TCGA-06-0195	TRUE	TCGA-06-0195-01B-01D-1491-08	7.05031e-05	7.34407e-07	1.06353e-05	3.03934e-07	7.30319e-05
DO13474_TCGA-26-5132-01A-01D-1486-08	brain	ICGC_WXS_GBM_US_TCGA	FALSE	PROF					0.120559	FALSE	DO13474	0	TCGA-26-5132	TRUE	TCGA-26-5132-01A-01D-1486-08	4.78072e-05	4.97992e-07	6.70812e-06	2.27986e-07	5.02569e-05
DO13480_TCGA-02-2466-01A-01W-0837-08	brain	ICGC_WXS_GBM_US_TCGA	FALSE	PROF					0.0513626	FALSE	DO13480	0	TCGA-02-2466	TRUE	TCGA-02-2466-01A-01W-0837-08	9.25489e-05	9.64051e-07	7.77039e-06	6.68124e-07	9.45922e-05
DO13492_TCGA-28-5218-01A-01D-1486-08	brain	ICGC_WXS_GBM_US_TCGA	FALSE	PROF					0.120512	FALSE	DO13492	0	TCGA-28-5218	TRUE	TCGA-28-5218-01A-01D-1486-08	1.34494e-05	1.40097e-07	8.18631e-07	1.10596e-07	1.43169e-05
DO13498_TCGA-28-6450-01A-11D-1696-08	brain	ICGC_WXS_GBM_US_TCGA	FALSE	PROF					0.123788	FALSE	DO13498	0	TCGA-28-6450	TRUE	TCGA-28-6450-01A-11D-1696-08	5.22386e-05	5.44152e-07	7.74388e-06	2.31121e-07	4.9115e-05
DO13504_TCGA-08-0386-01A-01D-1492-08	brain	ICGC_WXS_GBM_US_TCGA	FALSE	PROF						FALSE	DO13504	0	TCGA-08-0386	TRUE	TCGA-08-0386-01A-01D-1492-08	1.91584e-05	1.99567e-07	3.68217e-06	4.81491e-08	1.87171e-05
DO13510_TCGA-06-0125-01A-01D-1490-08	brain	ICGC_WXS_GBM_US_TCGA	FALSE	PROF					0.0866211	FALSE	DO13510	0	TCGA-06-0125	TRUE	TCGA-06-0125-01A-01D-1490-08	6.87535e-05	7.16182e-07	1.36383e-05	1.54351e-07	7.44909e-05
DO13510_TCGA-06-0125-02A-11D-2280-08	brain	ICGC_WXS_GBM_US_TCGA	FALSE	PROF					0.0866211	FALSE	DO13510	0	TCGA-06-0125	TRUE	TCGA-06-0125-02A-11D-2280-08	7.37711e-05	7.68449e-07	1.31503e-05	2.3011e-07	7.87132e-05
DO13516_TCGA-02-2470-01A-01D-1494-08	brain	ICGC_WXS_GBM_US_TCGA	FALSE	PROF					0.0963526	FALSE	DO13516	0	TCGA-02-2470	TRUE	TCGA-02-2470-01A-01D-1494-08	6.81572e-05	7.09971e-07	1.24528e-05	1.99412e-07	6.62662e-05
DO13522_TCGA-19-1787-01B-01D-1495-08	brain	ICGC_WXS_GBM_US_TCGA	FALSE	PROF					0.0533181	FALSE	DO13522	0	TCGA-19-1787	TRUE	TCGA-19-1787-01B-01D-1495-08	0.000930979	9.69769e-06	0.00021688	6.89765e-07	0.00095009
DO13528_TCGA-14-1453-01A-01W-0611-08	brain	ICGC_WXS_GBM_US_TCGA	FALSE	PROF					0.105459	FALSE	DO13528	0	TCGA-14-1453	TRUE	TCGA-14-1453-01A-01W-0611-08	7.15594e-05	7.45411e-07	1.091e-05	3.03471e-07	7.23804e-05
DO13534_TCGA-19-2623-01A-01D-1495-08	brain	ICGC_WXS_GBM_US_TCGA	FALSE	PROF					0.0641223	FALSE	DO13534	0	TCGA-19-2623	TRUE	TCGA-19-2623-01A-01D-1495-08	9.41898e-05	9.81144e-07	1.71915e-05	2.76347e-07	9.35335e-05
DO13540_TCGA-06-6695-01A-11D-1845-08	brain	ICGC_WXS_GBM_US_TCGA	FALSE	PROF					0.127953	FALSE	DO13540	0	TCGA-06-6695	TRUE	TCGA-06-6695-01A-11D-1845-08	6.47355e-05	6.74328e-07	1.0828e-05	2.32864e-07	6.40109e-05
DO13546_TCGA-81-5911-01A-12D-1845-08	brain	ICGC_WXS_GBM_US_TCGA	FALSE	PROF					0.164559	FALSE	DO13546	0	TCGA-81-5911	TRUE	TCGA-81-5911-01A-12D-1845-08	2.76193e-05	2.87701e-07	4.81573e-06	9.08301e-08	3.36318e-05
DO13552_TCGA-76-6286-01A-11D-1845-08	brain	ICGC_WXS_GBM_US_TCGA	FALSE	PROF					0.12085	FALSE	DO13552	0	TCGA-76-6286	TRUE	TCGA-76-6286-01A-11D-1845-08	8.20647e-05	8.5484e-07	1.55592e-05	2.15521e-07	8.18695e-05
DO13558_TCGA-06-5417-01A-01D-1486-08	brain	ICGC_WXS_GBM_US_TCGA	FALSE	PROF					0.110668	FALSE	DO13558	0	TCGA-06-5417	TRUE	TCGA-06-5417-01A-01D-1486-08	4.67874e-05	4.87369e-07	5.14274e-06	2.84961e-07	4.75661e-05
DO13564_TCGA-28-1746-01A-01W-0643-08	brain	ICGC_WXS_GBM_US_TCGA	FALSE	PROF					0.0656286	FALSE	DO13564	0	TCGA-28-1746	TRUE	TCGA-28-1746-01A-01W-0643-08	8.24325e-05	8.58672e-07	1.22464e-05	3.63553e-07	8.24727e-05
DO13569_TCGA-32-1986-01A-01D-1494-08	brain	ICGC_WXS_GBM_US_TCGA	FALSE	PROF					0.160947	FALSE	DO13569	0	TCGA-32-1986	TRUE	TCGA-32-1986-01A-01D-1494-08	5.05369e-05	5.26426e-07	9.29753e-06	1.45074e-07	5.48626e-05
DO13575_TCGA-06-2570-01A-01D-1495-08	brain	ICGC_WXS_GBM_US_TCGA	FALSE	PROF					0.0305841	FALSE	DO13575	0	TCGA-06-2570	TRUE	TCGA-06-2570-01A-01D-1495-08	3.22989e-05	3.36447e-07	4.58638e-06	1.51667e-07	3.43995e-05
DO13581_TCGA-06-2562-01A-01D-1494-08	brain	ICGC_WXS_GBM_US_TCGA	FALSE	PROF					0.055845	FALSE	DO13581	0	TCGA-06-2562	TRUE	TCGA-06-2562-01A-01D-1494-08	6.67245e-05	6.95047e-07	1.19804e-05	2.04378e-07	6.69991e-05
DO13605_TCGA-12-0819-01A-01W-0424-08	brain	ICGC_WXS_GBM_US_TCGA	FALSE	PROF					0.0549311	FALSE	DO13605	0	TCGA-12-0819	TRUE	TCGA-12-0819-01A-01W-0424-08	5.51914e-05	5.7491e-07	8.66388e-06	2.23216e-07	5.88534e-05
DO13617_TCGA-14-1456-01B-01D-1494-08	brain	ICGC_WXS_GBM_US_TCGA	FALSE	PROF					0.215437	FALSE	DO13617	0	TCGA-14-1456	TRUE	TCGA-14-1456-01B-01D-1494-08	2.01134e-05	2.09514e-07	1.97142e-06	1.3291e-07	2.3022e-05
DO13623_TCGA-15-0742-01A-01D-1492-08	brain	ICGC_WXS_GBM_US_TCGA	FALSE	PROF						FALSE	DO13623	0	TCGA-15-0742	TRUE	TCGA-15-0742-01A-01D-1492-08	8.3031e-05	8.64906e-07	1.61073e-05	2.02195e-07	8.04297e-05
DO13629_TCGA-06-5414-01A-01D-1486-08	brain	ICGC_WXS_GBM_US_TCGA	FALSE	PROF					0.127337	FALSE	DO13629	0	TCGA-06-5414	TRUE	TCGA-06-5414-01A-01D-1486-08	4.07156e-05	4.2412e-07	7.18408e-06	1.30209e-07	4.20559e-05
DO13635_TCGA-16-0846-01A-01D-1492-08	brain	ICGC_WXS_GBM_US_TCGA	FALSE	PROF					0.0606485	FALSE	DO13635	0	TCGA-16-0846	TRUE	TCGA-16-0846-01A-01D-1492-08	7.6935e-05	8.01406e-07	1.15381e-05	3.34592e-07	7.28341e-05
DO13647_TCGA-32-4211-01A-01D-1353-08	brain	ICGC_WXS_GBM_US_TCGA	FALSE						0.292511	FALSE	DO13647	0	TCGA-32-4211	TRUE	TCGA-32-4211-01A-01D-1353-08	8.22843e-05	8.57128e-07	1.43456e-05	2.70674e-07	8.5185e-05
DO13653_TCGA-14-0817-01A-01D-1492-08	brain	ICGC_WXS_GBM_US_TCGA	FALSE	PROF					0.149373	FALSE	DO13653	0	TCGA-14-0817	TRUE	TCGA-14-0817-01A-01D-1492-08	8.19901e-05	8.54063e-07	1.60577e-05	1.93035e-07	8.37179e-05
DO13671_TCGA-76-6656-01A-11D-1845-08	brain	ICGC_WXS_GBM_US_TCGA	FALSE	PROF					0.134013	FALSE	DO13671	0	TCGA-76-6656	TRUE	TCGA-76-6656-01A-11D-1845-08	0.000101401	1.05626e-06	1.73418e-05	3.48194e-07	0.000101981
DO13677_TCGA-14-0787-01A-01D-1492-08	brain	ICGC_WXS_GBM_US_TCGA	FALSE	PROF					0.217037	FALSE	DO13677	0	TCGA-14-0787	TRUE	TCGA-14-0787-01A-01D-1492-08	4.0859e-05	4.25614e-07	7.56201e-06	1.15336e-07	4.37684e-05
DO13701_TCGA-12-1088-01A-01W-0611-08	brain	ICGC_WXS_GBM_US_TCGA	FALSE	PROF					0.0786931	FALSE	DO13701	0	TCGA-12-1088	TRUE	TCGA-12-1088-01A-01W-0611-08	8.94182e-05	9.3144e-07	7.76324e-06	6.34405e-07	8.37468e-05
DO13707_TCGA-12-1599-01A-01W-0643-08	brain	ICGC_WXS_GBM_US_TCGA	FALSE	PROF					0.155636	FALSE	DO13707	0	TCGA-12-1599	TRUE	TCGA-12-1599-01A-01W-0643-08	4.19362e-05	4.36836e-07	7.56558e-06	1.2689e-07	4.58545e-05
DO13719_TCGA-27-2526-01A-01D-1494-08	brain	ICGC_WXS_GBM_US_TCGA	FALSE	PROF					0.11735	FALSE	DO13719	0	TCGA-27-2526	TRUE	TCGA-27-2526-01A-01D-1494-08	4.80268e-05	5.00279e-07	8.78115e-06	1.40241e-07	5.58686e-05
DO13725_TCGA-28-1760-01A-01W-0643-08	brain	ICGC_WXS_GBM_US_TCGA	FALSE	PROF					0.183959	FALSE	DO13725	0	TCGA-28-1760	TRUE	TCGA-28-1760-01A-01W-0643-08	0.000264512	2.75534e-06	1.22777e-05	2.34132e-06	0.000260537
DO13737_TCGA-06-6698-01A-11D-1845-08	brain	ICGC_WXS_GBM_US_TCGA	FALSE	PROF					0.154453	FALSE	DO13737	0	TCGA-06-6698	TRUE	TCGA-06-6698-01A-11D-1845-08	3.16559e-05	3.29749e-07	4.05653e-06	1.67716e-07	3.30028e-05
DO13743_TCGA-28-1751-01A-02W-0643-08	brain	ICGC_WXS_GBM_US_TCGA	FALSE	PROF					0.184432	FALSE	DO13743	0	TCGA-28-1751	TRUE	TCGA-28-1751-01A-02W-0643-08	8.1198e-05	8.45813e-07	3.52471e-06	7.29339e-07	8.44829e-05
DO13749_TCGA-06-5410-01A-01D-1696-08	brain	ICGC_WXS_GBM_US_TCGA	FALSE	PROF					0.150683	FALSE	DO13749	0	TCGA-06-5410	TRUE	TCGA-06-5410-01A-01D-1696-08	2.62876e-05	2.73829e-07	4.04938e-06	1.09674e-07	2.76207e-05
DO13761_TCGA-19-1385-01A-02W-0643-08	brain	ICGC_WXS_GBM_US_TCGA	FALSE	PROF					0.212697	FALSE	DO13761	0	TCGA-19-1385	TRUE	TCGA-19-1385-01A-02W-0643-08	0.000140277	1.46122e-06	4.70561e-06	1.32016e-06	0.000141524
DO13773_TCGA-27-2518-01A-01D-1494-08	brain	ICGC_WXS_GBM_US_TCGA	FALSE	PROF					0.0687291	FALSE	DO13773	0	TCGA-27-2518	TRUE	TCGA-27-2518-01A-01D-1494-08	5.84976e-05	6.0935e-07	1.09992e-05	1.57619e-07	6.27494e-05
DO13791_TCGA-06-0646-01A-01D-1492-08	brain	ICGC_WXS_GBM_US_TCGA	FALSE	PROF						FALSE	DO13791	0	TCGA-06-0646	TRUE	TCGA-06-0646-01A-01D-1492-08	3.19012e-05	3.32304e-07	4.33423e-06	1.58307e-07	3.16851e-05
DO13797_TCGA-19-1388-01A-01W-0643-08	brain	ICGC_WXS_GBM_US_TCGA	FALSE	PROF					0.0768522	FALSE	DO13797	0	TCGA-19-1388	TRUE	TCGA-19-1388-01A-01W-0643-08	0.000118468	1.23404e-06	9.40211e-06	8.7891e-07	0.000126424
DO13803_TCGA-26-1439-01A-01D-1353-08	brain	ICGC_WXS_GBM_US_TCGA	FALSE	PROF					0.148261	FALSE	DO13803	0	TCGA-26-1439	TRUE	TCGA-26-1439-01A-01D-1353-08	5.53575e-05	5.76641e-07	9.65206e-06	1.82057e-07	5.52293e-05
DO13809_TCGA-19-2631-01A-01D-1353-08	brain	ICGC_WXS_GBM_US_TCGA	FALSE	PROF					0.0912316	FALSE	DO13809	0	TCGA-19-2631	TRUE	TCGA-19-2631-01A-01D-1353-08	9.06899e-05	9.44686e-07	1.22183e-05	4.54529e-07	9.03833e-05
DO13821_TCGA-14-1829-01A-01D-1494-08	brain	ICGC_WXS_GBM_US_TCGA	FALSE	PROF					0.115631	FALSE	DO13821	0	TCGA-14-1829	TRUE	TCGA-14-1829-01A-01D-1494-08	6.46101e-05	6.73022e-07	1.0501e-05	2.45718e-07	6.72915e-05
DO13827_TCGA-26-6173-01A-11D-1845-08	brain	ICGC_WXS_GBM_US_TCGA	FALSE	PROF					0.132864	FALSE	DO13827	0	TCGA-26-6173	TRUE	TCGA-26-6173-01A-11D-1845-08	4.01343e-05	4.18066e-07	7.00564e-06	1.31649e-07	3.50033e-05
DO13845_TCGA-12-3651-01A-01W-0922-08	brain	ICGC_WXS_GBM_US_TCGA	FALSE	PROF					0.0555075	FALSE	DO13845	0	TCGA-12-3651	TRUE	TCGA-12-3651-01A-01W-0922-08	0.000104134	1.08473e-06	1.22238e-05	6.0042e-07	9.81747e-05
DO13851_TCGA-14-1458-01A-01W-0643-08	brain	ICGC_WXS_GBM_US_TCGA	FALSE	PROF					0.149702	FALSE	DO13851	0	TCGA-14-1458	TRUE	TCGA-14-1458-01A-01W-0643-08	0.000146098	1.52186e-06	6.60871e-06	1.30069e-06	0.000144738
DO13863_TCGA-19-5956-01A-11D-1696-08	brain	ICGC_WXS_GBM_US_TCGA	FALSE	POLEd	A456P				0.103625	FALSE	DO13863	0	TCGA-19-5956	TRUE	TCGA-19-5956-01A-11D-1696-08	0.00775812	8.08137e-05	0.00118126	3.29682e-05	0.00753897
DO13869_TCGA-06-0210-01B-01D-1491-08	brain	ICGC_WXS_GBM_US_TCGA	FALSE	PROF					0.122221	FALSE	DO13869	0	TCGA-06-0210	TRUE	TCGA-06-0210-01B-01D-1491-08	7.98253e-05	8.31513e-07	1.49473e-05	2.17782e-07	7.14665e-05
DO13869_TCGA-06-0210-02A-01D-2280-08	brain	ICGC_WXS_GBM_US_TCGA	FALSE	PROF					0.122221	FALSE	DO13869	0	TCGA-06-0210	TRUE	TCGA-06-0210-02A-01D-2280-08	8.58818e-05	8.94602e-07	1.52306e-05	2.71299e-07	8.06041e-05
DO13881_TCGA-06-0645-01A-01D-1492-08	brain	ICGC_WXS_GBM_US_TCGA	FALSE	PROF						FALSE	DO13881	0	TCGA-06-0645	TRUE	TCGA-06-0645-01A-01D-1492-08	8.5664e-05	8.92333e-07	1.59569e-05	2.3735e-07	7.71493e-05
DO13893_TCGA-06-6699-01A-11D-1845-08	brain	ICGC_WXS_GBM_US_TCGA	FALSE	PROF					0.147275	FALSE	DO13893	0	TCGA-06-6699	TRUE	TCGA-06-6699-01A-11D-1845-08	6.7634e-05	7.04521e-07	1.34642e-05	1.49753e-07	6.99868e-05
DO13899_TCGA-14-0789-01A-01D-1492-08	brain	ICGC_WXS_GBM_US_TCGA	FALSE	PROF					0.172766	FALSE	DO13899	0	TCGA-14-0789	TRUE	TCGA-14-0789-01A-01D-1492-08	7.44374e-05	7.7539e-07	1.24352e-05	2.68442e-07	7.78012e-05
DO13905_TCGA-14-0781-01B-01D-1696-08	brain	ICGC_WXS_GBM_US_TCGA	FALSE	PROF					0.142994	FALSE	DO13905	0	TCGA-14-0781	TRUE	TCGA-14-0781-01B-01D-1696-08	3.49638e-05	3.64206e-07	6.2991e-06	1.06167e-07	3.1481e-05
DO13911_TCGA-12-0657-01A-01W-0348-08	brain	ICGC_WXS_GBM_US_TCGA	FALSE	PROF						FALSE	DO13911	0	TCGA-12-0657	TRUE	TCGA-12-0657-01A-01W-0348-08	6.67714e-05	6.95535e-07	1.01754e-05	2.83368e-07	7.01257e-05
DO13917_TCGA-16-0849-01A-01W-0424-08	brain	ICGC_WXS_GBM_US_TCGA	FALSE	PROF					0.0749501	FALSE	DO13917	0	TCGA-16-0849	TRUE	TCGA-16-0849-01A-01W-0424-08	5.65791e-05	5.89366e-07	6.18184e-06	3.46215e-07	5.60019e-05
DO13929_TCGA-12-0826-01A-01W-0424-08	brain	ICGC_WXS_GBM_US_TCGA	FALSE	PROF					0.146073	FALSE	DO13929	0	TCGA-12-0826	TRUE	TCGA-12-0826-01A-01W-0424-08	7.90813e-05	8.23764e-07	1.3767e-05	2.61013e-07	8.33141e-05
DO13941_TCGA-74-6577-01A-11D-1845-08	brain	ICGC_WXS_GBM_US_TCGA	FALSE	PROF					0.133149	FALSE	DO13941	0	TCGA-74-6577	TRUE	TCGA-74-6577-01A-11D-1845-08	7.5377e-05	7.85177e-07	6.15176e-06	5.51847e-07	8.04464e-05
DO13947_TCGA-14-0813-01A-01D-1492-08	brain	ICGC_WXS_GBM_US_TCGA	FALSE	PROF					0.0802159	FALSE	DO13947	0	TCGA-14-0813	TRUE	TCGA-14-0813-01A-01D-1492-08	9.29733e-05	9.68472e-07	1.43731e-05	3.85662e-07	9.82614e-05
DO13959_TCGA-14-1821-01A-01W-0643-08	brain	ICGC_WXS_GBM_US_TCGA	FALSE	PROF					0.0283225	FALSE	DO13959	0	TCGA-14-1821	TRUE	TCGA-14-1821-01A-01W-0643-08	2.12923e-05	2.21795e-07	2.24257e-06	1.33935e-07	1.99559e-05
DO13965_TCGA-06-0881-01A-02D-1492-08	brain	ICGC_WXS_GBM_US_TCGA	FALSE	PROF					0.216291	FALSE	DO13965	0	TCGA-06-0881	TRUE	TCGA-06-0881-01A-02D-1492-08	2.43089e-05	2.53218e-07	4.56555e-06	6.57252e-08	2.50256e-05
DO13971_TCGA-06-0221-01A-01D-1491-08	brain	ICGC_WXS_GBM_US_TCGA	FALSE	PROF					0.154415	FALSE	DO13971	0	TCGA-06-0221	TRUE	TCGA-06-0221-01A-01D-1491-08	3.18237e-05	3.31497e-07	4.21399e-06	1.62693e-07	3.39597e-05
DO13971_TCGA-06-0221-02A-11D-2280-08	brain	ICGC_WXS_GBM_US_TCGA	FALSE	PROF					0.154415	FALSE	DO13971	0	TCGA-06-0221	TRUE	TCGA-06-0221-02A-11D-2280-08	3.88643e-05	4.04836e-07	4.45703e-06	2.28654e-07	3.99653e-05
DO13977_TCGA-28-1745-01B-01W-0643-08	brain	ICGC_WXS_GBM_US_TCGA	FALSE	PROF					0.126445	FALSE	DO13977	0	TCGA-28-1745	TRUE	TCGA-28-1745-01B-01W-0643-08	5.71215e-05	5.95015e-07	6.75052e-06	3.27385e-07	5.48805e-05
DO13983_TCGA-28-2502-01B-01D-1494-08	brain	ICGC_WXS_GBM_US_TCGA	FALSE	PROF					0.131636	FALSE	DO13983	0	TCGA-28-2502	TRUE	TCGA-28-2502-01B-01D-1494-08	5.90534e-05	6.15139e-07	1.13735e-05	1.47383e-07	5.69785e-05
DO13995_TCGA-32-2634-01A-01D-1495-08	brain	ICGC_WXS_GBM_US_TCGA	FALSE	PROF					0.0442241	FALSE	DO13995	0	TCGA-32-2634	TRUE	TCGA-32-2634-01A-01D-1495-08	4.77966e-05	4.97881e-07	6.12598e-06	2.53181e-07	4.14189e-05
DO14001_TCGA-12-0618-01A-01D-1492-08	brain	ICGC_WXS_GBM_US_TCGA	FALSE	PROF						FALSE	DO14001	0	TCGA-12-0618	TRUE	TCGA-12-0618-01A-01D-1492-08	4.4995e-05	4.68698e-07	6.63463e-06	2.00614e-07	4.80561e-05
DO14007_TCGA-74-6578-01A-11D-1845-08	brain	ICGC_WXS_GBM_US_TCGA	FALSE	PROF					0.136727	FALSE	DO14007	0	TCGA-74-6578	TRUE	TCGA-74-6578-01A-11D-1845-08	7.27404e-05	7.57713e-07	1.28605e-05	2.31506e-07	7.09674e-05
DO14013_TCGA-06-0882-01A-01D-1492-08	brain	ICGC_WXS_GBM_US_TCGA	FALSE	PROF					0.0753028	FALSE	DO14013	0	TCGA-06-0882	TRUE	TCGA-06-0882-01A-01D-1492-08	3.92124e-05	4.08462e-07	7.23994e-06	1.11442e-07	3.96535e-05
DO14025_TCGA-12-0692-01A-01D-1492-08	brain	ICGC_WXS_GBM_US_TCGA	FALSE	PROF						FALSE	DO14025	0	TCGA-12-0692	TRUE	TCGA-12-0692-01A-01D-1492-08	7.80166e-05	8.12673e-07	1.45655e-05	2.14726e-07	7.3284e-05
DO14049_TCGA-19-2624-01A-01D-1495-08	brain	ICGC_WXS_GBM_US_TCGA	FALSE	PROF					0.0346674	FALSE	DO14049	0	TCGA-19-2624	TRUE	TCGA-19-2624-01A-01D-1495-08	4.55822e-05	4.74815e-07	8.31232e-06	1.34054e-07	4.88052e-05
DO14061_TCGA-28-5214-01A-01D-1486-08	brain	ICGC_WXS_GBM_US_TCGA	FALSE	PROF					0.216899	FALSE	DO14061	0	TCGA-28-5214	TRUE	TCGA-28-5214-01A-01D-1486-08	4.65447e-05	4.8484e-07	8.07422e-06	1.54867e-07	5.13357e-05
DO14067_TCGA-19-5951-01A-11D-1696-08	brain	ICGC_WXS_GBM_US_TCGA	FALSE	PROF					0.15784	FALSE	DO14067	0	TCGA-19-5951	TRUE	TCGA-19-5951-01A-11D-1696-08	7.94503e-05	8.27607e-07	1.39414e-05	2.57443e-07	8.74054e-05
DO14079_TCGA-06-0878-01A-01D-1492-08	brain	ICGC_WXS_GBM_US_TCGA	FALSE	PROF					0.109541	FALSE	DO14079	0	TCGA-06-0878	TRUE	TCGA-06-0878-01A-01D-1492-08	4.47034e-05	4.65661e-07	6.75546e-06	1.92191e-07	4.86703e-05
DO14085_TCGA-14-1037-01A-01W-0643-08	brain	ICGC_WXS_GBM_US_TCGA	FALSE	PROF					0.221285	FALSE	DO14085	0	TCGA-14-1037	TRUE	TCGA-14-1037-01A-01W-0643-08	7.1572e-05	7.45542e-07	1.30233e-05	2.11728e-07	7.01338e-05
DO14097_TCGA-12-1093-01A-01W-0611-08	brain	ICGC_WXS_GBM_US_TCGA	FALSE	PROF					0.164877	FALSE	DO14097	0	TCGA-12-1093	TRUE	TCGA-12-1093-01A-01W-0611-08	7.71713e-05	8.03867e-07	5.9176e-06	5.81531e-07	8.0757e-05
DO14103_TCGA-41-6646-01A-11D-1845-08	brain	ICGC_WXS_GBM_US_TCGA	FALSE	PROF					0.142195	FALSE	DO14103	0	TCGA-41-6646	TRUE	TCGA-41-6646-01A-11D-1845-08	5.47833e-05	5.7066e-07	1.06735e-05	1.31404e-07	5.98007e-05
DO14109_TCGA-06-6388-01A-12D-1845-08	brain	ICGC_WXS_GBM_US_TCGA	FALSE	PROF					0.130779	FALSE	DO14109	0	TCGA-06-6388	TRUE	TCGA-06-6388-01A-12D-1845-08	5.82511e-05	6.06783e-07	1.05285e-05	1.75402e-07	6.22982e-05
DO14121_TCGA-41-3392-01A-01D-1495-08	brain	ICGC_WXS_GBM_US_TCGA	FALSE	PROF					0.0833851	FALSE	DO14121	0	TCGA-41-3392	TRUE	TCGA-41-3392-01A-01D-1495-08	7.01697e-05	7.30934e-07	1.14754e-05	2.63785e-07	7.4751e-05
DO14133_TCGA-12-0775-01A-01W-0348-08	brain	ICGC_WXS_GBM_US_TCGA	FALSE	PROF						FALSE	DO14133	0	TCGA-12-0775	TRUE	TCGA-12-0775-01A-01W-0348-08	0.000156269	1.6278e-06	8.81245e-06	1.31542e-06	0.000160914
DO14139_TCGA-41-3915-01A-01D-1353-08	brain	ICGC_WXS_GBM_US_TCGA	FALSE	PROF					0.0968371	FALSE	DO14139	0	TCGA-41-3915	TRUE	TCGA-41-3915-01A-01D-1353-08	4.32939e-05	4.50978e-07	7.06682e-06	1.63333e-07	4.33277e-05
DO14145_TCGA-76-4928-01B-01D-1486-08	brain	ICGC_WXS_GBM_US_TCGA	FALSE	PROF					0.127561	FALSE	DO14145	0	TCGA-76-4928	TRUE	TCGA-76-4928-01B-01D-1486-08	7.67141e-05	7.99106e-07	1.3194e-05	2.60196e-07	8.0991e-05
DO219105_TCGA-06-A7TL-01A-11D-A391-08	brain	ICGC_WXS_GBM_US_TCGA	FALSE	PROF					0.12801	FALSE	DO219105	0	TCGA-06-A7TL	TRUE	TCGA-06-A7TL-01A-11D-A391-08	2.72772e-05	2.84138e-07	3.19412e-06	1.57617e-07	2.77609e-05
DO219107_TCGA-4W-AA9R-01A-11D-A391-08	brain	ICGC_WXS_GBM_US_TCGA	FALSE	PROF					0.115078	FALSE	DO219107	0	TCGA-4W-AA9R	TRUE	TCGA-4W-AA9R-01A-11D-A391-08	9.11715e-05	9.49704e-07	1.61031e-05	2.90861e-07	8.96191e-05
DO219108_TCGA-4W-AA9S-01A-11D-A391-08	brain	ICGC_WXS_GBM_US_TCGA	FALSE	PROF					0.120518	FALSE	DO219108	0	TCGA-4W-AA9S	TRUE	TCGA-4W-AA9S-01A-11D-A391-08	5.7488e-05	5.98834e-07	9.69583e-06	2.03312e-07	6.22775e-05
DO219109_TCGA-RR-A6KB-01A-12D-A33T-08	brain	ICGC_WXS_GBM_US_TCGA	FALSE	PROF					0.113026	FALSE	DO219109	0	TCGA-RR-A6KB	TRUE	TCGA-RR-A6KB-01A-12D-A33T-08	5.07953e-05	5.29117e-07	9.10284e-06	1.56347e-07	5.07414e-05
DO223727_TCGA-76-6283-01A-11D-1845-08	brain	ICGC_WXS_GBM_US_TCGA	FALSE	PROF					0.150229	FALSE	DO223727	0	TCGA-76-6283	TRUE	TCGA-76-6283-01A-11D-1845-08	0.000105981	1.10397e-06	1.93765e-05	3.09518e-07	0.000103052
DO223728_TCGA-76-6660-01A-11D-1845-08	brain	ICGC_WXS_GBM_US_TCGA	FALSE	PROF					0.131103	FALSE	DO223728	0	TCGA-76-6660	TRUE	TCGA-76-6660-01A-11D-1845-08	7.77478e-05	8.09873e-07	1.22042e-05	3.14465e-07	8.6723e-05
DO44405_TCGA-OX-A56R-01A-11D-A33T-08	brain	ICGC_WXS_GBM_US_TCGA	FALSE	PROF					0.105399	FALSE	DO44405	0	TCGA-OX-A56R	TRUE	TCGA-OX-A56R-01A-11D-A33T-08	2.83162e-05	2.94961e-07	3.05763e-06	1.74844e-07	3.2888e-05
DO44406_TCGA-06-0151-01A-01D-1491-08	brain	ICGC_WXS_GBM_US_TCGA	FALSE	PROF						FALSE	DO44406	0	TCGA-06-0151	TRUE	TCGA-06-0151-01A-01D-1491-08	1.89356e-05	1.97246e-07	3.4025e-06	5.7887e-08	1.67977e-05
DO44408_TCGA-06-0240-01A-03D-1491-08	brain	ICGC_WXS_GBM_US_TCGA	FALSE	PROF						FALSE	DO44408	0	TCGA-06-0240	TRUE	TCGA-06-0240-01A-03D-1491-08	9.29509e-06	9.68239e-08	2.12888e-06	8.47356e-09	9.09801e-06
DO44409_TCGA-06-0140-01A-01D-1490-08	brain	ICGC_WXS_GBM_US_TCGA	FALSE	PROF					0.158247	FALSE	DO44409	0	TCGA-06-0140	TRUE	TCGA-06-0140-01A-01D-1490-08	5.34024e-05	5.56275e-07	9.32308e-06	1.75109e-07	5.2727e-05
DO44410_TCGA-06-0142-01A-01D-1490-08	brain	ICGC_WXS_GBM_US_TCGA	FALSE	PROF					0.123241	FALSE	DO44410	0	TCGA-06-0142	TRUE	TCGA-06-0142-01A-01D-1490-08	2.42754e-05	2.52869e-07	3.35159e-06	1.18142e-07	2.54882e-05
DO44411_TCGA-06-0119-01A-08D-1490-08	brain	ICGC_WXS_GBM_US_TCGA	FALSE						0.250452	FALSE	DO44411	0	TCGA-06-0119	TRUE	TCGA-06-0119-01A-08D-1490-08	7.63632e-05	7.9545e-07	1.18933e-05	3.12936e-07	7.18169e-05
DO44415_TCGA-06-0165-01A-01D-1491-08	brain	ICGC_WXS_GBM_US_TCGA	FALSE	PROF						FALSE	DO44415	0	TCGA-06-0165	TRUE	TCGA-06-0165-01A-01D-1491-08	1.32233e-06	1.37743e-08	3.30583e-07	0	1.3597e-06
DO48886_TCGA-06-1806-01A-02D-1845-08	brain	ICGC_WXS_GBM_US_TCGA	FALSE	PROF					0.140151	FALSE	DO48886	0	TCGA-06-1806	TRUE	TCGA-06-1806-01A-02D-1845-08	2.61694e-05	2.72597e-07	3.72237e-06	1.22607e-07	2.83192e-05
DO48887_TCGA-19-A6J4-01A-11D-A33T-08	brain	ICGC_WXS_GBM_US_TCGA	FALSE	PROF					0.143966	FALSE	DO48887	0	TCGA-19-A6J4	TRUE	TCGA-19-A6J4-01A-11D-A33T-08	3.62194e-05	3.77285e-07	7.02662e-06	8.81837e-08	3.89596e-05
DO50111_TCGA-06-A5U1-01A-11D-A33T-08	brain	ICGC_WXS_GBM_US_TCGA	FALSE	PROF					0.124154	FALSE	DO50111	0	TCGA-06-A5U1	TRUE	TCGA-06-A5U1-01A-11D-A33T-08	7.91453e-05	8.2443e-07	1.21759e-05	3.30888e-07	7.7941e-05
DO50112_TCGA-06-A6S0-01A-11D-A33T-08	brain	ICGC_WXS_GBM_US_TCGA	FALSE	PROF					0.113773	FALSE	DO50112	0	TCGA-06-A6S0	TRUE	TCGA-06-A6S0-01A-11D-A33T-08	7.5718e-05	7.8873e-07	1.45096e-05	1.9217e-07	8.00194e-05
DO50113_TCGA-06-A6S1-01A-11D-A33T-08	brain	ICGC_WXS_GBM_US_TCGA	FALSE	PROF					0.11756	FALSE	DO50113	0	TCGA-06-A6S1	TRUE	TCGA-06-A6S1-01A-11D-A33T-08	4.35478e-05	4.53623e-07	6.843e-06	1.75824e-07	4.4464e-05
DO50114_TCGA-19-A6J5-01A-21D-A33T-08	brain	ICGC_WXS_GBM_US_TCGA	FALSE	PROF					0.108971	FALSE	DO50114	0	TCGA-19-A6J5	TRUE	TCGA-19-A6J5-01A-21D-A33T-08	4.83104e-05	5.03234e-07	8.38421e-06	1.60583e-07	4.82467e-05
DO51160_TCGA-06-A5U0-01A-11D-A33T-08	brain	ICGC_WXS_GBM_US_TCGA	FALSE	PROF					0.109775	FALSE	DO51160	0	TCGA-06-A5U0	TRUE	TCGA-06-A5U0-01A-11D-A33T-08	3.29754e-05	3.43494e-07	5.48702e-06	1.19862e-07	3.67508e-05
DO51162_TCGA-06-A7TK-01A-21D-A391-08	brain	ICGC_WXS_GBM_US_TCGA	FALSE	PROF					0.117147	FALSE	DO51162	0	TCGA-06-A7TK	TRUE	TCGA-06-A7TK-01A-21D-A391-08	5.42399e-05	5.64999e-07	9.4142e-06	1.80251e-07	5.83326e-05
DO51163_TCGA-19-A60I-01A-12D-A33T-08	brain	ICGC_WXS_GBM_US_TCGA	FALSE	PROF					0.109361	FALSE	DO51163	0	TCGA-19-A60I	TRUE	TCGA-19-A60I-01A-12D-A33T-08	3.36564e-05	3.50587e-07	6.58948e-06	7.93311e-08	3.48027e-05
DO51164_TCGA-26-A7UX-01B-11D-A391-08	brain	ICGC_WXS_GBM_US_TCGA	FALSE	PROF					0.111449	FALSE	DO51164	0	TCGA-26-A7UX	TRUE	TCGA-26-A7UX-01B-11D-A391-08	4.16931e-05	4.34303e-07	7.77533e-06	1.15128e-07	4.26204e-05
DO51166_TCGA-4W-AA9T-01A-11D-A391-08	brain	ICGC_WXS_GBM_US_TCGA	FALSE	PROF					0.155907	FALSE	DO51166	0	TCGA-4W-AA9T	TRUE	TCGA-4W-AA9T-01A-11D-A391-08	6.05148e-05	6.30363e-07	1.20592e-05	1.33455e-07	6.21468e-05
DO51167_TCGA-RR-A6KA-01A-21D-A33T-08	brain	ICGC_WXS_GBM_US_TCGA	FALSE	PROF					0.117506	FALSE	DO51167	0	TCGA-RR-A6KA	TRUE	TCGA-RR-A6KA-01A-21D-A33T-08	5.83207e-05	6.07508e-07	9.46868e-06	2.22239e-07	5.46681e-05
DO51168_TCGA-RR-A6KC-01A-31D-A33T-08	brain	ICGC_WXS_GBM_US_TCGA	FALSE	PROF					0.154203	FALSE	DO51168	0	TCGA-RR-A6KC	TRUE	TCGA-RR-A6KC-01A-31D-A33T-08	6.30193e-05	6.56451e-07	1.27168e-05	1.32086e-07	6.3829e-05
DO219788_TCGA-E1-A7YD-01A-11D-A34A-08	brain	ICGC_WXS_LGG_US_TCGA	FALSE	PROF					0.112616	FALSE	DO219788	0	TCGA-E1-A7YD	TRUE	TCGA-E1-A7YD-01A-11D-A34A-08	4.84788e-05	5.04987e-07	6.598e-06	2.40074e-07	5.85848e-05
DO219789_TCGA-E1-A7YH-01A-11D-A34A-08	brain	ICGC_WXS_LGG_US_TCGA	FALSE	PROF					0.116302	FALSE	DO219789	0	TCGA-E1-A7YH	TRUE	TCGA-E1-A7YH-01A-11D-A34A-08	2.88578e-05	3.00602e-07	4.296e-06	1.26889e-07	2.71529e-05
DO219791_TCGA-E1-A7YI-01A-11D-A34A-08	brain	ICGC_WXS_LGG_US_TCGA	FALSE	PROF					0.1091	FALSE	DO219791	0	TCGA-E1-A7YI	TRUE	TCGA-E1-A7YI-01A-11D-A34A-08	4.15907e-05	4.33236e-07	6.81709e-06	1.55677e-07	4.5591e-05
DO219793_TCGA-E1-A7YK-01A-11D-A34A-08	brain	ICGC_WXS_LGG_US_TCGA	FALSE	PROF					0.130201	FALSE	DO219793	0	TCGA-E1-A7YK	TRUE	TCGA-E1-A7YK-01A-11D-A34A-08	5.0028e-05	5.21125e-07	5.61339e-06	2.99722e-07	5.30015e-05
DO219795_TCGA-E1-A7YO-01A-11D-A34A-08	brain	ICGC_WXS_LGG_US_TCGA	FALSE	PROF					0.131273	FALSE	DO219795	0	TCGA-E1-A7YO	TRUE	TCGA-E1-A7YO-01A-11D-A34A-08	2.2288e-05	2.32167e-07	2.79362e-06	1.208e-07	2.31525e-05
DO219797_TCGA-E1-A7YQ-01A-11D-A34J-08	brain	ICGC_WXS_LGG_US_TCGA	FALSE	PROF					0.156287	FALSE	DO219797	0	TCGA-E1-A7YQ	TRUE	TCGA-E1-A7YQ-01A-11D-A34J-08	2.6676e-05	2.77875e-07	3.85529e-06	1.22336e-07	3.3052e-05
DO219799_TCGA-E1-A7YS-01A-11D-A34A-08	brain	ICGC_WXS_LGG_US_TCGA	FALSE	PROF					0.13826	FALSE	DO219799	0	TCGA-E1-A7YS	TRUE	TCGA-E1-A7YS-01A-11D-A34A-08	5.63337e-05	5.8681e-07	8.51195e-06	2.42238e-07	5.43264e-05
DO219801_TCGA-E1-A7YV-01A-11D-A34J-08	brain	ICGC_WXS_LGG_US_TCGA	FALSE	PROF					0.112571	FALSE	DO219801	0	TCGA-E1-A7YV	TRUE	TCGA-E1-A7YV-01A-11D-A34J-08	3.34816e-05	3.48766e-07	2.69893e-06	2.46585e-07	3.76269e-05
DO219803_TCGA-E1-A7YW-01A-11D-A34J-08	brain	ICGC_WXS_LGG_US_TCGA	FALSE	PROF					0.140597	FALSE	DO219803	0	TCGA-E1-A7YW	TRUE	TCGA-E1-A7YW-01A-11D-A34J-08	2.17524e-05	2.26587e-07	3.2379e-06	9.56606e-08	1.9799e-05
DO219805_TCGA-E1-A7Z3-01A-11D-A34J-08	brain	ICGC_WXS_LGG_US_TCGA	FALSE	PROF					0.143402	FALSE	DO219805	0	TCGA-E1-A7Z3	TRUE	TCGA-E1-A7Z3-01A-11D-A34J-08	2.21537e-05	2.30768e-07	2.28992e-06	1.4124e-07	2.04345e-05
DO219807_TCGA-E1-A7Z4-01A-11D-A34J-08	brain	ICGC_WXS_LGG_US_TCGA	FALSE	PROF					0.111817	FALSE	DO219807	0	TCGA-E1-A7Z4	TRUE	TCGA-E1-A7Z4-01A-11D-A34J-08	1.72596e-05	1.79787e-07	1.75096e-06	1.11475e-07	1.83729e-05
DO219809_TCGA-E1-A7Z6-01A-11D-A34J-08	brain	ICGC_WXS_LGG_US_TCGA	FALSE	PROF					0.146966	FALSE	DO219809	0	TCGA-E1-A7Z6	TRUE	TCGA-E1-A7Z6-01A-11D-A34J-08	1.892e-05	1.97083e-07	1.89596e-06	1.23219e-07	2.02841e-05
DO219811_TCGA-HT-A619-01A-11D-A29Q-08	brain	ICGC_WXS_LGG_US_TCGA	FALSE	PROF					0.113732	FALSE	DO219811	0	TCGA-HT-A619	TRUE	TCGA-HT-A619-01A-11D-A29Q-08	5.48485e-05	5.71339e-07	9.11887e-06	1.99707e-07	5.32763e-05
DO219812_TCGA-HT-A61B-01A-11D-A29Q-08	brain	ICGC_WXS_LGG_US_TCGA	FALSE	PROF					0.125361	FALSE	DO219812	0	TCGA-HT-A61B	TRUE	TCGA-HT-A61B-01A-11D-A29Q-08	3.26582e-05	3.40189e-07	3.69783e-06	1.94205e-07	3.46791e-05
DO219813_TCGA-HT-A61C-01A-11D-A29Q-08	brain	ICGC_WXS_LGG_US_TCGA	FALSE	PROF					0.113462	FALSE	DO219813	0	TCGA-HT-A61C	TRUE	TCGA-HT-A61C-01A-11D-A29Q-08	3.854e-05	4.01458e-07	6.24126e-06	1.47554e-07	3.99858e-05
DO219815_TCGA-HT-A74H-01A-11D-A32B-08	brain	ICGC_WXS_LGG_US_TCGA	FALSE	PROF					0.118726	FALSE	DO219815	0	TCGA-HT-A74H	TRUE	TCGA-HT-A74H-01A-11D-A32B-08	6.21769e-05	6.47676e-07	1.24702e-05	1.33652e-07	5.99902e-05
DO219817_TCGA-HT-A74J-01A-12D-A32B-08	brain	ICGC_WXS_LGG_US_TCGA	FALSE	PROF					0.127891	FALSE	DO219817	0	TCGA-HT-A74J	TRUE	TCGA-HT-A74J-01A-12D-A32B-08	2.42963e-05	2.53087e-07	2.70965e-06	1.4628e-07	2.27532e-05
DO219819_TCGA-HT-A74K-01A-11D-A32B-08	brain	ICGC_WXS_LGG_US_TCGA	FALSE	PROF					0.111273	FALSE	DO219819	0	TCGA-HT-A74K	TRUE	TCGA-HT-A74K-01A-11D-A32B-08	2.58129e-05	2.68885e-07	4.02484e-06	1.05582e-07	2.56078e-05
DO219821_TCGA-HT-A74L-01A-11D-A32B-08	brain	ICGC_WXS_LGG_US_TCGA	FALSE	PROF					0.110902	FALSE	DO219821	0	TCGA-HT-A74L	TRUE	TCGA-HT-A74L-01A-11D-A32B-08	1.33628e-05	1.39195e-07	1.39583e-06	8.45592e-08	1.33937e-05
DO219823_TCGA-P5-A72U-01A-31D-A32B-08	brain	ICGC_WXS_LGG_US_TCGA	FALSE	PROF					0.138615	FALSE	DO219823	0	TCGA-P5-A72U	TRUE	TCGA-P5-A72U-01A-31D-A32B-08	7.02955e-05	7.32245e-07	1.20383e-05	2.40679e-07	6.18191e-05
DO219824_TCGA-P5-A72W-01A-11D-A32B-08	brain	ICGC_WXS_LGG_US_TCGA	FALSE	PROF					0.131945	FALSE	DO219824	0	TCGA-P5-A72W	TRUE	TCGA-P5-A72W-01A-11D-A32B-08	3.0207e-05	3.14656e-07	2.57673e-06	2.16305e-07	2.98594e-05
DO219826_TCGA-P5-A72X-01A-11D-A32B-08	brain	ICGC_WXS_LGG_US_TCGA	FALSE	PROF					0.129298	FALSE	DO219826	0	TCGA-P5-A72X	TRUE	TCGA-P5-A72X-01A-11D-A32B-08	3.0421e-06	3.16886e-08	2.86812e-07	2.05962e-08	8.67217e-06
DO219828_TCGA-P5-A72Z-01A-11D-A32B-08	brain	ICGC_WXS_LGG_US_TCGA	FALSE	PROF					0.112267	FALSE	DO219828	0	TCGA-P5-A72Z	TRUE	TCGA-P5-A72Z-01A-11D-A32B-08	2.5815e-05	2.68906e-07	3.8971e-06	1.11159e-07	2.92892e-05
DO219830_TCGA-P5-A730-01A-11D-A32B-08	brain	ICGC_WXS_LGG_US_TCGA	FALSE	PROF					0.141282	FALSE	DO219830	0	TCGA-P5-A730	TRUE	TCGA-P5-A730-01A-11D-A32B-08	1.78272e-05	1.857e-07	1.80187e-06	1.15432e-07	1.78063e-05
DO219832_TCGA-P5-A731-01A-11D-A32B-08	brain	ICGC_WXS_LGG_US_TCGA	FALSE	PROF					0.123685	FALSE	DO219832	0	TCGA-P5-A731	TRUE	TCGA-P5-A731-01A-11D-A32B-08	1.85087e-05	1.92799e-07	2.70251e-06	8.36815e-08	1.94474e-05
DO219834_TCGA-P5-A733-01A-11D-A32B-08	brain	ICGC_WXS_LGG_US_TCGA	FALSE	PROF					0.122791	FALSE	DO219834	0	TCGA-P5-A733	TRUE	TCGA-P5-A733-01A-11D-A32B-08	3.75796e-05	3.91455e-07	5.88812e-06	1.52469e-07	3.66372e-05
DO219836_TCGA-RY-A83X-01A-11D-A36O-08	brain	ICGC_WXS_LGG_US_TCGA	FALSE	PROF					0.118775	FALSE	DO219836	0	TCGA-RY-A83X	TRUE	TCGA-RY-A83X-01A-11D-A36O-08	1.47959e-05	1.54123e-07	2.25466e-06	6.27959e-08	2.32886e-05
DO219837_TCGA-RY-A83Y-01A-11D-A36O-08	brain	ICGC_WXS_LGG_US_TCGA	FALSE	PROF					0.137906	FALSE	DO219837	0	TCGA-RY-A83Y	TRUE	TCGA-RY-A83Y-01A-11D-A36O-08	3.05544e-05	3.18275e-07	4.74384e-06	1.25859e-07	2.72452e-05
DO219839_TCGA-RY-A83Z-01A-11D-A36O-08	brain	ICGC_WXS_LGG_US_TCGA	FALSE	PROF					0.112553	FALSE	DO219839	0	TCGA-RY-A83Z	TRUE	TCGA-RY-A83Z-01A-11D-A36O-08	4.41535e-05	4.59932e-07	5.5171e-06	2.40055e-07	4.36238e-05
DO219841_TCGA-RY-A840-01A-11D-A36O-08	brain	ICGC_WXS_LGG_US_TCGA	FALSE	PROF					0.139518	FALSE	DO219841	0	TCGA-RY-A840	TRUE	TCGA-RY-A840-01A-11D-A36O-08	1.49393e-05	1.55618e-07	1.48337e-06	9.78895e-08	1.81615e-05
DO219843_TCGA-RY-A843-01A-11D-A36O-08	brain	ICGC_WXS_LGG_US_TCGA	FALSE	PROF					0.148579	FALSE	DO219843	0	TCGA-RY-A843	TRUE	TCGA-RY-A843-01A-11D-A36O-08	1.61721e-05	1.6846e-07	1.14921e-06	1.25818e-07	1.62323e-05
DO219845_TCGA-RY-A845-01A-11D-A36O-08	brain	ICGC_WXS_LGG_US_TCGA	FALSE	PROF					0.131327	FALSE	DO219845	0	TCGA-RY-A845	TRUE	TCGA-RY-A845-01A-11D-A36O-08	2.18258e-05	2.27352e-07	2.43135e-06	1.31526e-07	2.39939e-05
DO219847_TCGA-RY-A847-01A-11D-A36O-08	brain	ICGC_WXS_LGG_US_TCGA	FALSE	PROF					0.135076	FALSE	DO219847	0	TCGA-RY-A847	TRUE	TCGA-RY-A847-01A-11D-A36O-08	1.06205e-05	1.1063e-07	1.63726e-06	4.42545e-08	1.6176e-05
DO219849_TCGA-TQ-A7RH-01A-12D-A34A-08	brain	ICGC_WXS_LGG_US_TCGA	FALSE	PROF					0.138715	FALSE	DO219849	0	TCGA-TQ-A7RH	TRUE	TCGA-TQ-A7RH-01A-12D-A34A-08	3.18525e-05	3.31797e-07	4.58638e-06	1.46815e-07	3.7387e-05
DO219851_TCGA-TQ-A7RI-01A-11D-A33T-08	brain	ICGC_WXS_LGG_US_TCGA	FALSE	PROF					0.131592	FALSE	DO219851	0	TCGA-TQ-A7RI	TRUE	TCGA-TQ-A7RI-01A-11D-A33T-08	2.23075e-05	2.3237e-07	3.60017e-06	8.59441e-08	2.66217e-05
DO219853_TCGA-TQ-A7RJ-01A-11D-A33T-08	brain	ICGC_WXS_LGG_US_TCGA	FALSE	PROF					0.131696	FALSE	DO219853	0	TCGA-TQ-A7RJ	TRUE	TCGA-TQ-A7RJ-01A-11D-A33T-08	4.63459e-05	4.8277e-07	6.68e-06	2.13325e-07	4.60644e-05
DO219855_TCGA-TQ-A7RW-01A-11D-A33T-08	brain	ICGC_WXS_LGG_US_TCGA	FALSE	PROF					0.148727	FALSE	DO219855	0	TCGA-TQ-A7RW	TRUE	TCGA-TQ-A7RW-01A-11D-A33T-08	3.36891e-05	3.50928e-07	2.74628e-06	2.46783e-07	4.15439e-05
DO219857_TCGA-WY-A858-01A-11D-A36O-08	brain	ICGC_WXS_LGG_US_TCGA	FALSE	PROF					0.128046	FALSE	DO219857	0	TCGA-WY-A858	TRUE	TCGA-WY-A858-01A-11D-A36O-08	2.56928e-05	2.67634e-07	2.8564e-06	1.55079e-07	2.54801e-05
DO219859_TCGA-WY-A859-01A-12D-A36O-08	brain	ICGC_WXS_LGG_US_TCGA	FALSE	PROF					0.128027	FALSE	DO219859	0	TCGA-WY-A859	TRUE	TCGA-WY-A859-01A-12D-A36O-08	2.72021e-05	2.83355e-07	3.03666e-06	1.63646e-07	2.49785e-05
DO219861_TCGA-WY-A85A-01A-21D-A36O-08	brain	ICGC_WXS_LGG_US_TCGA	FALSE	PROF					0.118256	FALSE	DO219861	0	TCGA-WY-A85A	TRUE	TCGA-WY-A85A-01A-21D-A36O-08	7.65705e-06	7.97609e-08	4.88048e-07	6.20093e-08	1.15874e-05
DO219863_TCGA-WY-A85B-01A-11D-A36O-08	brain	ICGC_WXS_LGG_US_TCGA	FALSE	PROF					0.137867	FALSE	DO219863	0	TCGA-WY-A85B	TRUE	TCGA-WY-A85B-01A-11D-A36O-08	1.14309e-05	1.19071e-07	1.88387e-06	4.23408e-08	1.34589e-05
DO219865_TCGA-WY-A85C-01A-11D-A36O-08	brain	ICGC_WXS_LGG_US_TCGA	FALSE	PROF					0.125961	FALSE	DO219865	0	TCGA-WY-A85C	TRUE	TCGA-WY-A85C-01A-11D-A36O-08	2.48717e-05	2.59081e-07	3.02952e-06	1.38627e-07	2.50418e-05
DO219867_TCGA-WY-A85D-01A-11D-A36O-08	brain	ICGC_WXS_LGG_US_TCGA	FALSE	PROF					0.137953	FALSE	DO219867	0	TCGA-WY-A85D	TRUE	TCGA-WY-A85D-01A-11D-A36O-08	3.52344e-05	3.67025e-07	4.78762e-06	1.74826e-07	3.3525e-05
DO219869_TCGA-WY-A85E-01A-11D-A36O-08	brain	ICGC_WXS_LGG_US_TCGA	FALSE	PROF					0.136449	FALSE	DO219869	0	TCGA-WY-A85E	TRUE	TCGA-WY-A85E-01A-11D-A36O-08	6.68879e-05	6.96749e-07	8.15129e-06	3.72638e-07	6.17803e-05
DO22104_TCGA-HT-7608-01A-11D-2086-08	brain	ICGC_WXS_LGG_US_TCGA	FALSE	PROF					0.118446	FALSE	DO22104	0	TCGA-HT-7608	TRUE	TCGA-HT-7608-01A-11D-2086-08	2.67376e-05	2.78517e-07	4.8997e-06	7.75956e-08	2.47616e-05
DO22105_TCGA-CS-6667-01A-12D-2024-08	brain	ICGC_WXS_LGG_US_TCGA	FALSE	PROF					0.120318	FALSE	DO22105	0	TCGA-CS-6667	TRUE	TCGA-CS-6667-01A-12D-2024-08	2.41808e-05	2.51883e-07	3.06478e-06	1.29584e-07	2.46518e-05
DO22106_TCGA-HT-7602-01A-21D-2086-08	brain	ICGC_WXS_LGG_US_TCGA	FALSE	PROF					0.130007	FALSE	DO22106	0	TCGA-HT-7602	TRUE	TCGA-HT-7602-01A-21D-2086-08	1.22621e-05	1.2773e-07	2.17426e-06	3.87504e-08	1.18725e-05
DO22107_TCGA-HW-7489-01A-11D-2024-08	brain	ICGC_WXS_LGG_US_TCGA	FALSE	PROF					0.14072	FALSE	DO22107	0	TCGA-HW-7489	TRUE	TCGA-HW-7489-01A-11D-2024-08	2.1879e-05	2.27906e-07	3.11706e-06	1.02291e-07	2.19684e-05
DO22109_TCGA-DU-6400-01A-12D-1705-08	brain	ICGC_WXS_LGG_US_TCGA	FALSE	PROF					0.111867	FALSE	DO22109	0	TCGA-DU-6400	TRUE	TCGA-DU-6400-01A-12D-1705-08	4.53526e-05	4.72423e-07	7.0811e-06	1.85089e-07	4.5688e-05
DO22111_TCGA-HT-7483-01A-11D-2024-08	brain	ICGC_WXS_LGG_US_TCGA	FALSE	PROF					0.142154	FALSE	DO22111	0	TCGA-HT-7483	TRUE	TCGA-HT-7483-01A-11D-2024-08	1.56704e-05	1.63233e-07	1.68264e-06	9.71723e-08	1.60485e-05
DO22113_TCGA-FG-8186-01A-11D-2253-08	brain	ICGC_WXS_LGG_US_TCGA	FALSE	PROF					0.131046	FALSE	DO22113	0	TCGA-FG-8186	TRUE	TCGA-FG-8186-01A-11D-2253-08	3.25788e-05	3.39363e-07	5.08651e-06	1.32965e-07	3.22008e-05
DO22115_TCGA-CS-6188-01A-11D-1893-08	brain	ICGC_WXS_LGG_US_TCGA	FALSE	PROF					0.147917	FALSE	DO22115	0	TCGA-CS-6188	TRUE	TCGA-CS-6188-01A-11D-1893-08	3.96793e-05	4.13326e-07	6.79923e-06	1.35678e-07	4.56624e-05
DO22117_TCGA-DU-7009-01A-11D-2024-08	brain	ICGC_WXS_LGG_US_TCGA	FALSE	PROF					0.116021	FALSE	DO22117	0	TCGA-DU-7009	TRUE	TCGA-DU-7009-01A-11D-2024-08	1.78164e-05	1.85588e-07	1.31025e-06	1.36689e-07	1.97013e-05
DO22119_TCGA-FG-6689-01A-11D-1893-08	brain	ICGC_WXS_LGG_US_TCGA	FALSE	PROF					0.149989	FALSE	DO22119	0	TCGA-FG-6689	TRUE	TCGA-FG-6689-01A-11D-1893-08	1.95841e-05	2.04001e-07	2.46304e-06	1.05782e-07	2.07684e-05
DO22121_TCGA-HT-7684-01A-11D-2253-08	brain	ICGC_WXS_LGG_US_TCGA	FALSE	PROF					0.175957	FALSE	DO22121	0	TCGA-HT-7684	TRUE	TCGA-HT-7684-01A-11D-2253-08	3.43244e-05	3.57545e-07	5.44521e-06	1.36343e-07	3.42781e-05
DO22123_TCGA-FG-7634-01A-11D-2086-08	brain	ICGC_WXS_LGG_US_TCGA	FALSE	PROF					0.125709	FALSE	DO22123	0	TCGA-FG-7634	TRUE	TCGA-FG-7634-01A-11D-2086-08	1.76259e-05	1.83603e-07	3.11509e-06	5.61473e-08	2.10273e-05
DO22125_TCGA-DU-8162-01A-21D-2253-08	brain	ICGC_WXS_LGG_US_TCGA	FALSE	PROF					0.124266	FALSE	DO22125	0	TCGA-DU-8162	TRUE	TCGA-DU-8162-01A-21D-2253-08	2.76927e-05	2.88466e-07	4.1003e-06	1.22734e-07	2.98175e-05
DO22127_TCGA-CS-4938-01B-11D-1893-08	brain	ICGC_WXS_LGG_US_TCGA	FALSE	PROF					0.139201	FALSE	DO22127	0	TCGA-CS-4938	TRUE	TCGA-CS-4938-01B-11D-1893-08	1.59386e-05	1.66027e-07	1.54972e-06	1.05867e-07	1.64947e-05
DO22129_TCGA-CS-5393-01A-01D-1468-08	brain	ICGC_WXS_LGG_US_TCGA	FALSE	PROF					0.133409	FALSE	DO22129	0	TCGA-CS-5393	TRUE	TCGA-CS-5393-01A-01D-1468-08	2.66916e-05	2.78038e-07	2.90374e-06	1.63877e-07	2.5388e-05
DO22131_TCGA-HT-7467-01A-11D-2024-08	brain	ICGC_WXS_LGG_US_TCGA	FALSE	PROF					0.127664	FALSE	DO22131	0	TCGA-HT-7467	TRUE	TCGA-HT-7467-01A-11D-2024-08	3.11387e-05	3.24362e-07	5.39132e-06	1.04059e-07	3.35916e-05
DO22133_TCGA-HT-7610-01A-21D-2086-08	brain	ICGC_WXS_LGG_US_TCGA	FALSE	PROF					0.125814	FALSE	DO22133	0	TCGA-HT-7610	TRUE	TCGA-HT-7610-01A-21D-2086-08	1.75642e-05	1.82961e-07	2.05699e-06	1.01481e-07	1.77548e-05
DO22135_TCGA-HT-7857-01A-11D-2395-08	brain	ICGC_WXS_LGG_US_TCGA	FALSE	PROF					0.130207	FALSE	DO22135	0	TCGA-HT-7857	TRUE	TCGA-HT-7857-01A-11D-2395-08	1.31568e-05	1.3705e-07	9.76095e-07	1.00569e-07	1.39393e-05
DO22137_TCGA-HT-7680-01A-11D-2253-08	brain	ICGC_WXS_LGG_US_TCGA	FALSE	PROF					0.129301	FALSE	DO22137	0	TCGA-HT-7680	TRUE	TCGA-HT-7680-01A-11D-2253-08	4.10456e-06	4.27558e-08	7.7486e-07	1.09252e-08	3.33802e-06
DO22139_TCGA-CS-6186-01A-12D-2024-08	brain	ICGC_WXS_LGG_US_TCGA	FALSE	PROF					0.140264	FALSE	DO22139	0	TCGA-CS-6186	TRUE	TCGA-CS-6186-01A-12D-2024-08	6.35524e-05	6.62004e-07	1.19749e-05	1.70139e-07	5.89245e-05
DO22141_TCGA-FG-6690-01A-11D-1893-08	brain	ICGC_WXS_LGG_US_TCGA	FALSE	PROF					0.133316	FALSE	DO22141	0	TCGA-FG-6690	TRUE	TCGA-FG-6690-01A-11D-1893-08	3.51299e-05	3.65936e-07	4.88034e-06	1.69658e-07	3.5374e-05
DO22143_TCGA-DU-6396-01A-11D-1705-08	brain	ICGC_WXS_LGG_US_TCGA	FALSE	PROF					0.131906	FALSE	DO22143	0	TCGA-DU-6396	TRUE	TCGA-DU-6396-01A-11D-1705-08	3.49446e-05	3.64006e-07	4.5008e-06	1.84145e-07	3.77869e-05
DO22145_TCGA-EZ-7264-01A-11D-2024-08	brain	ICGC_WXS_LGG_US_TCGA	FALSE	PROF					0.123182	FALSE	DO22145	0	TCGA-EZ-7264	TRUE	TCGA-EZ-7264-01A-11D-2024-08	3.11122e-05	3.24086e-07	5.0536e-06	1.18455e-07	3.44114e-05
DO22149_TCGA-DU-6393-01A-11D-1705-08	brain	ICGC_WXS_LGG_US_TCGA	FALSE	PROF					0.162859	FALSE	DO22149	0	TCGA-DU-6393	TRUE	TCGA-DU-6393-01A-11D-1705-08	2.51314e-05	2.61785e-07	2.74985e-06	1.53609e-07	2.66922e-05
DO22151_TCGA-HT-7687-01A-11D-2253-08	brain	ICGC_WXS_LGG_US_TCGA	FALSE	PROF					0.120451	FALSE	DO22151	0	TCGA-HT-7687	TRUE	TCGA-HT-7687-01A-11D-2253-08	4.06998e-05	4.23957e-07	5.40144e-06	2.07544e-07	4.24656e-05
DO22153_TCGA-E1-5303-01A-01D-1468-08	brain	ICGC_WXS_LGG_US_TCGA	FALSE	PROF					0.159898	FALSE	DO22153	0	TCGA-E1-5303	TRUE	TCGA-E1-5303-01A-01D-1468-08	2.22001e-05	2.31251e-07	2.54504e-06	1.30651e-07	2.35878e-05
DO22155_TCGA-HW-7490-01A-11D-2024-08	brain	ICGC_WXS_LGG_US_TCGA	FALSE	PROF					0.147325	FALSE	DO22155	0	TCGA-HW-7490	TRUE	TCGA-HW-7490-01A-11D-2024-08	8.04371e-05	8.37887e-07	2.90374e-06	7.48067e-07	8.83189e-05
DO22157_TCGA-HT-7875-01A-11D-2395-08	brain	ICGC_WXS_LGG_US_TCGA	FALSE	PROF					0.135432	FALSE	DO22157	0	TCGA-HT-7875	TRUE	TCGA-HT-7875-01A-11D-2395-08	2.77268e-05	2.88821e-07	3.68217e-06	1.41284e-07	2.81007e-05
DO22159_TCGA-DU-5872-01A-11D-1705-08	brain	ICGC_WXS_LGG_US_TCGA	FALSE	PROF					0.117366	FALSE	DO22159	0	TCGA-DU-5872	TRUE	TCGA-DU-5872-01A-11D-1705-08	1.98024e-05	2.06275e-07	9.04208e-07	1.7593e-07	2.24571e-05
DO22159_TCGA-DU-5872-02A-21D-A36O-08	brain	ICGC_WXS_LGG_US_TCGA	FALSE	PROF					0.117366	FALSE	DO22159	0	TCGA-DU-5872	TRUE	TCGA-DU-5872-02A-21D-A36O-08	6.14544e-06	6.4015e-08	3.30583e-07	5.2425e-08	7.00344e-06
DO22161_TCGA-CS-6670-01A-11D-1893-08	brain	ICGC_WXS_LGG_US_TCGA	FALSE	PROF					0.112258	FALSE	DO22161	0	TCGA-CS-6670	TRUE	TCGA-CS-6670-01A-11D-1893-08	2.76447e-05	2.87965e-07	2.239e-06	2.03138e-07	3.27401e-05
DO22163_TCGA-HW-7491-01A-11D-2024-08	brain	ICGC_WXS_LGG_US_TCGA	FALSE	PROF					0.127879	FALSE	DO22163	0	TCGA-HW-7491	TRUE	TCGA-HW-7491-01A-11D-2024-08	1.72802e-05	1.80002e-07	2.90017e-06	6.17338e-08	1.64076e-05
DO22165_TCGA-DU-7019-01A-11D-2024-08	brain	ICGC_WXS_LGG_US_TCGA	FALSE	PROF					0.135867	FALSE	DO22165	0	TCGA-DU-7019	TRUE	TCGA-DU-7019-01A-11D-2024-08	3.21481e-05	3.34876e-07	5.82314e-06	9.62555e-08	3.16099e-05
DO22167_TCGA-HT-7881-01A-11D-2395-08	brain	ICGC_WXS_LGG_US_TCGA	FALSE	PROF					0.124073	FALSE	DO22167	0	TCGA-HT-7881	TRUE	TCGA-HT-7881-01A-11D-2395-08	1.54988e-05	1.61446e-07	2.08511e-06	7.78086e-08	1.74788e-05
DO22169_TCGA-HT-7880-01A-11D-2395-08	brain	ICGC_WXS_LGG_US_TCGA	FALSE	PROF					0.125245	FALSE	DO22169	0	TCGA-HT-7880	TRUE	TCGA-HT-7880-01A-11D-2395-08	8.93062e-06	9.30273e-08	8.18631e-07	6.14793e-08	8.84399e-06
DO22171_TCGA-DU-5852-01A-11D-1705-08	brain	ICGC_WXS_LGG_US_TCGA	FALSE	PROF					0.112365	FALSE	DO22171	0	TCGA-DU-5852	TRUE	TCGA-DU-5852-01A-11D-1705-08	6.74239e-05	7.02333e-07	1.06369e-05	2.70395e-07	7.29359e-05
DO22173_TCGA-CS-4942-01A-01D-1468-08	brain	ICGC_WXS_LGG_US_TCGA	FALSE	PROF					0.125212	FALSE	DO22173	0	TCGA-CS-4942	TRUE	TCGA-CS-4942-01A-01D-1468-08	1.9021e-05	1.98135e-07	1.85219e-06	1.2622e-07	2.4641e-05
DO22175_TCGA-DH-5144-01A-01D-1468-08	brain	ICGC_WXS_LGG_US_TCGA	FALSE	PROF					0.165338	FALSE	DO22175	0	TCGA-DH-5144	TRUE	TCGA-DH-5144-01A-01D-1468-08	4.06572e-05	4.23512e-07	5.73559e-06	1.92552e-07	4.01617e-05
DO22179_TCGA-DU-7306-01A-11D-2086-08	brain	ICGC_WXS_LGG_US_TCGA	FALSE	PROF					0.159417	FALSE	DO22179	0	TCGA-DU-7306	TRUE	TCGA-DU-7306-01A-11D-2086-08	5.5584e-05	5.79e-07	6.19195e-06	3.34959e-07	5.16119e-05
DO22181_TCGA-HT-8013-01A-11D-2395-08	brain	ICGC_WXS_LGG_US_TCGA	FALSE	PROF					0.15192	FALSE	DO22181	0	TCGA-HT-8013	TRUE	TCGA-HT-8013-01A-11D-2395-08	2.40938e-05	2.50977e-07	3.5966e-06	1.05516e-07	2.99158e-05
DO22183_TCGA-HT-8109-01A-11D-2395-08	brain	ICGC_WXS_LGG_US_TCGA	FALSE	PROF					0.12418	FALSE	DO22183	0	TCGA-HT-8109	TRUE	TCGA-HT-8109-01A-11D-2395-08	3.37208e-05	3.51259e-07	3.68574e-06	2.06281e-07	3.64862e-05
DO22185_TCGA-HT-8110-01A-11D-2395-08	brain	ICGC_WXS_LGG_US_TCGA	FALSE	PROF					0.130265	FALSE	DO22185	0	TCGA-HT-8110	TRUE	TCGA-HT-8110-01A-11D-2395-08	3.26898e-05	3.40519e-07	5.01302e-06	1.37367e-07	3.68495e-05
DO22187_TCGA-DU-7012-01A-11D-2024-08	brain	ICGC_WXS_LGG_US_TCGA	FALSE	PROF					0.130556	FALSE	DO22187	0	TCGA-DU-7012	TRUE	TCGA-DU-7012-01A-11D-2024-08	6.20094e-05	6.45931e-07	1.10479e-05	1.93672e-07	6.27792e-05
DO22189_TCGA-HT-7882-01A-11D-2395-08	brain	ICGC_WXS_LGG_US_TCGA	FALSE	PROF					0.138441	FALSE	DO22189	0	TCGA-HT-7882	TRUE	TCGA-HT-7882-01A-11D-2395-08	6.13893e-05	6.39472e-07	1.18129e-05	1.53672e-07	5.96658e-05
DO22191_TCGA-HT-7693-01A-11D-2253-08	brain	ICGC_WXS_LGG_US_TCGA	FALSE	PROF					0.131866	FALSE	DO22191	0	TCGA-HT-7693	TRUE	TCGA-HT-7693-01A-11D-2253-08	3.26845e-05	3.40463e-07	4.38711e-06	1.64522e-07	3.76902e-05
DO22193_TCGA-FN-7833-01A-11D-2086-08	brain	ICGC_WXS_LGG_US_TCGA	FALSE	PROF					0.131775	FALSE	DO22193	0	TCGA-FN-7833	TRUE	TCGA-FN-7833-01A-11D-2086-08	1.34507e-05	1.40112e-07	1.23479e-06	9.25172e-08	1.45575e-05
DO22195_TCGA-E1-5318-01A-01D-1468-08	brain	ICGC_WXS_LGG_US_TCGA	FALSE	PROF					0.136104	FALSE	DO22195	0	TCGA-E1-5318	TRUE	TCGA-E1-5318-01A-01D-1468-08	3.4313e-05	3.57427e-07	4.20685e-06	1.90061e-07	3.35211e-05
DO22197_TCGA-HT-8011-01A-11D-2395-08	brain	ICGC_WXS_LGG_US_TCGA	FALSE	PROF					0.113056	FALSE	DO22197	0	TCGA-HT-8011	TRUE	TCGA-HT-8011-01A-11D-2395-08	4.96151e-05	5.16824e-07	9.17473e-06	1.40394e-07	5.02419e-05
DO22199_TCGA-DU-5870-01A-11D-1705-08	brain	ICGC_WXS_LGG_US_TCGA	FALSE	PROF					0.128467	FALSE	DO22199	0	TCGA-DU-5870	TRUE	TCGA-DU-5870-01A-11D-1705-08	1.17398e-05	1.22289e-07	1.34848e-06	6.89764e-08	1.29419e-05
DO22199_TCGA-DU-5870-02A-12D-A36O-08	brain	ICGC_WXS_LGG_US_TCGA	FALSE	PROF					0.128467	FALSE	DO22199	0	TCGA-DU-5870	TRUE	TCGA-DU-5870-02A-12D-A36O-08	2.79849e-05	2.91509e-07	2.32458e-06	2.03115e-07	3.3187e-05
DO22201_TCGA-DB-5280-01A-01D-1468-08	brain	ICGC_WXS_LGG_US_TCGA	FALSE	PROF					0.185191	FALSE	DO22201	0	TCGA-DB-5280	TRUE	TCGA-DB-5280-01A-01D-1468-08	1.69691e-05	1.76762e-07	9.47979e-07	1.43231e-07	1.97011e-05
DO22203_TCGA-FG-7636-01A-11D-2086-08	brain	ICGC_WXS_LGG_US_TCGA	FALSE	PROF					0.127223	FALSE	DO22203	0	TCGA-FG-7636	TRUE	TCGA-FG-7636-01A-11D-2086-08	3.64218e-05	3.79394e-07	4.42731e-06	2.03397e-07	4.13392e-05
DO22205_TCGA-DU-6410-01A-11D-1893-08	brain	ICGC_WXS_LGG_US_TCGA	FALSE	PROF					0.124924	FALSE	DO22205	0	TCGA-DU-6410	TRUE	TCGA-DU-6410-01A-11D-1893-08	3.29811e-05	3.43553e-07	2.74628e-06	2.39087e-07	3.42768e-05
DO22207_TCGA-DU-6404-01A-11D-1705-08	brain	ICGC_WXS_LGG_US_TCGA	FALSE	PROF					0.126135	FALSE	DO22207	0	TCGA-DU-6404	TRUE	TCGA-DU-6404-01A-11D-1705-08	1.49181e-05	1.55397e-07	3.06121e-06	2.90573e-08	1.63243e-05
DO22207_TCGA-DU-6404-02B-11D-A36O-08	brain	ICGC_WXS_LGG_US_TCGA	FALSE	PROF					0.126135	FALSE	DO22207	0	TCGA-DU-6404	TRUE	TCGA-DU-6404-02B-11D-A36O-08	6.89885e-05	7.1863e-07	4.00918e-06	5.75563e-07	6.64115e-05
DO22209_TCGA-HT-7470-01A-12D-2086-08	brain	ICGC_WXS_LGG_US_TCGA	FALSE	PROF					0.127324	FALSE	DO22209	0	TCGA-HT-7470	TRUE	TCGA-HT-7470-01A-12D-2086-08	3.58715e-05	3.73662e-07	6.02241e-06	1.28064e-07	3.57381e-05
DO22211_TCGA-HT-7874-01A-11D-2395-08	brain	ICGC_WXS_LGG_US_TCGA	FALSE	PROF					0.122831	FALSE	DO22211	0	TCGA-HT-7874	TRUE	TCGA-HT-7874-01A-11D-2395-08	1.90471e-05	1.98407e-07	1.80187e-06	1.28691e-07	1.98947e-05
DO22213_TCGA-FG-8188-01A-11D-2253-08	brain	ICGC_WXS_LGG_US_TCGA	FALSE	PROF					0.144192	FALSE	DO22213	0	TCGA-FG-8188	TRUE	TCGA-FG-8188-01A-11D-2253-08	2.98024e-05	3.10442e-07	3.27452e-06	1.81569e-07	3.1366e-05
DO22215_TCGA-DU-8166-01A-11D-2253-08	brain	ICGC_WXS_LGG_US_TCGA	FALSE	PROF					0.142715	FALSE	DO22215	0	TCGA-DU-8166	TRUE	TCGA-DU-8166-01A-11D-2253-08	2.2655e-05	2.35989e-07	2.67082e-06	1.30127e-07	2.37211e-05
DO22217_TCGA-DU-7013-01A-11D-2024-08	brain	ICGC_WXS_LGG_US_TCGA	FALSE	PROF					0.197072	FALSE	DO22217	0	TCGA-DU-7013	TRUE	TCGA-DU-7013-01A-11D-2024-08	4.34221e-05	4.52313e-07	7.09676e-06	1.63424e-07	4.06153e-05
DO22219_TCGA-FG-8185-01A-11D-2253-08	brain	ICGC_WXS_LGG_US_TCGA	FALSE	PROF					0.160294	FALSE	DO22219	0	TCGA-FG-8185	TRUE	TCGA-FG-8185-01A-11D-2253-08	3.72292e-05	3.87804e-07	4.22965e-06	2.20767e-07	3.69489e-05
DO22221_TCGA-DH-5141-01A-01D-1468-08	brain	ICGC_WXS_LGG_US_TCGA	FALSE	PROF					0.125501	FALSE	DO22221	0	TCGA-DH-5141	TRUE	TCGA-DH-5141-01A-01D-1468-08	2.68463e-05	2.79649e-07	3.96541e-06	1.19399e-07	2.56377e-05
DO22223_TCGA-DU-7018-01A-11D-2024-08	brain	ICGC_WXS_LGG_US_TCGA	FALSE	PROF					0.114488	FALSE	DO22223	0	TCGA-DU-7018	TRUE	TCGA-DU-7018-01A-11D-2024-08	3.00965e-05	3.13505e-07	3.7188e-06	1.65448e-07	3.40261e-05
DO22225_TCGA-DU-8165-01A-11D-2253-08	brain	ICGC_WXS_LGG_US_TCGA	FALSE	PROF					0.126388	FALSE	DO22225	0	TCGA-DU-8165	TRUE	TCGA-DU-8165-01A-11D-2253-08	5.7221e-05	5.96053e-07	5.07086e-06	4.01496e-07	5.84981e-05
DO22227_TCGA-FG-8191-01A-11D-2253-08	brain	ICGC_WXS_LGG_US_TCGA	FALSE	PROF					0.128719	FALSE	DO22227	0	TCGA-FG-8191	TRUE	TCGA-FG-8191-01A-11D-2253-08	2.6064e-05	2.715e-07	4.21042e-06	1.00242e-07	2.67908e-05
DO22231_TCGA-HT-7691-01A-11D-2253-08	brain	ICGC_WXS_LGG_US_TCGA	FALSE	PROF					0.129465	FALSE	DO22231	0	TCGA-HT-7691	TRUE	TCGA-HT-7691-01A-11D-2253-08	6.2709e-06	6.53219e-08	6.17396e-07	4.13187e-08	5.05839e-06
DO22233_TCGA-DU-6542-01A-11D-1893-08	brain	ICGC_WXS_LGG_US_TCGA	FALSE	PROF					0.111596	FALSE	DO22233	0	TCGA-DU-6542	TRUE	TCGA-DU-6542-01A-11D-1893-08	2.07973e-05	2.16639e-07	2.41926e-06	1.20872e-07	2.2329e-05
[truncated: 14,309 more rows]

## Sheet: Table6
gene	variant	Source
POLE	F104L	Shlien2015NatCom
POLE	E978G	Campbell2017Cell
POLE	E978K	Campbell2017Cell
POLE	C810G	Campbell2017Cell
[truncated: 54 more rows]

[truncated: 5 more sheets: Table7, Table8, Table9, Table10, Table11]
